# Supplementary material
Source: MDPI journal article supplement (https://www.mdpi.com/2304-6740/9/5/30)
Supplement: s1 [file s1]

# checkCIF/PLATON report

Structure factors have been supplied for datablock(s) ThRe, ThRu

THIS REPORT IS FOR GUIDANCE ONLY. IF USED AS PART OF A REVIEW PROCEDURE FOR PUBLICATION, IT SHOULD NOT REPLACE THE EXPERTISE OF AN EXPERIENCED CRYSTALLOGRAPHIC REFEREE.

No syntax errors found.      CIF dictionary      Interpreting this report

## Datablock: ThRe

---

|                                                               |                      |                                  |
|---------------------------------------------------------------|----------------------|----------------------------------|
| Bond precision:                                               | C-C = 0.0084 Å       | Wavelength=1.54184               |
| Cell:                                                         | a=26.6348(2)         | b=15.8017(1)      c=20.0442(1)   |
|                                                               | alpha=90             | beta=108.307(1)      gamma=90    |
| Temperature:                                                  | 150 K                |                                  |
|                                                               | Calculated           | Reported                         |
| Volume                                                        | 8009.13(10)          | 8009.13(10)                      |
| Space group                                                   | P 21/c               | P 1 21/c 1                       |
| Hall group                                                    | -P 2ybc              | -P 2ybc                          |
| Moiety formula                                                | C34 H67 N4 Re Si3 Th | C34 H67 N4 Re Si3 Th             |
| Sum formula                                                   | C34 H67 N4 Re Si3 Th | C34 H67 N4 Re Si3 Th             |
| Mr                                                            | 1034.44              | 1034.42                          |
| Dx,g cm-3                                                     | 1.716                | 1.716                            |
| Z                                                             | 8                    | 8                                |
| Mu (mm-1)                                                     | 18.769               | 18.769                           |
| F000                                                          | 4048.0               | 4048.0                           |
| F000'                                                         | 3987.15              |                                  |
| h,k,lmax                                                      | 33,19,25             | 33,19,25                         |
| Nref                                                          | 16953                | 16480                            |
| Tmin,Tmax                                                     | 0.119,0.236          | 0.758,1.000                      |
| Tmin'                                                         | 0.032                |                                  |
| Correction method= # Reported T Limits: Tmin=0.758 Tmax=1.000 |                      |                                  |
| AbsCorr = GAUSSIAN                                            |                      |                                  |
| Data completeness=                                            | 0.972                | Theta(max)= 77.107               |
| R(reflections)=                                               | 0.0307( 15534)       | wR2(reflections)= 0.0791( 16480) |
| S =                                                           | 1.058                | Npar= 805                        |

---

The following ALERTS were generated. Each ALERT has the format  
**test-name\_ALERT\_alert-type\_alert-level.**  
Click on the hyperlinks for more details of the test.

---

 **Alert level A**

PLAT971\_ALERT\_2\_A Check Calcd Resid. Dens. 1.16A From Th2 4.40 eA-3

**Author Response: Residual density is close to thorium and is present despite applying the correct absorption correction. It is of no chemical significance.**

---

 **Alert level B**

PLAT971\_ALERT\_2\_B Check Calcd Resid. Dens. 1.16A From N3 3.32 eA-3

**Author Response: Residual density is close to thorium and is present despite applying the correct absorption correction. It is of no chemical significance.**

---

 **Alert level C**

PLAT094\_ALERT\_2\_C Ratio of Maximum / Minimum Residual Density .... 2.52 Report  
PLAT242\_ALERT\_2\_C Low 'MainMol' Ueq as Compared to Neighbors of C15 Check  
PLAT242\_ALERT\_2\_C Low 'MainMol' Ueq as Compared to Neighbors of Si6 Check  
PLAT342\_ALERT\_3\_C Low Bond Precision on C-C Bonds ..... 0.00836 Ang.  
PLAT911\_ALERT\_3\_C Missing FCF Refl Between Thmin & STh/L= 0.600 54 Report  
PLAT971\_ALERT\_2\_C Check Calcd Resid. Dens. 0.94A From C15 2.40 eA-3

**Author Response: Residual density is close to thorium and is present despite applying the correct absorption correction. It is of no chemical significance.**

PLAT971\_ALERT\_2\_C Check Calcd Resid. Dens. 0.79A From Re1 1.58 eA-3

**Author Response: Residual density is close to thorium and is present despite applying the correct absorption correction. It is of no chemical significance.**

PLAT972\_ALERT\_2\_C Check Calcd Resid. Dens. 0.86A From Th2 -1.94 eA-3  
PLAT972\_ALERT\_2\_C Check Calcd Resid. Dens. 0.78A From Th1 -1.74 eA-3  
PLAT972\_ALERT\_2\_C Check Calcd Resid. Dens. 0.71A From Th2 -1.65 eA-3  
PLAT972\_ALERT\_2\_C Check Calcd Resid. Dens. 0.70A From Re2 -1.53 eA-3  
PLAT972\_ALERT\_2\_C Check Calcd Resid. Dens. 0.77A From Th1 -1.52 eA-3  
PLAT972\_ALERT\_2\_C Check Calcd Resid. Dens. 0.66A From Re2 -1.51 eA-3

---

 **Alert level G**

PLAT083\_ALERT\_2\_G SHELXL Second Parameter in WGHT Unusually Large 26.35 Why ?  
PLAT142\_ALERT\_4\_G s.u. on b - Axis Small or Missing ..... 0.00010 Ang.  
PLAT143\_ALERT\_4\_G s.u. on c - Axis Small or Missing ..... 0.00010 Ang.  
PLAT912\_ALERT\_4\_G Missing # of FCF Reflections Above STh/L= 0.600 419 Note

|                                                                    |         |
|--------------------------------------------------------------------|---------|
| PLAT913_ALERT_3_G Missing # of Very Strong Reflections in FCF .... | 1 Note  |
| PLAT941_ALERT_3_G Average HKL Measurement Multiplicity .....       | 3.3 Low |
| PLAT978_ALERT_2_G Number C-C Bonds with Positive Residual Density. | 0 Info  |

---

1 **ALERT level A** = Most likely a serious problem - resolve or explain  
1 **ALERT level B** = A potentially serious problem, consider carefully  
13 **ALERT level C** = Check. Ensure it is not caused by an omission or oversight  
7 **ALERT level G** = General information/check it is not something unexpected

0 ALERT type 1 CIF construction/syntax error, inconsistent or missing data  
15 ALERT type 2 Indicator that the structure model may be wrong or deficient  
4 ALERT type 3 Indicator that the structure quality may be low  
3 ALERT type 4 Improvement, methodology, query or suggestion  
0 ALERT type 5 Informative message, check

---

## Datablock: ThRu

---

Bond precision: C-C = 0.0064 A Wavelength=0.71073

Cell: a=22.1371(8) b=23.1349(7) c=19.0421(7)  
alpha=90 beta=114.222(4) gamma=90  
Temperature: 150 K

|                | Calculated                        | Reported                            |
|----------------|-----------------------------------|-------------------------------------|
| Volume         | 8893.7(6)                         | 8893.7(6)                           |
| Space group    | C 2/c                             | C 1 2/c 1                           |
| Hall group     | -C 2yc                            | -C 2yc                              |
| Moiety formula | C31 H62 N4 O2 Ru Si3 Th,<br>C6 H6 | C31 H62 N4 O2 Ru Si3 Th,<br>(C6 H6) |
| Sum formula    | C37 H68 N4 O2 Ru Si3 Th           | C37 H68 N4 O2 Ru Si3 Th             |
| Mr             | 1018.33                           | 1018.33                             |
| Dx,g cm-3      | 1.521                             | 1.521                               |
| Z              | 8                                 | 8                                   |
| Mu (mm-1)      | 3.794                             | 3.794                               |
| F000           | 4080.0                            | 4080.0                              |
| F000'          | 4015.35                           |                                     |
| h,k,lmax       | 30,32,26                          | 30,31,26                            |
| Nref           | 12642                             | 11275                               |
| Tmin,Tmax      | 0.623,0.773                       | 0.897,0.976                         |
| Tmin'          | 0.181                             |                                     |

Correction method= # Reported T Limits: Tmin=0.897 Tmax=0.976  
AbsCorr = GAUSSIAN

Data completeness= 0.892 Theta(max)= 29.699

R(reflections)= 0.0347( 8861) wR2(reflections)= 0.0636( 11275)

S = 1.049

Npar= 479

The following ALERTS were generated. Each ALERT has the format  
**test-name\_ALERT\_alert-type\_alert-level**.  
 Click on the hyperlinks for more details of the test.

### Alert level B

PLAT910\_ALERT\_3\_B Missing # of FCF Reflection(s) Below Theta(Min). 21 Note

**Author Response: Missing reflections at low angle are most likely due to obfuscation by the beamstop.**

### Alert level C

|                   |             |           |         |                                 |         |      |        |
|-------------------|-------------|-----------|---------|---------------------------------|---------|------|--------|
| PLAT220_ALERT_2_C | NonSolvent  | Resd 1    | C       | Ueq(max)/Ueq(min)               | Range   | 3.8  | Ratio  |
| PLAT222_ALERT_3_C | NonSolvent  | Resd 1    | H       | Uiso(max)/Uiso(min)             | Range   | 4.8  | Ratio  |
| PLAT242_ALERT_2_C | Low         | 'MainMol' |         | Ueq as Compared to Neighbors of |         | C15  | Check  |
| PLAT331_ALERT_2_C | Small Aver  | Phenyl    | C-C     | Dist C35                        | --C35_b | 1.37 | Ang.   |
| PLAT911_ALERT_3_C | Missing FCF | Refl      | Between | Thmin & STh/L=                  | 0.600   | 4    | Report |
| PLAT973_ALERT_2_C | Check Calcd | Positive  | Resid.  | Density on                      | Th1     | 1.25 | eA-3   |
| PLAT975_ALERT_2_C | Check Calcd | Resid.    | Dens.   | 0.66A                           | From N4 | 0.58 | eA-3   |

### Alert level G

|                   |                             |                               |                   |               |       |      |              |
|-------------------|-----------------------------|-------------------------------|-------------------|---------------|-------|------|--------------|
| PLAT002_ALERT_2_G | Number of Distance or Angle | Restraints on AtSite          |                   |               |       | 15   | Note         |
| PLAT003_ALERT_2_G | Number of Uiso or Uij       | Restrained non-H Atoms ...    |                   |               |       | 13   | Report       |
| PLAT042_ALERT_1_G | Calc. and Reported          | Moiety Formula Strings Differ |                   |               |       |      | Please Check |
| PLAT083_ALERT_2_G | SHELXL Second               | Parameter in WGHT             | Unusually Large   |               |       | 8.06 | Why ?        |
| PLAT176_ALERT_4_G | The CIF-Embedded .res       | File Contains SADI            | Records           |               |       | 2    | Report       |
| PLAT178_ALERT_4_G | The CIF-Embedded .res       | File Contains SIMU            | Records           |               |       | 2    | Report       |
| PLAT187_ALERT_4_G | The CIF-Embedded .res       | File Contains RIGU            | Records           |               |       | 2    | Report       |
| PLAT301_ALERT_3_G | Main Residue                | Disorder                      | .....(Resd 1 )    |               |       | 7%   | Note         |
| PLAT412_ALERT_2_G | Short Intra                 | XH3 .. XHn                    | H6A               | ..H24C        | .     | 2.11 | Ang.         |
|                   |                             |                               |                   | x,y,z =       | 1_555 |      | Check        |
| PLAT412_ALERT_2_G | Short Intra                 | XH3 .. XHn                    | H20B              | ..H23F        | .     | 2.13 | Ang.         |
|                   |                             |                               |                   | x,y,z =       | 1_555 |      | Check        |
| PLAT432_ALERT_2_G | Short Inter                 | X...Y Contact                 | C27               | ..C27         |       | 3.16 | Ang.         |
|                   |                             |                               |                   | 1-x,1-y,1-z = | 5_666 |      | Check        |
| PLAT802_ALERT_4_G | CIF Input                   | Record(s) with more than 80   | Characters        |               |       | 3    | Info         |
| PLAT860_ALERT_3_G | Number of Least-Squares     | Restraints                    | .....             |               |       | 213  | Note         |
| PLAT912_ALERT_4_G | Missing # of FCF            | Reflections Above STh/L=      | 0.600             |               |       | 1332 | Note         |
| PLAT913_ALERT_3_G | Missing # of Very Strong    | Reflections in FCF            | ....              |               |       | 2    | Note         |
| PLAT933_ALERT_2_G | Number of OMIT              | Records in Embedded .res      | File ...          |               |       | 4    | Note         |
| PLAT941_ALERT_3_G | Average HKL                 | Measurement Multiplicity      | .....             |               |       | 4.8  | Low          |
| PLAT978_ALERT_2_G | Number C-C                  | Bonds with Positive           | Residual Density. |               |       | 0    | Info         |

- 0 **ALERT level A** = Most likely a serious problem - resolve or explain  
 1 **ALERT level B** = A potentially serious problem, consider carefully  
 7 **ALERT level C** = Check. Ensure it is not caused by an omission or oversight  
 18 **ALERT level G** = General information/check it is not something unexpected

1 ALERT type 1 CIF construction/syntax error, inconsistent or missing data

13 ALERT type 2 Indicator that the structure model may be wrong or deficient  
7 ALERT type 3 Indicator that the structure quality may be low  
5 ALERT type 4 Improvement, methodology, query or suggestion  
0 ALERT type 5 Informative message, check

---

It is advisable to attempt to resolve as many as possible of the alerts in all categories. Often the minor alerts point to easily fixed oversights, errors and omissions in your CIF or refinement strategy, so attention to these fine details can be worthwhile. In order to resolve some of the more serious problems it may be necessary to carry out additional measurements or structure refinements. However, the purpose of your study may justify the reported deviations and the more serious of these should normally be commented upon in the discussion or experimental section of a paper or in the "special\_details" fields of the CIF. checkCIF was carefully designed to identify outliers and unusual parameters, but every test has its limitations and alerts that are not important in a particular case may appear. Conversely, the absence of alerts does not guarantee there are no aspects of the results needing attention. It is up to the individual to critically assess their own results and, if necessary, seek expert advice.

### **Publication of your CIF in IUCr journals**

A basic structural check has been run on your CIF. These basic checks will be run on all CIFs submitted for publication in IUCr journals (*Acta Crystallographica*, *Journal of Applied Crystallography*, *Journal of Synchrotron Radiation*); however, if you intend to submit to *Acta Crystallographica Section C* or *E* or *IUCrData*, you should make sure that full publication checks are run on the final version of your CIF prior to submission.

### **Publication of your CIF in other journals**

Please refer to the *Notes for Authors* of the relevant journal for any special instructions relating to CIF submission.

---

**PLATON version of 22/03/2021; check.def file version of 19/03/2021**
