# Supplementary material
Source: MDPI journal article supplement (https://www.mdpi.com/2304-6740/9/5/30)
Supplement: s1 [file s1]

**Synthesis and Characterisation of Molecular Polarised-Covalent Thorium-Rhenium and -Ruthenium Bonds**

Joseph P. A. Ostrowski, Ashley J. Wooles, and Stephen T. Liddle \*

Department of Chemistry, The University of Manchester, Oxford Road, Manchester, M13 9PL, UK.

Emails: joe-ostrowski@outlook.com (J.P.A.O.); ashley.wooles@manchester.ac.uk (A.J.W.)

\* Author to whom correspondence should be addressed; E-mail: steve.liddle@manchester.ac.uk; Tel.: +44-161-275-4612.

***Table S1. Final Coordinates and Energy from a Single Point Energy Calculation on Geometry Optimised ThRe***

|      |           |           |           |
|------|-----------|-----------|-----------|
| 1.C  | 0.032281  | -0.380946 | -6.323796 |
| 2.C  | 2.009360  | 0.944724  | -5.553529 |
| 3.C  | 0.843464  | 0.049305  | -5.079402 |
| 4.C  | -0.853943 | 2.633908  | -4.616031 |
| 5.C  | 1.417250  | -1.215079 | -4.409415 |
| 6.C  | -1.892546 | -0.072726 | -3.639425 |
| 7.C  | 1.453197  | 2.268323  | -2.207499 |
| 8.C  | 2.789770  | 1.648215  | -1.800232 |
| 9.C  | 2.388424  | -3.990776 | -1.573430 |
| 10.C | -0.621390 | -3.691025 | -1.487666 |
| 11.C | -3.585880 | 2.776906  | -0.900957 |
| 12.C | -4.106469 | -0.796322 | -0.694749 |
| 13.C | -2.172114 | 2.792879  | -0.633908 |
| 14.C | 3.269738  | -0.445525 | -0.537550 |
| 15.C | -2.731399 | -1.150933 | -0.445998 |
| 16.C | -4.265199 | 2.849652  | 0.364729  |
| 17.C | -4.731363 | -0.573481 | 0.580739  |
| 18.C | 2.515845  | -1.393494 | 0.394202  |
| 19.C | 0.467028  | -5.951961 | 0.722612  |
| 20.C | 3.131329  | 1.707413  | 0.654617  |
| 21.C | -1.986310 | 2.850344  | 0.796353  |
| 22.C | -2.509824 | -1.120039 | 0.986063  |
| 23.C | 0.881852  | -4.516746 | 1.119069  |
| 24.C | -3.284826 | 2.869847  | 1.416703  |
| 25.C | 1.968090  | 2.414547  | 1.348352  |
| 26.C | -3.750522 | -0.738647 | 1.619051  |
| 27.C | 2.249390  | -4.590057 | 1.835870  |
| 28.C | -0.157861 | -3.950580 | 2.107468  |
| 29.C | -0.748006 | 0.094151  | 3.779357  |
| 30.C | -0.037732 | 3.067452  | 4.077165  |
| 31.C | 2.676396  | -0.495026 | 4.296435  |
| 32.C | 3.283600  | 1.922857  | 4.566440  |
| 33.C | 2.126065  | 0.902185  | 4.648483  |
| 34.C | 1.629481  | 0.867932  | 6.114161  |

|      |           |           |           |
|------|-----------|-----------|-----------|
| 35.H | 0.692042  | -0.892489 | -7.048098 |
| 36.H | -0.417377 | 0.478644  | -6.844731 |
| 37.H | 2.646645  | 0.394848  | -6.269972 |
| 38.H | 1.649837  | 1.850657  | -6.065131 |
| 39.H | -0.776747 | -1.081007 | -6.067761 |
| 40.H | -1.279958 | 2.480648  | -5.620250 |
| 41.H | 2.084732  | -1.755595 | -5.104231 |
| 42.H | 2.659149  | 1.264428  | -4.725032 |
| 43.H | -0.021043 | 3.345254  | -4.722342 |
| 44.H | -2.479953 | -0.030680 | -4.569118 |
| 45.H | -1.625344 | 3.122503  | -4.001419 |
| 46.H | 0.624101  | -1.916198 | -4.109784 |
| 47.H | 1.993192  | -0.973411 | -3.505334 |
| 48.H | -1.681812 | -1.134964 | -3.445236 |
| 49.H | 1.597170  | 2.783459  | -3.173304 |
| 50.H | -2.520836 | 0.310526  | -2.819987 |
| 51.H | 3.088041  | 0.931651  | -2.575864 |
| 52.H | 2.405531  | -3.428322 | -2.520224 |
| 53.H | -0.689253 | -2.985624 | -2.330306 |
| 54.H | 2.251187  | -5.054435 | -1.826678 |
| 55.H | -4.050479 | 2.788334  | -1.881493 |
| 56.H | -0.576923 | -4.700366 | -1.924768 |
| 57.H | 3.581113  | 2.417166  | -1.732334 |
| 58.H | -4.593902 | -0.783644 | -1.663973 |
| 59.H | 3.191966  | -0.837089 | -1.559286 |
| 60.H | 1.210022  | 3.086665  | -1.496874 |
| 61.H | -1.389139 | 2.819410  | -1.389804 |
| 62.H | 3.381919  | -3.896012 | -1.109930 |
| 63.H | -2.049106 | -1.535834 | -1.201430 |
| 64.H | -1.551320 | -3.627247 | -0.906865 |
| 65.H | 4.344337  | -0.396155 | -0.269363 |
| 66.H | 1.180265  | -6.408847 | 0.018672  |
| 67.H | -0.530946 | -5.982551 | 0.260388  |
| 68.H | -5.341982 | 2.870254  | 0.504041  |
| 69.H | 3.915037  | 2.421616  | 0.339344  |
| 70.H | 3.123187  | -2.309083 | 0.475523  |
| 71.H | -5.769910 | -0.292266 | 0.731266  |
| 72.H | 1.543790  | 3.172010  | 0.656343  |
| 73.H | 3.044577  | -4.973107 | 1.177838  |
| 74.H | 0.434470  | -6.598161 | 1.618692  |
| 75.H | 3.581578  | 1.015241  | 1.378789  |
| 76.H | 2.507122  | -0.962288 | 1.408281  |
| 77.H | -1.036205 | 2.935842  | 1.318878  |
| 78.H | -1.632002 | -1.499091 | 1.512222  |
| 79.H | -1.167247 | -3.909855 | 1.671183  |
| 80.H | 2.569210  | -3.611608 | 2.223038  |
| 81.H | 2.373408  | 3.008091  | 2.185273  |
| 82.H | -3.486434 | 2.962760  | 2.478871  |
| 83.H | 2.185223  | -5.274874 | 2.701157  |
| 84.H | -3.928145 | -0.681414 | 2.687636  |

|        |           |           |           |
|--------|-----------|-----------|-----------|
| 85.H   | 0.113580  | -2.933538 | 2.428670  |
| 86.H   | -0.217546 | -4.580513 | 3.013217  |
| 87.H   | -1.628702 | 0.343893  | 3.166959  |
| 88.H   | 3.085757  | -0.529430 | 3.276760  |
| 89.H   | -0.429304 | -0.929954 | 3.531713  |
| 90.H   | 3.770301  | 1.924231  | 3.579569  |
| 91.H   | -0.968061 | 3.319150  | 3.547292  |
| 92.H   | 0.676412  | 3.883201  | 3.886320  |
| 93.H   | 1.906401  | -1.276885 | 4.373009  |
| 94.H   | 2.951193  | 2.949901  | 4.782746  |
| 95.H   | -1.061886 | 0.087114  | 4.833746  |
| 96.H   | 3.493385  | -0.771248 | 4.987230  |
| 97.H   | -0.262240 | 3.073523  | 5.155139  |
| 98.H   | 4.064078  | 1.671062  | 5.307646  |
| 99.H   | 0.821225  | 0.136758  | 6.264531  |
| 100.H  | 1.265471  | 1.849392  | 6.453119  |
| 101.H  | 2.460359  | 0.578935  | 6.782956  |
| 102.N  | 0.377407  | 1.256078  | -2.246965 |
| 103.N  | 2.657412  | 0.912038  | -0.514199 |
| 104.N  | 1.124023  | -1.679397 | -0.076770 |
| 105.N  | 0.952266  | 1.429567  | 1.772264  |
| 106.Re | -3.108109 | 0.935259  | 0.290678  |
| 107.Si | -0.329317 | 0.977069  | -3.831969 |
| 108.Si | 0.950734  | -3.390841 | -0.469502 |
| 109.Si | 0.617250  | 1.373556  | 3.498442  |
| 110.Th | -0.053048 | 0.375202  | -0.091063 |

Energy: -613.11853305 eV

**Table S2. Final Coordinates and Energy from a Single Point Energy Calculation on Geometry Optimised ThRu**

|      |           |           |           |
|------|-----------|-----------|-----------|
| 1.C  | 2.583221  | 3.760416  | -4.198654 |
| 2.C  | -0.545813 | 0.054100  | -3.625527 |
| 3.C  | 3.202208  | 0.576267  | -3.512743 |
| 4.C  | -0.067627 | 1.418529  | -3.140638 |
| 5.C  | 2.756155  | 3.537007  | -2.678453 |
| 6.C  | -1.209969 | -2.100828 | -2.616286 |
| 7.C  | 4.214172  | 3.904623  | -2.312388 |
| 8.C  | -2.703659 | -0.117886 | -2.452141 |
| 9.C  | 0.164250  | -2.609158 | -2.177688 |
| 10.C | 1.802755  | 4.485030  | -1.925631 |
| 11.C | 3.025377  | -4.589895 | -1.893286 |
| 12.C | -2.892083 | 0.619212  | -1.119361 |
| 13.C | 3.930840  | -2.616502 | -0.631154 |
| 14.C | -4.709547 | -2.130077 | -0.391899 |
| 15.C | 3.089918  | -3.902357 | -0.511035 |
| 16.C | 3.358374  | 1.318102  | -0.555280 |
| 17.C | 0.284763  | -5.059347 | 0.172445  |
| 18.C | 3.785814  | -4.865336 | 0.477438  |
| 19.C | -0.167359 | 3.293653  | 0.980101  |
| 20.C | -5.344785 | 0.954218  | 1.429687  |

|      |           |           |           |
|------|-----------|-----------|-----------|
| 21.C | -1.334873 | 2.941368  | 1.717118  |
| 22.C | -2.584225 | -2.559037 | 1.759736  |
| 23.C | 0.803333  | 3.782680  | 1.920717  |
| 24.C | 1.465553  | -2.810465 | 1.916842  |
| 25.C | -4.684406 | -0.270855 | 2.098392  |
| 26.C | -5.794712 | -1.203384 | 2.632624  |
| 27.C | 2.125815  | 0.828288  | 2.569910  |
| 28.C | -1.089751 | 3.233255  | 3.104039  |
| 29.C | 0.215202  | 3.785142  | 3.225322  |
| 30.C | -3.829463 | 0.212902  | 3.286767  |
| 31.C | -0.179086 | 0.089953  | 3.444487  |
| 32.H | 3.250992  | 3.116279  | -4.790259 |
| 33.H | 2.826843  | 4.807733  | -4.453732 |
| 34.H | 1.552480  | 3.579745  | -4.539042 |
| 35.H | -1.160819 | 0.131334  | -4.544334 |
| 36.H | 2.670545  | 0.639671  | -4.474722 |
| 37.H | 0.489722  | 1.888910  | -3.968793 |
| 38.H | 0.338472  | -0.552927 | -3.859280 |
| 39.H | 4.251780  | 0.852895  | -3.704053 |
| 40.H | -1.449538 | -2.462845 | -3.636957 |
| 41.H | 3.193461  | -0.477222 | -3.193382 |
| 42.H | -2.924965 | 0.545835  | -3.304389 |
| 43.H | -0.939435 | 2.079493  | -2.973362 |
| 44.H | 4.435927  | 4.936164  | -2.640561 |
| 45.H | 0.929766  | -2.271464 | -2.900110 |
| 46.H | 4.946760  | 3.243404  | -2.802464 |
| 47.H | 2.596813  | -3.934377 | -2.665399 |
| 48.H | 2.015460  | 5.536640  | -2.189132 |
| 49.H | -3.396318 | -0.967713 | -2.505342 |
| 50.H | 4.042867  | -4.863571 | -2.227325 |
| 51.H | 0.749300  | 4.288447  | -2.175211 |
| 52.H | 0.127555  | -3.707167 | -2.288261 |
| 53.H | 2.431407  | -5.516532 | -1.868128 |
| 54.H | -1.961507 | -2.502682 | -1.925351 |
| 55.H | 4.394173  | 3.858486  | -1.227801 |
| 56.H | 3.475218  | -1.901140 | -1.331467 |
| 57.H | -4.134490 | -2.763918 | -1.084948 |
| 58.H | 1.909176  | 4.395624  | -0.835124 |
| 59.H | -5.325449 | -1.444802 | -0.995603 |
| 60.H | 4.944630  | -2.847686 | -1.004699 |
| 61.H | -2.323919 | 1.577528  | -1.182962 |
| 62.H | -3.941470 | 0.943052  | -1.016435 |
| 63.H | 0.101774  | -5.471140 | -0.831704 |
| 64.H | 4.444200  | 1.395401  | -0.717201 |
| 65.H | 3.185782  | 0.290712  | -0.195134 |
| 66.H | -5.401061 | -2.793820 | 0.150153  |
| 67.H | 4.794150  | -5.122915 | 0.105790  |
| 68.H | -0.041311 | 3.254597  | -0.098852 |
| 69.H | 3.094206  | 2.003649  | 0.260868  |
| 70.H | 4.049435  | -2.109379 | 0.338495  |

|        |           |           |           |
|--------|-----------|-----------|-----------|
| 71.H   | 3.232379  | -5.809922 | 0.595741  |
| 72.H   | -5.965376 | 0.674885  | 0.563688  |
| 73.H   | -0.693763 | -4.889322 | 0.646155  |
| 74.H   | 0.798345  | -5.841920 | 0.753048  |
| 75.H   | -4.596798 | 1.687478  | 1.092322  |
| 76.H   | -1.944536 | -3.113799 | 1.057583  |
| 77.H   | 3.909920  | -4.417918 | 1.475089  |
| 78.H   | -2.264413 | 2.558007  | 1.305954  |
| 79.H   | -6.494966 | -1.511169 | 1.841058  |
| 80.H   | 1.793425  | 4.156456  | 1.675276  |
| 81.H   | -6.004770 | 1.471340  | 2.149364  |
| 82.H   | 2.111972  | -1.924769 | 2.010667  |
| 83.H   | -3.265130 | -3.285925 | 2.227995  |
| 84.H   | 0.484805  | -2.568655 | 2.353450  |
| 85.H   | 1.906148  | -3.584278 | 2.564457  |
| 86.H   | -1.947528 | -2.151660 | 2.557610  |
| 87.H   | -5.383891 | -2.115214 | 3.094182  |
| 88.H   | -6.384606 | -0.683464 | 3.408950  |
| 89.H   | -2.983405 | 0.831313  | 2.956233  |
| 90.H   | -1.797414 | 3.085591  | 3.914602  |
| 91.H   | -3.415717 | -0.626244 | 3.863794  |
| 92.H   | -4.442758 | 0.818376  | 3.978599  |
| 93.H   | 0.686779  | 4.126714  | 4.141634  |
| 94.N   | -1.300873 | -0.619522 | -2.543153 |
| 95.N   | 0.741546  | 1.272567  | -1.909319 |
| 96.N   | 0.513967  | -2.204949 | -0.794441 |
| 97.N   | -2.411757 | -0.192886 | 0.010133  |
| 98.O   | 3.206538  | 0.383990  | 2.716894  |
| 99.O   | -0.525495 | -0.796385 | 4.138187  |
| 100.Ru | 0.416262  | 1.560299  | 2.466006  |
| 101.Si | 2.437931  | 1.683577  | -2.164597 |
| 102.Si | 1.319296  | -3.461305 | 0.148174  |
| 103.Si | -3.565305 | -1.229783 | 0.842122  |
| 104.Th | -0.103312 | -0.048547 | -0.149004 |

Energy: -581.99703677 eV
