# Supplementary material
Source: MDPI journal article supplement (https://www.mdpi.com/2304-6740/9/5/30)
Supplement: s1 [file s1]

Archive with 6 entries (6 files):
- Combined cif.cif
- __MACOSX/._Combined cif.cif
- ThReRu_Supp_Mat.pdf
- __MACOSX/._ThReRu_Supp_Mat.pdf
- checkcif.pdf
- __MACOSX/._checkcif.pdf
