# Supplementary material
Source: MDPI journal article supplement (https://www.mdpi.com/2304-6740/9/5/30)
Supplement: s1 [file s1 › Combined cif.cif]

data_ThRe
_manchester_internal_diff_code     RSTL173
_manchester_internal_STL_name      THJO9
_manchester_internal_coll_client   JO
_manchester_internal_coll_date     25/04/2018
_manchester_internal_process_date  25/04/2018
_manchester_internal_process_user  JO
_manchester_internal_solution_date  25/04/2018
_manchester_internal_solution_user  JO
_manchester_internal_refinement_date  25/04/2018
_manchester_internal_refinement_user  JO
_manchester_internal_validation_date  25/04/2018
_manchester_internal_validation_user  JO
_manchester_internal_archive_date  26/04/2018
_manchester_internal_archive_user  AW
_refine_special_details            ?
_vrf_PLAT971_ThRe
;
PROBLEM: Check Calcd Resid. Dens.  1.16A   From Th2             4.40 eA-3  
RESPONSE: Residual density is close to thorium and is present
despite applying the correct absorption correction. It is 
of no chemical significance.
;
_audit_creation_date               2018-04-26
_audit_creation_method
;
Olex2 1.2
(compiled 2018.04.18 svn.r3501 for OlexSys, GUI svn.r5488)
;
_shelx_SHELXL_version_number       '2018/3'
_publ_contact_author_id_orcid      ?
_publ_section_references
;
Dolomanov, O.V., Bourhis, L.J., Gildea, R.J, Howard, J.A.K. & Puschmann, H.
 (2009), J. Appl. Cryst. 42, 339-341.

Sheldrick, G.M. (2015). Acta Cryst. A71, 3-8.

Sheldrick, G.M. (2015). Acta Cryst. C71, 3-8.
;
_chemical_name_common              ?
_chemical_name_systematic          ?
_chemical_formula_moiety           'C34 H67 N4 Re Si3 Th'
_chemical_formula_sum              'C34 H67 N4 Re Si3 Th'
_chemical_formula_weight           1034.42
_chemical_melting_point            ?
_chemical_oxdiff_formula           'C100 H100 Th Si3 N4 Re'
loop_
  _atom_type_symbol
  _atom_type_description
  _atom_type_scat_dispersion_real
  _atom_type_scat_dispersion_imag
  _atom_type_scat_source
 'C' 'C' 0.0181 0.0091 'International Tables Vol C Tables 4.2.6.8 and 6.1.1.4'
 'H' 'H' 0.0000 0.0000 'International Tables Vol C Tables 4.2.6.8 and 6.1.1.4'
 'N' 'N' 0.0311 0.0180 'International Tables Vol C Tables 4.2.6.8 and 6.1.1.4'
 'Re' 'Re' -5.2083 5.8923
 'International Tables Vol C Tables 4.2.6.8 and 6.1.1.4'
 'Si' 'Si' 0.2541 0.3302 'International Tables Vol C Tables 4.2.6.8 and 6.1.1.4'
 'Th' 'Th' -4.1491 12.3296
 'International Tables Vol C Tables 4.2.6.8 and 6.1.1.4'

_shelx_space_group_comment
;
The symmetry employed for this shelxl refinement is uniquely defined
by the following loop, which should always be used as a source of
symmetry information in preference to the above space-group names.
They are only intended as comments.
;
_space_group_crystal_system        'monoclinic'
_space_group_IT_number             14
_space_group_name_H-M_alt          'P 1 21/c 1'
_space_group_name_Hall             '-P 2ybc'
loop_
  _space_group_symop_operation_xyz
 'x, y, z'
 '-x, y+1/2, -z+1/2'
 '-x, -y, -z'
 'x, -y-1/2, z-1/2'

_cell_length_a                     26.6348(2)
_cell_length_b                     15.80170(10)
_cell_length_c                     20.04420(10)
_cell_angle_alpha                  90
_cell_angle_beta                   108.3070(10)
_cell_angle_gamma                  90
_cell_volume                       8009.13(10)
_cell_formula_units_Z              8
_cell_measurement_reflns_used      30861
_cell_measurement_temperature      150(2)
_cell_measurement_theta_max        76.4280
_cell_measurement_theta_min        1.7310
_shelx_estimated_absorpt_T_max     0.326
_shelx_estimated_absorpt_T_min     0.166
_exptl_absorpt_coefficient_mu      18.769
_exptl_absorpt_correction_T_max    1.000
_exptl_absorpt_correction_T_min    0.758
_exptl_absorpt_correction_type     gaussian
_exptl_absorpt_process_details
;
CrysAlisPro 1.171.39.27b (Rigaku Oxford Diffraction, 2015)
Numerical absorption correction based on gaussian integration over
			a multifaceted crystal model
Empirical absorption correction using spherical harmonics,
 implemented in SCALE3 ABSPACK scaling algorithm.
;
_exptl_absorpt_special_details     ?
_exptl_crystal_colour              'clear light colourless'
_exptl_crystal_colour_lustre       clear
_exptl_crystal_colour_modifier     light
_exptl_crystal_colour_primary      colourless
_exptl_crystal_density_diffrn      1.716
_exptl_crystal_density_meas        ?
_exptl_crystal_density_method      ?
_exptl_crystal_description         plate
_exptl_crystal_F_000               4048
loop_
  _exptl_crystal_face_index_h
  _exptl_crystal_face_index_k
  _exptl_crystal_face_index_l
  _exptl_crystal_face_perp_dist
 -9 -9 3 0.0371
 10 -2 7 0.0550
 13 5 2 0.0664
 10 9 -2 0.0729
 -5 6 -8 0.0559
 10 -1 7 0.0534
 14 -6 -6 0.0355
 15 -3 -7 0.0349
 -12 3 11 0.0418
 -14 6 7 0.0398
 -17 2 5 0.0398
 -8 8 7 0.0507
 4 -6 8 0.0576
 4 -3 -12 0.0692

_exptl_crystal_size_max            0.149
_exptl_crystal_size_mid            0.123
_exptl_crystal_size_min            0.077
loop_
  _exptl_oxdiff_crystal_face_indexfrac_h
  _exptl_oxdiff_crystal_face_indexfrac_k
  _exptl_oxdiff_crystal_face_indexfrac_l
  _exptl_oxdiff_crystal_face_x
  _exptl_oxdiff_crystal_face_y
  _exptl_oxdiff_crystal_face_z
 -9.0444 -8.9824 3.0597 -0.6619 0.6468 0.4353
 10.0301 -2.0119 6.9645 0.3224 -0.3552 0.8465
 13.0482 4.9792 1.9354 0.6532 -0.7022 0.2239
 10.0504 8.9814 -2.0646 0.7244 -0.6797 -0.3439
 -5.0081 6.0026 -7.9947 0.0013 0.0226 -0.9894
 10.0366 -1.0119 6.9604 0.3994 -0.3697 0.7884
 13.9319 -6.0286 -6.0077 -0.5767 -0.7412 0.4013
 14.9460 -3.0311 -7.0214 -0.3821 -0.8543 0.1960
 -11.9223 3.0289 11.0048 0.6190 0.7739 0.1397
 -13.9262 6.0294 7.0059 0.6261 0.7596 -0.3400
 -16.9645 2.0330 5.0353 0.1801 0.9346 -0.3209
 -7.9112 8.0191 6.9790 0.8582 0.4230 -0.2754
 4.0078 -6.0009 7.9978 -0.0143 0.0287 0.9593
 3.9139 -3.0159 -11.9781 -0.7726 -0.3821 -0.4418

_exptl_transmission_factor_max     ?
_exptl_transmission_factor_min     ?
_diffrn_reflns_av_R_equivalents    0.0303
_diffrn_reflns_av_unetI/netI       0.0316
_diffrn_reflns_Laue_measured_fraction_full  0.996
_diffrn_reflns_Laue_measured_fraction_max  0.972
_diffrn_reflns_limit_h_max         33
_diffrn_reflns_limit_h_min         -33
_diffrn_reflns_limit_k_max         17
_diffrn_reflns_limit_k_min         -19
_diffrn_reflns_limit_l_max         25
_diffrn_reflns_limit_l_min         -25
_diffrn_reflns_number              55127
_diffrn_reflns_point_group_measured_fraction_full  0.996
_diffrn_reflns_point_group_measured_fraction_max  0.972
_diffrn_reflns_theta_full          67.684
_diffrn_reflns_theta_max           77.107
_diffrn_reflns_theta_min           1.747
_diffrn_ambient_environment        N~2~
_diffrn_ambient_temperature        150(2)
_diffrn_detector                   'CCD plate'
_diffrn_detector_area_resol_mean   ?
_diffrn_measured_fraction_theta_full  0.996
_diffrn_measured_fraction_theta_max  0.972
_diffrn_measurement_details
;
List of Runs (angles in degrees, time in seconds):

  # Type    Start    End  Width  t~exp~   \w     \q     \k     \f   Frames
--------------------------------------------------------------------------
  1  \w    -45.00 -20.00   1.00    1.00    --    5.00 -72.00 -75.00   25
  2  \w   -111.00 -24.00   1.00    1.00    --  -45.00 -72.00 -75.00   87
  3  \w    -75.00  22.00   1.00    1.00    --  -45.00  72.00  54.00   97
  4  \w   -198.00 -96.00   1.00    1.00    -- -110.00 -72.00 -75.00  102
  5  \w   -147.00 -82.00   1.00    1.00    -- -110.00  72.00  54.00   65
  6  \w    -60.00   9.00   1.00    1.00    --  -45.00  57.00-150.00   69
  7  \w   -198.00-138.00   1.00    1.00    -- -110.00 -57.00-150.00   60
  8  \w    -51.00 -22.00   1.00    1.00    -- -110.00  19.00 -30.00   29
  9  \w   -121.00 -95.00   1.00    1.00    -- -110.00 -57.00  30.00   26
 10  \w   -133.00 -22.00   1.00    1.00    -- -110.00  57.00-150.00  111
 11  \w   -173.00-118.00   1.00    1.00    -- -110.00  19.00 -30.00   55
 12  \w   -121.00 -90.00   1.00    1.00    -- -110.00 -57.00-150.00   31
 13  \w   -199.00 -77.00   1.00    1.00    -- -110.00 -57.00-120.00  122
 14  \w   -142.00 -99.00   1.00    1.00    -- -110.00  57.00 120.00   43
 15  \w    -87.00 -62.00   1.00    1.00    -- -110.00  57.00 120.00   25
 16  \w   -109.00 -36.00   1.00    1.00    -- -110.00  76.00 -90.00   73
 17  \w   -149.00-122.00   1.00    1.00    -- -110.00  76.00  90.00   27
 18  \w    -79.00 -33.00   1.00    1.00    -- -110.00  76.00-120.00   46
;
_diffrn_measurement_device         'four-circle diffractometer'
_diffrn_measurement_device_type    'XtaLAB AFC11 (RINC): Kappa single'
_diffrn_measurement_method         '\w scans'
_diffrn_orient_matrix_type        
 'CrysAlisPro convention (1999,Acta A55,543-557)'
_diffrn_orient_matrix_UB_11        0.0132975000
_diffrn_orient_matrix_UB_12        0.0771334000
_diffrn_orient_matrix_UB_13        0.0494212000
_diffrn_orient_matrix_UB_21        -0.0512244000
_diffrn_orient_matrix_UB_22        -0.0140602000
_diffrn_orient_matrix_UB_23        0.0187022000
_diffrn_orient_matrix_UB_31        0.0301770000
_diffrn_orient_matrix_UB_32        -0.0579554000
_diffrn_orient_matrix_UB_33        0.0613359000
_diffrn_radiation_monochromator    mirror
_diffrn_radiation_probe            x-ray
_diffrn_radiation_type             CuK\a
_diffrn_radiation_wavelength       1.54184
_diffrn_source                     'Rotating-anode X-ray tube (dual wavelength)'
_diffrn_source_type                'Rigaku (Cu) X-ray DW Source'
_reflns_Friedel_coverage           0.000
_reflns_Friedel_fraction_full      .
_reflns_Friedel_fraction_max       .
_reflns_number_gt                  15534
_reflns_number_total               16480
_reflns_odcompleteness_completeness  99.63
_reflns_odcompleteness_iscentric   1
_reflns_odcompleteness_theta       68.13
_reflns_special_details
;
 Reflections were merged by SHELXL according to the crystal
 class for the calculation of statistics and refinement.
 
 _reflns_Friedel_fraction is defined as the number of unique
 Friedel pairs measured divided by the number that would be
 possible theoretically, ignoring centric projections and
 systematic absences.
;
_reflns_threshold_expression       'I > 2\s(I)'
_computing_cell_refinement         'CrysAlisPro 1.171.39.46 (Rigaku OD, 2018)'
_computing_data_collection         'CrysAlisPro 1.171.39.46 (Rigaku OD, 2018)'
_computing_data_reduction          'CrysAlisPro 1.171.39.46 (Rigaku OD, 2018)'
_computing_molecular_graphics      'Olex2 (Dolomanov et al., 2009)'
_computing_publication_material    'Olex2 (Dolomanov et al., 2009)'
_computing_structure_refinement    'ShelXL (Sheldrick, 2015)'
_computing_structure_solution      'ShelXT (Sheldrick, 2015)'
_refine_diff_density_max           4.780
_refine_diff_density_min           -1.899
_refine_diff_density_rms           0.135
_refine_ls_extinction_coef         .
_refine_ls_extinction_method       none
_refine_ls_goodness_of_fit_ref     1.058
_refine_ls_hydrogen_treatment      constr
_refine_ls_matrix_type             full
_refine_ls_number_parameters       805
_refine_ls_number_reflns           16480
_refine_ls_number_restraints       0
_refine_ls_R_factor_all            0.0330
_refine_ls_R_factor_gt             0.0307
_refine_ls_restrained_S_all        1.058
_refine_ls_shift/su_max            0.002
_refine_ls_shift/su_mean           0.000
_refine_ls_structure_factor_coef   Fsqd
_refine_ls_weighting_details      
 'w=1/[\s^2^(Fo^2^)+(0.0386P)^2^+26.3526P] where P=(Fo^2^+2Fc^2^)/3'
_refine_ls_weighting_scheme        calc
_refine_ls_wR_factor_gt            0.0778
_refine_ls_wR_factor_ref           0.0791
_olex2_refinement_description
;
1. Fixed Uiso
 At 1.2 times of:
  All C(H) groups, All C(H,H) groups
 At 1.5 times of:
  All C(H,H,H) groups
2.a Secondary CH2 refined with riding coordinates:
 C1(H1A,H1B), C2(H2A,H2B), C3(H3A,H3B), C4(H4A,H4B), C5(H5A,H5B), C6(H6A,H6B),
 C35(H25A,H25B), C36(H26A,H26B), C37(H27A,H27B), C38(H28A,H28B), C39(H29A,H29B),
  C40(H30A,H30B)
2.b Aromatic/amide H refined with riding coordinates:
 C31(H49), C32(H50), C33(H51), C30(H52), C34(H53), C29(H54), C28(H55),
 C27(H56), C26(H57), C25(H58), C59(H59), C63(H60), C62(H61), C61(H62), C60(H63),
  C68(H64), C67(H65), C66(H66), C65(H67), C64(H68)
2.c Idealised Me refined as rotating group:
 C7(H7A,H7B,H7C), C8(H8A,H8B,H8C), C10(H10A,H10B,H10C), C11(H11A,H11B,H11C),
 C12(H12A,H12B,H12C), C13(H13A,H13B,H13C), C14(H14A,H14B,H14C), C16(H16A,H16B,
 H16C), C17(H17A,H17B,H17C), C18(H18A,H18B,H18C), C19(H19A,H19B,H19C), C20(H20A,
 H20B,H20C), C22(H22A,H22B,H22C), C23(H23A,H23B,H23C), C24(H24A,H24B,H24C),
 C41(H31A,H31B,H31C), C42(H32A,H32B,H32C), C45(H34A,H34B,H34C), C44(H35A,H35B,
 H35C), C46(H36A,H36B,H36C), C48(H37A,H37B,H37C), C47(H38A,H38B,H38C), C52(H40A,
 H40B,H40C), C51(H41A,H41B,H41C), C50(H42A,H42B,H42C), C54(H43A,H43B,H43C),
 C53(H44A,H44B,H44C), C57(H46A,H46B,H46C), C58(H47A,H47B,H47C), C56(H48A,H48B,
 H48C)
;
_atom_sites_solution_hydrogens     geom
_atom_sites_solution_primary       dual
_atom_sites_solution_secondary     difmap
loop_
  _atom_site_label
  _atom_site_type_symbol
  _atom_site_fract_x
  _atom_site_fract_y
  _atom_site_fract_z
  _atom_site_U_iso_or_equiv
  _atom_site_adp_type
  _atom_site_occupancy
  _atom_site_site_symmetry_order
  _atom_site_calc_flag
  _atom_site_refinement_flags_posn
  _atom_site_refinement_flags_adp
  _atom_site_refinement_flags_occupancy
  _atom_site_disorder_assembly
  _atom_site_disorder_group
 Th1 Th 0.08198(2) 0.69644(2) 0.34771(2) 0.02197(5) Uani 1 1 d . . . . .
 Re1 Re 0.11509(2) 0.55528(2) 0.46138(2) 0.02629(5) Uani 1 1 d . . . . .
 Si1 Si -0.05568(5) 0.68838(9) 0.35608(7) 0.0286(3) Uani 1 1 d . . . . .
 Si2 Si 0.13565(5) 0.91973(8) 0.40743(7) 0.0267(2) Uani 1 1 d . . . . .
 Si3 Si 0.19408(5) 0.63237(9) 0.28339(7) 0.0287(3) Uani 1 1 d . . . . .
 N1 N 0.03890(16) 0.7617(3) 0.2166(2) 0.0293(8) Uani 1 1 d . . . . .
 N2 N -0.00957(15) 0.6897(3) 0.3111(2) 0.0264(8) Uani 1 1 d . . . . .
 N3 N 0.09351(16) 0.8434(3) 0.3583(2) 0.0284(8) Uani 1 1 d . . . . .
 N4 N 0.12846(15) 0.6547(3) 0.2722(2) 0.0271(8) Uani 1 1 d . . . . .
 C1 C -0.01880(19) 0.7464(4) 0.1946(3) 0.0329(11) Uani 1 1 d . . . . .
 H1A H -0.031950 0.734140 0.143659 0.039 Uiso 1 1 calc R . . . .
 H1B H -0.037081 0.797736 0.203527 0.039 Uiso 1 1 calc R . . . .
 C2 C -0.0309(2) 0.6722(4) 0.2353(3) 0.0333(11) Uani 1 1 d . . . . .
 H2A H -0.069584 0.663439 0.221875 0.040 Uiso 1 1 calc R . . . .
 H2B H -0.014652 0.619984 0.224029 0.040 Uiso 1 1 calc R . . . .
 C3 C 0.0524(2) 0.8521(3) 0.2268(3) 0.0350(11) Uani 1 1 d . . . . .
 H3A H 0.026981 0.885583 0.189328 0.042 Uiso 1 1 calc R . . . .
 H3B H 0.088210 0.861583 0.223325 0.042 Uiso 1 1 calc R . . . .
 C4 C 0.0506(2) 0.8817(3) 0.2986(3) 0.0341(11) Uani 1 1 d . . . . .
 H4A H 0.053974 0.944138 0.301329 0.041 Uiso 1 1 calc R . . . .
 H4B H 0.015845 0.866682 0.303556 0.041 Uiso 1 1 calc R . . . .
 C5 C 0.0642(2) 0.7189(4) 0.1685(3) 0.0384(12) Uani 1 1 d . . . . .
 H5A H 0.090610 0.757235 0.159110 0.046 Uiso 1 1 calc R . . . .
 H5B H 0.036996 0.705895 0.123176 0.046 Uiso 1 1 calc R . . . .
 C6 C 0.0909(2) 0.6384(4) 0.2012(3) 0.0353(11) Uani 1 1 d . . . . .
 H6A H 0.063837 0.597178 0.204707 0.042 Uiso 1 1 calc R . . . .
 H6B H 0.110135 0.613547 0.170993 0.042 Uiso 1 1 calc R . . . .
 C7 C -0.0186(2) 0.7091(4) 0.4508(3) 0.0409(13) Uani 1 1 d . . . . .
 H7A H 0.007208 0.663836 0.468892 0.061 Uiso 1 1 calc GR . . . .
 H7B H -0.043523 0.710810 0.477836 0.061 Uiso 1 1 calc GR . . . .
 H7C H -0.000214 0.763498 0.455121 0.061 Uiso 1 1 calc GR . . . .
 C8 C -0.0881(2) 0.5820(4) 0.3499(3) 0.0451(14) Uani 1 1 d . . . . .
 H8A H -0.106496 0.568658 0.300523 0.068 Uiso 1 1 calc GR . . . .
 H8B H -0.113569 0.582924 0.376110 0.068 Uiso 1 1 calc GR . . . .
 H8C H -0.061110 0.538877 0.369914 0.068 Uiso 1 1 calc GR . . . .
 C9 C -0.1107(2) 0.7707(4) 0.3270(3) 0.0419(13) Uani 1 1 d . . . . .
 C10 C -0.0870(3) 0.8608(4) 0.3383(4) 0.0573(17) Uani 1 1 d . . . . .
 H10A H -0.064514 0.867040 0.387234 0.086 Uiso 1 1 calc GR . . . .
 H10B H -0.115715 0.902451 0.328141 0.086 Uiso 1 1 calc GR . . . .
 H10C H -0.065873 0.870074 0.306881 0.086 Uiso 1 1 calc GR . . . .
 C11 C -0.1445(3) 0.7619(6) 0.2493(4) 0.068(2) Uani 1 1 d . . . . .
 H11A H -0.122428 0.772588 0.219171 0.103 Uiso 1 1 calc GR . . . .
 H11B H -0.173505 0.802989 0.238448 0.103 Uiso 1 1 calc GR . . . .
 H11C H -0.159055 0.704502 0.240739 0.103 Uiso 1 1 calc GR . . . .
 C12 C -0.1475(2) 0.7607(5) 0.3720(4) 0.0526(16) Uani 1 1 d . . . . .
 H12A H -0.163789 0.704437 0.364275 0.079 Uiso 1 1 calc GR . . . .
 H12B H -0.175220 0.804042 0.358650 0.079 Uiso 1 1 calc GR . . . .
 H12C H -0.127084 0.767294 0.421725 0.079 Uiso 1 1 calc GR . . . .
 C13 C 0.1996(2) 0.8719(3) 0.4641(3) 0.0388(12) Uani 1 1 d . . . . .
 H13A H 0.193377 0.840880 0.503111 0.058 Uiso 1 1 calc GR . . . .
 H13B H 0.225518 0.916918 0.482804 0.058 Uiso 1 1 calc GR . . . .
 H13C H 0.213272 0.832892 0.435885 0.058 Uiso 1 1 calc GR . . . .
 C14 C 0.1548(2) 0.9980(4) 0.3489(3) 0.0387(12) Uani 1 1 d . . . . .
 H14A H 0.168879 0.967685 0.316019 0.058 Uiso 1 1 calc GR . . . .
 H14B H 0.181789 1.036531 0.377653 0.058 Uiso 1 1 calc GR . . . .
 H14C H 0.123556 1.030648 0.322427 0.058 Uiso 1 1 calc GR . . . .
 C15 C 0.1060(2) 0.9817(4) 0.4681(3) 0.0364(11) Uani 1 1 d . . . . .
 C16 C 0.1503(4) 1.0325(6) 0.5209(5) 0.075(2) Uani 1 1 d . . . . .
 H16A H 0.177843 0.993685 0.548071 0.112 Uiso 1 1 calc GR . . . .
 H16B H 0.135622 1.063551 0.552896 0.112 Uiso 1 1 calc GR . . . .
 H16C H 0.165588 1.072685 0.495450 0.112 Uiso 1 1 calc GR . . . .
 C17 C 0.0622(4) 1.0404(6) 0.4287(4) 0.080(3) Uani 1 1 d . . . . .
 H17A H 0.075563 1.079808 0.400434 0.120 Uiso 1 1 calc GR . . . .
 H17B H 0.049624 1.072396 0.462198 0.120 Uiso 1 1 calc GR . . . .
 H17C H 0.032985 1.007368 0.397757 0.120 Uiso 1 1 calc GR . . . .
 C18 C 0.0837(3) 0.9211(4) 0.5108(3) 0.0512(16) Uani 1 1 d . . . . .
 H18A H 0.055765 0.886616 0.478936 0.077 Uiso 1 1 calc GR . . . .
 H18B H 0.069082 0.953516 0.542032 0.077 Uiso 1 1 calc GR . . . .
 H18C H 0.112038 0.884104 0.538903 0.077 Uiso 1 1 calc GR . . . .
 C19 C 0.2029(3) 0.5253(4) 0.2469(4) 0.0484(14) Uani 1 1 d . . . . .
 H19A H 0.190622 0.481125 0.272360 0.073 Uiso 1 1 calc GR . . . .
 H19B H 0.240422 0.516271 0.252404 0.073 Uiso 1 1 calc GR . . . .
 H19C H 0.182328 0.522863 0.196910 0.073 Uiso 1 1 calc GR . . . .
 C20 C 0.2316(2) 0.6280(5) 0.3796(3) 0.0461(14) Uani 1 1 d . . . . .
 H20A H 0.235440 0.685372 0.399220 0.069 Uiso 1 1 calc GR . . . .
 H20B H 0.266746 0.603751 0.386319 0.069 Uiso 1 1 calc GR . . . .
 H20C H 0.212397 0.592736 0.403609 0.069 Uiso 1 1 calc GR . . . .
 C21 C 0.2271(2) 0.7145(4) 0.2417(3) 0.0343(11) Uani 1 1 d . . . . .
 C22 C 0.2875(2) 0.7016(4) 0.2678(3) 0.0460(14) Uani 1 1 d . . . . .
 H22A H 0.301045 0.713117 0.318355 0.069 Uiso 1 1 calc GR . . . .
 H22B H 0.304044 0.740331 0.242796 0.069 Uiso 1 1 calc GR . . . .
 H22C H 0.295727 0.643047 0.258881 0.069 Uiso 1 1 calc GR . . . .
 C23 C 0.2086(2) 0.7078(4) 0.1616(3) 0.0423(13) Uani 1 1 d . . . . .
 H23A H 0.216649 0.651179 0.147777 0.063 Uiso 1 1 calc GR . . . .
 H23B H 0.226936 0.750318 0.142187 0.063 Uiso 1 1 calc GR . . . .
 H23C H 0.170388 0.717610 0.143496 0.063 Uiso 1 1 calc GR . . . .
 C24 C 0.2144(3) 0.8025(4) 0.2621(4) 0.0490(15) Uani 1 1 d . . . . .
 H24A H 0.175913 0.809344 0.249039 0.073 Uiso 1 1 calc GR . . . .
 H24B H 0.228869 0.844863 0.237565 0.073 Uiso 1 1 calc GR . . . .
 H24C H 0.230041 0.810000 0.313000 0.073 Uiso 1 1 calc GR . . . .
 C49 C 0.1294(2) 0.4404(3) 0.4058(3) 0.0380(12) Uani 1 1 d . . . . .
 H49 H 0.163931 0.423216 0.407372 0.046 Uiso 1 1 calc R . . . .
 C50 C 0.0948(2) 0.4946(3) 0.3549(3) 0.0335(11) Uani 1 1 d . . . . .
 H50 H 0.102300 0.519402 0.315855 0.040 Uiso 1 1 calc R . . . .
 C51 C 0.0471(2) 0.5055(3) 0.3722(3) 0.0365(12) Uani 1 1 d . . . . .
 H51 H 0.017399 0.538783 0.347171 0.044 Uiso 1 1 calc R . . . .
 C52 C 0.1023(2) 0.4172(3) 0.4534(3) 0.0374(12) Uani 1 1 d . . . . .
 H52 H 0.115743 0.380350 0.492357 0.045 Uiso 1 1 calc R . . . .
 C53 C 0.0524(2) 0.4567(3) 0.4345(3) 0.0364(12) Uani 1 1 d . . . . .
 H53 H 0.026959 0.451920 0.458496 0.044 Uiso 1 1 calc R . . . .
 C54 C 0.1610(2) 0.5719(4) 0.5736(2) 0.0369(12) Uani 1 1 d . . . . .
 H54 H 0.170289 0.527303 0.607010 0.044 Uiso 1 1 calc R . . . .
 C55 C 0.1919(2) 0.6003(3) 0.5321(3) 0.0346(11) Uani 1 1 d . . . . .
 H55 H 0.224629 0.577135 0.531355 0.041 Uiso 1 1 calc R . . . .
 C56 C 0.1647(2) 0.6702(3) 0.4916(3) 0.0337(11) Uani 1 1 d . . . . .
 H56 H 0.176458 0.702494 0.459402 0.040 Uiso 1 1 calc R . . . .
 C57 C 0.1166(2) 0.6833(3) 0.5080(3) 0.0329(11) Uani 1 1 d . . . . .
 H57 H 0.090989 0.726144 0.489284 0.039 Uiso 1 1 calc R . . . .
 C58 C 0.1142(2) 0.6202(3) 0.5577(3) 0.0356(11) Uani 1 1 d . . . . .
 H58 H 0.086117 0.612009 0.576674 0.043 Uiso 1 1 calc R . . . .
 Th2 Th 0.42829(2) 0.27853(2) 0.40050(2) 0.02111(4) Uani 1 1 d . . . . .
 Re2 Re 0.40244(2) 0.44201(2) 0.30765(2) 0.02444(5) Uani 1 1 d . . . . .
 Si4 Si 0.31565(5) 0.32230(8) 0.46592(6) 0.0250(2) Uani 1 1 d . . . . .
 Si5 Si 0.39496(5) 0.06692(8) 0.29982(6) 0.0250(2) Uani 1 1 d . . . . .
 Si6 Si 0.57088(5) 0.28039(9) 0.39968(7) 0.0305(3) Uani 1 1 d . . . . .
 N5 N 0.47126(15) 0.1925(3) 0.5216(2) 0.0249(8) Uani 1 1 d . . . . .
 N6 N 0.38162(15) 0.2972(3) 0.4806(2) 0.0254(8) Uani 1 1 d . . . . .
 N7 N 0.41097(15) 0.1351(2) 0.37195(19) 0.0253(8) Uani 1 1 d . . . . .
 N8 N 0.51973(15) 0.2793(3) 0.4356(2) 0.0259(8) Uani 1 1 d . . . . .
 C25 C 0.43928(18) 0.2048(3) 0.5691(2) 0.0274(10) Uani 1 1 d . . . . .
 H25A H 0.462189 0.200768 0.618625 0.033 Uiso 1 1 calc R . . . .
 H25B H 0.411914 0.160192 0.560731 0.033 Uiso 1 1 calc R . . . .
 C26 C 0.41341(19) 0.2905(3) 0.5559(2) 0.0285(10) Uani 1 1 d . . . . .
 H26A H 0.390281 0.298094 0.585636 0.034 Uiso 1 1 calc R . . . .
 H26B H 0.440749 0.335340 0.568046 0.034 Uiso 1 1 calc R . . . .
 C27 C 0.46929(19) 0.1043(3) 0.4958(2) 0.0280(9) Uani 1 1 d . . . . .
 H27A H 0.473137 0.064806 0.535423 0.034 Uiso 1 1 calc R . . . .
 H27B H 0.499238 0.094650 0.477426 0.034 Uiso 1 1 calc R . . . .
 C28 C 0.4175(2) 0.0861(3) 0.4381(2) 0.0291(10) Uani 1 1 d . . . . .
 H28A H 0.415734 0.024921 0.427032 0.035 Uiso 1 1 calc R . . . .
 H28B H 0.387712 0.099670 0.455829 0.035 Uiso 1 1 calc R . . . .
 C29 C 0.52560(18) 0.2256(3) 0.5533(3) 0.0302(10) Uani 1 1 d . . . . .
 H29A H 0.551701 0.181011 0.553350 0.036 Uiso 1 1 calc R . . . .
 H29B H 0.530938 0.242930 0.602491 0.036 Uiso 1 1 calc R . . . .
 C30 C 0.5335(2) 0.3015(3) 0.5106(3) 0.0311(10) Uani 1 1 d . . . . .
 H30A H 0.511042 0.349027 0.516435 0.037 Uiso 1 1 calc R . . . .
 H30B H 0.570885 0.320109 0.528188 0.037 Uiso 1 1 calc R . . . .
 C31 C 0.2836(2) 0.3366(4) 0.3694(3) 0.0384(12) Uani 1 1 d . . . . .
 H31A H 0.304071 0.377191 0.351500 0.058 Uiso 1 1 calc GR . . . .
 H31B H 0.247563 0.357872 0.360481 0.058 Uiso 1 1 calc GR . . . .
 H31C H 0.282454 0.282088 0.345588 0.058 Uiso 1 1 calc GR . . . .
 C32 C 0.3089(2) 0.4252(4) 0.5092(3) 0.0383(12) Uani 1 1 d . . . . .
 H32A H 0.328134 0.421795 0.559556 0.057 Uiso 1 1 calc GR . . . .
 H32B H 0.271472 0.436530 0.502292 0.057 Uiso 1 1 calc GR . . . .
 H32C H 0.323710 0.471085 0.488187 0.057 Uiso 1 1 calc GR . . . .
 C33 C 0.27559(19) 0.2389(4) 0.4972(3) 0.0318(10) Uani 1 1 d . . . . .
 C34 C 0.2929(3) 0.2297(5) 0.5774(3) 0.0541(18) Uani 1 1 d . . . . .
 H34A H 0.328950 0.207160 0.594175 0.081 Uiso 1 1 calc GR . . . .
 H34B H 0.268827 0.190911 0.590469 0.081 Uiso 1 1 calc GR . . . .
 H34C H 0.291888 0.285210 0.598766 0.081 Uiso 1 1 calc GR . . . .
 C35 C 0.2800(3) 0.1519(4) 0.4644(5) 0.061(2) Uani 1 1 d . . . . .
 H35A H 0.264447 0.155268 0.413254 0.092 Uiso 1 1 calc GR . . . .
 H35B H 0.261052 0.109374 0.482879 0.092 Uiso 1 1 calc GR . . . .
 H35C H 0.317335 0.135858 0.476422 0.092 Uiso 1 1 calc GR . . . .
 C36 C 0.2175(2) 0.2652(4) 0.4736(3) 0.0432(14) Uani 1 1 d . . . . .
 H36A H 0.213808 0.319082 0.495785 0.065 Uiso 1 1 calc GR . . . .
 H36B H 0.196547 0.221657 0.487413 0.065 Uiso 1 1 calc GR . . . .
 H36C H 0.204964 0.271800 0.422375 0.065 Uiso 1 1 calc GR . . . .
 C37 C 0.4047(2) 0.1193(3) 0.2210(3) 0.0350(11) Uani 1 1 d . . . . .
 H37A H 0.378162 0.163923 0.204112 0.052 Uiso 1 1 calc GR . . . .
 H37B H 0.400770 0.077218 0.183734 0.052 Uiso 1 1 calc GR . . . .
 H37C H 0.440152 0.144085 0.233748 0.052 Uiso 1 1 calc GR . . . .
 C38 C 0.4409(3) -0.0275(4) 0.3168(3) 0.0466(14) Uani 1 1 d . . . . .
 H38A H 0.477448 -0.008319 0.337916 0.070 Uiso 1 1 calc GR . . . .
 H38B H 0.437400 -0.056417 0.272372 0.070 Uiso 1 1 calc GR . . . .
 H38C H 0.431574 -0.066574 0.349037 0.070 Uiso 1 1 calc GR . . . .
 C39 C 0.3243(2) 0.0285(4) 0.2734(3) 0.0374(12) Uani 1 1 d . . . . .
 C40 C 0.3134(3) -0.0311(5) 0.2094(3) 0.0542(17) Uani 1 1 d . . . . .
 H40A H 0.319959 -0.000795 0.170257 0.081 Uiso 1 1 calc GR . . . .
 H40B H 0.276547 -0.050015 0.195375 0.081 Uiso 1 1 calc GR . . . .
 H40C H 0.336931 -0.080287 0.221937 0.081 Uiso 1 1 calc GR . . . .
 C41 C 0.3135(3) -0.0202(4) 0.3344(3) 0.0506(16) Uani 1 1 d . . . . .
 H41A H 0.337447 -0.068839 0.347352 0.076 Uiso 1 1 calc GR . . . .
 H41B H 0.276796 -0.040096 0.319470 0.076 Uiso 1 1 calc GR . . . .
 H41C H 0.319448 0.017381 0.375035 0.076 Uiso 1 1 calc GR . . . .
 C42 C 0.2859(2) 0.1036(5) 0.2548(4) 0.0568(17) Uani 1 1 d . . . . .
 H42A H 0.293500 0.142306 0.294902 0.085 Uiso 1 1 calc GR . . . .
 H42B H 0.249523 0.082881 0.243352 0.085 Uiso 1 1 calc GR . . . .
 H42C H 0.290258 0.133547 0.214113 0.085 Uiso 1 1 calc GR . . . .
 C43 C 0.6042(3) 0.3857(5) 0.4136(5) 0.067(2) Uani 1 1 d . . . . .
 H43A H 0.579785 0.428737 0.386359 0.100 Uiso 1 1 calc GR . . . .
 H43B H 0.635642 0.383439 0.398111 0.100 Uiso 1 1 calc GR . . . .
 H43C H 0.614797 0.400356 0.463606 0.100 Uiso 1 1 calc GR . . . .
 C44 C 0.5428(2) 0.2637(5) 0.3028(3) 0.0538(17) Uani 1 1 d . . . . .
 H44A H 0.524397 0.209149 0.293584 0.081 Uiso 1 1 calc GR . . . .
 H44B H 0.571396 0.264062 0.281817 0.081 Uiso 1 1 calc GR . . . .
 H44C H 0.517702 0.309257 0.282138 0.081 Uiso 1 1 calc GR . . . .
 C45 C 0.6239(2) 0.1956(5) 0.4353(3) 0.0470(15) Uani 1 1 d . . . . .
 C46 C 0.6544(3) 0.2109(7) 0.5130(4) 0.080(3) Uani 1 1 d . . . . .
 H46A H 0.671872 0.266168 0.518389 0.120 Uiso 1 1 calc GR . . . .
 H46B H 0.681038 0.166436 0.529905 0.120 Uiso 1 1 calc GR . . . .
 H46C H 0.629762 0.209758 0.540495 0.120 Uiso 1 1 calc GR . . . .
 C47 C 0.6643(3) 0.1984(6) 0.3946(4) 0.065(2) Uani 1 1 d . . . . .
 H47A H 0.646252 0.186670 0.344802 0.097 Uiso 1 1 calc GR . . . .
 H47B H 0.691732 0.155688 0.413644 0.097 Uiso 1 1 calc GR . . . .
 H47C H 0.680566 0.254645 0.399485 0.097 Uiso 1 1 calc GR . . . .
 C48 C 0.5987(3) 0.1069(5) 0.4260(5) 0.069(2) Uani 1 1 d . . . . .
 H48A H 0.573321 0.103491 0.452224 0.104 Uiso 1 1 calc GR . . . .
 H48B H 0.626414 0.064270 0.443852 0.104 Uiso 1 1 calc GR . . . .
 H48C H 0.580453 0.096594 0.376055 0.104 Uiso 1 1 calc GR . . . .
 C59 C 0.4691(2) 0.4798(3) 0.4040(2) 0.0342(11) Uani 1 1 d . . . . .
 H59 H 0.499363 0.445817 0.425135 0.041 Uiso 1 1 calc R . . . .
 C60 C 0.4636(2) 0.5411(3) 0.3502(3) 0.0349(11) Uani 1 1 d . . . . .
 H60 H 0.489653 0.555383 0.328750 0.042 Uiso 1 1 calc R . . . .
 C61 C 0.4121(2) 0.5774(3) 0.3340(3) 0.0333(11) Uani 1 1 d . . . . .
 H61 H 0.397973 0.620002 0.299805 0.040 Uiso 1 1 calc R . . . .
 C62 C 0.3853(2) 0.5387(3) 0.3781(3) 0.0325(11) Uani 1 1 d . . . . .
 H62 H 0.350506 0.550968 0.378717 0.039 Uiso 1 1 calc R . . . .
 C63 C 0.4204(2) 0.4789(3) 0.4204(2) 0.0325(11) Uani 1 1 d . . . . .
 H63 H 0.413017 0.443497 0.454401 0.039 Uiso 1 1 calc R . . . .
 C64 C 0.32898(19) 0.4010(3) 0.2275(2) 0.0308(10) Uani 1 1 d . . . . .
 H64 H 0.294964 0.415388 0.229926 0.037 Uiso 1 1 calc R . . . .
 C65 C 0.3591(2) 0.4488(3) 0.1942(2) 0.0364(12) Uani 1 1 d . . . . .
 H65 H 0.348148 0.500236 0.169299 0.044 Uiso 1 1 calc R . . . .
 C66 C 0.4080(2) 0.4079(4) 0.2040(3) 0.0388(12) Uani 1 1 d . . . . .
 H66 H 0.435885 0.427599 0.187862 0.047 Uiso 1 1 calc R . . . .
 C67 C 0.4081(2) 0.3314(3) 0.2425(3) 0.0319(10) Uani 1 1 d . . . . .
 H67 H 0.435813 0.290850 0.256007 0.038 Uiso 1 1 calc R . . . .
 C68 C 0.3587(2) 0.3271(3) 0.2569(2) 0.0282(10) Uani 1 1 d . . . . .
 H68 H 0.347664 0.283181 0.281530 0.034 Uiso 1 1 calc R . . . .

loop_
  _atom_site_aniso_label
  _atom_site_aniso_U_11
  _atom_site_aniso_U_22
  _atom_site_aniso_U_33
  _atom_site_aniso_U_23
  _atom_site_aniso_U_13
  _atom_site_aniso_U_12
 Th1 0.02401(8) 0.02199(8) 0.02024(8) 0.00056(5) 0.00745(6) -0.00078(5)
 Re1 0.03157(11) 0.02208(10) 0.02398(10) 0.00245(7) 0.00697(8) -0.00106(8)
 Si1 0.0255(6) 0.0322(7) 0.0299(6) -0.0014(5) 0.0111(5) -0.0034(5)
 Si2 0.0306(6) 0.0225(6) 0.0273(6) -0.0003(5) 0.0097(5) -0.0025(5)
 Si3 0.0295(6) 0.0302(7) 0.0290(6) 0.0023(5) 0.0129(5) 0.0035(5)
 N1 0.030(2) 0.032(2) 0.0264(19) 0.0032(17) 0.0098(16) 0.0007(17)
 N2 0.0229(18) 0.028(2) 0.029(2) -0.0006(16) 0.0096(15) -0.0015(15)
 N3 0.0281(19) 0.022(2) 0.033(2) 0.0025(16) 0.0062(16) 0.0012(16)
 N4 0.0271(19) 0.030(2) 0.0263(19) -0.0010(16) 0.0113(15) 0.0008(16)
 C1 0.029(2) 0.043(3) 0.024(2) 0.000(2) 0.0053(18) -0.001(2)
 C2 0.030(2) 0.037(3) 0.032(2) -0.010(2) 0.008(2) -0.009(2)
 C3 0.035(3) 0.035(3) 0.031(2) 0.008(2) 0.005(2) 0.001(2)
 C4 0.029(2) 0.028(2) 0.041(3) 0.003(2) 0.003(2) 0.004(2)
 C5 0.037(3) 0.054(3) 0.025(2) 0.003(2) 0.011(2) 0.006(2)
 C6 0.038(3) 0.040(3) 0.030(2) -0.006(2) 0.013(2) 0.000(2)
 C7 0.040(3) 0.053(4) 0.032(3) 0.000(2) 0.015(2) -0.008(3)
 C8 0.047(3) 0.046(3) 0.050(3) -0.009(3) 0.026(3) -0.016(3)
 C9 0.033(3) 0.051(4) 0.043(3) 0.001(3) 0.013(2) 0.008(2)
 C10 0.051(4) 0.045(4) 0.085(5) 0.010(3) 0.034(4) 0.014(3)
 C11 0.044(4) 0.108(7) 0.048(4) 0.003(4) 0.007(3) 0.025(4)
 C12 0.036(3) 0.062(4) 0.069(4) -0.010(3) 0.028(3) -0.001(3)
 C13 0.036(3) 0.029(3) 0.044(3) 0.000(2) 0.002(2) 0.000(2)
 C14 0.041(3) 0.038(3) 0.041(3) 0.004(2) 0.019(2) -0.003(2)
 C15 0.043(3) 0.034(3) 0.036(3) 0.007(2) 0.018(2) 0.005(2)
 C16 0.087(6) 0.070(5) 0.079(5) -0.040(4) 0.044(5) -0.026(4)
 C17 0.116(7) 0.084(6) 0.052(4) 0.024(4) 0.044(5) 0.067(6)
 C18 0.076(4) 0.042(3) 0.050(3) 0.004(3) 0.040(3) 0.004(3)
 C19 0.053(4) 0.033(3) 0.063(4) -0.006(3) 0.025(3) 0.005(3)
 C20 0.034(3) 0.070(4) 0.036(3) 0.011(3) 0.013(2) 0.009(3)
 C21 0.032(3) 0.042(3) 0.034(3) 0.004(2) 0.018(2) 0.000(2)
 C22 0.030(3) 0.066(4) 0.046(3) 0.003(3) 0.018(2) -0.004(3)
 C23 0.041(3) 0.053(4) 0.034(3) 0.011(3) 0.014(2) 0.001(3)
 C24 0.055(4) 0.037(3) 0.064(4) -0.004(3) 0.030(3) -0.014(3)
 C49 0.049(3) 0.022(2) 0.045(3) -0.006(2) 0.017(3) 0.001(2)
 C50 0.052(3) 0.019(2) 0.028(2) -0.0023(18) 0.011(2) -0.003(2)
 C51 0.040(3) 0.026(3) 0.035(3) -0.005(2) -0.001(2) -0.005(2)
 C52 0.056(3) 0.015(2) 0.039(3) 0.006(2) 0.011(2) -0.002(2)
 C53 0.039(3) 0.027(3) 0.042(3) -0.003(2) 0.010(2) -0.015(2)
 C54 0.044(3) 0.041(3) 0.018(2) 0.006(2) -0.001(2) -0.006(2)
 C55 0.028(2) 0.034(3) 0.036(3) -0.001(2) 0.002(2) -0.004(2)
 C56 0.038(3) 0.030(3) 0.028(2) 0.003(2) 0.003(2) -0.008(2)
 C57 0.041(3) 0.029(3) 0.027(2) -0.006(2) 0.008(2) -0.002(2)
 C58 0.047(3) 0.035(3) 0.028(2) -0.008(2) 0.015(2) -0.015(2)
 Th2 0.02462(8) 0.02179(8) 0.01800(7) -0.00117(5) 0.00824(6) -0.00244(5)
 Re2 0.03231(11) 0.02155(10) 0.02124(10) -0.00146(7) 0.01098(8) -0.00223(8)
 Si4 0.0252(6) 0.0280(6) 0.0234(6) 0.0004(5) 0.0100(5) -0.0005(5)
 Si5 0.0324(6) 0.0216(6) 0.0212(5) -0.0023(5) 0.0088(5) 0.0011(5)
 Si6 0.0275(6) 0.0378(7) 0.0299(6) -0.0045(5) 0.0145(5) -0.0073(5)
 N5 0.0241(18) 0.027(2) 0.0230(18) -0.0008(15) 0.0065(15) -0.0014(15)
 N6 0.0281(19) 0.027(2) 0.0210(18) -0.0018(15) 0.0084(15) -0.0014(15)
 N7 0.0303(19) 0.0230(19) 0.0224(18) -0.0001(15) 0.0081(15) -0.0038(15)
 N8 0.0207(17) 0.031(2) 0.0280(19) -0.0009(16) 0.0106(15) -0.0031(15)
 C25 0.026(2) 0.036(3) 0.022(2) 0.0039(19) 0.0097(18) -0.0012(19)
 C26 0.030(2) 0.034(3) 0.022(2) -0.0047(18) 0.0085(18) -0.002(2)
 C27 0.034(2) 0.027(2) 0.023(2) 0.0007(18) 0.0074(18) -0.0021(19)
 C28 0.038(3) 0.026(2) 0.024(2) -0.0017(18) 0.0115(19) -0.004(2)
 C29 0.021(2) 0.042(3) 0.026(2) -0.002(2) 0.0067(18) -0.007(2)
 C30 0.029(2) 0.036(3) 0.030(2) -0.007(2) 0.0117(19) -0.007(2)
 C31 0.030(2) 0.057(4) 0.027(2) 0.008(2) 0.007(2) 0.002(2)
 C32 0.036(3) 0.035(3) 0.046(3) -0.004(2) 0.016(2) 0.003(2)
 C33 0.027(2) 0.040(3) 0.031(2) 0.005(2) 0.0120(19) 0.003(2)
 C34 0.044(3) 0.082(5) 0.036(3) 0.027(3) 0.012(3) -0.004(3)
 C35 0.056(4) 0.035(3) 0.106(6) -0.011(4) 0.045(4) -0.015(3)
 C36 0.025(2) 0.054(4) 0.054(3) 0.013(3) 0.017(2) 0.003(2)
 C37 0.049(3) 0.032(3) 0.028(2) -0.004(2) 0.019(2) -0.004(2)
 C38 0.060(4) 0.040(3) 0.036(3) -0.004(2) 0.010(3) 0.014(3)
 C39 0.041(3) 0.039(3) 0.031(2) -0.007(2) 0.010(2) -0.014(2)
 C40 0.067(4) 0.059(4) 0.037(3) -0.016(3) 0.018(3) -0.034(3)
 C41 0.058(4) 0.057(4) 0.041(3) -0.012(3) 0.022(3) -0.032(3)
 C42 0.033(3) 0.057(4) 0.077(5) 0.004(4) 0.013(3) -0.003(3)
 C43 0.077(5) 0.055(4) 0.091(6) -0.017(4) 0.060(5) -0.033(4)
 C44 0.040(3) 0.092(5) 0.035(3) 0.005(3) 0.018(2) 0.004(3)
 C45 0.029(3) 0.072(4) 0.045(3) 0.006(3) 0.019(2) 0.005(3)
 C46 0.041(4) 0.154(10) 0.043(4) 0.019(5) 0.011(3) 0.016(5)
 C47 0.041(3) 0.101(6) 0.063(4) 0.012(4) 0.033(3) 0.014(4)
 C48 0.072(5) 0.051(4) 0.108(6) 0.016(4) 0.060(5) 0.021(4)
 C59 0.041(3) 0.033(3) 0.023(2) -0.010(2) 0.002(2) -0.002(2)
 C60 0.043(3) 0.026(3) 0.038(3) -0.009(2) 0.015(2) -0.016(2)
 C61 0.048(3) 0.019(2) 0.032(2) -0.0017(19) 0.012(2) -0.005(2)
 C62 0.040(3) 0.031(3) 0.029(2) -0.013(2) 0.014(2) -0.002(2)
 C63 0.045(3) 0.030(3) 0.022(2) -0.0117(19) 0.010(2) -0.011(2)
 C64 0.026(2) 0.036(3) 0.026(2) -0.005(2) 0.0031(18) -0.001(2)
 C65 0.057(3) 0.034(3) 0.0113(19) 0.0047(18) 0.001(2) -0.001(2)
 C66 0.053(3) 0.045(3) 0.026(2) -0.013(2) 0.024(2) -0.010(3)
 C67 0.042(3) 0.025(2) 0.030(2) -0.0130(19) 0.013(2) -0.001(2)
 C68 0.039(3) 0.022(2) 0.021(2) -0.0013(17) 0.0042(18) -0.0033(19)

_geom_special_details
;
 All esds (except the esd in the dihedral angle between two l.s. planes)
 are estimated using the full covariance matrix.  The cell esds are taken
 into account individually in the estimation of esds in distances, angles
 and torsion angles; correlations between esds in cell parameters are only
 used when they are defined by crystal symmetry.  An approximate (isotropic)
 treatment of cell esds is used for estimating esds involving l.s. planes.
;
loop_
  _geom_bond_atom_site_label_1
  _geom_bond_atom_site_label_2
  _geom_bond_distance
  _geom_bond_site_symmetry_2
  _geom_bond_publ_flag
 Th1 Re1 3.1117(2) . ?
 Th1 N1 2.718(4) . ?
 Th1 N2 2.318(4) . ?
 Th1 N3 2.343(4) . ?
 Th1 N4 2.331(4) . ?
 Re1 C49 2.225(5) . ?
 Re1 C50 2.246(5) . ?
 Re1 C51 2.250(5) . ?
 Re1 C52 2.207(5) . ?
 Re1 C53 2.222(5) . ?
 Re1 C54 2.213(5) . ?
 Re1 C55 2.209(5) . ?
 Re1 C56 2.216(5) . ?
 Re1 C57 2.224(5) . ?
 Re1 C58 2.192(5) . ?
 Si1 N2 1.737(4) . ?
 Si1 C7 1.872(6) . ?
 Si1 C8 1.876(6) . ?
 Si1 C9 1.908(6) . ?
 Si2 N3 1.730(4) . ?
 Si2 C13 1.884(5) . ?
 Si2 C14 1.882(5) . ?
 Si2 C15 1.915(6) . ?
 Si3 N4 1.727(4) . ?
 Si3 C19 1.888(6) . ?
 Si3 C20 1.874(6) . ?
 Si3 C21 1.902(5) . ?
 N1 C1 1.479(6) . ?
 N1 C3 1.472(7) . ?
 N1 C5 1.501(7) . ?
 N2 C2 1.471(6) . ?
 N3 C4 1.498(6) . ?
 N4 C6 1.483(6) . ?
 C1 H1A 0.9900 . ?
 C1 H1B 0.9900 . ?
 C1 C2 1.520(7) . ?
 C2 H2A 0.9900 . ?
 C2 H2B 0.9900 . ?
 C3 H3A 0.9900 . ?
 C3 H3B 0.9900 . ?
 C3 C4 1.530(7) . ?
 C4 H4A 0.9900 . ?
 C4 H4B 0.9900 . ?
 C5 H5A 0.9900 . ?
 C5 H5B 0.9900 . ?
 C5 C6 1.502(8) . ?
 C6 H6A 0.9900 . ?
 C6 H6B 0.9900 . ?
 C7 H7A 0.9800 . ?
 C7 H7B 0.9800 . ?
 C7 H7C 0.9800 . ?
 C8 H8A 0.9800 . ?
 C8 H8B 0.9800 . ?
 C8 H8C 0.9800 . ?
 C9 C10 1.544(9) . ?
 C9 C11 1.542(9) . ?
 C9 C12 1.535(8) . ?
 C10 H10A 0.9800 . ?
 C10 H10B 0.9800 . ?
 C10 H10C 0.9800 . ?
 C11 H11A 0.9800 . ?
 C11 H11B 0.9800 . ?
 C11 H11C 0.9800 . ?
 C12 H12A 0.9800 . ?
 C12 H12B 0.9800 . ?
 C12 H12C 0.9800 . ?
 C13 H13A 0.9800 . ?
 C13 H13B 0.9800 . ?
 C13 H13C 0.9800 . ?
 C14 H14A 0.9800 . ?
 C14 H14B 0.9800 . ?
 C14 H14C 0.9800 . ?
 C15 C16 1.541(9) . ?
 C15 C17 1.505(9) . ?
 C15 C18 1.523(8) . ?
 C16 H16A 0.9800 . ?
 C16 H16B 0.9800 . ?
 C16 H16C 0.9800 . ?
 C17 H17A 0.9800 . ?
 C17 H17B 0.9800 . ?
 C17 H17C 0.9800 . ?
 C18 H18A 0.9800 . ?
 C18 H18B 0.9800 . ?
 C18 H18C 0.9800 . ?
 C19 H19A 0.9800 . ?
 C19 H19B 0.9800 . ?
 C19 H19C 0.9800 . ?
 C20 H20A 0.9800 . ?
 C20 H20B 0.9800 . ?
 C20 H20C 0.9800 . ?
 C21 C22 1.539(7) . ?
 C21 C23 1.528(7) . ?
 C21 C24 1.518(8) . ?
 C22 H22A 0.9800 . ?
 C22 H22B 0.9800 . ?
 C22 H22C 0.9800 . ?
 C23 H23A 0.9800 . ?
 C23 H23B 0.9800 . ?
 C23 H23C 0.9800 . ?
 C24 H24A 0.9800 . ?
 C24 H24B 0.9800 . ?
 C24 H24C 0.9800 . ?
 C49 H49 0.9500 . ?
 C49 C50 1.425(8) . ?
 C49 C52 1.414(8) . ?
 C50 H50 0.9500 . ?
 C50 C51 1.430(8) . ?
 C51 H51 0.9500 . ?
 C51 C53 1.436(8) . ?
 C52 H52 0.9500 . ?
 C52 C53 1.408(8) . ?
 C53 H53 0.9500 . ?
 C54 H54 0.9500 . ?
 C54 C55 1.415(8) . ?
 C54 C58 1.408(8) . ?
 C55 H55 0.9500 . ?
 C55 C56 1.426(7) . ?
 C56 H56 0.9500 . ?
 C56 C57 1.436(8) . ?
 C57 H57 0.9500 . ?
 C57 C58 1.424(7) . ?
 C58 H58 0.9500 . ?
 Th2 Re2 3.1315(2) . ?
 Th2 N5 2.702(4) . ?
 Th2 N6 2.337(4) . ?
 Th2 N7 2.348(4) . ?
 Th2 N8 2.313(4) . ?
 Re2 C59 2.255(5) . ?
 Re2 C60 2.227(5) . ?
 Re2 C61 2.199(5) . ?
 Re2 C62 2.223(5) . ?
 Re2 C63 2.234(4) . ?
 Re2 C64 2.203(5) . ?
 Re2 C65 2.206(4) . ?
 Re2 C66 2.197(5) . ?
 Re2 C67 2.216(5) . ?
 Re2 C68 2.224(5) . ?
 Si4 N6 1.734(4) . ?
 Si4 C31 1.866(5) . ?
 Si4 C32 1.878(6) . ?
 Si4 C33 1.920(5) . ?
 Si5 N7 1.745(4) . ?
 Si5 C37 1.873(5) . ?
 Si5 C38 1.890(6) . ?
 Si5 C39 1.889(5) . ?
 Si6 N8 1.729(4) . ?
 Si6 C43 1.866(7) . ?
 Si6 C44 1.868(6) . ?
 Si6 C45 1.914(7) . ?
 N5 C25 1.477(6) . ?
 N5 C27 1.481(6) . ?
 N5 C29 1.481(6) . ?
 N6 C26 1.485(6) . ?
 N7 C28 1.497(6) . ?
 N8 C30 1.473(6) . ?
 C25 H25A 0.9900 . ?
 C25 H25B 0.9900 . ?
 C25 C26 1.504(7) . ?
 C26 H26A 0.9900 . ?
 C26 H26B 0.9900 . ?
 C27 H27A 0.9900 . ?
 C27 H27B 0.9900 . ?
 C27 C28 1.524(6) . ?
 C28 H28A 0.9900 . ?
 C28 H28B 0.9900 . ?
 C29 H29A 0.9900 . ?
 C29 H29B 0.9900 . ?
 C29 C30 1.525(7) . ?
 C30 H30A 0.9900 . ?
 C30 H30B 0.9900 . ?
 C31 H31A 0.9800 . ?
 C31 H31B 0.9800 . ?
 C31 H31C 0.9800 . ?
 C32 H32A 0.9800 . ?
 C32 H32B 0.9800 . ?
 C32 H32C 0.9800 . ?
 C33 C34 1.534(7) . ?
 C33 C35 1.543(8) . ?
 C33 C36 1.526(7) . ?
 C34 H34A 0.9800 . ?
 C34 H34B 0.9800 . ?
 C34 H34C 0.9800 . ?
 C35 H35A 0.9800 . ?
 C35 H35B 0.9800 . ?
 C35 H35C 0.9800 . ?
 C36 H36A 0.9800 . ?
 C36 H36B 0.9800 . ?
 C36 H36C 0.9800 . ?
 C37 H37A 0.9800 . ?
 C37 H37B 0.9800 . ?
 C37 H37C 0.9800 . ?
 C38 H38A 0.9800 . ?
 C38 H38B 0.9800 . ?
 C38 H38C 0.9800 . ?
 C39 C40 1.544(8) . ?
 C39 C41 1.546(8) . ?
 C39 C42 1.533(9) . ?
 C40 H40A 0.9800 . ?
 C40 H40B 0.9800 . ?
 C40 H40C 0.9800 . ?
 C41 H41A 0.9800 . ?
 C41 H41B 0.9800 . ?
 C41 H41C 0.9800 . ?
 C42 H42A 0.9800 . ?
 C42 H42B 0.9800 . ?
 C42 H42C 0.9800 . ?
 C43 H43A 0.9800 . ?
 C43 H43B 0.9800 . ?
 C43 H43C 0.9800 . ?
 C44 H44A 0.9800 . ?
 C44 H44B 0.9800 . ?
 C44 H44C 0.9800 . ?
 C45 C46 1.533(10) . ?
 C45 C47 1.542(8) . ?
 C45 C48 1.539(10) . ?
 C46 H46A 0.9800 . ?
 C46 H46B 0.9800 . ?
 C46 H46C 0.9800 . ?
 C47 H47A 0.9800 . ?
 C47 H47B 0.9800 . ?
 C47 H47C 0.9800 . ?
 C48 H48A 0.9800 . ?
 C48 H48B 0.9800 . ?
 C48 H48C 0.9800 . ?
 C59 H59 0.9500 . ?
 C59 C60 1.423(8) . ?
 C59 C63 1.434(8) . ?
 C60 H60 0.9500 . ?
 C60 C61 1.427(8) . ?
 C61 H61 0.9500 . ?
 C61 C62 1.438(7) . ?
 C62 H62 0.9500 . ?
 C62 C63 1.410(8) . ?
 C63 H63 0.9500 . ?
 C64 H64 0.9500 . ?
 C64 C65 1.412(8) . ?
 C64 C68 1.429(7) . ?
 C65 H65 0.9500 . ?
 C65 C66 1.412(8) . ?
 C66 H66 0.9500 . ?
 C66 C67 1.435(8) . ?
 C67 H67 0.9500 . ?
 C67 C68 1.435(7) . ?
 C68 H68 0.9500 . ?

loop_
  _geom_angle_atom_site_label_1
  _geom_angle_atom_site_label_2
  _geom_angle_atom_site_label_3
  _geom_angle
  _geom_angle_site_symmetry_1
  _geom_angle_site_symmetry_3
  _geom_angle_publ_flag
 N1 Th1 Re1 156.37(9) . . ?
 N2 Th1 Re1 103.12(10) . . ?
 N2 Th1 N1 68.20(13) . . ?
 N2 Th1 N3 99.73(14) . . ?
 N2 Th1 N4 120.14(14) . . ?
 N3 Th1 Re1 130.19(10) . . ?
 N3 Th1 N1 73.44(13) . . ?
 N4 Th1 Re1 100.74(10) . . ?
 N4 Th1 N1 68.22(13) . . ?
 N4 Th1 N3 104.93(14) . . ?
 C49 Re1 Th1 105.76(15) . . ?
 C49 Re1 C50 37.2(2) . . ?
 C49 Re1 C51 62.5(2) . . ?
 C50 Re1 Th1 71.45(13) . . ?
 C50 Re1 C51 37.1(2) . . ?
 C51 Re1 Th1 72.32(14) . . ?
 C52 Re1 Th1 130.82(14) . . ?
 C52 Re1 C49 37.2(2) . . ?
 C52 Re1 C50 61.51(19) . . ?
 C52 Re1 C51 61.9(2) . . ?
 C52 Re1 C53 37.1(2) . . ?
 C52 Re1 C54 102.4(2) . . ?
 C52 Re1 C55 117.1(2) . . ?
 C52 Re1 C56 153.6(2) . . ?
 C52 Re1 C57 155.8(2) . . ?
 C53 Re1 Th1 107.83(15) . . ?
 C53 Re1 C49 62.6(2) . . ?
 C53 Re1 C50 62.1(2) . . ?
 C53 Re1 C51 37.5(2) . . ?
 C53 Re1 C57 130.7(2) . . ?
 C54 Re1 Th1 126.74(15) . . ?
 C54 Re1 C49 118.7(2) . . ?
 C54 Re1 C50 155.2(2) . . ?
 C54 Re1 C51 154.1(2) . . ?
 C54 Re1 C53 117.6(2) . . ?
 C54 Re1 C56 62.14(19) . . ?
 C54 Re1 C57 62.2(2) . . ?
 C55 Re1 Th1 103.38(14) . . ?
 C55 Re1 C49 108.3(2) . . ?
 C55 Re1 C50 130.2(2) . . ?
 C55 Re1 C51 167.1(2) . . ?
 C55 Re1 C53 148.8(2) . . ?
 C55 Re1 C54 37.3(2) . . ?
 C55 Re1 C56 37.59(19) . . ?
 C55 Re1 C57 63.0(2) . . ?
 C56 Re1 Th1 67.69(13) . . ?
 C56 Re1 C49 128.6(2) . . ?
 C56 Re1 C50 123.68(19) . . ?
 C56 Re1 C51 140.01(19) . . ?
 C56 Re1 C53 168.3(2) . . ?
 C56 Re1 C57 37.7(2) . . ?
 C57 Re1 Th1 67.63(13) . . ?
 C57 Re1 C49 165.9(2) . . ?
 C57 Re1 C50 139.05(18) . . ?
 C57 Re1 C51 123.7(2) . . ?
 C58 Re1 Th1 103.33(15) . . ?
 C58 Re1 C49 150.9(2) . . ?
 C58 Re1 C50 166.1(2) . . ?
 C58 Re1 C51 129.4(2) . . ?
 C58 Re1 C52 118.9(2) . . ?
 C58 Re1 C53 109.1(2) . . ?
 C58 Re1 C54 37.3(2) . . ?
 C58 Re1 C55 63.1(2) . . ?
 C58 Re1 C56 62.99(19) . . ?
 C58 Re1 C57 37.61(19) . . ?
 N2 Si1 C7 106.9(2) . . ?
 N2 Si1 C8 111.3(2) . . ?
 N2 Si1 C9 115.7(2) . . ?
 C7 Si1 C8 108.0(3) . . ?
 C7 Si1 C9 107.5(3) . . ?
 C8 Si1 C9 107.3(3) . . ?
 N3 Si2 C13 111.4(2) . . ?
 N3 Si2 C14 110.9(2) . . ?
 N3 Si2 C15 113.3(2) . . ?
 C13 Si2 C15 107.3(3) . . ?
 C14 Si2 C13 105.6(3) . . ?
 C14 Si2 C15 107.8(3) . . ?
 N4 Si3 C19 112.2(3) . . ?
 N4 Si3 C20 109.4(2) . . ?
 N4 Si3 C21 113.1(2) . . ?
 C19 Si3 C21 108.1(3) . . ?
 C20 Si3 C19 106.0(3) . . ?
 C20 Si3 C21 107.8(3) . . ?
 C1 N1 Th1 108.0(3) . . ?
 C1 N1 C5 111.7(4) . . ?
 C3 N1 Th1 103.0(3) . . ?
 C3 N1 C1 112.6(4) . . ?
 C3 N1 C5 112.8(4) . . ?
 C5 N1 Th1 108.2(3) . . ?
 Si1 N2 Th1 133.0(2) . . ?
 C2 N2 Th1 111.2(3) . . ?
 C2 N2 Si1 115.3(3) . . ?
 Si2 N3 Th1 141.8(2) . . ?
 C4 N3 Th1 106.5(3) . . ?
 C4 N3 Si2 111.6(3) . . ?
 Si3 N4 Th1 134.1(2) . . ?
 C6 N4 Th1 109.6(3) . . ?
 C6 N4 Si3 116.0(3) . . ?
 N1 C1 H1A 109.7 . . ?
 N1 C1 H1B 109.7 . . ?
 N1 C1 C2 109.9(4) . . ?
 H1A C1 H1B 108.2 . . ?
 C2 C1 H1A 109.7 . . ?
 C2 C1 H1B 109.7 . . ?
 N2 C2 C1 109.3(4) . . ?
 N2 C2 H2A 109.8 . . ?
 N2 C2 H2B 109.8 . . ?
 C1 C2 H2A 109.8 . . ?
 C1 C2 H2B 109.8 . . ?
 H2A C2 H2B 108.3 . . ?
 N1 C3 H3A 109.6 . . ?
 N1 C3 H3B 109.6 . . ?
 N1 C3 C4 110.4(4) . . ?
 H3A C3 H3B 108.1 . . ?
 C4 C3 H3A 109.6 . . ?
 C4 C3 H3B 109.6 . . ?
 N3 C4 C3 112.7(4) . . ?
 N3 C4 H4A 109.0 . . ?
 N3 C4 H4B 109.0 . . ?
 C3 C4 H4A 109.0 . . ?
 C3 C4 H4B 109.0 . . ?
 H4A C4 H4B 107.8 . . ?
 N1 C5 H5A 109.6 . . ?
 N1 C5 H5B 109.6 . . ?
 N1 C5 C6 110.3(4) . . ?
 H5A C5 H5B 108.1 . . ?
 C6 C5 H5A 109.6 . . ?
 C6 C5 H5B 109.6 . . ?
 N4 C6 C5 110.9(4) . . ?
 N4 C6 H6A 109.5 . . ?
 N4 C6 H6B 109.5 . . ?
 C5 C6 H6A 109.5 . . ?
 C5 C6 H6B 109.5 . . ?
 H6A C6 H6B 108.1 . . ?
 Si1 C7 H7A 109.5 . . ?
 Si1 C7 H7B 109.5 . . ?
 Si1 C7 H7C 109.5 . . ?
 H7A C7 H7B 109.5 . . ?
 H7A C7 H7C 109.5 . . ?
 H7B C7 H7C 109.5 . . ?
 Si1 C8 H8A 109.5 . . ?
 Si1 C8 H8B 109.5 . . ?
 Si1 C8 H8C 109.5 . . ?
 H8A C8 H8B 109.5 . . ?
 H8A C8 H8C 109.5 . . ?
 H8B C8 H8C 109.5 . . ?
 C10 C9 Si1 110.2(4) . . ?
 C11 C9 Si1 113.3(5) . . ?
 C11 C9 C10 108.3(6) . . ?
 C12 C9 Si1 108.7(4) . . ?
 C12 C9 C10 108.3(5) . . ?
 C12 C9 C11 107.8(5) . . ?
 C9 C10 H10A 109.5 . . ?
 C9 C10 H10B 109.5 . . ?
 C9 C10 H10C 109.5 . . ?
 H10A C10 H10B 109.5 . . ?
 H10A C10 H10C 109.5 . . ?
 H10B C10 H10C 109.5 . . ?
 C9 C11 H11A 109.5 . . ?
 C9 C11 H11B 109.5 . . ?
 C9 C11 H11C 109.5 . . ?
 H11A C11 H11B 109.5 . . ?
 H11A C11 H11C 109.5 . . ?
 H11B C11 H11C 109.5 . . ?
 C9 C12 H12A 109.5 . . ?
 C9 C12 H12B 109.5 . . ?
 C9 C12 H12C 109.5 . . ?
 H12A C12 H12B 109.5 . . ?
 H12A C12 H12C 109.5 . . ?
 H12B C12 H12C 109.5 . . ?
 Si2 C13 H13A 109.5 . . ?
 Si2 C13 H13B 109.5 . . ?
 Si2 C13 H13C 109.5 . . ?
 H13A C13 H13B 109.5 . . ?
 H13A C13 H13C 109.5 . . ?
 H13B C13 H13C 109.5 . . ?
 Si2 C14 H14A 109.5 . . ?
 Si2 C14 H14B 109.5 . . ?
 Si2 C14 H14C 109.5 . . ?
 H14A C14 H14B 109.5 . . ?
 H14A C14 H14C 109.5 . . ?
 H14B C14 H14C 109.5 . . ?
 C16 C15 Si2 108.8(4) . . ?
 C17 C15 Si2 112.8(4) . . ?
 C17 C15 C16 109.8(7) . . ?
 C17 C15 C18 108.0(6) . . ?
 C18 C15 Si2 110.3(4) . . ?
 C18 C15 C16 106.9(6) . . ?
 C15 C16 H16A 109.5 . . ?
 C15 C16 H16B 109.5 . . ?
 C15 C16 H16C 109.5 . . ?
 H16A C16 H16B 109.5 . . ?
 H16A C16 H16C 109.5 . . ?
 H16B C16 H16C 109.5 . . ?
 C15 C17 H17A 109.5 . . ?
 C15 C17 H17B 109.5 . . ?
 C15 C17 H17C 109.5 . . ?
 H17A C17 H17B 109.5 . . ?
 H17A C17 H17C 109.5 . . ?
 H17B C17 H17C 109.5 . . ?
 C15 C18 H18A 109.5 . . ?
 C15 C18 H18B 109.5 . . ?
 C15 C18 H18C 109.5 . . ?
 H18A C18 H18B 109.5 . . ?
 H18A C18 H18C 109.5 . . ?
 H18B C18 H18C 109.5 . . ?
 Si3 C19 H19A 109.5 . . ?
 Si3 C19 H19B 109.5 . . ?
 Si3 C19 H19C 109.5 . . ?
 H19A C19 H19B 109.5 . . ?
 H19A C19 H19C 109.5 . . ?
 H19B C19 H19C 109.5 . . ?
 Si3 C20 H20A 109.5 . . ?
 Si3 C20 H20B 109.5 . . ?
 Si3 C20 H20C 109.5 . . ?
 H20A C20 H20B 109.5 . . ?
 H20A C20 H20C 109.5 . . ?
 H20B C20 H20C 109.5 . . ?
 C22 C21 Si3 109.8(4) . . ?
 C23 C21 Si3 111.9(4) . . ?
 C23 C21 C22 107.8(4) . . ?
 C24 C21 Si3 109.4(4) . . ?
 C24 C21 C22 109.2(5) . . ?
 C24 C21 C23 108.7(5) . . ?
 C21 C22 H22A 109.5 . . ?
 C21 C22 H22B 109.5 . . ?
 C21 C22 H22C 109.5 . . ?
 H22A C22 H22B 109.5 . . ?
 H22A C22 H22C 109.5 . . ?
 H22B C22 H22C 109.5 . . ?
 C21 C23 H23A 109.5 . . ?
 C21 C23 H23B 109.5 . . ?
 C21 C23 H23C 109.5 . . ?
 H23A C23 H23B 109.5 . . ?
 H23A C23 H23C 109.5 . . ?
 H23B C23 H23C 109.5 . . ?
 C21 C24 H24A 109.5 . . ?
 C21 C24 H24B 109.5 . . ?
 C21 C24 H24C 109.5 . . ?
 H24A C24 H24B 109.5 . . ?
 H24A C24 H24C 109.5 . . ?
 H24B C24 H24C 109.5 . . ?
 Re1 C49 H49 122.2 . . ?
 C50 C49 Re1 72.2(3) . . ?
 C50 C49 H49 126.7 . . ?
 C52 C49 Re1 70.7(3) . . ?
 C52 C49 H49 126.7 . . ?
 C52 C49 C50 106.7(5) . . ?
 Re1 C50 H50 123.8 . . ?
 C49 C50 Re1 70.6(3) . . ?
 C49 C50 H50 125.6 . . ?
 C49 C50 C51 108.8(5) . . ?
 C51 C50 Re1 71.6(3) . . ?
 C51 C50 H50 125.6 . . ?
 Re1 C51 H51 123.7 . . ?
 C50 C51 Re1 71.3(3) . . ?
 C50 C51 H51 126.5 . . ?
 C50 C51 C53 107.0(5) . . ?
 C53 C51 Re1 70.2(3) . . ?
 C53 C51 H51 126.5 . . ?
 Re1 C52 H52 122.4 . . ?
 C49 C52 Re1 72.1(3) . . ?
 C49 C52 H52 125.0 . . ?
 C53 C52 Re1 72.1(3) . . ?
 C53 C52 C49 110.0(5) . . ?
 C53 C52 H52 125.0 . . ?
 Re1 C53 H53 122.3 . . ?
 C51 C53 Re1 72.3(3) . . ?
 C51 C53 H53 126.3 . . ?
 C52 C53 Re1 70.9(3) . . ?
 C52 C53 C51 107.4(5) . . ?
 C52 C53 H53 126.3 . . ?
 Re1 C54 H54 124.5 . . ?
 C55 C54 Re1 71.2(3) . . ?
 C55 C54 H54 125.3 . . ?
 C58 C54 Re1 70.5(3) . . ?
 C58 C54 H54 125.3 . . ?
 C58 C54 C55 109.3(5) . . ?
 Re1 C55 H55 122.4 . . ?
 C54 C55 Re1 71.5(3) . . ?
 C54 C55 H55 126.4 . . ?
 C54 C55 C56 107.1(5) . . ?
 C56 C55 Re1 71.5(3) . . ?
 C56 C55 H55 126.4 . . ?
 Re1 C56 H56 123.3 . . ?
 C55 C56 Re1 70.9(3) . . ?
 C55 C56 H56 125.9 . . ?
 C55 C56 C57 108.2(5) . . ?
 C57 C56 Re1 71.4(3) . . ?
 C57 C56 H56 125.9 . . ?
 Re1 C57 H57 124.5 . . ?
 C56 C57 Re1 70.8(3) . . ?
 C56 C57 H57 126.4 . . ?
 C58 C57 Re1 70.0(3) . . ?
 C58 C57 C56 107.3(5) . . ?
 C58 C57 H57 126.4 . . ?
 Re1 C58 H58 121.1 . . ?
 C54 C58 Re1 72.2(3) . . ?
 C54 C58 C57 108.0(5) . . ?
 C54 C58 H58 126.0 . . ?
 C57 C58 Re1 72.4(3) . . ?
 C57 C58 H58 126.0 . . ?
 N5 Th2 Re2 154.25(8) . . ?
 N6 Th2 Re2 103.84(10) . . ?
 N6 Th2 N5 67.24(13) . . ?
 N6 Th2 N7 100.54(14) . . ?
 N7 Th2 Re2 131.44(9) . . ?
 N7 Th2 N5 74.26(12) . . ?
 N8 Th2 Re2 100.97(10) . . ?
 N8 Th2 N5 67.73(13) . . ?
 N8 Th2 N6 121.78(13) . . ?
 N8 Th2 N7 100.78(14) . . ?
 C59 Re2 Th2 75.07(14) . . ?
 C60 Re2 Th2 110.78(15) . . ?
 C60 Re2 C59 37.0(2) . . ?
 C60 Re2 C63 62.04(19) . . ?
 C61 Re2 Th2 132.26(14) . . ?
 C61 Re2 C59 62.3(2) . . ?
 C61 Re2 C60 37.6(2) . . ?
 C61 Re2 C62 37.93(19) . . ?
 C61 Re2 C63 62.08(19) . . ?
 C61 Re2 C64 118.1(2) . . ?
 C61 Re2 C65 100.6(2) . . ?
 C61 Re2 C67 152.2(2) . . ?
 C61 Re2 C68 155.38(19) . . ?
 C62 Re2 Th2 103.87(14) . . ?
 C62 Re2 C59 62.47(19) . . ?
 C62 Re2 C60 63.0(2) . . ?
 C62 Re2 C63 36.9(2) . . ?
 C62 Re2 C68 131.95(19) . . ?
 C63 Re2 Th2 71.16(14) . . ?
 C63 Re2 C59 37.25(19) . . ?
 C64 Re2 Th2 99.77(14) . . ?
 C64 Re2 C59 169.22(19) . . ?
 C64 Re2 C60 149.4(2) . . ?
 C64 Re2 C62 110.64(19) . . ?
 C64 Re2 C63 132.31(19) . . ?
 C64 Re2 C65 37.4(2) . . ?
 C64 Re2 C67 63.08(19) . . ?
 C64 Re2 C68 37.65(18) . . ?
 C65 Re2 Th2 126.81(14) . . ?
 C65 Re2 C59 152.4(2) . . ?
 C65 Re2 C60 116.3(2) . . ?
 C65 Re2 C62 118.4(2) . . ?
 C65 Re2 C63 154.9(2) . . ?
 C65 Re2 C67 62.7(2) . . ?
 C65 Re2 C68 62.53(18) . . ?
 C66 Re2 Th2 107.01(16) . . ?
 C66 Re2 C59 127.3(2) . . ?
 C66 Re2 C60 106.0(2) . . ?
 C66 Re2 C61 115.3(2) . . ?
 C66 Re2 C62 149.1(2) . . ?
 C66 Re2 C63 164.5(2) . . ?
 C66 Re2 C64 63.0(2) . . ?
 C66 Re2 C65 37.4(2) . . ?
 C66 Re2 C67 38.0(2) . . ?
 C66 Re2 C68 63.17(19) . . ?
 C67 Re2 Th2 69.90(14) . . ?
 C67 Re2 C59 122.2(2) . . ?
 C67 Re2 C60 127.1(2) . . ?
 C67 Re2 C62 169.18(19) . . ?
 C67 Re2 C63 140.3(2) . . ?
 C67 Re2 C68 37.73(19) . . ?
 C68 Re2 Th2 65.43(12) . . ?
 C68 Re2 C59 140.05(19) . . ?
 C68 Re2 C60 164.7(2) . . ?
 C68 Re2 C63 126.19(18) . . ?
 N6 Si4 C31 108.2(2) . . ?
 N6 Si4 C32 111.0(2) . . ?
 N6 Si4 C33 115.1(2) . . ?
 C31 Si4 C32 107.2(3) . . ?
 C31 Si4 C33 107.5(2) . . ?
 C32 Si4 C33 107.5(2) . . ?
 N7 Si5 C37 111.3(2) . . ?
 N7 Si5 C38 111.2(2) . . ?
 N7 Si5 C39 113.1(2) . . ?
 C37 Si5 C38 104.3(3) . . ?
 C37 Si5 C39 107.2(2) . . ?
 C39 Si5 C38 109.2(3) . . ?
 N8 Si6 C43 110.3(3) . . ?
 N8 Si6 C44 108.7(2) . . ?
 N8 Si6 C45 115.0(2) . . ?
 C43 Si6 C44 107.3(4) . . ?
 C43 Si6 C45 107.9(4) . . ?
 C44 Si6 C45 107.3(3) . . ?
 C25 N5 Th2 110.3(3) . . ?
 C25 N5 C27 112.6(4) . . ?
 C25 N5 C29 111.1(4) . . ?
 C27 N5 Th2 101.6(3) . . ?
 C27 N5 C29 113.9(4) . . ?
 C29 N5 Th2 106.8(3) . . ?
 Si4 N6 Th2 129.9(2) . . ?
 C26 N6 Th2 115.7(3) . . ?
 C26 N6 Si4 114.3(3) . . ?
 Si5 N7 Th2 140.9(2) . . ?
 C28 N7 Th2 108.9(3) . . ?
 C28 N7 Si5 110.2(3) . . ?
 Si6 N8 Th2 139.9(2) . . ?
 C30 N8 Th2 102.3(3) . . ?
 C30 N8 Si6 116.5(3) . . ?
 N5 C25 H25A 109.8 . . ?
 N5 C25 H25B 109.8 . . ?
 N5 C25 C26 109.2(4) . . ?
 H25A C25 H25B 108.3 . . ?
 C26 C25 H25A 109.8 . . ?
 C26 C25 H25B 109.8 . . ?
 N6 C26 C25 109.1(4) . . ?
 N6 C26 H26A 109.9 . . ?
 N6 C26 H26B 109.9 . . ?
 C25 C26 H26A 109.9 . . ?
 C25 C26 H26B 109.9 . . ?
 H26A C26 H26B 108.3 . . ?
 N5 C27 H27A 109.3 . . ?
 N5 C27 H27B 109.3 . . ?
 N5 C27 C28 111.5(4) . . ?
 H27A C27 H27B 108.0 . . ?
 C28 C27 H27A 109.3 . . ?
 C28 C27 H27B 109.3 . . ?
 N7 C28 C27 113.6(4) . . ?
 N7 C28 H28A 108.8 . . ?
 N7 C28 H28B 108.8 . . ?
 C27 C28 H28A 108.8 . . ?
 C27 C28 H28B 108.8 . . ?
 H28A C28 H28B 107.7 . . ?
 N5 C29 H29A 109.9 . . ?
 N5 C29 H29B 109.9 . . ?
 N5 C29 C30 109.0(4) . . ?
 H29A C29 H29B 108.3 . . ?
 C30 C29 H29A 109.9 . . ?
 C30 C29 H29B 109.9 . . ?
 N8 C30 C29 110.5(4) . . ?
 N8 C30 H30A 109.5 . . ?
 N8 C30 H30B 109.5 . . ?
 C29 C30 H30A 109.5 . . ?
 C29 C30 H30B 109.5 . . ?
 H30A C30 H30B 108.1 . . ?
 Si4 C31 H31A 109.5 . . ?
 Si4 C31 H31B 109.5 . . ?
 Si4 C31 H31C 109.5 . . ?
 H31A C31 H31B 109.5 . . ?
 H31A C31 H31C 109.5 . . ?
 H31B C31 H31C 109.5 . . ?
 Si4 C32 H32A 109.5 . . ?
 Si4 C32 H32B 109.5 . . ?
 Si4 C32 H32C 109.5 . . ?
 H32A C32 H32B 109.5 . . ?
 H32A C32 H32C 109.5 . . ?
 H32B C32 H32C 109.5 . . ?
 C34 C33 Si4 113.1(4) . . ?
 C34 C33 C35 108.9(6) . . ?
 C35 C33 Si4 110.4(4) . . ?
 C36 C33 Si4 108.9(4) . . ?
 C36 C33 C34 107.0(5) . . ?
 C36 C33 C35 108.4(5) . . ?
 C33 C34 H34A 109.5 . . ?
 C33 C34 H34B 109.5 . . ?
 C33 C34 H34C 109.5 . . ?
 H34A C34 H34B 109.5 . . ?
 H34A C34 H34C 109.5 . . ?
 H34B C34 H34C 109.5 . . ?
 C33 C35 H35A 109.5 . . ?
 C33 C35 H35B 109.5 . . ?
 C33 C35 H35C 109.5 . . ?
 H35A C35 H35B 109.5 . . ?
 H35A C35 H35C 109.5 . . ?
 H35B C35 H35C 109.5 . . ?
 C33 C36 H36A 109.5 . . ?
 C33 C36 H36B 109.5 . . ?
 C33 C36 H36C 109.5 . . ?
 H36A C36 H36B 109.5 . . ?
 H36A C36 H36C 109.5 . . ?
 H36B C36 H36C 109.5 . . ?
 Si5 C37 H37A 109.5 . . ?
 Si5 C37 H37B 109.5 . . ?
 Si5 C37 H37C 109.5 . . ?
 H37A C37 H37B 109.5 . . ?
 H37A C37 H37C 109.5 . . ?
 H37B C37 H37C 109.5 . . ?
 Si5 C38 H38A 109.5 . . ?
 Si5 C38 H38B 109.5 . . ?
 Si5 C38 H38C 109.5 . . ?
 H38A C38 H38B 109.5 . . ?
 H38A C38 H38C 109.5 . . ?
 H38B C38 H38C 109.5 . . ?
 C40 C39 Si5 109.8(4) . . ?
 C40 C39 C41 108.7(5) . . ?
 C41 C39 Si5 110.8(4) . . ?
 C42 C39 Si5 110.4(4) . . ?
 C42 C39 C40 109.5(5) . . ?
 C42 C39 C41 107.7(5) . . ?
 C39 C40 H40A 109.5 . . ?
 C39 C40 H40B 109.5 . . ?
 C39 C40 H40C 109.5 . . ?
 H40A C40 H40B 109.5 . . ?
 H40A C40 H40C 109.5 . . ?
 H40B C40 H40C 109.5 . . ?
 C39 C41 H41A 109.5 . . ?
 C39 C41 H41B 109.5 . . ?
 C39 C41 H41C 109.5 . . ?
 H41A C41 H41B 109.5 . . ?
 H41A C41 H41C 109.5 . . ?
 H41B C41 H41C 109.5 . . ?
 C39 C42 H42A 109.5 . . ?
 C39 C42 H42B 109.5 . . ?
 C39 C42 H42C 109.5 . . ?
 H42A C42 H42B 109.5 . . ?
 H42A C42 H42C 109.5 . . ?
 H42B C42 H42C 109.5 . . ?
 Si6 C43 H43A 109.5 . . ?
 Si6 C43 H43B 109.5 . . ?
 Si6 C43 H43C 109.5 . . ?
 H43A C43 H43B 109.5 . . ?
 H43A C43 H43C 109.5 . . ?
 H43B C43 H43C 109.5 . . ?
 Si6 C44 H44A 109.5 . . ?
 Si6 C44 H44B 109.5 . . ?
 Si6 C44 H44C 109.5 . . ?
 H44A C44 H44B 109.5 . . ?
 H44A C44 H44C 109.5 . . ?
 H44B C44 H44C 109.5 . . ?
 C46 C45 Si6 111.3(5) . . ?
 C46 C45 C47 107.3(5) . . ?
 C46 C45 C48 109.7(7) . . ?
 C47 C45 Si6 109.8(5) . . ?
 C48 C45 Si6 110.5(4) . . ?
 C48 C45 C47 108.1(6) . . ?
 C45 C46 H46A 109.5 . . ?
 C45 C46 H46B 109.5 . . ?
 C45 C46 H46C 109.5 . . ?
 H46A C46 H46B 109.5 . . ?
 H46A C46 H46C 109.5 . . ?
 H46B C46 H46C 109.5 . . ?
 C45 C47 H47A 109.5 . . ?
 C45 C47 H47B 109.5 . . ?
 C45 C47 H47C 109.5 . . ?
 H47A C47 H47B 109.5 . . ?
 H47A C47 H47C 109.5 . . ?
 H47B C47 H47C 109.5 . . ?
 C45 C48 H48A 109.5 . . ?
 C45 C48 H48B 109.5 . . ?
 C45 C48 H48C 109.5 . . ?
 H48A C48 H48B 109.5 . . ?
 H48A C48 H48C 109.5 . . ?
 H48B C48 H48C 109.5 . . ?
 Re2 C59 H59 124.2 . . ?
 C60 C59 Re2 70.4(3) . . ?
 C60 C59 H59 126.4 . . ?
 C60 C59 C63 107.2(5) . . ?
 C63 C59 Re2 70.6(3) . . ?
 C63 C59 H59 126.4 . . ?
 Re2 C60 H60 123.0 . . ?
 C59 C60 Re2 72.5(3) . . ?
 C59 C60 H60 126.0 . . ?
 C59 C60 C61 108.0(5) . . ?
 C61 C60 Re2 70.1(3) . . ?
 C61 C60 H60 126.0 . . ?
 Re2 C61 H61 121.7 . . ?
 C60 C61 Re2 72.3(3) . . ?
 C60 C61 H61 125.7 . . ?
 C60 C61 C62 108.5(5) . . ?
 C62 C61 Re2 71.9(3) . . ?
 C62 C61 H61 125.7 . . ?
 Re2 C62 H62 123.0 . . ?
 C61 C62 Re2 70.1(3) . . ?
 C61 C62 H62 126.6 . . ?
 C63 C62 Re2 72.0(3) . . ?
 C63 C62 C61 106.8(5) . . ?
 C63 C62 H62 126.6 . . ?
 Re2 C63 H63 123.1 . . ?
 C59 C63 Re2 72.2(3) . . ?
 C59 C63 H63 125.2 . . ?
 C62 C63 Re2 71.1(3) . . ?
 C62 C63 C59 109.5(5) . . ?
 C62 C63 H63 125.2 . . ?
 Re2 C64 H64 122.3 . . ?
 C65 C64 Re2 71.4(3) . . ?
 C65 C64 H64 126.0 . . ?
 C65 C64 C68 108.0(5) . . ?
 C68 C64 Re2 71.9(3) . . ?
 C68 C64 H64 126.0 . . ?
 Re2 C65 H65 123.9 . . ?
 C64 C65 Re2 71.2(3) . . ?
 C64 C65 H65 125.5 . . ?
 C64 C65 C66 109.0(5) . . ?
 C66 C65 Re2 70.9(3) . . ?
 C66 C65 H65 125.5 . . ?
 Re2 C66 H66 122.2 . . ?
 C65 C66 Re2 71.6(3) . . ?
 C65 C66 H66 126.1 . . ?
 C65 C66 C67 107.8(5) . . ?
 C67 C66 Re2 71.7(3) . . ?
 C67 C66 H66 126.1 . . ?
 Re2 C67 H67 123.7 . . ?
 C66 C67 Re2 70.3(3) . . ?
 C66 C67 H67 126.2 . . ?
 C66 C67 C68 107.5(5) . . ?
 C68 C67 Re2 71.4(3) . . ?
 C68 C67 H67 126.2 . . ?
 Re2 C68 H68 124.2 . . ?
 C64 C68 Re2 70.4(3) . . ?
 C64 C68 C67 107.6(4) . . ?
 C64 C68 H68 126.2 . . ?
 C67 C68 Re2 70.8(3) . . ?
 C67 C68 H68 126.2 . . ?

loop_
  _geom_torsion_atom_site_label_1
  _geom_torsion_atom_site_label_2
  _geom_torsion_atom_site_label_3
  _geom_torsion_atom_site_label_4
  _geom_torsion
  _geom_torsion_site_symmetry_1
  _geom_torsion_site_symmetry_2
  _geom_torsion_site_symmetry_3
  _geom_torsion_site_symmetry_4
  _geom_torsion_publ_flag
 Th1 N1 C1 C2 -23.3(5) . . . . ?
 Th1 N1 C3 C4 -35.4(4) . . . . ?
 Th1 N1 C5 C6 17.7(5) . . . . ?
 Th1 N2 C2 C1 -65.6(5) . . . . ?
 Th1 N3 C4 C3 -59.0(5) . . . . ?
 Th1 N4 C6 C5 66.6(5) . . . . ?
 Re1 C49 C50 C51 -61.7(4) . . . . ?
 Re1 C49 C52 C53 62.5(4) . . . . ?
 Re1 C50 C51 C53 -61.5(3) . . . . ?
 Re1 C51 C53 C52 -62.6(4) . . . . ?
 Re1 C52 C53 C51 63.5(3) . . . . ?
 Re1 C54 C55 C56 63.0(4) . . . . ?
 Re1 C54 C58 C57 -64.0(3) . . . . ?
 Re1 C55 C56 C57 62.1(3) . . . . ?
 Re1 C56 C57 C58 60.8(3) . . . . ?
 Re1 C57 C58 C54 63.9(4) . . . . ?
 Si1 N2 C2 C1 121.8(4) . . . . ?
 Si2 N3 C4 C3 117.9(4) . . . . ?
 Si3 N4 C6 C5 -117.9(4) . . . . ?
 N1 C1 C2 N2 57.4(5) . . . . ?
 N1 C3 C4 N3 67.8(5) . . . . ?
 N1 C5 C6 N4 -54.0(6) . . . . ?
 C1 N1 C3 C4 80.7(5) . . . . ?
 C1 N1 C5 C6 -101.1(5) . . . . ?
 C3 N1 C1 C2 -136.3(4) . . . . ?
 C3 N1 C5 C6 130.9(5) . . . . ?
 C5 N1 C1 C2 95.5(5) . . . . ?
 C5 N1 C3 C4 -151.7(4) . . . . ?
 C7 Si1 N2 Th1 7.8(4) . . . . ?
 C7 Si1 N2 C2 178.4(4) . . . . ?
 C8 Si1 N2 Th1 -109.8(3) . . . . ?
 C8 Si1 N2 C2 60.7(4) . . . . ?
 C9 Si1 N2 Th1 127.4(3) . . . . ?
 C9 Si1 N2 C2 -62.0(4) . . . . ?
 C13 Si2 N3 Th1 12.2(5) . . . . ?
 C13 Si2 N3 C4 -163.1(4) . . . . ?
 C14 Si2 N3 Th1 129.5(4) . . . . ?
 C14 Si2 N3 C4 -45.7(4) . . . . ?
 C15 Si2 N3 Th1 -109.0(4) . . . . ?
 C15 Si2 N3 C4 75.8(4) . . . . ?
 C19 Si3 N4 Th1 126.9(3) . . . . ?
 C19 Si3 N4 C6 -47.2(5) . . . . ?
 C20 Si3 N4 Th1 9.6(4) . . . . ?
 C20 Si3 N4 C6 -164.5(4) . . . . ?
 C21 Si3 N4 Th1 -110.6(3) . . . . ?
 C21 Si3 N4 C6 75.3(4) . . . . ?
 C49 C50 C51 Re1 61.1(4) . . . . ?
 C49 C50 C51 C53 -0.4(6) . . . . ?
 C49 C52 C53 Re1 -62.5(4) . . . . ?
 C49 C52 C53 C51 1.0(6) . . . . ?
 C50 C49 C52 Re1 -63.7(4) . . . . ?
 C50 C49 C52 C53 -1.2(6) . . . . ?
 C50 C51 C53 Re1 62.2(3) . . . . ?
 C50 C51 C53 C52 -0.4(6) . . . . ?
 C52 C49 C50 Re1 62.7(4) . . . . ?
 C52 C49 C50 C51 1.0(6) . . . . ?
 C54 C55 C56 Re1 -63.0(4) . . . . ?
 C54 C55 C56 C57 -0.9(6) . . . . ?
 C55 C54 C58 Re1 60.9(4) . . . . ?
 C55 C54 C58 C57 -3.1(6) . . . . ?
 C55 C56 C57 Re1 -61.8(4) . . . . ?
 C55 C56 C57 C58 -1.0(6) . . . . ?
 C56 C57 C58 Re1 -61.3(3) . . . . ?
 C56 C57 C58 C54 2.5(6) . . . . ?
 C58 C54 C55 Re1 -60.5(4) . . . . ?
 C58 C54 C55 C56 2.5(6) . . . . ?
 Th2 N5 C25 C26 -30.1(4) . . . . ?
 Th2 N5 C27 C28 -41.0(4) . . . . ?
 Th2 N5 C29 C30 6.9(4) . . . . ?
 Th2 N6 C26 C25 -58.4(4) . . . . ?
 Th2 N7 C28 C27 -49.8(4) . . . . ?
 Th2 N8 C30 C29 75.7(4) . . . . ?
 Re2 C59 C60 C61 61.5(3) . . . . ?
 Re2 C59 C63 C62 -61.7(3) . . . . ?
 Re2 C60 C61 C62 63.2(3) . . . . ?
 Re2 C61 C62 C63 63.1(3) . . . . ?
 Re2 C62 C63 C59 62.3(3) . . . . ?
 Re2 C64 C65 C66 61.2(3) . . . . ?
 Re2 C64 C68 C67 -61.4(3) . . . . ?
 Re2 C65 C66 C67 63.0(3) . . . . ?
 Re2 C66 C67 C68 62.1(3) . . . . ?
 Re2 C67 C68 C64 61.1(3) . . . . ?
 Si4 N6 C26 C25 124.3(4) . . . . ?
 Si5 N7 C28 C27 128.5(4) . . . . ?
 Si6 N8 C30 C29 -114.7(4) . . . . ?
 N5 C25 C26 N6 56.4(5) . . . . ?
 N5 C27 C28 N7 66.2(5) . . . . ?
 N5 C29 C30 N8 -53.0(5) . . . . ?
 N7 Si5 C39 C40 179.9(4) . . . . ?
 N7 Si5 C39 C41 -60.1(5) . . . . ?
 N7 Si5 C39 C42 59.1(5) . . . . ?
 C25 N5 C27 C28 77.0(5) . . . . ?
 C25 N5 C29 C30 -113.4(4) . . . . ?
 C27 N5 C25 C26 -142.8(4) . . . . ?
 C27 N5 C29 C30 118.2(4) . . . . ?
 C29 N5 C25 C26 88.1(5) . . . . ?
 C29 N5 C27 C28 -155.4(4) . . . . ?
 C31 Si4 N6 Th2 -1.5(4) . . . . ?
 C31 Si4 N6 C26 175.4(4) . . . . ?
 C32 Si4 N6 Th2 -118.8(3) . . . . ?
 C32 Si4 N6 C26 58.1(4) . . . . ?
 C33 Si4 N6 Th2 118.8(3) . . . . ?
 C33 Si4 N6 C26 -64.3(4) . . . . ?
 C37 Si5 N7 Th2 13.1(4) . . . . ?
 C37 Si5 N7 C28 -164.3(3) . . . . ?
 C37 Si5 C39 C40 56.8(5) . . . . ?
 C37 Si5 C39 C41 176.8(4) . . . . ?
 C37 Si5 C39 C42 -64.0(5) . . . . ?
 C38 Si5 N7 Th2 129.1(4) . . . . ?
 C38 Si5 N7 C28 -48.4(4) . . . . ?
 C38 Si5 C39 C40 -55.7(5) . . . . ?
 C38 Si5 C39 C41 64.3(5) . . . . ?
 C38 Si5 C39 C42 -176.4(4) . . . . ?
 C39 Si5 N7 Th2 -107.6(4) . . . . ?
 C39 Si5 N7 C28 74.9(4) . . . . ?
 C43 Si6 N8 Th2 108.5(4) . . . . ?
 C43 Si6 N8 C30 -55.7(5) . . . . ?
 C44 Si6 N8 Th2 -8.9(5) . . . . ?
 C44 Si6 N8 C30 -173.1(4) . . . . ?
 C45 Si6 N8 Th2 -129.2(4) . . . . ?
 C45 Si6 N8 C30 66.7(4) . . . . ?
 C59 C60 C61 Re2 -63.1(3) . . . . ?
 C59 C60 C61 C62 0.1(6) . . . . ?
 C60 C59 C63 Re2 61.3(3) . . . . ?
 C60 C59 C63 C62 -0.4(5) . . . . ?
 C60 C61 C62 Re2 -63.4(3) . . . . ?
 C60 C61 C62 C63 -0.4(5) . . . . ?
 C61 C62 C63 Re2 -61.9(3) . . . . ?
 C61 C62 C63 C59 0.5(5) . . . . ?
 C63 C59 C60 Re2 -61.4(3) . . . . ?
 C63 C59 C60 C61 0.1(5) . . . . ?
 C64 C65 C66 Re2 -61.4(3) . . . . ?
 C64 C65 C66 C67 1.7(6) . . . . ?
 C65 C64 C68 Re2 62.7(3) . . . . ?
 C65 C64 C68 C67 1.3(5) . . . . ?
 C65 C66 C67 Re2 -63.0(3) . . . . ?
 C65 C66 C67 C68 -0.9(5) . . . . ?
 C66 C67 C68 Re2 -61.4(3) . . . . ?
 C66 C67 C68 C64 -0.3(5) . . . . ?
 C68 C64 C65 Re2 -63.0(3) . . . . ?
 C68 C64 C65 C66 -1.9(6) . . . . ?

_shelx_res_file
;
TITL thjo9_a.res in P2(1)/c
    thjo9.res
    created by SHELXL-2018/3 at 09:49:02 on 26-Apr-2018
REM Old TITL RSTL173 in P2(1)/c
REM SHELXT solution in P2(1)/c: R1 0.073, Rweak 0.006, Alpha 0.050
REM <I/s> 0.773 for 632 systematic absences, Orientation as input
REM Formula found by SHELXT: C90 N17 Si6 Re2 Th2
rem EXTI 0.00005
CELL 1.54184 26.6348 15.8017 20.0442 90 108.307 90
ZERR 8 0.0002 0.0001 0.0001 0 0.001 0
LATT 1
SYMM -X,0.5+Y,0.5-Z
SFAC C H N Re Si Th
UNIT 272 536 32 8 24 8

L.S. 20
PLAN  20
SIZE 0.077 0.123 0.149
TEMP -123(2)
FREE Th1 C57
FREE Th1 C56
FREE Th1 C4
FREE Th2 C30
FREE Th2 C68
FREE Th2 H68
BOND
list 4
CONF
BOND $H
fmap 2
acta
REM <olex2.extras>
REM <HklSrc "%.\\THJO9.hkl">
REM </olex2.extras>

WGHT    0.038600   26.352600
FVAR       0.09921
TH1   6    0.081980    0.696441    0.347708    11.00000    0.02401    0.02199 =
         0.02024    0.00056    0.00745   -0.00078
RE1   4    0.115089    0.555276    0.461385    11.00000    0.03157    0.02208 =
         0.02398    0.00245    0.00697   -0.00106
SI1   5   -0.055682    0.688384    0.356080    11.00000    0.02547    0.03218 =
         0.02988   -0.00143    0.01110   -0.00336
SI2   5    0.135646    0.919735    0.407432    11.00000    0.03063    0.02249 =
         0.02734   -0.00028    0.00972   -0.00251
SI3   5    0.194082    0.632375    0.283394    11.00000    0.02949    0.03021 =
         0.02901    0.00229    0.01293    0.00351
N1    3    0.038899    0.761681    0.216616    11.00000    0.03034    0.03175 =
         0.02639    0.00322    0.00985    0.00071
N2    3   -0.009566    0.689727    0.311107    11.00000    0.02292    0.02818 =
         0.02916   -0.00064    0.00963   -0.00155
N3    3    0.093507    0.843358    0.358254    11.00000    0.02806    0.02224 =
         0.03263    0.00254    0.00618    0.00119
N4    3    0.128460    0.654724    0.272247    11.00000    0.02706    0.02988 =
         0.02627   -0.00101    0.01129    0.00078
C1    1   -0.018804    0.746440    0.194647    11.00000    0.02932    0.04331 =
         0.02395   -0.00046    0.00533   -0.00139
AFIX  23
H1A   2   -0.031950    0.734140    0.143659    11.00000   -1.20000
H1B   2   -0.037081    0.797736    0.203527    11.00000   -1.20000
AFIX   0
C2    1   -0.030874    0.672182    0.235350    11.00000    0.02950    0.03742 =
         0.03205   -0.00964    0.00828   -0.00942
AFIX  23
H2A   2   -0.069584    0.663439    0.221875    11.00000   -1.20000
H2B   2   -0.014652    0.619984    0.224029    11.00000   -1.20000
AFIX   0
C3    1    0.052355    0.852147    0.226750    11.00000    0.03534    0.03505 =
         0.03063    0.00767    0.00458    0.00140
AFIX  23
H3A   2    0.026981    0.885583    0.189328    11.00000   -1.20000
H3B   2    0.088210    0.861583    0.223325    11.00000   -1.20000
AFIX   0
C4    1    0.050594    0.881742    0.298649    11.00000    0.02882    0.02754 =
         0.04070    0.00255    0.00350    0.00384
AFIX  23
H4A   2    0.053974    0.944138    0.301329    11.00000   -1.20000
H4B   2    0.015845    0.866682    0.303556    11.00000   -1.20000
AFIX   0
C5    1    0.064237    0.718851    0.168519    11.00000    0.03716    0.05399 =
         0.02507    0.00273    0.01139    0.00585
AFIX  23
H5A   2    0.090610    0.757235    0.159110    11.00000   -1.20000
H5B   2    0.036996    0.705895    0.123176    11.00000   -1.20000
AFIX   0
C6    1    0.090881    0.638427    0.201229    11.00000    0.03802    0.03967 =
         0.02975   -0.00613    0.01270   -0.00040
AFIX  23
H6A   2    0.063837    0.597178    0.204707    11.00000   -1.20000
H6B   2    0.110135    0.613547    0.170993    11.00000   -1.20000
AFIX   0
C7    1   -0.018639    0.709101    0.450765    11.00000    0.03964    0.05322 =
         0.03219   -0.00018    0.01484   -0.00798
AFIX 137
H7A   2    0.007208    0.663836    0.468892    11.00000   -1.50000
H7B   2   -0.043523    0.710810    0.477836    11.00000   -1.50000
H7C   2   -0.000214    0.763498    0.455121    11.00000   -1.50000
AFIX   0
C8    1   -0.088082    0.582012    0.349922    11.00000    0.04737    0.04595 =
         0.04959   -0.00874    0.02618   -0.01569
AFIX 137
H8A   2   -0.106496    0.568658    0.300523    11.00000   -1.50000
H8B   2   -0.113569    0.582924    0.376110    11.00000   -1.50000
H8C   2   -0.061110    0.538877    0.369914    11.00000   -1.50000
AFIX   0
C9    1   -0.110675    0.770715    0.326995    11.00000    0.03279    0.05092 =
         0.04300    0.00129    0.01335    0.00787
C10   1   -0.087035    0.860798    0.338350    11.00000    0.05070    0.04517 =
         0.08470    0.01008    0.03356    0.01353
AFIX 137
H10A  2   -0.064514    0.867040    0.387234    11.00000   -1.50000
H10B  2   -0.115715    0.902451    0.328141    11.00000   -1.50000
H10C  2   -0.065873    0.870074    0.306881    11.00000   -1.50000
AFIX   0
C11   1   -0.144497    0.761895    0.249257    11.00000    0.04357    0.10838 =
         0.04769    0.00314    0.00658    0.02523
AFIX 137
H11A  2   -0.122428    0.772588    0.219171    11.00000   -1.50000
H11B  2   -0.173505    0.802989    0.238448    11.00000   -1.50000
H11C  2   -0.159055    0.704502    0.240739    11.00000   -1.50000
AFIX   0
C12   1   -0.147524    0.760718    0.371979    11.00000    0.03550    0.06163 =
         0.06869   -0.01020    0.02775   -0.00054
AFIX 137
H12A  2   -0.163789    0.704437    0.364275    11.00000   -1.50000
H12B  2   -0.175220    0.804042    0.358650    11.00000   -1.50000
H12C  2   -0.127084    0.767294    0.421725    11.00000   -1.50000
AFIX   0
C13   1    0.199630    0.871862    0.464108    11.00000    0.03611    0.02944 =
         0.04373    0.00049    0.00212   -0.00011
AFIX 137
H13A  2    0.193377    0.840880    0.503111    11.00000   -1.50000
H13B  2    0.225518    0.916918    0.482804    11.00000   -1.50000
H13C  2    0.213272    0.832892    0.435885    11.00000   -1.50000
AFIX   0
C14   1    0.154758    0.998034    0.348863    11.00000    0.04132    0.03815 =
         0.04079    0.00407    0.01898   -0.00292
AFIX 137
H14A  2    0.168879    0.967685    0.316019    11.00000   -1.50000
H14B  2    0.181789    1.036531    0.377653    11.00000   -1.50000
H14C  2    0.123556    1.030648    0.322427    11.00000   -1.50000
AFIX   0
C15   1    0.105961    0.981688    0.468089    11.00000    0.04267    0.03430 =
         0.03625    0.00657    0.01806    0.00487
C16   1    0.150290    1.032532    0.520939    11.00000    0.08725    0.06983 =
         0.07931   -0.04037    0.04366   -0.02639
AFIX 137
H16A  2    0.177843    0.993685    0.548071    11.00000   -1.50000
H16B  2    0.135622    1.063551    0.552896    11.00000   -1.50000
H16C  2    0.165588    1.072685    0.495450    11.00000   -1.50000
AFIX   0
C17   1    0.062218    1.040439    0.428683    11.00000    0.11647    0.08417 =
         0.05225    0.02378    0.04427    0.06710
AFIX 137
H17A  2    0.075563    1.079808    0.400434    11.00000   -1.50000
H17B  2    0.049624    1.072396    0.462198    11.00000   -1.50000
H17C  2    0.032985    1.007368    0.397757    11.00000   -1.50000
AFIX   0
C18   1    0.083731    0.921080    0.510796    11.00000    0.07584    0.04218 =
         0.05007    0.00389    0.04038    0.00387
AFIX 137
H18A  2    0.055765    0.886616    0.478936    11.00000   -1.50000
H18B  2    0.069082    0.953516    0.542032    11.00000   -1.50000
H18C  2    0.112038    0.884104    0.538903    11.00000   -1.50000
AFIX   0
C19   1    0.202927    0.525286    0.246878    11.00000    0.05338    0.03345 =
         0.06312   -0.00645    0.02531    0.00546
AFIX 137
H19A  2    0.190622    0.481125    0.272360    11.00000   -1.50000
H19B  2    0.240422    0.516271    0.252404    11.00000   -1.50000
H19C  2    0.182328    0.522863    0.196910    11.00000   -1.50000
AFIX   0
C20   1    0.231647    0.628042    0.379613    11.00000    0.03364    0.06969 =
         0.03614    0.01108    0.01254    0.00863
AFIX 137
H20A  2    0.235440    0.685372    0.399220    11.00000   -1.50000
H20B  2    0.266746    0.603751    0.386319    11.00000   -1.50000
H20C  2    0.212397    0.592736    0.403609    11.00000   -1.50000
AFIX   0
C21   1    0.227142    0.714488    0.241723    11.00000    0.03199    0.04166 =
         0.03426    0.00446    0.01778   -0.00002
C22   1    0.287468    0.701573    0.267808    11.00000    0.03010    0.06628 =
         0.04592    0.00341    0.01826   -0.00368
AFIX 137
H22A  2    0.301045    0.713117    0.318355    11.00000   -1.50000
H22B  2    0.304044    0.740331    0.242796    11.00000   -1.50000
H22C  2    0.295727    0.643047    0.258881    11.00000   -1.50000
AFIX   0
C23   1    0.208618    0.707799    0.161612    11.00000    0.04122    0.05347 =
         0.03395    0.01128    0.01442    0.00087
AFIX 137
H23A  2    0.216649    0.651179    0.147777    11.00000   -1.50000
H23B  2    0.226936    0.750318    0.142187    11.00000   -1.50000
H23C  2    0.170388    0.717610    0.143496    11.00000   -1.50000
AFIX   0
C24   1    0.214359    0.802467    0.262141    11.00000    0.05472    0.03661 =
         0.06379   -0.00429    0.03037   -0.01391
AFIX 137
H24A  2    0.175913    0.809344    0.249039    11.00000   -1.50000
H24B  2    0.228869    0.844863    0.237565    11.00000   -1.50000
H24C  2    0.230041    0.810000    0.313000    11.00000   -1.50000
AFIX   0
C49   1    0.129389    0.440404    0.405751    11.00000    0.04886    0.02201 =
         0.04492   -0.00577    0.01722    0.00139
AFIX  43
H49   2    0.163931    0.423216    0.407372    11.00000   -1.20000
AFIX   0
C50   1    0.094831    0.494595    0.354869    11.00000    0.05247    0.01942 =
         0.02763   -0.00235    0.01127   -0.00295
AFIX  43
H50   2    0.102300    0.519402    0.315855    11.00000   -1.20000
AFIX   0
C51   1    0.047055    0.505522    0.372160    11.00000    0.03998    0.02577 =
         0.03523   -0.00524   -0.00054   -0.00505
AFIX  43
H51   2    0.017399    0.538783    0.347171    11.00000   -1.20000
AFIX   0
C52   1    0.102280    0.417188    0.453355    11.00000    0.05572    0.01473 =
         0.03900    0.00562    0.01074   -0.00151
AFIX  43
H52   2    0.115743    0.380350    0.492357    11.00000   -1.20000
AFIX   0
C53   1    0.052408    0.456687    0.434457    11.00000    0.03901    0.02661 =
         0.04167   -0.00321    0.00991   -0.01506
AFIX  43
H53   2    0.026959    0.451920    0.458496    11.00000   -1.20000
AFIX   0
C54   1    0.160979    0.571924    0.573612    11.00000    0.04379    0.04095 =
         0.01847    0.00599   -0.00094   -0.00601
AFIX  43
H54   2    0.170289    0.527303    0.607010    11.00000   -1.20000
AFIX   0
C55   1    0.191900    0.600304    0.532111    11.00000    0.02811    0.03449 =
         0.03576   -0.00136    0.00240   -0.00376
AFIX  43
H55   2    0.224629    0.577135    0.531355    11.00000   -1.20000
AFIX   0
C56   1    0.164729    0.670193    0.491640    11.00000    0.03832    0.02959 =
         0.02798    0.00250    0.00278   -0.00787
AFIX  43
H56   2    0.176458    0.702494    0.459402    11.00000   -1.20000
AFIX   0
C57   1    0.116556    0.683306    0.508048    11.00000    0.04086    0.02909 =
         0.02684   -0.00591    0.00791   -0.00172
AFIX  43
H57   2    0.090989    0.726144    0.489284    11.00000   -1.20000
AFIX   0
C58   1    0.114247    0.620164    0.557664    11.00000    0.04668    0.03475 =
         0.02773   -0.00771    0.01517   -0.01458
AFIX  43
H58   2    0.086117    0.612009    0.576674    11.00000   -1.20000
AFIX   0

TH2   6    0.428294    0.278533    0.400501    11.00000    0.02462    0.02179 =
         0.01800   -0.00117    0.00824   -0.00244
RE2   4    0.402444    0.442011    0.307648    11.00000    0.03231    0.02155 =
         0.02124   -0.00146    0.01098   -0.00223
SI4   5    0.315645    0.322297    0.465923    11.00000    0.02521    0.02799 =
         0.02345    0.00043    0.01003   -0.00054
SI5   5    0.394963    0.066918    0.299822    11.00000    0.03241    0.02162 =
         0.02119   -0.00233    0.00876    0.00110
SI6   5    0.570877    0.280394    0.399679    11.00000    0.02754    0.03779 =
         0.02987   -0.00453    0.01452   -0.00729
N5    3    0.471259    0.192540    0.521563    11.00000    0.02410    0.02689 =
         0.02303   -0.00084    0.00652   -0.00140
N6    3    0.381624    0.297173    0.480571    11.00000    0.02810    0.02739 =
         0.02102   -0.00177    0.00837   -0.00145
N7    3    0.410971    0.135102    0.371949    11.00000    0.03034    0.02304 =
         0.02241   -0.00014    0.00806   -0.00376
N8    3    0.519733    0.279339    0.435612    11.00000    0.02072    0.03089 =
         0.02804   -0.00093    0.01055   -0.00313
C25   1    0.439279    0.204835    0.569140    11.00000    0.02572    0.03561 =
         0.02238    0.00386    0.00970   -0.00121
AFIX  23
H25A  2    0.462189    0.200768    0.618625    11.00000   -1.20000
H25B  2    0.411914    0.160192    0.560731    11.00000   -1.20000
AFIX   0
C26   1    0.413410    0.290504    0.555891    11.00000    0.03046    0.03353 =
         0.02161   -0.00474    0.00850   -0.00191
AFIX  23
H26A  2    0.390281    0.298094    0.585636    11.00000   -1.20000
H26B  2    0.440749    0.335340    0.568046    11.00000   -1.20000
AFIX   0
C27   1    0.469293    0.104343    0.495813    11.00000    0.03389    0.02657 =
         0.02251    0.00069    0.00743   -0.00210
AFIX  23
H27A  2    0.473137    0.064806    0.535423    11.00000   -1.20000
H27B  2    0.499238    0.094650    0.477426    11.00000   -1.20000
AFIX   0
C28   1    0.417519    0.086127    0.438080    11.00000    0.03802    0.02638 =
         0.02419   -0.00174    0.01153   -0.00391
AFIX  23
H28A  2    0.415734    0.024921    0.427032    11.00000   -1.20000
H28B  2    0.387712    0.099670    0.455829    11.00000   -1.20000
AFIX   0
C29   1    0.525599    0.225648    0.553268    11.00000    0.02125    0.04226 =
         0.02644   -0.00235    0.00673   -0.00742
AFIX  23
H29A  2    0.551701    0.181011    0.553350    11.00000   -1.20000
H29B  2    0.530938    0.242930    0.602491    11.00000   -1.20000
AFIX   0
C30   1    0.533532    0.301514    0.510610    11.00000    0.02876    0.03577 =
         0.03050   -0.00715    0.01174   -0.00685
AFIX  23
H30A  2    0.511042    0.349027    0.516435    11.00000   -1.20000
H30B  2    0.570885    0.320109    0.528188    11.00000   -1.20000
AFIX   0
C31   1    0.283632    0.336555    0.369414    11.00000    0.03018    0.05736 =
         0.02677    0.00759    0.00746    0.00214
AFIX 137
H31A  2    0.304071    0.377191    0.351500    11.00000   -1.50000
H31B  2    0.247563    0.357872    0.360481    11.00000   -1.50000
H31C  2    0.282454    0.282088    0.345588    11.00000   -1.50000
AFIX   0
C32   1    0.308939    0.425229    0.509157    11.00000    0.03566    0.03515 =
         0.04642   -0.00429    0.01629    0.00271
AFIX 137
H32A  2    0.328134    0.421795    0.559556    11.00000   -1.50000
H32B  2    0.271472    0.436530    0.502292    11.00000   -1.50000
H32C  2    0.323710    0.471085    0.488187    11.00000   -1.50000
AFIX   0
C33   1    0.275591    0.238882    0.497185    11.00000    0.02668    0.03984 =
         0.03099    0.00493    0.01195    0.00332
C34   1    0.292874    0.229713    0.577388    11.00000    0.04377    0.08215 =
         0.03591    0.02742    0.01201   -0.00394
AFIX 137
H34A  2    0.328950    0.207160    0.594175    11.00000   -1.50000
H34B  2    0.268827    0.190911    0.590469    11.00000   -1.50000
H34C  2    0.291888    0.285210    0.598766    11.00000   -1.50000
AFIX   0
C35   1    0.280009    0.151909    0.464448    11.00000    0.05611    0.03473 =
         0.10614   -0.01131    0.04545   -0.01524
AFIX 137
H35A  2    0.264447    0.155268    0.413254    11.00000   -1.50000
H35B  2    0.261052    0.109374    0.482879    11.00000   -1.50000
H35C  2    0.317335    0.135858    0.476422    11.00000   -1.50000
AFIX   0
C36   1    0.217535    0.265210    0.473578    11.00000    0.02470    0.05404 =
         0.05424    0.01346    0.01705    0.00316
AFIX 137
H36A  2    0.213808    0.319082    0.495785    11.00000   -1.50000
H36B  2    0.196547    0.221657    0.487413    11.00000   -1.50000
H36C  2    0.204964    0.271800    0.422375    11.00000   -1.50000
AFIX   0
C37   1    0.404668    0.119275    0.220955    11.00000    0.04942    0.03209 =
         0.02825   -0.00400    0.01924   -0.00424
AFIX 137
H37A  2    0.378162    0.163923    0.204112    11.00000   -1.50000
H37B  2    0.400770    0.077218    0.183734    11.00000   -1.50000
H37C  2    0.440152    0.144085    0.233748    11.00000   -1.50000
AFIX   0
C38   1    0.440874   -0.027462    0.316835    11.00000    0.05959    0.03978 =
         0.03642   -0.00354    0.00952    0.01414
AFIX 137
H38A  2    0.477448   -0.008319    0.337916    11.00000   -1.50000
H38B  2    0.437400   -0.056417    0.272372    11.00000   -1.50000
H38C  2    0.431574   -0.066574    0.349037    11.00000   -1.50000
AFIX   0
C39   1    0.324270    0.028546    0.273418    11.00000    0.04084    0.03928 =
         0.03102   -0.00694    0.00958   -0.01436
C40   1    0.313437   -0.031086    0.209398    11.00000    0.06725    0.05946 =
         0.03716   -0.01635    0.01826   -0.03358
AFIX 137
H40A  2    0.319959   -0.000795    0.170257    11.00000   -1.50000
H40B  2    0.276547   -0.050015    0.195375    11.00000   -1.50000
H40C  2    0.336931   -0.080287    0.221937    11.00000   -1.50000
AFIX   0
C41   1    0.313505   -0.020215    0.334401    11.00000    0.05754    0.05723 =
         0.04144   -0.01151    0.02169   -0.03205
AFIX 137
H41A  2    0.337447   -0.068839    0.347352    11.00000   -1.50000
H41B  2    0.276796   -0.040096    0.319470    11.00000   -1.50000
H41C  2    0.319448    0.017381    0.375035    11.00000   -1.50000
AFIX   0
C42   1    0.285932    0.103583    0.254765    11.00000    0.03292    0.05740 =
         0.07685    0.00382    0.01270   -0.00304
AFIX 137
H42A  2    0.293500    0.142306    0.294902    11.00000   -1.50000
H42B  2    0.249523    0.082881    0.243352    11.00000   -1.50000
H42C  2    0.290258    0.133547    0.214113    11.00000   -1.50000
AFIX   0
C43   1    0.604235    0.385737    0.413590    11.00000    0.07735    0.05456 =
         0.09133   -0.01667    0.05964   -0.03265
AFIX 137
H43A  2    0.579785    0.428737    0.386359    11.00000   -1.50000
H43B  2    0.635642    0.383439    0.398111    11.00000   -1.50000
H43C  2    0.614797    0.400356    0.463606    11.00000   -1.50000
AFIX   0
C44   1    0.542751    0.263736    0.302793    11.00000    0.03967    0.09170 =
         0.03463    0.00532    0.01847    0.00409
AFIX 137
H44A  2    0.524397    0.209149    0.293584    11.00000   -1.50000
H44B  2    0.571396    0.264062    0.281817    11.00000   -1.50000
H44C  2    0.517702    0.309257    0.282138    11.00000   -1.50000
AFIX   0
C45   1    0.623886    0.195631    0.435320    11.00000    0.02906    0.07224 =
         0.04519    0.00598    0.01938    0.00547
C46   1    0.654390    0.210872    0.513034    11.00000    0.04110    0.15423 =
         0.04292    0.01859    0.01086    0.01596
AFIX 137
H46A  2    0.671872    0.266168    0.518389    11.00000   -1.50000
H46B  2    0.681038    0.166436    0.529905    11.00000   -1.50000
H46C  2    0.629762    0.209758    0.540495    11.00000   -1.50000
AFIX   0
C47   1    0.664290    0.198412    0.394602    11.00000    0.04139    0.10100 =
         0.06298    0.01229    0.03311    0.01360
AFIX 137
H47A  2    0.646252    0.186670    0.344802    11.00000   -1.50000
H47B  2    0.691732    0.155688    0.413644    11.00000   -1.50000
H47C  2    0.680566    0.254645    0.399485    11.00000   -1.50000
AFIX   0
C48   1    0.598734    0.106941    0.426018    11.00000    0.07173    0.05071 =
         0.10817    0.01610    0.06015    0.02120
AFIX 137
H48A  2    0.573321    0.103491    0.452224    11.00000   -1.50000
H48B  2    0.626414    0.064270    0.443852    11.00000   -1.50000
H48C  2    0.580453    0.096594    0.376055    11.00000   -1.50000
AFIX   0
C59   1    0.469112    0.479792    0.403997    11.00000    0.04124    0.03304 =
         0.02285   -0.01048    0.00243   -0.00243
AFIX  43
H59   2    0.499363    0.445817    0.425135    11.00000   -1.20000
AFIX   0
C60   1    0.463618    0.541124    0.350151    11.00000    0.04303    0.02582 =
         0.03774   -0.00878    0.01535   -0.01630
AFIX  43
H60   2    0.489653    0.555383    0.328750    11.00000   -1.20000
AFIX   0
C61   1    0.412132    0.577402    0.333989    11.00000    0.04816    0.01894 =
         0.03235   -0.00171    0.01206   -0.00452
AFIX  43
H61   2    0.397973    0.620002    0.299805    11.00000   -1.20000
AFIX   0
C62   1    0.385276    0.538660    0.378124    11.00000    0.03989    0.03060 =
         0.02888   -0.01268    0.01356   -0.00158
AFIX  43
H62   2    0.350506    0.550968    0.378717    11.00000   -1.20000
AFIX   0
C63   1    0.420434    0.478903    0.420353    11.00000    0.04541    0.03005 =
         0.02204   -0.01169    0.01043   -0.01096
AFIX  43
H63   2    0.413017    0.443497    0.454401    11.00000   -1.20000
AFIX   0
C64   1    0.328978    0.400987    0.227506    11.00000    0.02649    0.03571 =
         0.02647   -0.00522    0.00314   -0.00082
AFIX  43
H64   2    0.294964    0.415388    0.229926    11.00000   -1.20000
AFIX   0
C65   1    0.359066    0.448834    0.194218    11.00000    0.05702    0.03408 =
         0.01127    0.00469    0.00079   -0.00067
AFIX  43
H65   2    0.348148    0.500236    0.169299    11.00000   -1.20000
AFIX   0
C66   1    0.408005    0.407933    0.203953    11.00000    0.05297    0.04541 =
         0.02640   -0.01261    0.02426   -0.01038
AFIX  43
H66   2    0.435885    0.427599    0.187862    11.00000   -1.20000
AFIX   0
C67   1    0.408093    0.331354    0.242495    11.00000    0.04200    0.02479 =
         0.03032   -0.01299    0.01322   -0.00133
AFIX  43
H67   2    0.435813    0.290850    0.256007    11.00000   -1.20000
AFIX   0
C68   1    0.358659    0.327131    0.256904    11.00000    0.03866    0.02173 =
         0.02069   -0.00126    0.00424   -0.00334
AFIX  43
H68   2    0.347664    0.283181    0.281530    11.00000   -1.20000
AFIX   0
HKLF 4


REM  thjo9_a.res in P2(1)/c
REM wR2 = 0.0791, GooF = S = 1.058, Restrained GooF = 1.058 for all data
REM R1 = 0.0307 for 15534 Fo > 4sig(Fo) and 0.0330 for all 16480 data
REM 805 parameters refined using 0 restraints

END

WGHT      0.0387     26.2292

REM Highest difference peak  4.780,  deepest hole -1.899,  1-sigma level  0.135
Q1    1   0.4200  0.1973  0.4007  11.00000  0.05    4.78
Q2    1   0.0717  0.7797  0.3442  11.00000  0.05    3.06
Q3    1   0.1012  0.9395  0.4372  11.00000  0.05    2.40
Q4    1   0.0838  0.5650  0.4491  11.00000  0.05    1.48
Q5    1   0.1280  0.6965  0.3701  11.00000  0.05    1.21
Q6    1   0.1282  0.5596  0.4339  11.00000  0.05    1.20
Q7    1   0.3833  0.2829  0.3770  11.00000  0.05    1.07
Q8    1   0.4735  0.2791  0.4171  11.00000  0.05    0.98
Q9    1   0.3828  0.0424  0.2899  11.00000  0.05    0.97
Q10   1   0.1614  0.5392  0.4833  11.00000  0.05    0.92
Q11   1   0.4404  0.4319  0.3212  11.00000  0.05    0.92
Q12   1   0.3594  0.4494  0.2917  11.00000  0.05    0.91
Q13   1   0.0368  0.6984  0.3272  11.00000  0.05    0.88
Q14   1   0.0861  0.6172  0.3539  11.00000  0.05    0.84
Q15   1   0.4182  0.3551  0.3072  11.00000  0.05    0.78
Q16   1   0.4497  0.3575  0.4065  11.00000  0.05    0.74
Q17   1   0.1916  0.6998  0.2568  11.00000  0.05    0.73
Q18   1   0.4270  0.3687  0.4024  11.00000  0.05    0.69
Q19   1   0.4143  0.3589  0.3958  11.00000  0.05    0.68
Q20   1  -0.0668  0.7811  0.3469  11.00000  0.05    0.67
;
_shelx_res_checksum                18878
_shelx_hkl_file
;
   1   0   0    8.53    0.48
  -1   0   0    8.23    0.50
  -1   0   0    8.26    0.51
  -3   0   0  190.62    7.87
   3   0   0  200.01    7.87
  -3   0   0  186.41    7.88
  -5   0   0   17.81    1.77
  -5   0   0   17.98    1.91
  -6   0   0 9999.00  390.53
  -7   0   0  821.60   33.28
  -7   0   0  847.42   33.31
  -8   0   0 1350.90   53.52
  -8   0   0 1351.61   53.54
  -9   0   0  358.47   14.92
  -9   0   0  356.30   14.90
 -10   0   0 2857.53  112.43
 -11   0   0  441.55   18.41
 -12   0   0  608.28   24.96
 -13   0   0  227.22   10.30
 -14   0   0   76.28    4.63
 -15   0   0   43.10    3.40
 -16   0   0   69.11    4.39
 -17   0   0   34.15    3.20
  18   0   0  184.66    8.56
 -18   0   0  189.79    8.87
  18   0   0  166.46    8.51
 -19   0   0    6.33    2.49
  19   0   0    6.17    2.30
  19   0   0    4.81    2.01
  19   0   0    3.67    1.98
  20   0   0  344.28   15.02
 -20   0   0  347.28   15.31
  20   0   0  373.06   15.24
  20   0   0  312.19   15.01
 -21   0   0    7.40    2.38
  21   0   0    1.59    2.32
  21   0   0    4.01    2.62
  22   0   0  107.38    6.00
  22   0   0  103.28    6.07
 -22   0   0   99.63    5.94
  23   0   0  154.31    7.85
 -23   0   0  155.50    8.10
  23   0   0  154.31    8.04
  24   0   0   10.76    2.81
  25   0   0  618.57   25.84
  25   0   0  630.77   26.13
  26   0   0  252.56   11.55
  26   0   0  250.51   11.21
  27   0   0   14.16    2.04
  27   0   0   18.99    2.71
  28   0   0   46.74    3.05
  28   0   0   52.27    3.60
  29   0   0  781.02   27.84
  29   0   0  626.14   27.27
  30   0   0   25.65    1.71
  30   0   0   28.48    2.33
  31   0   0  316.56   13.27
 -31   0   0  330.27   13.39
   0  -1   0    3.02    0.31
   1   1   0   10.28    0.57
  -1  -1   0   10.88    0.58
  -1   1   0    9.37    0.54
  -3   1   0   20.83    1.36
  -3   1   0   18.53    1.39
  -3  -1   0   18.70    1.03
   3   1   0   20.61    1.34
  -4   1   0 1878.84   72.58
  -4   1   0 1820.88   72.57
  -5   1   0  132.93    6.02
  -5   1   0  137.38    5.99
  -6   1   0   73.66    3.82
  -6   1   0   79.46    3.93
  -7   1   0   51.14    3.07
  -7   1   0   50.98    2.92
  -8   1   0 5518.33  213.38
  -8   1   0 5385.89  213.37
  -9   1   0   13.93    1.93
  -9   1   0   12.15    2.14
 -10   1   0 1895.64   74.94
 -11   1   0  144.49    6.97
 -12   1   0   51.48    3.67
 -13   1   0   63.93    4.20
 -14   1   0  208.80    9.65
 -15   1   0    8.71    2.36
 -16   1   0  596.89   24.85
 -17   1   0    6.86    2.43
 -18   1   0  241.42   10.80
  18  -1   0  232.20   10.47
  18   1   0  213.83   10.42
  18   1   0  229.63   10.41
  19  -1   0  135.75    7.09
  19   1   0  135.66    7.25
  19   1   0  140.02    7.40
 -19   1   0  151.98    7.52
  19   1   0  143.29    7.10
  20   1   0  116.09    6.63
  20   1   0  113.32    6.32
 -20   1   0  123.78    6.73
  20   1   0  136.72    6.83
  20  -1   0  124.34    6.46
  21  -1   0  202.55    9.54
  21   1   0  216.10    9.89
 -21   1   0  191.76    9.71
  21   1   0  188.65    9.65
  21   1   0  204.17    9.54
 -22   1   0  388.26   17.32
  22   1   0  386.73   17.17
  22   1   0  395.37   17.25
  22  -1   0  401.55   17.02
  23  -1   0  101.16    5.65
  23   1   0  102.25    5.93
  23   1   0   97.95    5.96
 -23   1   0   96.97    5.90
  24  -1   0  212.23    9.73
  24   1   0  203.10    9.98
  25   1   0  143.56    7.45
  25  -1   0  141.56    7.08
  26   1   0    0.73    2.25
  26   1   0    0.85    1.79
  26  -1   0    0.80    1.76
  27   1   0  468.29   19.07
  27  -1   0  435.51   18.61
  27   1   0  447.59   18.72
  28  -1   0  131.76    6.25
  28   1   0  134.98    6.35
  28   1   0  140.06    6.78
  29   1   0    9.36    1.49
  29   1   0    8.90    1.96
  29  -1   0    8.94    1.35
  30   1   0   66.13    3.52
  30  -1   0   67.91    3.54
 -31   1   0   55.96    2.99
 -31   1   0   48.86    2.90
  31  -1   0   54.07    2.86
  31   1   0   51.01    2.80
   0  -2   0 1387.27   54.30
  -1  -2   0   28.09    1.38
   1  -2   0   26.49    1.36
  -1   2   0   24.53    1.13
  -1  -2   0   27.37    1.14
  -2   2   0  653.73   26.18
  -2   2   0  642.45   26.18
  -2  -2   0  659.17   26.19
  -2  -2   0  700.75   26.24
  -2  -2   0  685.28   26.20
  -3   2   0   25.00    1.48
  -3  -2   0   21.34    1.50
  -3   2   0   21.64    1.54
  -3  -2   0   22.64    1.44
  -3  -2   0   21.65    1.36
  -4  -2   0 1523.56   58.43
  -4   2   0 1456.73   58.58
  -4  -2   0 1447.69   58.57
  -4   2   0 1504.15   58.59
  -4  -2   0 1507.38   58.58
  -5   2   0    2.57    1.53
  -5  -2   0    2.01    1.37
  -5   2   0    1.66    1.37
  -5  -2   0    1.56    1.50
  -5  -2   0    2.27    0.91
  -6  -2   0  512.71   20.11
  -6   2   0  481.28   20.09
  -6   2   0  491.91   20.08
  -6  -2   0  505.62   20.12
  -7  -2   0   31.94    2.44
  -7   2   0   32.49    2.26
  -7  -2   0   31.66    2.20
  -7   2   0   31.01    2.44
  -8  -2   0 2910.08  111.08
  -8   2   0 2744.65  111.03
  -8  -2   0 2912.10  111.07
  -8   2   0 2748.08  111.02
  -9   2   0  183.09    8.35
  -9  -2   0  190.78    8.40
 -10   2   0  574.04   24.11
 -10  -2   0  609.88   24.17
 -11   2   0  713.90   30.02
 -11  -2   0  769.56   30.11
 -12   2   0  910.87   37.90
 -12  -2   0  972.59   37.97
 -13   2   0   43.00    3.37
 -13  -2   0   39.24    3.30
 -14  -2   0 3304.55  129.07
 -14   2   0 3244.25  129.05
 -15  -2   0  886.10   35.38
 -15   2   0  850.68   35.33
 -16  -2   0   60.24    4.23
 -16   2   0   61.27    4.19
 -17   2   0  891.08   36.66
 -17  -2   0  904.03   36.68
 -18   2   0  747.56   29.48
  18  -2   0  682.07   29.14
  18   2   0  670.62   29.14
  18   2   0  735.44   29.51
 -18  -2   0  744.15   29.47
  18   2   0  693.34   29.05
  19   2   0   11.23    2.25
  19  -2   0   13.04    2.51
 -19  -2   0   11.82    2.66
 -19   2   0   13.45    2.66
  19   2   0    8.26    2.62
  19   2   0    8.68    2.25
 -20  -2   0 1190.69   47.49
 -20   2   0 1196.28   47.51
  20   2   0 1134.72   47.10
  20   2   0 1140.88   47.28
  20  -2   0 1148.49   47.28
  20   2   0 1222.66   47.64
  21   2   0  913.04   37.15
  21   2   0  878.74   36.91
  21  -2   0  922.87   36.97
  21  -2   0  902.56   37.14
  21   2   0  898.79   37.27
 -21   2   0  903.70   37.27
 -21  -2   0  926.14   37.29
  22   2   0   98.15    5.65
  22  -2   0   80.48    5.26
 -22   2   0   77.71    5.27
  22   2   0   83.42    5.30
  22   2   0   85.47    5.07
  22  -2   0   93.86    5.18
 -22  -2   0   78.09    5.24
  23  -2   0  418.53   18.38
  23   2   0  422.23   18.48
  23   2   0  422.56   18.35
  23  -2   0  429.90   18.13
  24  -2   0  105.74    5.71
  24   2   0  105.35    6.09
  24  -2   0  106.87    6.12
  25  -2   0   41.12    3.62
  25  -2   0   35.52    2.94
  25   2   0   31.79    3.38
  26  -2   0  187.81    8.58
  26   2   0  190.65    8.98
  26  -2   0  181.45    8.96
  27  -2   0  271.27   11.58
  27   2   0  270.86   11.53
  27   2   0  256.49   11.25
  27  -2   0  235.52   10.99
  28  -2   0   50.79    3.11
  28   2   0   60.50    3.73
  28   2   0   53.36    3.31
  28  -2   0   60.60    3.78
  29  -2   0   92.80    4.66
  29  -2   0   76.70    4.57
  29   2   0   91.68    4.62
  29   2   0   84.11    4.27
  30   2   0   14.97    1.40
  30  -2   0   17.41    1.94
  30   2   0   14.33    1.83
  30  -2   0   15.26    1.84
  31  -2   0    2.31    1.12
 -31  -2   0    0.52    1.12
 -31   2   0    2.40    1.19
   0  -3   0    1.94    1.05
   1  -3   0   83.98    3.62
  -1  -3   0   77.56    3.55
  -2   3   0 1087.83   42.45
  -2  -3   0 1074.58   42.64
  -2  -3   0 1086.25   42.46
  -3   3   0    7.04    0.94
  -3  -3   0    8.28    0.99
  -3  -3   0    9.12    1.09
  -4  -3   0  642.50   25.87
  -4  -3   0  672.38   25.87
  -4   3   0  643.89   25.88
  -5   3   0   79.05    3.97
  -5  -3   0   83.59    3.98
  -5  -3   0   88.49    3.82
  -6  -3   0 1143.62   44.75
  -6  -3   0 1146.65   44.94
  -6   3   0 1114.09   44.93
  -7  -3   0   38.73    2.55
  -7  -3   0   36.06    2.06
  -7   3   0   34.46    2.50
  -8  -3   0    9.33    1.91
  -8   3   0    9.40    1.92
  -9   3   0  266.11   11.54
  -9  -3   0  270.10   11.51
 -10   3   0 2358.17   94.05
 -10  -3   0 2411.37   94.06
 -11   3   0    3.77    2.45
 -11  -3   0    4.03    2.40
 -12   3   0 2253.31   90.92
 -12  -3   0 2346.81   90.94
 -13  -3   0 1224.26   48.11
 -13   3   0 1173.18   48.05
 -14  -3   0   43.55    3.58
 -14   3   0   44.24    3.56
 -15  -3   0  515.93   21.21
 -15   3   0  490.59   21.15
 -16  -3   0 1162.27   45.83
 -16   3   0 1104.99   45.74
 -17   3   0  475.05   20.42
 -17  -3   0  485.54   20.45
 -18   3   0  577.53   23.43
 -18  -3   0  587.29   23.45
  18   3   0  530.77   23.18
  18  -3   0  553.59   23.05
  18   3   0  601.00   23.70
  18  -3   0  524.56   23.13
  18   3   0  526.62   22.96
  19   3   0 1000.85   40.70
  19   3   0  963.84   40.11
 -19   3   0 1006.99   40.52
 -19  -3   0 1027.85   40.57
  19   3   0  979.24   40.35
  19  -3   0  968.76   40.32
  19  -3   0 1003.97   40.20
  20   3   0   56.13    3.91
  20   3   0   56.43    4.27
  20  -3   0   63.98    4.01
  20   3   0   51.14    4.63
  20  -3   0   60.70    4.33
 -20   3   0   57.09    4.29
 -20  -3   0   61.71    4.30
  21   3   0  114.73    6.42
  21   3   0  110.63    6.11
  21   3   0  126.01    6.92
 -21   3   0  111.40    6.49
  21  -3   0  114.92    6.10
 -21  -3   0  112.57    6.47
  21  -3   0  113.32    6.44
  22  -3   0  486.41   21.00
  22  -3   0  506.86   20.73
  22   3   0  483.04   20.97
 -22  -3   0  481.20   21.07
  22   3   0  492.82   20.75
  22   3   0  504.20   21.28
 -22   3   0  484.56   21.10
  23   3   0  234.51   11.49
  23   3   0  242.00   11.28
  23  -3   0  243.99   11.35
  23  -3   0  242.24   10.90
  24  -3   0  134.41    6.53
  24   3   0  125.23    6.87
  24  -3   0  128.62    6.98
  25  -3   0  362.24   16.06
  25  -3   0  391.71   16.56
  25   3   0  392.49   16.52
  26  -3   0    0.81    2.25
  26   3   0    1.35    2.16
  26  -3   0    1.49    1.53
  27  -3   0    3.24    2.15
  27  -3   0    6.24    1.51
  27   3   0    2.33    2.01
  28  -3   0   61.87    3.88
  28   3   0   68.74    3.91
  28   3   0   62.62    3.65
  29  -3   0   82.23    4.18
  29   3   0   72.01    3.86
  29   3   0   76.61    4.08
  29  -3   0   72.60    4.18
  30   3   0   58.44    2.98
 -30  -3   0   58.56    3.28
  30  -3   0   62.23    3.34
 -30   3   0   55.24    3.23
 -31   3   0   10.56    1.26
 -31  -3   0   11.36    1.26
  31  -3   0   14.48    1.36
   0  -4   0 1800.98   70.68
  -1  -4   0  285.11   11.87
   1  -4   0  299.63   11.91
  -2   4   0  790.42   31.14
  -2  -4   0  801.02   31.15
  -2  -4   0  803.22   31.51
  -3   4   0   51.11    2.23
  -3  -4   0   51.13    2.61
  -3  -4   0   48.64    2.24
  -4  -4   0    9.66    1.30
  -4   4   0   11.62    1.08
  -4  -4   0   11.21    1.08
   4  -4   0    8.86    1.43
  -5  -4   0    8.40    1.24
  -5  -4   0    9.61    1.26
  -5   4   0    9.46    1.19
  -6  -4   0  245.93    9.71
  -6   4   0  229.76    9.73
  -6  -4   0  224.06    9.71
  -7  -4   0  411.52   16.68
  -7  -4   0  407.17   16.56
  -7   4   0  405.96   16.71
  -8  -4   0  372.81   15.62
  -8  -4   0  398.49   15.42
  -8   4   0  357.56   15.61
  -9  -4   0  333.18   13.63
  -9   4   0  311.01   13.60
 -10  -4   0  171.94    7.81
 -10   4   0  162.46    7.82
 -11  -4   0    9.72    2.32
 -11   4   0   10.74    2.37
 -12  -4   0  123.60    6.20
 -12   4   0  113.90    6.12
 -13  -4   0   89.82    4.87
  13  -4   0   75.19    3.93
 -13   4   0   82.28    4.81
 -14   4   0  334.71   14.36
  14  -4   0  316.51   13.56
 -14  -4   0  351.57   14.43
 -15  -4   0  353.29   15.08
 -15   4   0  336.80   15.02
 -16  -4   0   41.62    3.45
 -16   4   0   36.31    3.38
 -17  -4   0   28.59    3.24
 -17   4   0   24.66    2.90
 -17  -4   0   28.48    3.05
  17  -4   0   23.99    2.74
  18  -4   0    5.30    2.31
 -18   4   0    3.54    2.13
  18   4   0    2.12    2.15
  18  -4   0    5.20    1.85
 -18  -4   0    4.76    2.34
  18   4   0    3.49    1.82
 -18  -4   0    2.73    2.08
  19   4   0  111.12    6.06
 -19  -4   0  128.81    6.61
  19  -4   0  114.96    6.37
 -19   4   0  117.13    6.44
  19   4   0  118.98    6.42
  19  -4   0  112.19    6.01
  19   4   0  109.89    6.77
  20   4   0  286.90   12.95
 -20  -4   0  304.12   13.41
  20   4   0  299.45   13.28
  20   4   0  312.60   13.81
 -20   4   0  283.67   13.32
  20  -4   0  288.56   12.94
  20  -4   0  289.23   13.22
  21   4   0   66.53    5.01
 -21  -4   0   69.99    4.71
 -21   4   0   62.94    4.66
  21   4   0   69.82    4.29
  21  -4   0   65.91    4.63
  21  -4   0   65.59    4.19
  21   4   0   70.25    4.70
  22  -4   0  253.76   11.55
  22   4   0  266.24   11.97
  22   4   0  277.60   12.48
  22   4   0  250.99   11.61
 -22   4   0  253.46   12.00
  22  -4   0  257.98   11.94
 -22  -4   0  263.83   12.08
  23  -4   0   85.13    4.90
  23  -4   0   91.46    5.46
  23   4   0   90.74    5.38
  24  -4   0    0.40    1.59
  24   4   0    1.48    2.29
  24  -4   0    0.13    2.32
  25  -4   0    1.91    2.24
  25   4   0    1.16    2.21
  25  -4   0    0.81    1.51
  26  -4   0  100.71    5.37
  26  -4   0   90.00    4.78
  26   4   0   99.06    5.33
  27  -4   0   24.54    2.62
  27   4   0   24.45    2.52
  27  -4   0   18.46    2.14
  28  -4   0  118.03    6.10
  28   4   0  129.57    6.07
  28   4   0  133.79    6.17
  29   4   0   71.17    3.80
  29   4   0   71.93    3.74
  29  -4   0   74.33    3.88
  30   4   0    1.09    0.95
 -30   4   0   -2.05    1.47
 -30  -4   0   -0.69    1.14
  30  -4   0    1.19    1.39
 -30   4   0    1.05    1.11
 -31   4   0   30.14    1.90
  31  -4   0   28.92    1.80
   0  -5   0    4.14    1.33
  -1  -5   0  198.22    8.39
   1  -5   0  198.39    8.44
  -2  -5   0 1180.27   46.61
  -3  -5   0  533.04   20.93
  -3   5   0  534.45   20.91
  -3  -5   0  523.83   21.40
  -4   5   0 1099.39   44.17
  -4  -5   0 1141.06   44.20
   4  -5   0 1184.65   44.70
  -4  -5   0 1116.23   44.56
   5  -5   0  233.33   10.09
  -5   5   0  232.89    9.65
  -5  -5   0  239.71    9.68
  -5  -5   0  245.16    9.99
  -6   5   0  882.28   34.76
  -6  -5   0  880.22   34.77
  -6  -5   0  860.10   34.94
   6  -5   0  889.65   35.08
  -7  -5   0   84.24    4.11
  -7   5   0   90.14    4.07
  -7  -5   0   81.53    4.03
   7  -5   0   74.95    4.23
   8  -5   0 1034.70   41.74
  -8  -5   0 1028.45   41.65
  -8   5   0 1012.99   41.66
  -8  -5   0 1117.76   41.67
   9  -5   0  937.29   39.30
  -9  -5   0 1002.93   39.37
  -9   5   0  965.73   39.35
  -9  -5   0 1033.58   39.25
 -10  -5   0    1.47    1.99
 -10   5   0    2.76    2.04
  10  -5   0    2.82    1.49
 -11   5   0  374.80   16.02
 -11  -5   0  397.63   16.07
  11  -5   0  370.29   15.72
 -12  -5   0  177.70    8.00
  12  -5   0  163.58    7.47
 -12   5   0  165.85    7.96
 -13  -5   0  111.84    5.62
  13  -5   0  101.98    5.02
 -13   5   0  101.54    5.56
 -14   5   0    4.77    1.99
  14  -5   0    3.26    1.23
 -14  -5   0    5.78    2.06
 -15   5   0  567.33   24.36
 -15  -5   0  606.11   24.47
  16   5   0  150.38    8.18
 -16  -5   0  143.02    8.07
 -16   5   0  153.84    7.80
  17  -5   0    8.67    2.32
  17   5   0    8.13    2.23
 -17  -5   0   14.81    2.96
 -17  -5   0   10.75    2.39
  17   5   0   12.40    3.21
 -17   5   0    9.17    2.34
  17   5   0   11.09    2.09
  18   5   0    4.18    2.94
 -18  -5   0    6.77    2.81
  18   5   0    3.97    2.26
 -18   5   0    3.48    2.13
 -18  -5   0    6.12    2.25
  18  -5   0    4.80    2.25
  18  -5   0    5.44    1.86
  18   5   0    4.88    1.90
 -19   5   0  191.50    9.26
  19  -5   0  194.00    8.96
 -19  -5   0  199.29    9.38
  19  -5   0  184.67    9.16
 -19  -5   0  195.87    9.73
  19   5   0  178.84    8.87
  19   5   0  196.05    9.28
  20  -5   0  228.20   10.79
  20   5   0  244.32   10.89
  20  -5   0  223.33   10.43
 -20   5   0  218.92   10.73
 -20  -5   0  250.13   10.96
  20   5   0  223.45   10.46
 -21  -5   0    1.99    2.04
 -21   5   0    2.80    2.08
  21   5   0    1.68    2.35
  21  -5   0    2.08    2.36
  21   5   0    5.40    1.98
  21  -5   0    5.46    1.83
  22   5   0    8.30    1.99
  22  -5   0    6.18    2.46
  22  -5   0    6.64    1.86
  22   5   0   11.56    2.56
  23  -5   0  100.73    5.31
  23   5   0   97.95    5.37
  23  -5   0  104.04    5.81
  23   5   0  106.49    5.81
  24  -5   0   88.06    5.09
  24  -5   0   85.07    4.61
  24   5   0   82.75    5.00
  25   5   0    4.86    2.06
  25  -5   0    1.54    2.03
  26   5   0   85.68    4.74
  26  -5   0   92.16    4.88
  26  -5   0   79.40    4.71
  27   5   0   91.74    4.58
  27  -5   0   97.07    4.70
  28   5   0    8.62    1.63
  28  -5   0    6.37    1.67
 -29  -5   0   52.71    2.98
 -29   5   0   58.48    3.36
  29   5   0   58.46    3.02
 -30   5   0   29.50    2.17
  30   5   0   30.98    1.87
   0  -6   0  768.16   30.75
  -1  -6   0  803.87   32.21
   1  -6   0  807.74   32.25
  -2  -6   0  133.53    6.06
  -3  -6   0  141.36    6.36
   4  -6   0  562.80   21.48
  -4   6   0  519.66   20.63
  -4  -6   0  526.46   20.65
  -4  -6   0  517.09   21.27
   5  -6   0  571.88   22.85
  -5   6   0  554.37   22.12
  -5  -6   0  548.59   22.65
  -5  -6   0  567.29   22.15
  -6  -6   0  398.90   15.46
  -6  -6   0  381.39   15.01
   6  -6   0  385.00   15.62
  -6   6   0  351.96   14.95
  -7  -6   0 1312.04   49.52
   7  -6   0 1229.64   49.63
  -7  -6   0 1259.09   49.19
  -7   6   0 1207.18   49.14
  -8  -6   0  190.97    8.28
   8  -6   0  180.18    8.39
  -8   6   0  186.74    8.03
  -8  -6   0  188.89    8.05
  -9  -6   0   54.54    3.08
  -9   6   0   41.31    2.87
  -9  -6   0   45.84    2.93
   9  -6   0   49.49    3.15
 -10  -6   0   94.01    4.77
  10  -6   0  105.98    4.97
 -10  -6   0   97.59    4.86
 -10   6   0   87.68    4.80
 -11  -6   0  622.31   24.04
  11  -6   0  576.47   23.94
 -11   6   0  564.56   23.95
  12  -6   0   15.31    1.81
 -12   6   0   11.64    2.11
 -12  -6   0   12.09    2.04
 -13   6   0  504.89   22.10
 -13  -6   0  566.31   22.23
  13  -6   0  534.00   21.89
 -14   6   0   10.68    2.09
  14  -6   0    9.82    1.56
 -14  -6   0   10.02    2.01
 -15   6   0   10.21    2.07
 -15  -6   0    8.35    2.85
 -15  -6   0    8.86    2.11
  15   6   0    7.81    2.92
 -16   6   0    3.45    1.87
 -16  -6   0    6.09    2.10
 -16  -6   0    1.57    2.54
  16   6   0    3.32    2.53
  17  -6   0  177.10    8.47
  17  -6   0  178.34    8.62
  17   6   0  175.24    9.44
 -17   6   0  178.25    8.65
 -17  -6   0  173.88    9.25
 -17  -6   0  195.62    8.81
 -18   6   0   76.94    4.84
 -18  -6   0   89.51    5.00
  18  -6   0   78.67    4.91
  18   6   0   76.78    5.55
 -18  -6   0   82.81    5.56
  18  -6   0   77.69    4.64
  19  -6   0    9.73    2.39
  19  -6   0    7.48    1.98
  19   6   0   10.72    3.35
  19   6   0   10.36    2.45
 -19  -6   0    9.94    2.34
 -19  -6   0    8.40    2.93
 -19   6   0    7.93    2.25
  20   6   0    0.70    2.99
 -20  -6   0    2.57    2.15
  20  -6   0    1.31    1.68
  20  -6   0    0.74    2.12
  20   6   0    2.35    2.17
  21  -6   0    0.16    2.67
 -21  -6   0    2.97    1.99
  21  -6   0    3.33    2.19
  21  -6   0    0.63    1.67
  21   6   0    3.17    2.15
  22  -6   0  109.80    6.03
  22  -6   0  101.29    6.45
  22   6   0  119.75    6.06
  23  -6   0    1.38    2.69
  23   6   0    4.23    2.13
  23  -6   0    3.22    2.06
  24   6   0   99.61    5.27
  24  -6   0   97.08    5.32
  24  -6   0   89.85    5.73
  25   6   0    2.58    1.81
  25  -6   0    1.62    2.10
  25  -6   0   -0.39    1.89
  26  -6   0    0.09    1.67
  26   6   0    0.08    1.60
  26  -6   0    2.51    1.83
  27  -6   0    7.29    1.64
  27  -6   0    6.02    1.66
  27   6   0    6.98    1.54
 -28  -6   0   62.79    3.17
  28  -6   0   47.56    2.87
 -28   6   0   69.59    3.66
 -28   6   0   53.68    3.02
  29   6   0   13.27    1.50
 -29   6   0   16.02    1.83
  30   6   0   59.35    2.86
 -30   6   0   60.81    3.04
   0  -7   0    3.24    1.77
   1  -7   0  140.42    6.81
  -1  -7   0  141.54    6.58
  -2  -7   0 1234.96   49.08
  -3  -7   0  255.48   10.98
  -4  -7   0  166.16    7.79
   4  -7   0  185.20    8.14
   5  -7   0    7.30    2.21
  -5  -7   0   11.95    1.91
  -5  -7   0   10.18    0.67
   6  -7   0  911.08   38.03
  -6  -7   0  957.23   37.19
  -6  -7   0  937.54   37.88
  -7  -7   0  278.22   12.08
   7  -7   0  277.73   12.33
  -7  -7   0  287.54   11.52
  -8  -7   0  977.30   37.99
  -8  -7   0  958.13   37.50
   8  -7   0  890.18   38.08
  -9  -7   0  129.99    6.04
  -9  -7   0  144.65    6.53
   9  -7   0  138.13    6.63
  10  -7   0    0.19    1.59
 -10  -7   0    2.05    1.55
 -10  -7   0    3.93    1.28
  11  -7   0   39.44    2.86
 -11  -7   0   35.30    2.60
  12  -7   0  516.38   21.79
 -12  -7   0  537.02   21.70
  13  -7   0   14.01    1.86
 -13  -7   0   12.55    1.89
  14   7   0  303.55   13.10
  14  -7   0  262.26   12.90
  14  -7   0  264.03   12.01
 -14  -7   0  290.78   12.24
 -15  -7   0  103.15    5.30
  15   7   0   94.55    6.06
  15  -7   0   86.28    5.91
  16   7   0    5.86    3.11
  16  -7   0    0.51    2.89
 -16  -7   0    2.99    1.78
  17   7   0  144.24    7.85
 -17  -7   0  137.64    7.61
 -17  -7   0  132.60    6.75
  18   7   0   38.90    4.09
 -18  -7   0   28.28    4.01
  18  -7   0   31.82    3.82
 -18  -7   0   33.92    3.02
  18  -7   0   30.96    3.07
  19  -7   0  166.05    9.19
 -19  -7   0  185.19    9.35
  19   7   0  194.23    9.56
  19  -7   0  165.30    8.38
  20  -7   0   35.10    4.01
 -20  -7   0   41.08    4.11
  20  -7   0   41.63    3.34
  21  -7   0   55.46    3.86
  21  -7   0   56.65    4.64
  22  -7   0   34.50    3.10
  22  -7   0   40.15    3.93
  23  -7   0  532.65   23.07
  23  -7   0  542.61   23.03
  23  -7   0  544.21   22.43
  24  -7   0    0.97    2.52
  24  -7   0    1.04    2.37
  24  -7   0    1.02    1.73
  25  -7   0   23.28    2.70
  25  -7   0   17.22    2.80
  25  -7   0   14.89    2.06
 -26  -7   0   17.58    1.94
  26  -7   0   17.34    2.29
  26  -7   0   23.18    2.81
 -27  -7   0  101.14    4.87
  27  -7   0  101.73    5.05
 -28   7   0   59.93    3.09
  28  -7   0   40.08    2.39
  29   7   0  129.97    5.12
 -29   7   0   97.02    5.04
   0  -8   0 4009.35  157.51
  -1  -8   0  179.65    8.25
   1  -8   0  176.70    8.30
  -2  -8   0  441.31   18.39
  -3  -8   0   11.87    2.18
  -4  -8   0 2229.29   87.99
   4  -8   0 2226.34   88.22
  -5  -8   0  276.13   12.24
   5  -8   0  294.28   12.60
  -6  -8   0 1315.22   52.31
   6  -8   0 1307.83   52.56
   7  -8   0   57.36    3.73
  -7  -8   0   47.79    3.29
   8  -8   0  147.19    7.55
  -8  -8   0  165.06    7.42
  -9  -8   0    4.47    1.71
   9  -8   0    3.80    1.91
 -10  -8   0  883.63   34.37
  10  -8   0  808.42   34.45
  11  -8   0   24.99    2.53
  12  -8   0  146.89    7.21
  13  -8   0  146.23    7.77
 -13  -8   0  144.30    7.86
  13   8   0  135.69    7.63
  13  -8   0  147.70    7.10
  14   8   0  113.24    6.70
 -14  -8   0  109.72    6.69
  14  -8   0  118.73    6.84
  14  -8   0  112.88    5.82
  15   8   0  298.59   13.61
  15  -8   0  277.61   13.56
  16  -8   0   72.01    5.46
  16   8   0   83.28    5.62
  17  -8   0   66.80    5.26
  18  -8   0    6.87    3.26
 -19  -8   0  217.11   10.72
  19  -8   0  208.98   10.77
 -20  -8   0    8.85    2.95
  20  -8   0   12.53    3.30
  20  -8   0   11.56    3.36
  21  -8   0  573.62   24.02
  21  -8   0  542.10   23.94
  22  -8   0   17.92    3.20
  22  -8   0   13.99    3.06
  23  -8   0   35.19    3.78
  23  -8   0   36.35    3.63
  24  -8   0   52.83    4.03
  24  -8   0   45.10    3.76
 -25   8   0  341.32   15.51
  25  -8   0  392.51   15.89
  25  -8   0  365.57   15.61
  26  -8   0    9.30    2.30
  26  -8   0   11.56    1.94
 -26   8   0    8.47    1.93
 -27   8   0   51.45    3.21
  27  -8   0   52.25    3.08
 -28   8   0    4.24    1.24
  29   8   0   63.57    3.00
   0  -9   0    4.49    2.08
  -1  -9   0   27.53    2.98
   1  -9   0   34.34    3.08
  -2  -9   0  606.56   25.02
  -3  -9   0  147.78    7.21
  -4  -9   0  315.38   13.79
   4  -9   0  324.35   14.13
  -5  -9   0   25.17    2.52
   5  -9   0   29.48    3.09
  -6  -9   0   42.25    3.05
   6  -9   0   37.18    3.45
   7  -9   0  132.38    6.76
  -7  -9   0  122.58    6.32
  -8  -9   0  307.39   12.89
   8  -9   0  276.61   13.09
  -9  -9   0  130.42    6.51
   9  -9   0  128.48    6.74
  10  -9   0  307.87   14.01
 -10  -9   0  323.40   13.84
  11  -9   0  309.68   13.33
  11  -9   0  278.36   12.89
 -11  -9   0  290.57   12.73
 -11  -9   0  277.91   13.17
  11  -9   0  282.33   13.46
  12  -9   0    4.45    2.64
 -12  -9   0    3.31    2.72
  12  -9   0    4.21    1.85
  13  -9   0    3.39    2.66
  13  -9   0    4.24    1.82
 -13  -9   0    2.65    2.85
  14  -9   0  229.49   10.84
  14  -9   0  254.27   11.87
 -14  -9   0  240.15   11.69
 -15  -9   0  604.72   26.01
  15  -9   0  600.55   26.11
  15  -9   0  611.82   26.36
  16  -9   0  274.86   13.31
 -16  -9   0  257.85   12.85
  16  -9   0  272.97   13.09
  17  -9   0   88.90    6.23
  17  -9   0   95.42    6.58
  18  -9   0   16.22    3.65
  18  -9   0   14.94    3.46
  19  -9   0    6.95    3.18
  19  -9   0   12.02    3.47
  20  -9   0  148.44    8.65
  20  -9   0  174.96    8.91
  21  -9   0  251.96   12.38
  21  -9   0  268.52   12.45
  22  -9   0  183.37    8.90
  22  -9   0  176.84    8.84
 -22   9   0  157.38    8.34
  23  -9   0   98.64    5.94
 -23   9   0   93.36    5.52
  23  -9   0  111.94    5.98
 -24   9   0    5.17    2.00
  24  -9   0    6.70    2.37
  24  -9   0    5.51    2.43
  25  -9   0   26.67    2.76
 -25   9   0   20.86    2.26
  25  -9   0   20.18    2.46
  26  -9   0   13.47    1.88
 -26   9   0   12.95    1.73
  26  -9   0   15.67    2.11
  27  -9   0   33.45    2.14
 -27   9   0   34.40    2.18
  28  -9   0   64.06    3.25
   0 -10   0    2.55    2.16
   1 -10   0   87.66    5.31
  -1 -10   0   86.42    5.20
  -2 -10   0   98.15    5.51
  -3 -10   0   18.90    2.46
   4 -10   0  286.59   12.80
  -4 -10   0  270.99   12.39
   5 -10   0  161.86    8.27
  -5 -10   0  158.87    7.80
   6 -10   0   43.39    3.66
  -6 -10   0   44.13    3.30
  -7 -10   0  498.63   21.16
   7 -10   0  507.73   21.60
   8 -10   0 1068.60   42.00
  -8 -10   0 1021.51   41.73
   8 -10   0 1019.31   42.22
   8 -10   0 1008.73   42.09
   9 -10   0    3.00    2.28
  -9 -10   0    2.83    2.21
   9 -10   0   -1.06    2.08
  -9 -10   0    1.24    1.83
   9 -10   0    3.77    2.49
 -10 -10   0  179.51    8.66
 -10 -10   0  176.22    9.01
  10 -10   0  179.41    9.34
  10 -10   0  186.65    9.16
  10 -10   0  174.26    8.91
 -11 -10   0  488.12   20.62
 -11 -10   0  449.94   20.96
  11 -10   0  496.95   20.91
  11 -10   0  506.17   21.23
  11 -10   0  492.32   21.54
  12 -10   0  589.86   24.92
  12 -10   0  568.29   24.43
 -12 -10   0  562.24   24.78
  12 -10   0  605.85   25.35
  13 -10   0  474.47   20.77
 -13 -10   0  467.02   21.27
  13 -10   0  531.07   21.66
  14 -10   0  823.80   33.97
  14 -10   0  802.03   33.11
 -14 -10   0  794.20   33.74
  15 -10   0   76.12    5.90
 -15 -10   0   75.97    5.60
  16 -10   0    1.68    3.80
  16 -10   0    1.19    3.12
 -16 -10   0    0.18    2.81
  17 -10   0  524.47   23.08
 -17 -10   0  532.04   22.72
  17 -10   0  504.12   22.92
  18 -10   0  544.24   23.55
 -18  10   0  499.98   22.88
  18 -10   0  566.20   23.74
 -18 -10   0  557.76   23.37
  19 -10   0   23.05    3.86
  19 -10   0   27.78    4.10
 -19  10   0   25.04    3.36
  20 -10   0  310.17   13.40
  20 -10   0  284.87   13.22
 -21  10   0  250.37   11.82
  21 -10   0  261.25   12.36
  21 -10   0  282.33   12.53
  22 -10   0    8.44    2.62
 -22  10   0   10.78    2.27
  22 -10   0   10.07    2.82
  23 -10   0  183.26    8.26
  23 -10   0  168.07    8.09
  24 -10   0  168.90    7.75
  24 -10   0  178.86    7.88
  25 -10   0   12.58    1.89
 -25  10   0   12.96    1.50
  25 -10   0   14.75    2.15
  26 -10   0   42.91    2.67
  26 -10   0   48.58    2.93
  27 -10   0   32.77    2.16
   0 -11   0    1.94    2.37
  -1 -11   0  128.69    7.29
   1 -11   0  144.12    7.42
  -2 -11   0   34.07    3.37
  -3 -11   0   68.21    4.75
  -3 -11   0   75.20    5.12
  -3 -11   0   74.88    4.53
   3 -11   0   76.65    4.67
   4 -11   0  116.27    6.64
   4 -11   0  128.24    7.02
   4 -11   0  134.17    6.62
   4 -11   0  131.88    7.43
  -4 -11   0  116.43    6.53
  -4 -11   0  111.85    6.75
  -4 -11   0  117.00    6.39
   5 -11   0   78.90    5.18
   5 -11   0   69.16    5.18
   5 -11   0   83.93    4.96
  -5 -11   0   81.56    4.80
  -5 -11   0   67.70    4.61
  -5 -11   0   68.93    4.97
   6 -11   0  455.41   19.96
  -6 -11   0  436.54   19.45
  -6 -11   0  428.47   19.64
   6 -11   0  494.71   19.70
  -6 -11   0  440.48   19.44
   6 -11   0  482.79   19.93
   7 -11   0   92.85    6.19
   7 -11   0  111.66    6.10
   7 -11   0  117.66    6.52
  -7 -11   0  109.22    5.90
  -7 -11   0   98.76    6.02
  -7 -11   0   94.68    5.98
   8 -11   0    5.66    2.56
   8 -11   0    5.95    3.00
  -8 -11   0    6.18    2.61
  -8 -11   0    7.29    2.23
   8 -11   0    8.12    2.71
  -8 -11   0    8.70    2.70
  -9 -11   0  490.43   21.74
  -9 -11   0  485.98   21.63
   9 -11   0  535.72   21.91
   9 -11   0  529.77   22.20
   9 -11   0  491.34   21.86
  -9 -11   0  500.83   21.44
  10 -11   0  666.15   26.89
 -10 -11   0  616.67   26.72
  10 -11   0  670.25   27.26
 -10 -11   0  611.07   26.32
 -10 -11   0  611.73   26.53
  10 -11   0  622.62   26.71
  11 -11   0    3.29    2.30
  11 -11   0    4.14    2.89
  11 -11   0    2.00    3.24
 -11 -11   0    7.48    2.99
  12 -11   0  348.72   15.73
  12 -11   0  338.59   16.11
 -12 -11   0  319.71   15.49
  12 -11   0  353.53   15.66
  12 -11   0  338.70   15.28
  13 -11   0  226.50   10.84
  13 -11   0  240.10   11.12
  13 -11   0  235.12   11.93
  13 -11   0  221.13   11.46
 -13 -11   0  213.90   11.27
  14 -11   0   87.27    6.32
  14 -11   0   94.21    5.72
 -14 -11   0   92.12    6.19
 -15 -11   0  284.17   13.40
  15 -11   0  274.71   13.62
  16 -11   0  657.00   27.96
 -16 -11   0  641.84   27.61
  17 -11   0   10.01    3.66
 -17 -11   0   17.59    3.33
 -18 -11   0  141.53    7.62
  18 -11   0  126.81    7.89
  18 -11   0  128.74    7.69
 -19 -11   0  323.92   14.14
  19 -11   0  315.63   14.46
  19 -11   0  282.59   14.16
  20 -11   0  102.69    6.21
  20 -11   0  100.26    6.28
  21 -11   0   53.16    4.20
  21 -11   0   50.64    4.24
  22 -11   0  296.07   13.28
  22 -11   0  299.89   13.33
  23 -11   0   51.82    3.73
  23 -11   0   57.77    3.81
  24 -11   0   70.48    3.99
  24 -11   0   67.28    3.98
  25 -11   0   34.93    2.53
  25 -11   0   35.52    2.42
  26 -11   0   24.82    1.88
   0 -12   0 1134.29   46.95
   0 -12   0 1176.50   47.39
   0 -12   0 1182.46   47.63
   0 -12   0 1147.47   46.87
  -1 -12   0    6.79    2.41
   1 -12   0   15.51    3.70
  -1 -12   0   12.00    3.39
   1 -12   0    6.54    2.66
   1 -12   0   12.61    3.12
  -1 -12   0    9.66    2.60
   1 -12   0    7.48    2.42
  -1 -12   0   10.30    2.29
  -1 -12   0    9.53    2.88
   2 -12   0  282.44   12.42
  -2 -12   0  264.39   12.58
  -2 -12   0  252.78   12.24
  -2 -12   0  272.80   12.29
   2 -12   0  285.95   12.60
  -2 -12   0  258.00   12.89
  -2 -12   0  264.73   12.12
  -3 -12   0   33.66    4.02
  -3 -12   0   32.98    3.18
   3 -12   0   30.75    3.75
  -3 -12   0   33.59    3.60
  -3 -12   0   38.45    3.48
   3 -12   0   38.92    3.58
  -4 -12   0  179.16    9.05
   4 -12   0  167.68    9.39
   4 -12   0  161.41    8.56
  -4 -12   0  170.30    8.45
   4 -12   0  155.36    8.73
   4 -12   0  172.89    9.06
  -4 -12   0  175.45    8.70
  -4 -12   0  177.31    8.56
   5 -12   0    4.74    2.61
  -5 -12   0    7.75    2.57
  -5 -12   0   12.06    3.14
   5 -12   0   11.44    2.97
   5 -12   0    4.88    3.50
  -5 -12   0    8.57    2.55
   5 -12   0    9.76    2.85
   6 -12   0  764.65   31.76
   6 -12   0  777.21   32.34
   6 -12   0  780.53   31.54
  -6 -12   0  756.43   31.46
  -6 -12   0  726.76   31.35
   6 -12   0  751.40   31.94
  -6 -12   0  741.75   31.68
   7 -12   0    8.16    3.62
   7 -12   0   14.95    3.37
  -7 -12   0    8.80    2.79
  -7 -12   0    6.94    2.85
   7 -12   0   10.49    2.68
  -7 -12   0   12.13    2.59
   7 -12   0    6.78    3.01
  -8 -12   0  114.49    6.76
  -8 -12   0  117.34    7.11
  -8 -12   0  129.56    7.15
   8 -12   0  128.90    7.85
   8 -12   0  119.22    7.32
   8 -12   0  129.30    7.48
   8 -12   0  141.04    7.33
   9 -12   0   72.97    5.20
  -9 -12   0   68.36    5.05
   9 -12   0   64.46    4.94
   9 -12   0   70.99    5.65
  -9 -12   0   61.49    4.98
   9 -12   0   64.27    5.25
  -9 -12   0   67.96    4.61
  10 -12   0  120.61    7.10
 -10 -12   0  122.68    6.57
  10 -12   0  112.25    7.19
  10 -12   0  115.87    6.83
  10 -12   0  122.87    7.43
 -10 -12   0  109.19    6.93
 -10 -12   0  110.49    6.77
  11 -12   0   26.11    3.75
 -11 -12   0   23.48    3.29
  11 -12   0   21.01    3.03
  11 -12   0   19.13    3.88
  11 -12   0   23.99    3.76
 -11 -12   0   23.92    3.62
  12 -12   0   88.63    5.80
  12 -12   0  109.45    7.26
 -12 -12   0   96.46    6.35
  12 -12   0  100.68    6.32
  12 -12   0  100.02    6.48
  13 -12   0   24.45    4.55
 -13 -12   0   27.63    3.89
  13 -12   0   25.59    3.89
  13 -12   0   34.57    3.71
 -14 -12   0   57.42    4.89
  14 -12   0   60.50    4.56
  14 -12   0   64.19    5.59
  14 -12   0   55.03    5.12
  15 -12   0    0.58    3.29
 -15 -12   0    1.38    2.87
  15 -12   0    5.46    2.45
  16 -12   0   22.30    3.76
 -16 -12   0   21.85    3.43
 -17 -12   0    0.94    2.71
  17 -12   0    1.26    3.14
  18 -12   0   12.45    3.35
 -18 -12   0   13.75    2.89
  19 -12   0    0.48    2.92
  19 -12   0    6.43    2.98
 -19 -12   0    5.79    2.58
  20 -12   0  104.58    6.13
  20 -12   0  101.36    6.00
  21 -12   0    1.43    2.25
  21 -12   0    1.71    2.30
  22 -12   0   89.45    5.07
  22 -12   0   92.84    5.16
  23 -12   0   16.89    2.19
  23 -12   0   17.19    2.22
  24 -12   0   13.86    1.82
  24 -12   0   11.87    1.71
  25 -12   0   50.39    2.74
   0 -13   0    4.05    2.36
   0 -13   0    1.88    2.74
   0 -13   0    2.71    3.86
   0 -13   0   -1.35    2.91
   0 -13   0   -2.66    2.84
  -1 -13   0    8.74    2.64
   1 -13   0   15.88    3.30
   1 -13   0   16.18    3.11
   1 -13   0   17.30    3.84
  -1 -13   0   10.60    3.29
  -1 -13   0   14.31    2.94
  -1 -13   0   12.23    2.66
   1 -13   0   12.52    3.11
  -1 -13   0   12.00    3.09
  -2 -13   0 1444.94   58.90
  -2 -13   0 1435.56   59.39
  -2 -13   0 1453.61   59.70
  -2 -13   0 1456.00   59.05
   2 -13   0 1502.29   59.20
   2 -13   0 1496.48   59.34
  -3 -13   0  101.43    6.75
   3 -13   0   98.74    6.34
  -3 -13   0  100.34    6.12
  -3 -13   0  111.34    6.37
  -3 -13   0  105.68    6.07
   3 -13   0   99.81    6.40
   4 -13   0  778.97   33.89
   4 -13   0  819.86   33.49
  -4 -13   0  806.11   33.86
  -4 -13   0  793.16   33.28
   4 -13   0  806.38   34.30
   4 -13   0  825.83   33.68
  -4 -13   0  792.12   33.54
   5 -13   0   79.97    5.51
   5 -13   0   66.99    5.45
   5 -13   0   78.12    5.86
  -5 -13   0   80.81    5.28
  -5 -13   0   74.80    5.72
  -5 -13   0   81.97    5.37
   5 -13   0   76.90    6.38
   6 -13   0  172.06    9.52
  -6 -13   0  183.02    9.28
  -6 -13   0  176.43    9.55
   6 -13   0  182.03    9.36
   6 -13   0  174.49   10.10
   6 -13   0  176.27    9.70
  -6 -13   0  201.20    9.43
  -7 -13   0   21.12    3.44
   7 -13   0   17.31    3.33
  -7 -13   0   20.66    3.55
   7 -13   0   22.19    3.56
   7 -13   0   16.69    3.75
  -7 -13   0   24.28    3.04
   7 -13   0   21.93    4.18
   8 -13   0 1001.03   39.64
   8 -13   0  958.11   39.86
   8 -13   0  893.57   39.77
   8 -13   0  980.89   40.26
  -8 -13   0  946.40   39.34
  -8 -13   0  970.04   39.64
  -8 -13   0  945.21   39.51
  -9 -13   0  138.84    7.90
   9 -13   0  135.63    7.98
   9 -13   0  151.77    8.15
  -9 -13   0  144.10    7.60
   9 -13   0  132.59    8.28
   9 -13   0  136.19    8.43
  -9 -13   0  151.86    8.09
 -10 -13   0   47.46    4.30
  10 -13   0   41.42    4.22
  10 -13   0   45.80    4.77
  10 -13   0   49.94    4.93
  10 -13   0   49.88    4.51
 -10 -13   0   44.33    4.40
  11 -13   0  159.53    8.60
  11 -13   0  153.89    8.42
 -11 -13   0  144.93    7.93
 -11 -13   0  139.73    8.13
  11 -13   0  145.47    8.84
  12 -13   0  103.57    6.41
 -12 -13   0   95.94    6.34
  12 -13   0  102.53    7.10
  12 -13   0   85.21    6.23
  13 -13   0   19.91    3.17
  13 -13   0   20.10    4.19
 -13 -13   0   20.54    3.58
  13 -13   0   21.95    3.67
  14 -13   0   13.75    4.01
  14 -13   0   16.53    2.84
 -14 -13   0   19.86    3.39
  14 -13   0   24.78    3.75
  15 -13   0  105.88    6.60
  15 -13   0   89.55    6.75
  15 -13   0   99.51    5.68
 -15 -13   0  105.45    6.27
  16 -13   0    0.95    3.38
 -16 -13   0    5.82    2.77
  16 -13   0    3.82    2.86
 -17 -13   0    0.97    2.50
  17 -13   0   -1.14    2.81
  18 -13   0    2.07    2.64
 -18 -13   0    2.78    2.36
  19 -13   0   54.95    4.23
  20 -13   0   22.93    3.11
  20 -13   0   30.81    3.04
  21 -13   0    5.11    2.05
  21 -13   0    8.59    2.27
  22 -13   0    5.32    1.83
  22 -13   0    5.12    1.81
  23 -13   0   50.21    3.00
  23 -13   0   53.33    3.01
  24 -13   0   51.15    2.67
   0 -14   0  535.11   22.25
   0 -14   0  492.77   22.49
   0 -14   0  504.46   22.90
  -1 -14   0  176.87    9.41
  -1 -14   0  178.20    8.86
   1 -14   0  190.49    9.32
  -1 -14   0  170.09    9.09
   1 -14   0  178.28    9.51
   1 -14   0  162.46    9.16
  -1 -14   0  170.40    9.88
   1 -14   0  173.51    9.90
  -2 -14   0  105.47    6.94
   2 -14   0  113.59    6.96
   2 -14   0  115.30    7.81
   2 -14   0  119.20    6.97
  -2 -14   0  115.35    6.62
  -2 -14   0  118.64    6.84
  -2 -14   0  124.46    7.70
  -3 -14   0   62.93    4.85
   3 -14   0   74.22    5.47
   3 -14   0   67.37    5.21
  -3 -14   0   70.80    5.72
  -3 -14   0   66.72    5.06
  -4 -14   0  157.98    8.23
  -4 -14   0  140.03    8.25
   4 -14   0  164.81    8.48
   4 -14   0  141.88    8.62
  -4 -14   0  158.23    8.86
   4 -14   0  145.32    9.21
   4 -14   0  162.36    8.63
  -5 -14   0  155.15    8.37
   5 -14   0  156.54    9.44
   5 -14   0  154.62    8.43
  -5 -14   0  152.77    8.24
   5 -14   0  151.55    8.61
  -5 -14   0  163.57    8.93
   5 -14   0  134.11    8.67
  -6 -14   0  475.57   21.15
   6 -14   0  486.23   21.17
   6 -14   0  482.72   20.91
  -6 -14   0  476.88   20.77
   6 -14   0  451.37   21.64
  -7 -14   0  247.11   11.60
   7 -14   0  213.69   11.21
   7 -14   0  222.75   11.57
   7 -14   0  226.83   12.08
  -7 -14   0  227.79   11.19
   8 -14   0   54.33    5.23
  -8 -14   0   43.28    4.44
  -8 -14   0   42.69    4.29
   8 -14   0   45.56    4.82
   8 -14   0   43.61    4.39
   9 -14   0   33.17    4.59
  -9 -14   0   26.32    3.73
   9 -14   0   32.25    3.95
  -9 -14   0   28.82    3.81
   9 -14   0   25.73    4.06
  10 -14   0   37.16    4.49
 -10 -14   0   35.30    3.96
 -10 -14   0   31.95    3.79
  10 -14   0   33.31    4.23
  10 -14   0   35.56    4.23
 -11 -14   0   31.81    3.83
 -11 -14   0   35.06    3.59
  11 -14   0   30.82    4.46
  11 -14   0   29.18    3.98
  11 -14   0   32.73    4.09
 -12 -14   0  103.15    6.22
 -12 -14   0   88.68    5.64
  12 -14   0   98.38    6.42
  12 -14   0  101.67    6.95
  12 -14   0   99.34    6.19
 -13 -14   0  124.62    7.29
  13 -14   0  133.39    7.29
  13 -14   0  129.79    7.69
  13 -14   0  142.26    8.29
 -14 -14   0  108.37    6.39
  14 -14   0  117.65    7.35
  14 -14   0  108.37    6.80
  14 -14   0  108.67    6.14
 -15 -14   0   36.67    3.54
  15 -14   0   32.78    3.05
  15 -14   0   33.68    4.26
  15 -14   0   33.99    3.98
  16 -14   0    1.83    3.04
 -16 -14   0    5.67    2.41
  16 -14   0    2.14    2.80
 -17 -14   0   -1.95    2.28
  17 -14   0   -1.94    2.57
  17 -14   0    0.45    2.77
  18 -14   0   14.15    2.62
  19 -14   0    2.12    2.06
  20 -14   0   23.24    2.47
  21 -14   0   41.92    2.83
  21 -14   0   43.61    2.93
  22 -14   0   38.55    2.37
  22 -14   0   35.73    2.35
   0 -15   0    0.23    3.48
   0 -15   0    1.00    2.91
   1 -15   0   42.79    4.97
   1 -15   0   42.07    4.23
  -1 -15   0   40.76    4.08
  -1 -15   0   39.51    4.91
  -2 -15   0   74.74    6.00
  -2 -15   0   76.39    5.20
   2 -15   0   83.16    6.55
   2 -15   0   75.22    5.43
   3 -15   0  207.17   10.86
   3 -15   0  229.43   10.90
  -3 -15   0  219.25   11.37
  -3 -15   0  210.21   10.48
  -4 -15   0    6.56    3.44
   4 -15   0    7.42    3.16
   4 -15   0    8.31    3.29
  -4 -15   0   15.50    2.99
  -5 -15   0   45.49    4.12
   5 -15   0   36.15    5.07
   5 -15   0   47.20    4.66
  -5 -15   0   48.13    4.80
   5 -15   0   49.71    4.49
   6 -15   0  278.45   13.19
   6 -15   0  269.30   12.96
   6 -15   0  278.60   13.94
  -6 -15   0  263.97   12.71
  -6 -15   0  272.76   13.24
  -7 -15   0   48.39    4.41
   7 -15   0   56.38    5.47
   7 -15   0   53.16    4.71
   7 -15   0   52.19    5.04
  -7 -15   0   52.40    4.77
  -8 -15   0   96.08    6.41
  -8 -15   0  102.21    6.16
   8 -15   0  112.53    7.30
   8 -15   0   92.27    6.55
   8 -15   0   99.30    6.41
   9 -15   0   77.18    5.95
  -9 -15   0   74.93    5.26
   9 -15   0   70.69    5.81
  -9 -15   0   79.69    5.45
   9 -15   0   71.85    5.46
  10 -15   0  138.46    7.97
  10 -15   0  130.05    7.51
 -10 -15   0  125.78    7.13
 -10 -15   0  124.27    7.15
  10 -15   0  129.78    7.65
 -11 -15   0   36.57    3.56
  11 -15   0   40.08    4.12
  11 -15   0   34.67    4.09
  11 -15   0   39.72    4.78
 -11 -15   0   35.67    3.76
  12 -15   0  495.38   21.85
 -12 -15   0  498.08   21.16
  12 -15   0  488.77   21.55
  12 -15   0  527.23   21.46
 -12 -15   0  472.74   20.83
 -13 -15   0   29.67    3.21
  13 -15   0   30.38    4.11
  13 -15   0   31.98    3.19
  13 -15   0   25.66    3.69
  14 -15   0   10.15    3.31
 -14 -15   0   14.90    2.61
  14 -15   0   15.83    2.41
  14 -15   0   11.85    3.11
  15 -15   0   -0.56    2.66
 -15 -15   0    0.43    2.04
  15 -15   0   -2.93    3.02
 -16 -15   0  162.13    7.52
  16 -15   0  154.71    7.94
  16 -15   0  151.31    8.05
  17 -15   0  101.30    5.63
  17 -15   0  102.07    5.77
  18 -15   0   92.89    5.06
  19 -15   0  181.24    8.18
  20 -15   0    4.28    1.39
   0 -16   0  215.05   11.44
   1 -16   0  431.47   19.64
   1 -16   0  411.36   18.67
  -1 -16   0  433.47   19.41
   2 -16   0    2.77    2.93
  -2 -16   0    5.18    3.66
   2 -16   0    5.25    3.95
   3 -16   0    8.36    3.13
  -3 -16   0    5.83    3.48
   4 -16   0  275.24   12.41
  -4 -16   0  244.47   11.88
  -4 -16   0  259.10   12.75
  -5 -16   0  100.95    6.01
   5 -16   0   99.18    7.25
  -5 -16   0  100.62    6.70
   5 -16   0  106.51    6.43
   5 -16   0  103.23    6.55
  -6 -16   0   31.40    4.07
   6 -16   0   34.59    3.85
  -6 -16   0   30.03    3.37
   6 -16   0   27.46    3.98
   6 -16   0   29.33    4.61
   7 -16   0  224.44   11.42
   7 -16   0  238.64   11.34
   7 -16   0  245.76   12.13
  -7 -16   0  213.33   10.76
  -7 -16   0  242.71   11.45
  -8 -16   0  209.12   10.48
   8 -16   0  221.00   11.08
   8 -16   0  205.74   10.71
  -8 -16   0  199.03    9.96
   8 -16   0  223.27   10.57
   9 -16   0   94.24    6.09
   9 -16   0   93.01    6.38
   9 -16   0  103.52    6.49
  -9 -16   0   90.80    5.80
  -9 -16   0   96.95    5.64
  10 -16   0  312.27   15.00
  10 -16   0  324.36   14.80
 -10 -16   0  323.70   14.29
 -10 -16   0  318.91   14.46
  10 -16   0  347.85   15.02
  11 -16   0    0.15    2.69
 -11 -16   0    2.47    2.14
 -11 -16   0    1.96    2.10
  11 -16   0   -1.52    3.22
  11 -16   0   -0.15    2.44
 -12 -16   0    9.20    2.29
  12 -16   0    6.44    3.23
  12 -16   0    8.93    2.47
  12 -16   0    6.21    2.84
  13 -16   0  126.75    7.13
  13 -16   0  122.54    7.31
 -13 -16   0  141.69    6.58
  13 -16   0  131.18    6.58
 -14 -16   0  321.11   12.80
  14 -16   0  305.70   13.35
  14 -16   0  311.70   13.56
  15 -16   0  277.57   12.19
  15 -16   0  266.19   12.27
  16 -16   0   98.10    5.27
  16 -16   0   98.18    5.41
  17 -16   0   30.36    2.56
  17 -16   0   29.44    2.64
  18 -16   0    4.42    1.57
  18 -16   0    3.89    1.42
   0 -17   0    0.20    3.45
   1 -17   0   94.41    6.72
  -1 -17   0   97.40    6.68
   2 -17   0    3.11    3.59
  -2 -17   0    4.11    3.28
  -3 -17   0  256.53   12.48
   4 -17   0   11.14    2.89
  -4 -17   0   10.54    3.41
   5 -17   0  151.57    8.88
   5 -17   0  148.63    8.07
  -5 -17   0  166.97    8.49
   6 -17   0    1.00    2.66
  -6 -17   0    0.16    2.75
   6 -17   0    4.67    3.46
   7 -17   0    3.24    2.70
   7 -17   0    2.37    3.03
  -7 -17   0    2.62    2.72
   8 -17   0    4.42    2.71
   8 -17   0    5.16    2.97
  -8 -17   0    3.61    2.57
   9 -17   0  348.71   14.89
  -9 -17   0  325.18   14.37
   9 -17   0  311.02   14.54
  10 -17   0    3.46    2.45
 -10 -17   0    0.71    1.99
 -10 -17   0    0.75    1.51
  10 -17   0    1.81    2.57
  11 -17   0  265.69   11.54
 -11 -17   0  235.95   10.59
  11 -17   0  260.22   11.25
  12 -17   0   47.63    3.24
  12 -17   0   52.58    3.86
  13 -17   0    5.13    1.38
  13 -17   0    8.17    2.25
  14 -17   0   45.29    3.22
  15 -17   0  175.60    7.89
  16 -17   0    9.57    1.48
   0 -18   0  191.14    9.88
   1 -18   0  480.01   21.00
  -1 -18   0  477.23   20.87
   2 -18   0   26.93    4.00
  -2 -18   0   29.31    3.80
  -3 -18   0   14.25    3.01
  -4 -18   0  135.57    7.28
  -5 -18   0  248.03   11.48
   5 -18   0  247.65   11.95
  -6 -18   0   80.03    5.07
   6 -18   0   87.61    5.58
  -7 -18   0  609.83   26.02
   7 -18   0  660.83   26.52
   8 -18   0   33.80    3.28
  -8 -18   0   29.69    2.84
   9 -18   0   53.63    3.78
   9 -18   0   61.55    3.86
  -9 -18   0   53.33    3.39
  10 -18   0   12.76    2.28
  10 -18   0   16.34    1.99
  11 -18   0  196.59    8.87
  11 -18   0  230.00    9.40
  12 -18   0   11.96    1.84
   0 -19   0    3.55    2.56
   1 -19   0  111.22    6.33
  -1 -19   0  113.51    6.30
   2 -19   0   56.89    4.38
  -2 -19   0   53.95    4.08
  -3 -19   0  376.46   16.16
  -4 -19   0   16.81    2.47
   5 -19   0  134.35    6.56
  -5 -19   0  115.64    6.06
   6 -19   0    1.98    1.97
  -6 -19   0    2.69    1.61
   7 -19   0   40.85    2.97
  -7 -19   0   40.08    2.55
   8 -19   0    2.63    1.31
 -32   0   1    0.55    0.98
  32   0  -1    1.05    0.91
  31   0  -1    1.86    0.81
  31   0  -1    1.83    1.32
 -31   0   1    2.72    1.48
  30   0  -1    0.71    1.12
  30   0  -1   -1.38    1.67
  29   0  -1    0.21    1.42
  29   0  -1   -2.20    1.97
  28   0  -1    4.53    2.30
  28   0  -1    1.13    1.59
  27   0  -1    0.80    1.78
  27   0  -1   -0.47    2.36
  26   0  -1   -1.51    2.33
  26   0  -1   -0.45    1.89
  25   0  -1    1.59    2.37
  25   0  -1    0.86    1.97
  24   0  -1    1.36    2.41
 -23   0   1    0.75    2.22
  23   0  -1    0.14    2.52
 -22   0   1    3.28    2.42
  22   0  -1   -0.52    2.30
  22   0  -1    1.76    2.25
 -21   0   1   -0.44    2.41
  21   0  -1    1.85    2.24
  21   0  -1   -1.16    2.29
  20   0  -1   -0.25    2.02
 -20   0   1    1.28    2.28
  20   0  -1    1.01    2.11
  19   0  -1    0.86    1.92
 -19   0   1   -0.41    2.29
  19   0  -1    0.37    1.84
  19   0  -1    1.71    1.78
 -18   0   1   -0.65    2.22
 -17   0   1    1.11    2.06
 -16   0   1    1.17    1.92
 -15   0   1    2.54    2.30
 -14   0   1   -0.21    2.11
 -13   0   1    0.68    2.47
 -12   0   1    0.63    2.26
 -11   0   1    0.17    2.13
 -10   0   1    2.29    2.15
  -9   0   1    0.48    1.85
  -8   0   1    1.03    1.62
   8   0  -1    0.33    1.30
  -7   0   1    0.05    1.66
   7   0  -1    0.76    1.11
   6   0  -1    2.47    1.34
  -6   0   1    1.93    1.58
   5   0  -1    1.97    0.99
  -5   0   1    0.27    1.30
   4   0  -1    0.76    0.83
  -4   0   1    0.20    0.83
  -3   0   1    1.05    0.54
  -2   0   1    1.28    0.33
  -1   0   1    0.56    0.21
   0   0   1    0.66    0.19
   1   0   1    1.19    0.30
   2   0   1    0.06    0.49
   3   0   1    2.21    0.88
   4   0   1   -0.03    1.17
   5   0   1   -0.12    1.29
  -5   0  -1    0.74    1.24
  -6   0  -1    0.57    1.62
  -6   0  -1   -0.75    1.30
  -7   0  -1    2.24    1.43
  -7   0  -1    0.60    1.64
  -8   0  -1    1.24    1.51
  -8   0  -1   -0.62    1.68
  -9   0  -1   -0.41    1.68
  -9   0  -1    0.62    1.49
 -10   0  -1   -0.45    1.58
 -10   0  -1    2.23    1.95
 -11   0  -1    0.97    2.12
 -12   0  -1   -0.53    2.28
 -13   0  -1    0.38    2.01
 -14   0  -1    1.23    1.97
 -15   0  -1    1.65    2.12
 -16   0  -1    1.78    2.07
 -17   0  -1    0.25    1.95
  18   0   1    4.28    2.26
 -18   0  -1    0.13    2.18
  18   0   1    3.90    2.11
  18   0   1    1.94    1.98
 -19   0  -1    1.55    2.37
  19   0   1    0.13    2.30
  19   0   1    3.68    2.17
  19   0   1    0.87    1.99
  20   0   1    3.33    2.27
  20   0   1    6.50    2.53
  20   0   1    3.19    2.61
 -20   0  -1    1.32    2.06
  21   0   1   -0.69    2.33
 -21   0  -1   -0.91    2.29
  21   0   1    0.55    2.32
  22   0   1    0.83    2.45
  22   0   1    2.92    2.67
 -22   0  -1    3.84    2.08
  23   0   1   -0.14    2.53
  23   0   1   -1.34    2.41
  24   0   1    2.99    2.52
  24   0   1   -0.80    1.96
  25   0   1    0.53    1.78
  25   0   1   -0.91    2.48
  26   0   1   -0.12    2.34
  26   0   1    2.42    1.77
  27   0   1    1.11    1.50
  27   0   1    0.76    2.16
  28   0   1    1.02    1.25
  28   0   1    3.09    2.03
  29   0   1    1.96    1.72
  29   0   1    2.34    1.06
  30   0   1    0.56    1.43
  30   0   1    1.35    1.33
 -31   0  -1   -0.30    1.09
  31   0   1    1.45    0.86
 -32   1   1    9.01    1.13
  32   1  -1    9.53    1.10
 -32   1   1   11.98    1.27
  32  -1  -1    8.86    1.10
 -31  -1   1   51.57    2.97
 -31   1   1   60.06    3.26
  31   1  -1   59.93    2.83
 -31   1   1   58.60    3.28
  30   1  -1   69.37    3.56
  30  -1  -1   68.66    3.45
  30   1  -1   71.84    3.92
  29  -1  -1   38.62    2.62
  29   1  -1   42.28    2.74
  29   1  -1   41.66    3.13
  28   1  -1  103.78    5.62
  28  -1  -1  103.62    5.23
  28   1  -1  102.64    5.29
  27   1  -1   11.99    2.54
  27  -1  -1   12.77    2.08
  27   1  -1   13.56    2.25
  26   1  -1   33.54    2.99
  26   1  -1   29.05    3.30
  26  -1  -1   30.47    2.90
  25  -1  -1  114.45    5.97
  25   1  -1  103.12    6.16
  24  -1  -1  133.64    6.74
  24   1  -1  119.26    6.81
 -23   1   1   12.10    2.40
  23   1  -1   11.87    2.87
  23  -1  -1   12.38    2.46
  22   1  -1   -1.79    2.46
 -22   1   1   -0.15    2.17
  22   1  -1   -1.49    2.59
  21   1  -1   74.65    5.12
 -21   1   1   91.89    5.35
  21  -1  -1   78.11    4.87
  21   1  -1   84.39    5.24
  20   1  -1   45.14    3.77
  20   1  -1   40.83    3.36
  20  -1  -1   48.10    3.56
  20   1  -1   42.97    3.74
 -20   1   1   47.63    3.91
  19   1  -1  178.60    8.67
  19   1  -1  180.46    8.89
 -19   1   1  199.58    9.16
  19   1  -1  183.48    8.96
  18   1  -1   10.65    2.45
 -18   1   1   12.45    2.36
 -17   1   1  367.17   15.99
 -16   1   1   12.17    2.60
 -15   1   1  135.50    6.93
 -14   1   1   18.00    2.76
 -13   1   1  984.55   39.74
 -12   1   1    6.48    2.60
 -11   1   1  224.06   10.02
 -10   1   1  528.03   21.68
  -9   1   1 1352.87   53.72
  -8   1   1  147.42    6.90
   8   1  -1  156.39    6.79
   7   1  -1 1622.46   60.22
  -7   1   1 1432.96   60.20
  -6   1   1  946.16   38.49
   6   1  -1  997.38   38.47
  -5   1   1  316.69   12.84
   5   1  -1  315.83   12.80
  -4   1   1  114.31    4.88
   4   1  -1  114.99    4.86
  -3   1   1 1845.74   72.19
  -2   1   1  407.22   15.66
  -2  -1   1  384.64   15.73
  -1   1   1  112.65    4.43
  -1  -1   1  109.15    4.54
   1   1   1 1188.90   46.48
   2  -1   1   12.74    0.71
   2   1   1   11.22    0.81
  -2  -1  -1   13.02    0.67
   3   1   1  575.12   23.30
  -3  -1  -1  595.08   23.11
  -4  -1  -1 1610.93   63.44
   4   1   1 1660.66   63.74
   5   1   1   77.20    3.78
  -5   1  -1   80.71    3.88
  -5   1  -1   78.11    3.79
  -6   1  -1  173.25    7.49
  -6   1  -1  173.22    7.45
  -7   1  -1  395.78   16.02
  -7   1  -1  384.43   15.97
  -8   1  -1  100.54    4.85
  -8   1  -1   96.62    4.69
  -9   1  -1   17.51    2.29
  -9   1  -1   15.67    1.96
 -10   1  -1  429.89   17.63
 -10   1  -1  419.80   17.64
 -11   1  -1    7.36    2.38
 -12   1  -1   50.39    3.56
 -13   1  -1    3.64    2.21
 -14   1  -1  681.42   27.96
 -15   1  -1   27.01    2.88
 -16   1  -1  103.74    5.72
 -17   1  -1  110.16    6.08
 -18   1  -1  493.26   20.17
  18   1   1  474.13   19.86
  18  -1   1  466.22   19.88
  18   1   1  457.18   19.87
  18   1   1  455.97   20.02
  19  -1   1   28.18    2.99
  19  -1   1   28.60    3.02
  19   1   1   23.30    3.12
  19   1   1   28.16    3.27
  19   1   1   27.64    2.87
 -19   1  -1   28.43    3.03
  20   1   1    9.85    2.63
 -20   1  -1    9.63    2.62
  20  -1   1   13.31    2.64
  20   1   1    7.43    2.47
  20   1   1   14.41    2.53
  21   1   1  188.63    9.44
  21   1   1  187.09    9.30
 -21   1  -1  191.67    9.43
  21   1   1  182.23    9.12
  21  -1   1  197.59    9.22
  22   1   1  304.17   13.25
 -22   1  -1  290.57   13.29
  22   1   1  280.74   13.20
  22  -1   1  280.99   12.95
  23   1   1    4.00    2.68
  23  -1   1    6.07    2.30
  23  -1   1    5.09    1.96
  23   1   1    4.11    2.70
  24  -1   1   71.38    4.31
  24   1   1   69.97    4.73
  24   1   1   70.26    4.81
  25   1   1  151.97    7.54
  25  -1   1  139.80    6.98
  26   1   1  193.80    8.80
  26  -1   1  178.27    8.58
  26   1   1  208.75    9.25
  27  -1   1   25.18    2.11
  27   1   1   20.35    2.21
  27   1   1   25.23    2.78
  28  -1   1  115.08    5.56
  28   1   1  120.48    5.72
  29  -1   1   84.64    4.47
  29   1   1   88.92    4.06
  29  -1   1   75.46    3.83
  30   1   1    9.15    0.97
  30  -1   1   12.44    1.61
 -31   1  -1   36.89    2.10
  31  -1   1   33.63    1.90
 -31   1  -1   33.65    2.05
  31   1   1   29.50    1.84
  32  -2  -1   28.78    1.72
 -32   2   1   26.95    1.69
 -32   2   1   27.20    1.72
 -32  -2   1   25.75    1.67
 -31  -2   1   12.48    1.27
 -31  -2   1   16.33    1.73
 -31   2   1   12.16    1.66
  31   2  -1   14.52    1.28
 -31   2   1   15.05    1.73
  30   2  -1   52.41    3.12
  30  -2  -1   51.28    3.13
  30   2  -1   46.97    2.79
  29  -2  -1   15.24    1.68
  29   2  -1   14.85    1.79
  29   2  -1   11.08    2.12
  29  -2  -1   12.22    2.11
  28  -2  -1   26.66    2.33
  28  -2  -1   32.17    2.94
  28   2  -1   27.81    2.53
  28   2  -1   29.34    2.78
  27  -2  -1  144.44    7.19
  27   2  -1  139.42    6.93
  27  -2  -1  135.84    6.76
  27   2  -1  143.82    7.13
  26  -2  -1  115.81    6.36
  26   2  -1  114.87    6.34
  26  -2  -1  120.07    6.08
  25   2  -1    3.10    2.38
  25  -2  -1    3.67    2.00
  25  -2  -1   -0.39    2.37
  24  -2  -1    4.00    2.22
  24   2  -1    2.68    2.50
  24  -2  -1    2.57    2.37
  23  -2  -1  142.12    7.33
  23  -2  -1  138.47    7.01
 -23  -2   1  122.04    7.05
  23   2  -1  144.00    7.30
 -23   2   1  124.23    7.08
  22  -2  -1   78.19    4.74
  22   2  -1   68.57    4.84
 -22  -2   1   73.53    4.95
 -22   2   1   72.99    4.93
  22  -2  -1   66.49    4.80
  22   2  -1   77.74    5.06
 -21   2   1    7.54    2.61
 -21  -2   1    8.38    2.63
  21  -2  -1    3.72    2.35
  21   2  -1    6.65    2.77
  21   2  -1    6.01    2.07
  21   2  -1    5.06    2.50
  21  -2  -1    4.71    2.15
  20  -2  -1   18.52    2.79
 -20   2   1   22.01    3.05
 -20  -2   1   20.66    3.03
  20   2  -1   21.65    3.15
  20   2  -1   20.71    2.90
  20   2  -1   16.27    2.46
  19   2  -1   18.64    3.03
  19   2  -1   20.56    2.77
  19   2  -1   17.28    2.39
 -19  -2   1   29.35    3.09
  19  -2  -1   19.28    2.75
 -19   2   1   21.65    2.93
  18  -2  -1   12.64    2.51
  18   2  -1   12.52    2.60
 -18   2   1   13.16    2.51
 -18  -2   1   13.15    2.57
 -17  -2   1  154.05    7.60
 -17   2   1  146.69    7.58
 -16  -2   1    4.82    2.38
 -16   2   1    5.05    2.30
 -15  -2   1    5.13    2.29
 -15   2   1    8.87    2.37
 -14  -2   1   36.22    3.41
 -14   2   1   35.31    3.39
 -13  -2   1  367.54   15.42
 -13   2   1  350.15   15.39
 -12  -2   1   74.97    4.65
 -12   2   1   73.60    4.58
 -11   2   1 1103.62   44.94
 -11  -2   1 1141.95   44.96
 -10   2   1   31.04    2.88
 -10  -2   1   27.68    2.85
  -9   2   1   79.52    4.39
  -9  -2   1   86.06    4.40
  -8   2   1  402.25   17.35
   8  -2  -1  432.92   17.30
  -8  -2   1  414.99   17.36
   8   2  -1  442.20   17.33
  -7   2   1 1275.93   52.98
   7  -2  -1 1399.54   52.99
   7   2  -1 1390.77   53.00
  -7  -2   1 1302.12   52.98
  -6  -2   1  432.46   18.07
   6  -2  -1  464.48   18.09
   6   2  -1  461.18   18.09
  -6   2   1  437.28   18.08
   5  -2  -1  595.47   22.94
  -5  -2   1  550.07   22.85
  -5   2   1  574.59   22.91
   5   2  -1  589.81   22.93
  -5  -2   1  576.96   22.92
  -4  -2   1  144.81    6.28
  -4   2   1  147.67    6.23
  -4  -2   1  155.42    6.25
   4  -2  -1  157.05    6.28
   4   2  -1  148.33    6.27
  -3  -2   1   40.05    2.07
   3   2  -1   40.62    1.98
   3  -2  -1   42.87    1.97
  -3  -2   1   43.59    1.94
  -3   2   1   42.07    1.93
  -2   2   1  935.18   36.69
  -2  -2   1  894.37   36.85
  -2  -2   1  959.94   36.70
  -1  -2   1 1862.40   72.89
   0   2   1   21.24    0.95
   0  -2   1   22.77    0.96
   1  -2   1  832.94   33.28
  -1  -2  -1  877.99   33.36
   1   2   1  850.68   33.28
   2  -2   1 1164.16   48.19
  -2  -2  -1 1266.71   48.18
   2  -2   1 1276.10   48.22
   2   2   1 1215.85   48.19
   3  -2   1  173.51    6.84
  -3  -2  -1  174.51    6.79
   3  -2   1  159.10    6.95
   3   2   1  157.04    6.92
  -4   2  -1   26.70    1.79
   4  -2   1   28.21    1.89
  -4  -2  -1   25.97    1.47
   4   2   1   26.23    1.87
  -4  -2  -1   29.42    1.84
  -5   2  -1  373.60   15.28
  -5  -2  -1  388.75   15.32
  -5  -2  -1  389.71   15.34
  -5   2  -1  364.71   15.30
  -5  -2  -1  372.78   14.96
  -6  -2  -1  167.91    7.26
  -6   2  -1  162.98    7.18
  -6   2  -1  158.65    7.22
  -6  -2  -1  169.31    7.22
  -6  -2  -1  166.97    6.79
  -7  -2  -1   90.42    4.29
  -7  -2  -1   88.94    4.39
  -7   2  -1   85.59    4.36
  -7   2  -1   83.61    4.22
  -8  -2  -1  311.34   12.86
  -8   2  -1  306.54   12.85
  -8  -2  -1  314.64   12.89
  -8   2  -1  293.30   12.85
  -9   2  -1   13.20    1.79
  -9   2  -1   13.51    2.11
  -9  -2  -1   17.31    2.23
  -9  -2  -1   14.25    1.86
 -10   2  -1  330.68   14.42
 -10  -2  -1  369.40   14.54
 -10   2  -1  338.96   14.50
 -10  -2  -1  334.04   14.51
 -11  -2  -1  132.77    6.54
 -11   2  -1  133.61    6.59
 -12   2  -1   60.61    4.05
 -12  -2  -1   71.83    4.19
 -13   2  -1   26.86    2.94
 -13  -2  -1   28.80    3.00
 -14   2  -1   38.67    3.32
 -14  -2  -1   35.60    3.26
 -15   2  -1   11.27    2.47
 -15  -2  -1   13.93    2.47
 -16  -2  -1   26.94    2.82
 -16   2  -1   29.44    2.90
 -17   2  -1   24.96    2.92
  17  -2   1   22.78    2.69
 -17  -2  -1   22.42    2.85
  18   2   1  244.86   11.50
 -18  -2  -1  274.47   11.92
 -18   2  -1  270.23   11.92
  18   2   1  251.89   11.64
  18  -2   1  243.24   11.58
  18   2   1  256.88   11.93
  19   2   1  217.63   10.06
 -19  -2  -1  203.91    9.80
  19   2   1  201.36    9.71
  19  -2   1  183.26    9.58
  19   2   1  201.01    9.55
  19  -2   1  211.99    9.55
 -19   2  -1  199.85    9.80
  20  -2   1  115.41    6.49
  20  -2   1  126.88    6.84
  20   2   1  124.25    6.82
 -20  -2  -1  128.63    6.87
  20   2   1  129.44    6.67
 -20   2  -1  131.71    6.91
  20   2   1  121.12    7.07
 -21   2  -1   14.64    2.95
  21  -2   1   13.17    2.22
  21   2   1    9.43    2.99
  21   2   1   11.16    2.68
  21  -2   1   10.61    2.73
 -21  -2  -1   13.02    2.85
  21   2   1   11.04    2.47
  21  -2   1   11.85    2.48
  22   2   1   27.09    3.45
  22  -2   1   18.25    3.13
  22   2   1   22.48    3.14
  22  -2   1   19.99    2.50
 -22   2  -1   22.79    2.88
 -22  -2  -1   21.28    2.84
  22   2   1   25.49    2.85
  23   2   1  153.17    8.14
  23   2   1  163.11    8.00
  23  -2   1  151.80    7.47
  23  -2   1  148.00    7.94
  24  -2   1  423.51   18.36
  24  -2   1  443.20   18.88
  24   2   1  433.80   18.92
  24   2   1  454.10   18.91
  25  -2   1   38.21    2.81
  25  -2   1   33.68    3.46
  25   2   1   34.67    3.42
  26  -2   1  100.67    5.49
  26   2   1   95.01    5.40
  26  -2   1   89.77    4.79
  27  -2   1   72.28    4.05
  27   2   1   80.17    4.34
  27   2   1   82.53    4.73
  28  -2   1  252.09    9.89
  28  -2   1  210.33    9.73
  28  -2   1  199.73    9.11
  28   2   1  240.54    9.79
  28   2   1  210.96    9.38
  29  -2   1   49.91    3.18
  29  -2   1   46.09    3.11
  29   2   1   48.21    2.73
  30   2   1  141.33    5.53
  30  -2   1  134.55    5.51
  31  -2   1    9.21    1.03
 -31  -2  -1    8.53    1.13
 -31   2  -1    6.02    1.11
 -31  -3   1    4.70    1.26
  31   3  -1    3.38    0.92
 -31   3   1    0.89    1.13
  30   3  -1    0.46    1.14
 -30   3   1   -1.01    1.50
 -30  -3   1    0.21    1.51
  29   3  -1  197.07    8.53
  29   3  -1  177.48    8.32
  29  -3  -1  195.74    8.57
  28  -3  -1    0.14    1.40
  28   3  -1    2.62    2.02
  28   3  -1    1.50    1.70
  28  -3  -1    0.48    1.96
  27   3  -1  298.73   13.19
  27  -3  -1  295.25   12.87
  27  -3  -1  310.75   13.28
  26  -3  -1    8.14    1.92
  26   3  -1    7.61    2.44
  26  -3  -1    3.24    2.34
  25  -3  -1   29.19    3.30
  25  -3  -1   26.39    2.66
  25   3  -1   24.99    3.09
  24  -3  -1    4.12    2.38
  24  -3  -1    1.98    1.86
  24   3  -1    0.92    2.38
  23  -3  -1  567.80   23.77
 -23   3   1  537.20   23.79
  23   3  -1  571.24   23.76
  23  -3  -1  585.55   23.59
 -23  -3   1  546.23   23.79
 -22  -3   1   46.55    3.82
  22  -3  -1   51.99    4.16
  22  -3  -1   51.78    3.73
  22   3  -1   51.71    4.10
  22   3  -1   37.20    4.15
 -22   3   1   49.63    3.93
  21  -3  -1  640.84   25.83
  21   3  -1  645.90   26.01
  21  -3  -1  617.08   25.94
  21   3  -1  580.16   25.52
  21   3  -1  608.91   26.16
 -21  -3   1  645.27   26.13
 -21   3   1  607.28   26.04
  20   3  -1   16.07    3.17
 -20  -3   1   21.57    2.82
  20   3  -1   23.02    3.06
  20  -3  -1   22.29    2.99
 -20   3   1   24.95    2.96
  20   3  -1   18.35    2.44
  20  -3  -1   24.00    2.76
  19   3  -1   14.00    2.70
 -19   3   1   13.08    2.60
  19   3  -1   12.05    2.15
 -19  -3   1   16.04    2.74
  19  -3  -1   13.39    2.27
  19   3  -1   18.47    3.15
  19  -3  -1   14.34    2.72
 -18   3   1   35.32    3.38
  18   3  -1   31.89    3.09
 -18  -3   1   38.08    3.38
  18  -3  -1   29.23    3.04
  18   3  -1   38.92    3.83
 -17   3   1 1669.24   66.83
 -17  -3   1 1672.02   66.83
 -16   3   1   35.33    3.11
 -16  -3   1   28.23    2.97
 -15  -3   1  836.92   33.61
 -15   3   1  806.39   33.55
 -14  -3   1    3.72    2.12
 -14   3   1    2.53    2.22
 -13  -3   1  256.23   11.43
 -13   3   1  254.41   11.44
 -12   3   1  267.67   12.21
 -12  -3   1  289.45   12.26
 -11   3   1  802.21   33.24
 -11  -3   1  843.01   33.27
 -10   3   1   32.29    2.84
 -10  -3   1   30.33    2.81
  -9   3   1  531.25   22.12
  -9  -3   1  553.70   22.14
  -8   3   1   13.10    1.88
  -8  -3   1   10.90    1.80
  -7   3   1    3.81    1.43
  -7  -3   1    2.01    1.12
  -7  -3   1    1.79    1.39
  -6  -3   1   42.31    2.41
  -6  -3   1   43.43    2.35
   6  -3  -1   42.77    2.38
  -6   3   1   40.11    2.38
   6   3  -1   42.96    2.41
  -5  -3   1   20.00    1.42
   5  -3  -1   17.50    1.49
  -5   3   1   23.17    1.46
  -5  -3   1   18.34    1.62
   5   3  -1   17.66    1.47
   4   3  -1  205.72    8.42
   4  -3  -1  208.02    8.40
  -4  -3   1  205.69    8.50
  -4  -3   1  202.70    8.32
  -4   3   1  204.74    8.32
   3  -3  -1   16.51    1.10
   3   3  -1   14.50    1.11
  -3  -3   1   16.94    0.96
  -3   3   1   15.60    0.95
  -3  -3   1   14.46    1.44
   2   3  -1   14.67    0.89
  -2  -3   1   15.12    0.77
  -2  -3   1   14.31    1.24
  -2   3   1   13.56    0.76
   2  -3  -1   16.57    0.88
  -1  -3   1  243.11   10.33
  -1   3   1  253.00   10.02
  -1  -3   1  259.24   10.02
   0   3   1  246.50    9.67
   0  -3  -1  253.83    9.96
   0  -3   1  249.51   10.00
   0  -3   1  243.58    9.67
   1   3   1  482.28   19.15
  -1  -3  -1  492.76   19.32
   1  -3   1  489.46   19.17
   2   3   1  423.72   16.90
  -2  -3  -1  422.21   16.95
   2  -3   1  434.71   17.01
   2  -3   1  425.19   16.93
  -3  -3  -1   76.47    3.38
  -3   3  -1   76.23    3.42
   3  -3   1   75.76    3.46
   3   3   1   69.12    3.41
  -3  -3  -1   77.61    3.48
  -3  -3  -1   76.01    3.42
  -4  -3  -1  262.74   10.44
   4  -3   1  252.33   10.35
  -4   3  -1  259.44   10.43
  -4  -3  -1  257.10   10.46
  -4   3  -1  244.14   10.44
  -4  -3  -1  247.91   10.26
  -5  -3  -1   25.86    1.49
  -5   3  -1   21.16    1.96
  -5  -3  -1   23.07    1.83
  -5   3  -1   23.50    1.82
  -5  -3  -1   21.23    1.93
   5  -3   1   24.18    1.65
  -6   3  -1  761.40   30.41
  -6  -3  -1  791.67   30.41
  -6   3  -1  776.10   30.40
  -6  -3  -1  800.84   30.43
   6  -3   1  740.86   30.16
  -6  -3  -1  732.04   30.06
  -7   3  -1    4.25    1.40
  -7  -3  -1    5.07    1.79
  -7   3  -1    4.47    1.63
  -7  -3  -1    5.70    1.47
  -7  -3  -1    3.97    0.96
  -8  -3  -1 2545.27   98.11
  -8  -3  -1 2443.54   98.08
  -8   3  -1 2487.15   98.07
  -8   3  -1 2494.92   98.08
  -9  -3  -1  660.39   26.16
  -9   3  -1  626.84   26.11
  -9   3  -1  631.19   26.14
  -9  -3  -1  660.81   26.17
 -10   3  -1  225.41    9.73
 -10  -3  -1  211.92    9.58
 -10   3  -1  213.47    9.60
 -10  -3  -1  219.74    9.72
  11  -3   1  296.45   12.24
 -11  -3  -1  305.61   12.96
 -11   3  -1  297.91   12.91
 -12   3  -1  945.63   37.86
  12  -3   1  904.78   37.10
 -12  -3  -1 1019.24   37.94
 -13  -3  -1   75.17    4.56
 -13   3  -1   78.11    4.53
  13  -3   1   74.08    3.49
 -14  -3  -1 1823.86   70.68
 -14   3  -1 1728.67   70.61
 -15  -3  -1   36.55    3.30
 -15   3  -1   34.62    3.28
 -16   3  -1  301.53   13.40
 -16  -3  -1  299.74   13.40
  17   3   1   33.87    3.42
  17   3   1   23.87    2.89
  17   3   1   25.13    2.58
 -17   3  -1   23.86    2.97
  17  -3   1   21.15    2.83
 -17  -3  -1   27.90    3.21
 -17  -3  -1   28.80    2.96
  18  -3   1  474.33   20.10
  18   3   1  483.98   20.42
 -18  -3  -1  507.36   20.60
  18   3   1  479.90   20.76
  18  -3   1  457.25   20.33
 -18   3  -1  497.68   20.58
  18   3   1  468.39   20.26
  19   3   1    0.85    2.03
  19   3   1    4.13    2.37
 -19  -3  -1    3.99    2.34
 -19   3  -1    1.30    2.27
  19  -3   1    1.69    2.13
  19  -3   1    3.99    1.77
  19   3   1    2.48    2.94
  20   3   1  741.70   31.62
  20  -3   1  762.54   31.68
 -20  -3  -1  794.06   31.89
  20   3   1  812.78   32.12
  20   3   1  756.78   31.53
  20  -3   1  749.92   31.31
 -20   3  -1  770.07   31.85
  21   3   1   27.30    3.35
 -21   3  -1   20.23    2.90
  21  -3   1   26.22    2.59
  21  -3   1   23.32    3.26
  21   3   1   24.29    2.91
  21   3   1   34.43    3.74
 -21  -3  -1   25.41    2.97
  22  -3   1   25.90    3.14
  22   3   1   26.02    3.48
 -22   3  -1   26.47    3.24
 -22  -3  -1   24.07    3.15
  22   3   1   25.39    3.10
  22   3   1   25.81    2.91
  22  -3   1   23.88    2.54
  23   3   1    6.60    2.24
  23   3   1   11.10    3.10
  23  -3   1    7.05    2.70
  23  -3   1    6.44    1.91
  23   3   1    9.39    2.65
  24  -3   1   21.01    2.30
  24   3   1   27.38    3.08
  24  -3   1   23.21    3.05
  25   3   1    3.56    2.30
  25  -3   1    3.18    2.41
  25  -3   1    5.44    1.62
  26   3   1  172.98    8.14
  26  -3   1  166.89    8.15
  26  -3   1  167.04    7.56
  27  -3   1   -1.37    2.10
  27  -3   1    2.40    2.03
  27   3   1    2.11    1.48
  27   3   1   -1.43    2.02
  28  -3   1   55.02    3.48
  28  -3   1   51.35    3.37
  28   3   1   51.47    3.31
  28   3   1   47.16    2.97
  29  -3   1    4.90    1.58
  29  -3   1    3.14    1.54
  29   3   1    4.33    1.22
  29   3   1    5.61    1.55
 -30   3  -1   14.92    1.61
  30   3   1   15.40    1.20
  30  -3   1   15.55    1.65
 -30  -3  -1   14.40    1.61
 -31   3  -1    0.88    0.92
  31   4  -1   79.06    3.22
 -31   4   1   84.87    3.59
 -31  -4   1   62.81    3.17
 -30  -4   1    8.66    1.57
  30   4  -1    9.95    1.41
 -30   4   1   10.07    1.55
 -30   4   1    8.06    1.82
  29   4  -1  130.36    5.57
  29   4  -1  132.62    5.55
  29  -4  -1  135.10    5.65
  28   4  -1   63.08    3.54
  28   4  -1   51.17    3.32
  28  -4  -1   56.88    3.51
  28  -4  -1   51.66    3.72
  27  -4  -1   95.12    5.14
  27   4  -1   86.25    5.00
  27  -4  -1   95.04    5.45
  26  -4  -1   35.19    3.26
  26  -4  -1   34.96    2.77
  26   4  -1   36.30    3.24
  25   4  -1  920.14   36.18
  25  -4  -1  865.61   35.84
  25  -4  -1  877.67   36.17
  24  -4  -1   43.89    3.26
  24  -4  -1   39.35    3.64
  24   4  -1   41.06    3.62
  23   4  -1  222.77   10.43
  23  -4  -1  212.60   10.09
  23  -4  -1  224.61   10.43
  22   4  -1   19.33    2.41
  22   4  -1   19.99    2.95
 -22   4   1   23.02    2.92
  22  -4  -1   20.51    3.03
  22  -4  -1   19.93    2.58
 -22  -4   1   18.52    2.68
 -21   4   1  823.49   34.51
 -21  -4   1  855.81   34.59
  21  -4  -1  809.65   34.37
  21   4  -1  830.94   34.41
  21   4  -1  918.12   34.98
  21  -4  -1  850.49   34.26
  21   4  -1  803.55   34.00
 -20  -4   1   95.94    5.72
 -20   4   1   89.80    5.65
  20  -4  -1  100.75    5.76
  20   4  -1  108.40    6.31
  20   4  -1   88.57    5.20
  20  -4  -1  104.32    5.55
  20   4  -1  103.21    5.79
  19  -4  -1 2572.83   99.63
  19   4  -1 2622.44  100.21
  19   4  -1 2339.27   99.29
  19   4  -1 2472.43   99.69
 -19   4   1 2596.03   99.92
 -19  -4   1 2710.82  100.01
  19  -4  -1 2414.98   99.64
  18   4  -1   16.18    2.18
  18   4  -1   17.37    2.60
 -18   4   1   22.43    2.81
  18   4  -1   15.58    3.13
  18  -4  -1   19.85    2.40
 -18  -4   1   22.47    2.90
  18  -4  -1   18.83    2.65
 -17  -4   1   35.42    3.58
 -17   4   1   39.74    3.37
 -17  -4   1   44.60    3.53
 -16   4   1   74.73    4.88
 -16  -4   1   80.86    4.90
 -15  -4   1 2665.19  103.58
 -15   4   1 2568.13  103.53
 -14  -4   1  193.86    8.89
 -14   4   1  181.71    8.84
 -13  -4   1 1785.45   70.16
 -13   4   1 1743.40   70.15
 -12  -4   1    2.70    2.18
 -12   4   1    0.29    2.01
 -11  -4   1  135.28    6.47
 -11   4   1  126.07    6.46
 -10  -4   1  389.52   16.16
 -10   4   1  383.47   16.15
  -9   4   1 1094.06   43.73
  -9  -4   1 1103.59   43.73
  -8  -4   1   81.14    3.85
  -8   4   1   73.66    3.89
  -8  -4   1   72.19    3.83
  -7   4   1  321.37   12.94
  -7  -4   1  308.05   12.96
  -7  -4   1  316.13   12.93
  -6   4   1   91.75    4.14
  -6  -4   1   95.06    4.32
  -6  -4   1   88.81    4.14
  -5  -4   1  104.15    4.71
  -5   4   1  102.02    4.42
  -5  -4   1  104.86    4.44
  -4  -4   1    4.65    0.70
  -4  -4   1    4.30    1.12
  -4   4   1    4.97    0.70
  -3   4   1  100.82    4.04
  -3  -4   1   97.50    4.05
  -3  -4   1   98.28    4.51
   3   4  -1  100.22    4.21
   2   4  -1  379.07   15.20
  -2  -4   1  389.36   15.10
  -2  -4   1  375.91   15.53
  -1  -4   1   91.70    4.29
   1  -4  -1   98.78    4.33
   0  -4   1  860.52   34.81
   0  -4  -1  897.73   34.77
  -1  -4  -1 1187.94   45.45
  -1  -4  -1 1177.03   45.14
  -1   4  -1 1130.04   45.14
  -1   4  -1 1158.48   45.14
  -1  -4  -1 1137.57   45.14
  -2  -4  -1    4.87    1.13
  -2   4  -1    5.66    0.87
  -2  -4  -1   10.02    0.88
  -2   4  -1    4.91    0.83
  -2  -4  -1    9.64    0.95
  -3  -4  -1  393.33   15.95
   3  -4   1  409.57   16.14
  -3   4  -1  401.57   15.95
  -3  -4  -1  404.18   15.94
  -3  -4  -1  411.78   16.01
  -3   4  -1  376.67   15.93
  -4  -4  -1  825.18   32.00
  -4  -4  -1  816.57   32.02
  -4   4  -1  804.41   32.03
   4  -4   1  824.42   32.12
  -4   4  -1  783.17   32.02
  -4  -4  -1  798.39   32.02
  -5   4  -1  219.07    9.51
  -5  -4  -1  229.46    9.55
   5  -4   1  222.63    9.52
  -5   4  -1  226.55    9.55
  -5  -4  -1  235.70    9.51
  -5  -4  -1  229.65    9.40
   6  -4   1  698.48   27.86
  -6  -4  -1  709.40   27.74
  -6   4  -1  671.39   27.91
  -6  -4  -1  703.53   27.94
  -6   4  -1  679.29   27.91
  -6  -4  -1  720.64   27.94
  -7   4  -1  496.55   20.40
  -7  -4  -1  508.59   20.40
  -7   4  -1  483.29   20.40
  -7  -4  -1  518.05   20.44
   7  -4   1  484.99   20.24
  -7  -4  -1  516.76   20.12
   8  -4   1    2.19    1.44
  -8   4  -1    1.17    1.92
  -8  -4  -1    1.93    1.60
  -8  -4  -1    1.23    1.13
  -8   4  -1    1.04    1.52
  -8  -4  -1    3.27    1.93
  -9   4  -1  170.99    7.80
   9  -4   1  162.96    7.37
  -9  -4  -1  180.43    7.85
  10  -4   1 2704.59  109.37
 -10   4  -1 2752.71  109.79
 -10  -4  -1 2969.11  109.86
 -11   4  -1  101.40    5.62
  11  -4   1  108.14    5.05
  12  -4   1 1678.91   67.88
 -12   4  -1 1734.95   68.51
 -12  -4  -1 1805.63   68.58
 -13   4  -1  200.63    9.08
 -13  -4  -1  217.43    9.15
 -14   4  -1  205.12    9.90
 -14  -4  -1  228.81   10.05
 -15  -4  -1    4.17    2.02
 -15   4  -1    3.44    1.99
 -16  -4  -1 2448.05   95.34
 -16   4  -1 2358.17   95.25
 -17  -4  -1    6.78    2.58
 -17   4  -1    9.50    2.32
 -17  -4  -1   11.52    2.32
  17  -4   1    8.02    2.31
  17   4   1    5.85    2.01
  17   4   1   11.94    2.48
  18  -4   1  540.74   23.09
 -18  -4  -1  584.12   23.67
  18  -4   1  546.71   23.42
 -18  -4  -1  582.48   23.88
  18   4   1  558.39   23.46
 -18   4  -1  549.13   23.54
  18   4   1  561.01   23.35
 -19   4  -1    3.71    2.38
  19  -4   1    2.46    2.29
 -19  -4  -1    5.99    2.42
  19   4   1    3.38    2.04
  19   4   1    4.26    2.35
  19  -4   1    1.26    1.69
  20  -4   1  561.86   24.25
 -20   4  -1  600.66   24.87
  20   4   1  574.27   25.13
  20  -4   1  593.12   24.74
  20   4   1  596.21   24.71
 -20  -4  -1  625.09   24.95
  20   4   1  580.47   24.55
  21  -4   1    2.38    1.75
 -21   4  -1    1.47    2.12
 -21  -4  -1    0.59    1.95
  21  -4   1    1.21    2.34
  21   4   1    1.59    2.35
  21   4   1    4.93    3.05
  21   4   1    2.31    2.12
  22  -4   1  914.95   37.95
  22   4   1  956.84   38.28
  22   4   1  975.71   38.87
  22  -4   1  920.93   38.43
  22   4   1  950.91   38.44
  23   4   1   30.45    3.25
  23  -4   1   31.60    3.32
  23   4   1   23.65    3.41
  23   4   1   26.22    2.87
  23  -4   1   27.63    2.45
  24   4   1   69.96    4.64
  24  -4   1   69.91    4.64
  24  -4   1   72.53    4.01
  25   4   1   -0.44    2.19
  25  -4   1   -0.23    2.14
  25  -4   1    1.08    1.31
  26  -4   1   64.76    4.39
  26  -4   1   72.98    4.28
  26   4   1   80.60    4.30
  26  -4   1   55.68    3.69
  27  -4   1   72.31    4.46
  27  -4   1   79.45    4.35
  27   4   1   72.93    4.22
  28   4   1  199.22    8.63
  28  -4   1  195.05    8.66
  28   4   1  193.62    8.53
  28  -4   1  192.60    8.83
  29  -4   1    7.30    1.43
  29   4   1   10.41    1.48
  29   4   1    8.67    1.26
  29  -4   1    9.64    1.73
 -30   4  -1   35.09    2.36
  30  -4   1   57.37    2.71
 -30  -4  -1   44.34    2.46
 -30   4  -1   55.56    2.80
  30   4   1   47.20    2.31
 -31   5   1   35.43    2.07
  31   5  -1   33.17    1.83
  30   5  -1    0.96    1.09
  30  -5  -1    3.19    1.46
 -30   5   1    1.58    1.01
 -30   5   1    3.27    1.50
 -30  -5   1    3.66    1.07
  29   5  -1  376.92   13.37
 -29   5   1  289.34   13.13
 -29   5   1  338.54   13.55
 -29  -5   1  331.73   13.26
  29  -5  -1  265.14   12.87
  29  -5  -1  366.78   13.62
  28  -5  -1   -1.02    2.09
  28  -5  -1    1.01    1.59
  28   5  -1    1.90    1.57
  28  -5  -1    1.25    1.50
  27  -5  -1  299.82   12.97
  27  -5  -1  306.43   12.60
  27   5  -1  300.51   12.51
  26   5  -1   13.97    2.28
  26  -5  -1   11.15    2.72
  26  -5  -1   11.96    2.26
  25   5  -1   18.26    2.57
  25  -5  -1   22.32    3.16
  25  -5  -1   20.76    2.71
  24   5  -1    0.95    2.15
  24  -5  -1    1.34    1.70
  24  -5  -1    1.34    2.10
  23  -5  -1  879.22   35.20
  23  -5  -1  841.74   34.92
  23   5  -1  860.14   35.17
  22  -5  -1   42.89    3.63
  22   5  -1   43.10    3.67
  22  -5  -1   38.15    3.21
 -22   5   1   35.06    3.33
 -22  -5   1   38.69    3.41
  21  -5  -1  684.69   28.41
  21   5  -1  693.48   28.44
 -21   5   1  647.56   28.41
  21  -5  -1  692.44   28.25
 -21  -5   1  701.35   28.58
  20   5  -1    4.43    2.48
 -20  -5   1    4.42    2.23
  20  -5  -1    4.84    2.04
 -20   5   1    5.74    2.12
  20  -5  -1    5.56    2.43
 -19  -5   1    4.75    2.17
 -19   5   1    0.83    1.99
  19  -5  -1    1.53    2.23
  19  -5  -1    3.87    2.01
  19   5  -1    3.98    2.37
  18   5  -1  119.25    6.80
  18  -5  -1  121.76    6.78
  18  -5  -1  129.08    6.73
 -18  -5   1  150.74    7.54
 -18   5   1  130.62    6.96
 -18  -5   1  147.15    7.15
  17   5  -1  910.99   34.54
 -17  -5   1  857.27   34.00
 -17   5   1  797.94   33.89
  17  -5  -1  772.26   33.73
 -17  -5   1  827.28   34.20
 -16  -5   1    4.20    2.18
 -16   5   1    3.94    2.14
  16  -5  -1    3.51    1.22
 -15   5   1  868.10   34.74
 -15  -5   1  939.78   34.86
 -14  -5   1   66.85    4.15
 -14   5   1   61.91    4.14
  14  -5  -1   64.32    3.54
 -13  -5   1   47.82    3.39
 -13   5   1   46.53    3.41
 -12   5   1  241.34   11.17
 -12  -5   1  270.67   11.28
 -11   5   1  350.13   15.20
 -11  -5   1  373.40   15.25
 -10  -5   1  158.16    7.05
 -10   5   1  148.57    7.03
  -9   5   1  698.09   28.40
  -9  -5   1  712.35   28.41
  -9  -5   1  713.14   28.49
  -8   5   1  166.66    7.40
  -8  -5   1  166.13    7.39
  -8  -5   1  182.97    7.61
  -7  -5   1  400.09   15.48
  -7  -5   1  375.71   15.69
  -7   5   1  369.12   15.42
  -6  -5   1  642.83   25.28
  -6   5   1  611.84   24.90
  -6  -5   1  639.20   24.94
  -5  -5   1  217.15    9.05
  -5  -5   1  213.41    8.60
  -5   5   1  208.84    8.58
  -4   5   1  248.12   10.10
  -4  -5   1  257.92   10.62
  -4  -5   1  258.99   10.12
  -3  -5   1  781.46   31.84
  -3  -5   1  811.32   31.31
  -3   5   1  792.29   31.29
  -2  -5   1  301.46   12.81
   2  -5  -1  323.02   12.87
   1  -5  -1  642.37   25.50
  -1  -5   1  632.17   25.49
   0  -5  -1 1465.93   57.51
   0  -5   1 1452.37   57.55
  -1  -5  -1  172.96    7.38
  -2  -5  -1 1813.29   69.11
  -2  -5  -1 1762.07   68.67
  -2   5  -1 1740.11   68.66
  -3  -5  -1  876.33   34.74
   3  -5   1  910.50   35.22
  -3   5  -1  854.14   34.73
  -3  -5  -1  946.51   35.08
  -4   5  -1   26.51    1.71
   4  -5   1   34.41    2.32
  -4  -5  -1   37.54    2.09
  -4  -5  -1   30.25    1.80
  -5  -5  -1  376.51   14.56
  -5   5  -1  339.71   14.44
  -5  -5  -1  351.87   14.44
   5  -5   1  362.27   14.73
  -6  -5  -1 1391.23   54.88
   6  -5   1 1369.59   55.05
  -6  -5  -1 1426.37   54.89
  -6   5  -1 1371.75   54.89
  -7  -5  -1   60.36    3.06
  -7  -5  -1   61.75    3.24
  -7   5  -1   48.74    3.20
   7  -5   1   50.38    3.17
  -8  -5  -1 1727.00   66.88
   8  -5   1 1682.69   66.80
  -8   5  -1 1661.35   66.84
  -8  -5  -1 1695.02   66.66
  -9  -5  -1  406.07   15.98
   9  -5   1  362.39   15.72
  -9  -5  -1  390.63   15.62
  -9   5  -1  366.76   15.93
 -10  -5  -1  166.14    7.60
 -10   5  -1  161.15    7.60
  10  -5   1  162.28    7.29
  11  -5   1  303.70   12.90
 -11   5  -1  300.42   13.29
 -11  -5  -1  325.25   13.37
 -12  -5  -1  899.59   34.36
  12  -5   1  821.74   33.80
 -12   5  -1  834.42   34.26
 -13   5  -1    1.68    1.87
  13  -5   1    3.66    1.13
 -13  -5  -1    4.67    1.99
 -14  -5  -1 1555.70   60.06
 -14   5  -1 1450.55   59.94
 -15  -5  -1  196.30    8.90
 -15   5  -1  173.40    8.72
  16   5   1  186.88    8.94
 -16   5  -1  154.41    8.15
 -16  -5  -1  174.17    8.70
 -16  -5  -1  167.89    8.29
  17  -5   1   20.41    2.75
  17   5   1   19.62    2.52
  17   5   1   17.98    2.73
 -17  -5  -1   19.45    3.03
 -17   5  -1   19.49    2.67
 -17  -5  -1   20.76    2.72
  17   5   1   28.04    3.78
  18  -5   1  447.70   19.78
  18   5   1  454.44   20.02
  18   5   1  471.50   20.20
 -18  -5  -1  506.20   20.38
 -18  -5  -1  484.89   20.66
  18   5   1  513.08   20.95
 -18   5  -1  482.26   20.28
  18  -5   1  465.58   20.15
  19   5   1    4.18    2.13
 -19  -5  -1    2.81    2.14
  19  -5   1    2.81    2.26
 -19   5  -1    2.21    2.08
  19  -5   1    1.96    1.64
  19   5   1    6.63    2.31
 -19  -5  -1    5.64    2.70
 -20  -5  -1 1151.79   45.43
  20  -5   1 1123.64   45.27
  20  -5   1 1072.41   44.80
  20   5   1 1155.86   45.31
 -20   5  -1 1101.76   45.32
  20   5   1 1113.50   45.10
  21   5   1   10.44    2.27
  21   5   1    7.02    2.39
 -21  -5  -1    6.93    2.30
  21  -5   1    7.13    1.83
  21  -5   1    5.98    2.52
 -21   5  -1    7.25    2.18
  22   5   1   95.46    5.28
  22  -5   1   92.78    4.93
  22  -5   1   94.86    5.52
  22   5   1   88.65    5.41
  23   5   1    4.39    2.20
  23  -5   1    1.84    2.13
  23   5   1    0.32    1.80
  24   5   1  167.80    8.01
  24  -5   1  163.09    8.06
  25  -5   1    1.94    1.88
  25  -5   1    2.73    2.05
  25  -5   1    2.62    2.48
  25   5   1    2.80    2.01
  26   5   1  326.64   13.59
  26  -5   1  327.74   13.67
  26  -5   1  296.08   13.40
  26  -5   1  326.33   13.99
  27  -5   1   22.64    2.22
  27  -5   1   21.60    2.55
  27   5   1   22.80    2.18
  28  -5   1  123.19    5.76
  28  -5   1  125.75    6.08
  28   5   1  130.53    5.81
  28   5   1  119.33    5.67
 -29   5  -1    1.08    1.05
  29  -5   1    3.19    1.44
 -29  -5  -1    1.28    1.07
  29   5   1    1.80    1.08
 -29   5  -1    1.00    1.42
 -30   5  -1   12.41    1.38
  30  -5   1   12.61    1.29
  30  -6  -1   65.90    3.53
 -30   6   1   71.12    3.55
  30   6  -1   70.01    3.36
 -29   6   1   42.12    2.71
  29  -6  -1   39.93    2.66
  29   6  -1   38.95    2.34
  29  -6  -1   25.89    1.88
 -29  -6   1   27.70    1.99
 -28   6   1    6.69    1.52
 -28  -6   1    9.38    1.70
 -28   6   1   14.93    2.20
  28  -6  -1   13.35    1.79
  27  -6  -1  252.42   10.46
  27  -6  -1  221.09    9.98
  27  -6  -1  250.28    9.94
  26  -6  -1   43.13    3.67
  26   6  -1   43.12    3.04
  26  -6  -1   47.93    3.44
  26  -6  -1   40.60    3.12
  25  -6  -1   44.46    3.38
  25   6  -1   47.18    3.36
  25  -6  -1   51.34    4.06
  24   6  -1   -0.65    1.90
  24  -6  -1   -0.30    2.62
  24  -6  -1   -0.11    2.02
  23   6  -1   35.84    3.17
  23  -6  -1   35.59    3.73
  23  -6  -1   34.17    3.14
  22   6  -1   99.32    5.62
  22  -6  -1  102.12    6.20
  22  -6  -1   97.12    5.59
  21  -6  -1   55.06    3.65
  21  -6  -1   48.77    3.75
 -21  -6   1   45.11    3.66
  21   6  -1   46.34    3.70
  20  -6  -1   18.10    2.68
  20   6  -1   19.88    2.73
  20  -6  -1   17.96    2.40
 -20  -6   1   16.26    2.61
  19  -6  -1  105.02    5.82
  19  -6  -1   98.92    5.89
 -19  -6   1  115.06    6.70
  19   6  -1  111.30    5.99
 -19  -6   1  108.42    5.98
 -19   6   1   98.64    5.87
  19   6  -1  126.43    7.00
 -18   6   1   99.25    5.76
  18  -6  -1  100.76    5.77
 -18  -6   1  112.82    5.93
  18   6  -1  112.10    6.73
 -18  -6   1  104.57    6.30
  18  -6  -1  100.57    5.66
  17   6  -1  299.27   13.48
 -17  -6   1  302.66   12.77
 -17   6   1  267.98   12.57
  17  -6  -1  270.27   12.53
  17  -6  -1  280.37   12.57
 -16   6   1   38.34    3.29
 -16  -6   1   43.29    3.38
  16  -6  -1   45.96    2.88
 -15   6   1   21.35    2.50
 -15  -6   1   27.94    2.65
  15  -6  -1   22.97    2.09
  14  -6  -1   52.56    3.08
 -14  -6   1   48.20    3.33
  13  -6  -1  865.72   34.16
 -13  -6   1  855.21   34.27
 -13   6   1  817.38   34.21
  12  -6  -1   16.33    1.95
 -12   6   1   10.71    1.91
 -12  -6   1   14.35    1.99
  11  -6  -1 1785.54   68.59
 -11  -6   1 1737.57   68.44
 -11   6   1 1675.94   68.40
 -10  -6   1  414.13   17.09
 -10   6   1  395.13   17.03
  10  -6  -1  430.64   17.37
 -10  -6   1  431.40   17.32
   9  -6  -1   78.09    4.37
  -9  -6   1   89.29    4.36
  -9  -6   1   79.02    3.93
  -9   6   1   74.73    3.87
   8  -6  -1  732.44   28.92
  -8  -6   1  727.32   28.44
  -8   6   1  674.84   28.35
  -8  -6   1  747.46   28.82
  -7  -6   1 3078.89  116.38
  -7   6   1 2844.58  115.87
  -7  -6   1 3067.48  115.92
   7  -6  -1 2883.90  116.44
  -6  -6   1  250.69    9.85
  -6  -6   1  247.73   10.42
   6  -6  -1  242.03   10.52
  -6   6   1  234.13    9.80
   5  -6  -1 3111.85  121.75
  -5   6   1 3011.04  121.02
  -5  -6   1 3192.99  121.04
  -5  -6   1 3089.16  121.63
  -4  -6   1 1181.12   44.19
  -4   6   1 1082.38   44.16
  -4  -6   1 1157.75   44.87
  -3  -6   1  105.77    5.10
   2  -6  -1 2693.55  104.53
  -2  -6   1 2627.93  104.47
   1  -6  -1 3156.49  121.30
  -1  -6   1 3025.67  121.29
   0  -6  -1  103.61    4.66
   0  -6   1   82.64    4.57
  -1  -6  -1 2911.11  114.25
  -2  -6  -1 2379.30   93.50
   3  -6   1   17.00    2.09
  -3  -6  -1   18.63    0.95
  -3  -6  -1   20.94    1.85
   4  -6   1  622.73   23.55
  -4  -6  -1  584.13   22.78
  -4  -6  -1  589.23   23.25
  -4   6  -1  554.53   22.75
   5  -6   1  790.59   30.50
  -5   6  -1  716.88   29.85
  -5  -6  -1  812.49   30.28
  -5  -6  -1  753.59   29.89
  -6  -6  -1  532.10   21.17
  -6  -6  -1  533.39   20.92
  -6   6  -1  505.81   20.88
   6  -6   1  516.37   21.38
  -7  -6  -1  709.70   28.56
  -7   6  -1  660.65   28.51
  -7  -6  -1  769.07   28.74
   7  -6   1  747.99   28.97
  -8   6  -1  996.36   41.87
  -8  -6  -1 1073.63   41.94
  -8  -6  -1 1102.14   41.98
   8  -6   1 1049.99   42.14
  -9  -6  -1  103.35    4.90
  -9  -6  -1  105.06    5.04
   9  -6   1   97.39    5.04
  -9   6  -1   97.08    4.99
  10  -6   1  213.34    9.52
 -10  -6  -1  220.57    9.39
 -10  -6  -1  228.42    9.64
 -10   6  -1  205.82    9.55
 -11   6  -1   30.16    2.67
 -11  -6  -1   34.16    2.74
  11  -6   1   36.97    2.64
 -12   6  -1   15.36    2.21
 -12  -6  -1   19.16    2.27
  12  -6   1   14.23    1.76
 -13   6  -1  295.60   13.63
  13  -6   1  314.49   13.32
 -13  -6  -1  341.23   13.81
 -14   6  -1   16.14    2.29
 -14  -6  -1   16.48    2.34
  15   6   1  114.92    6.61
 -15   6  -1   96.78    5.62
 -15  -6  -1  112.46    5.76
 -15  -6  -1   98.37    6.22
  16   6   1   66.82    4.16
 -16  -6  -1   72.79    4.33
  16   6   1   71.56    4.97
  16  -6   1   61.56    4.16
 -16  -6  -1   65.11    4.80
 -16   6  -1   54.48    4.03
 -17  -6  -1   11.07    2.27
 -17  -6  -1   12.98    2.96
  17   6   1    9.50    3.45
 -17   6  -1   13.47    2.20
  17  -6   1   11.51    2.36
  17   6   1    6.30    2.11
  18   6   1  236.71   10.77
 -18  -6  -1  211.08   10.44
  18   6   1  207.30    9.75
 -18  -6  -1  223.93    9.95
 -18   6  -1  195.19    9.70
  18  -6   1  203.34    9.73
  18   6   1  194.13    9.60
 -19  -6  -1   91.52    5.97
  19   6   1   82.83    5.17
 -19   6  -1   77.26    5.01
  19   6   1   85.87    5.04
  19  -6   1   84.22    5.18
  19   6   1  102.02    6.23
 -19  -6  -1   95.97    5.30
  20   6   1  122.42    6.48
  20  -6   1  125.76    6.55
  20   6   1  119.52    6.30
 -20  -6  -1  117.83    6.48
  20   6   1  127.60    7.32
  21   6   1    5.85    2.26
  21   6   1    6.33    2.03
  21  -6   1    3.92    2.24
  21   6   1    8.29    3.16
  22   6   1  239.94   10.75
  22   6   1  227.01   10.54
  22  -6   1  239.54   10.81
  23  -6   1   90.75    5.69
  23   6   1  100.31    5.25
  23   6   1  104.14    5.47
  23  -6   1   99.68    5.50
  24   6   1  918.88   36.83
  24  -6   1  949.63   36.96
  24  -6   1  862.94   37.01
  25   6   1   -0.17    1.66
  25  -6   1    3.90    1.93
  25  -6   1   -1.57    1.93
  26   6   1   53.01    3.18
  26  -6   1   54.34    3.32
  26  -6   1   47.72    3.18
  27   6   1   64.54    3.40
  27  -6   1   67.63    3.53
  27  -6   1   58.20    3.91
 -28  -6  -1  224.34   10.41
  28   6   1  286.51   10.73
 -28   6  -1  238.63   10.78
  28  -6   1  275.54   10.93
 -29   6  -1   30.38    2.14
  29  -6   1   29.80    2.17
  29   6   1   31.61    1.92
  30  -7  -1   18.55    1.49
 -30   7   1   15.09    1.35
  30   7  -1   20.12    1.36
 -29   7   1  242.69   10.58
  29  -7  -1  260.50   10.71
  28  -7  -1   29.72    2.60
  28  -7  -1   25.04    2.12
 -28   7   1   28.23    2.49
 -27   7   1   10.35    2.09
  27  -7  -1    6.07    1.82
 -27  -7   1    6.76    1.45
  27  -7  -1    8.78    2.18
  26  -7  -1   44.89    3.33
 -26  -7   1   35.23    2.77
  26  -7  -1   39.23    3.47
  25  -7  -1   91.30    5.55
  25  -7  -1  106.72    5.85
  25  -7  -1   95.63    5.04
  24  -7  -1   41.19    3.90
  24  -7  -1   40.48    3.11
  24  -7  -1   46.73    3.89
  23  -7  -1  127.57    7.10
  23  -7  -1  123.93    6.40
  22  -7  -1   12.98    3.18
  22  -7  -1   15.26    2.37
  21  -7  -1   28.41    2.97
  21  -7  -1   41.86    4.12
  20  -7  -1  165.16    8.71
  20  -7  -1  153.60    7.74
  19  -7  -1   49.40    3.69
 -19  -7   1   50.79    3.70
  19  -7  -1   47.73    4.49
  18  -7  -1   19.82    3.47
  18  -7  -1   15.98    2.48
 -18  -7   1   12.33    2.30
  17  -7  -1   10.44    2.92
 -17  -7   1    7.72    1.95
  17   7  -1   12.11    3.48
  16   7  -1   49.96    4.60
 -16  -7   1   49.46    3.40
  16  -7  -1   40.89    4.19
  15   7  -1  837.69   34.54
  15  -7  -1  860.93   34.59
 -15  -7   1  838.18   33.79
 -15  -7   1  820.20   34.45
  15  -7  -1  809.60   33.63
  14  -7  -1   50.86    3.21
 -14  -7   1   45.11    3.18
 -13  -7   1  751.67   30.76
  13  -7  -1  768.63   30.94
 -12  -7   1  296.73   12.84
  12  -7  -1  310.83   13.16
  11  -7  -1  129.98    6.12
 -11  -7   1  114.09    5.60
  10  -7  -1  113.20    5.71
 -10  -7   1  116.11    5.66
 -10  -7   1  108.13    5.15
   9  -7  -1 2250.43   90.34
  -9  -7   1 2418.58   90.29
  -9  -7   1 2235.04   89.71
   8  -7  -1  337.69   15.10
  -8  -7   1  371.63   15.06
  -8  -7   1  356.14   14.38
  -7  -7   1 1473.22   58.93
  -7  -7   1 1489.34   58.23
   7  -7  -1 1477.06   59.06
   6  -7  -1 1200.71   46.94
  -6  -7   1 1207.04   46.80
  -6  -7   1 1160.20   46.00
  -5  -7   1  300.55   12.61
   5  -7  -1  289.77   12.73
  -4  -7   1  479.31   19.69
  -3  -7   1 2469.99   97.27
   2  -7  -1 1288.98   50.75
  -2  -7   1 1262.56   50.70
  -1  -7   1  580.89   23.68
   1  -7  -1  581.63   23.68
   0  -7  -1 2917.95  113.92
   0  -7   1 2875.35  114.00
  -1  -7  -1  428.51   17.68
  -2  -7  -1   84.76    4.49
   3  -7   1 1013.99   40.11
  -3  -7  -1  987.02   39.85
   4  -7   1  926.85   36.27
  -4  -7  -1  878.02   35.94
   5  -7   1  214.34    9.30
  -5  -7  -1  202.85    8.93
  -5  -7  -1  200.57    8.18
  -6  -7  -1 1671.87   65.82
   6  -7   1 1688.52   66.63
  -6  -7  -1 1681.75   66.36
  -7  -7  -1   10.26    1.23
  -7  -7  -1    9.49    1.69
   7  -7   1    7.39    2.01
   8  -7   1   28.91    2.61
  -8  -7  -1   25.67    1.96
  -8  -7  -1   30.14    2.34
   9  -7   1  113.30    5.60
  -9  -7  -1  116.24    5.40
  -9  -7  -1  100.49    5.11
  10  -7   1  501.21   21.45
 -10  -7  -1  532.21   21.22
 -10  -7  -1  519.41   21.30
  11  -7   1  184.03    8.52
 -11  -7  -1  189.49    8.44
  12  -7   1  160.94    7.73
 -12  -7  -1  174.23    7.80
  13  -7   1   52.65    3.34
 -13  -7  -1   62.52    3.68
 -14  -7  -1   74.45    5.22
 -14  -7  -1   77.65    4.50
  14   7   1   80.52    5.35
  14  -7   1   79.28    5.36
 -15  -7  -1    3.48    2.77
  15   7   1    3.56    2.75
 -15  -7  -1    6.17    1.88
 -16  -7  -1   43.66    3.30
  16   7   1   43.46    4.45
 -16  -7  -1   45.06    4.38
 -17  -7  -1   33.82    3.00
  17   7   1   41.05    4.21
  17  -7   1   26.28    2.95
 -17  -7  -1   38.42    4.03
  18  -7   1    3.79    2.16
 -18  -7  -1    5.07    2.00
 -18  -7  -1    2.95    2.88
  18   7   1    6.79    3.27
 -19  -7  -1   51.14    4.55
  19   7   1   45.75    4.60
  19  -7   1   45.66    3.62
  20   7   1  242.01   11.61
  20  -7   1  226.65   10.65
 -20  -7  -1  238.13   11.52
  21  -7   1   25.73    2.75
  21  -7   1   31.76    3.54
  22  -7   1  530.53   21.97
  22  -7   1  498.69   21.33
  23  -7   1    0.20    1.88
  23  -7   1    3.19    2.43
  24  -7   1    2.62    1.75
  24  -7   1    3.58    2.19
  25  -7   1   40.64    2.64
  25  -7   1   27.65    2.75
  26  -7   1  303.09   12.80
 -27   7  -1    2.74    1.65
 -28   7  -1  221.20    9.99
  28  -7   1  256.85   10.21
  29  -7   1   55.83    2.78
  29   7   1   60.64    2.65
 -29   8   1    1.43    0.95
  29  -8  -1    3.02    1.19
  28  -8  -1   17.39    1.70
  28  -8  -1   22.35    2.16
 -28   8   1   19.58    1.90
  27  -8  -1   92.43    4.77
 -27   8   1   82.34    4.51
  27  -8  -1   84.01    4.48
  26  -8  -1   42.63    3.27
 -26   8   1   39.42    3.23
  26  -8  -1   45.39    3.41
  25  -8  -1  254.61   11.43
 -25   8   1  243.06   11.32
  25  -8  -1  257.93   11.54
 -24   8   1   28.84    3.03
  24  -8  -1   22.83    3.09
  24  -8  -1   23.56    3.28
  23  -8  -1   62.69    4.77
  23  -8  -1   68.21    4.85
  22  -8  -1   28.52    3.63
  22  -8  -1   27.17    3.59
  21  -8  -1  266.13   12.78
  20  -8  -1   50.09    4.62
  19  -8  -1  666.03   28.43
  18  -8  -1   39.12    4.27
  17  -8  -1   73.51    5.60
 -17  -8   1   76.98    5.41
  16  -8  -1    4.88    3.07
 -16  -8   1    0.51    2.63
  15  -8  -1  148.05    8.16
  15  -8  -1  147.51    7.12
 -15  -8   1  138.59    7.85
 -14  -8   1    3.17    2.57
  14  -8  -1    0.98    2.42
  14  -8  -1    4.98    1.72
  13  -8  -1  997.36   41.01
 -13  -8   1  971.08   41.44
  13  -8  -1 1084.45   41.67
  12  -8  -1   69.59    4.24
  11  -8  -1  225.63   10.34
 -10  -8   1  168.14    8.01
  10  -8  -1  170.59    8.14
   9  -8  -1  214.42   10.01
  -9  -8   1  221.93    9.87
  -8  -8   1   24.61    2.39
   8  -8  -1   26.19    2.64
   7  -8  -1  223.01   10.20
  -7  -8   1  222.50    9.96
  -6  -8   1   27.27    2.60
   6  -8  -1   23.00    2.63
   5  -8  -1  149.99    7.32
  -5  -8   1  149.33    7.10
  -4  -8   1  243.75   10.72
  -3  -8   1   17.66    2.25
   3  -8  -1   15.65    2.31
   2  -8  -1   10.13    2.10
  -2  -8   1    7.31    1.95
  -1  -8   1   25.10    2.80
   1  -8  -1   29.21    2.68
   0  -8   1   23.52    2.68
   0  -8  -1   33.53    2.87
  -1  -8  -1  555.65   22.82
  -2  -8  -1  117.10    5.80
   3  -8   1  740.12   29.72
  -3  -8  -1  713.97   29.40
  -4  -8  -1  277.77   12.20
   4  -8   1  293.19   12.63
  -5  -8  -1   87.59    4.68
   5  -8   1   92.06    5.17
   6  -8   1  138.36    6.89
  -6  -8  -1  132.06    6.41
   7  -8   1  720.59   30.10
  -7  -8  -1  745.13   29.79
  -8  -8  -1  244.88   10.48
   8  -8   1  229.26   10.74
   9  -8   1  275.19   12.24
  -9  -8  -1  275.93   11.96
 -10  -8  -1 1148.46   45.88
  10  -8   1 1141.22   46.11
  11  -8   1    4.83    1.70
  12  -8   1  353.10   15.65
  12  -8   1  387.88   16.41
  13  -8   1  117.35    6.69
  13   8   1  127.30    6.79
  14  -8   1  155.88    8.59
  14   8   1  165.88    8.60
  15  -8   1   68.45    5.34
  15   8   1   80.96    5.47
  16   8   1  846.53   34.07
  16  -8   1  793.79   34.03
 -16  -8  -1  793.06   33.93
  17   8   1   82.86    5.90
  17  -8   1   72.04    5.56
 -17  -8  -1   77.35    5.65
  17  -8   1   85.43    5.95
  18   8   1  117.63    7.36
  18  -8   1  127.81    7.51
 -18  -8  -1  126.53    7.54
  18  -8   1  132.46    7.55
  19  -8   1    5.39    3.09
 -19  -8  -1    5.74    3.13
  19  -8   1    4.86    3.10
 -20  -8  -1   95.76    6.09
  20  -8   1   91.67    5.98
  21  -8   1   79.89    5.45
  22  -8   1  327.67   14.74
  23  -8   1  104.89    5.92
  24  -8   1  134.45    6.82
 -25   8  -1    5.34    1.82
  25  -8   1    7.10    1.90
 -26   8  -1    5.21    1.66
  26  -8   1    4.56    1.46
 -27   8  -1    5.63    1.39
 -28   8  -1   44.58    2.65
  28   8   1   75.35    2.98
  28  -9  -1  151.57    6.73
 -27   9   1  149.98    6.95
  27  -9  -1  153.76    7.06
 -26   9   1    1.50    1.56
  26  -9  -1    1.13    1.86
  26  -9  -1    1.37    1.73
 -25   9   1    9.22    2.04
  25  -9  -1    8.16    2.31
  25  -9  -1    5.32    2.31
  24  -9  -1  218.63   10.19
  24  -9  -1  219.75   10.17
 -24   9   1  207.76    9.87
  23  -9  -1  549.47   22.63
  23  -9  -1  556.40   22.61
 -23   9   1  492.29   22.20
  22  -9  -1  180.85    9.03
 -22   9   1  166.55    8.56
  22  -9  -1  169.68    8.93
 -21   9   1  691.44   30.32
  21  -9  -1  744.14   30.70
  21  -9  -1  760.34   30.76
  20  -9  -1    3.46    3.20
  20  -9  -1    2.54    3.21
  19  -9  -1   96.70    6.34
  19  -9  -1   91.38    6.35
 -19  -9   1   85.24    5.85
  18  -9  -1   20.35    3.69
 -18  -9   1   15.60    3.44
  18  -9  -1   19.02    4.06
 -17  -9   1 1162.97   47.05
  17  -9  -1 1129.17   47.28
 -16  -9   1   64.51    5.07
  16  -9  -1   68.71    5.47
 -15  -9   1  353.76   16.73
  15  -9  -1  388.58   17.14
  15  -9  -1  375.13   16.11
  14  -9  -1  299.12   12.95
 -14  -9   1  269.89   13.38
  14  -9  -1  294.23   13.71
  13  -9  -1  174.48    8.62
  13  -9  -1  151.25    7.76
 -13  -9   1  149.24    8.29
  12  -9  -1   17.91    3.02
  12  -9  -1   15.47    2.38
 -12  -9   1   14.18    2.88
  11  -9  -1  737.86   30.12
  11  -9  -1  668.66   29.50
  11  -9  -1  749.56   29.87
 -10  -9   1  334.94   14.48
  10  -9  -1  326.34   14.63
  -9  -9   1   27.29    2.59
   9  -9  -1   19.71    2.69
  -8  -9   1  293.24   12.62
   8  -9  -1  275.76   12.79
  -7  -9   1   94.62    5.08
   7  -9  -1   88.26    5.27
   6  -9  -1   57.28    4.03
  -6  -9   1   58.20    3.78
  -5  -9   1  133.32    6.55
   5  -9  -1  126.43    6.74
  -4  -9   1  207.62    9.54
   3  -9  -1   69.49    4.40
  -3  -9   1   71.37    4.38
  -2  -9   1   10.11    2.16
   2  -9  -1   11.21    2.17
   1  -9  -1  420.43   17.63
  -1  -9   1  408.78   17.62
   0  -9  -1   46.34    3.46
   0  -9   1   52.65    3.75
  -1  -9  -1  793.88   32.33
  -2  -9  -1  380.73   16.20
  -3  -9  -1   13.15    2.10
   3  -9   1   14.64    2.50
  -4  -9  -1  281.56   12.39
   4  -9   1  286.54   12.81
  -5  -9  -1 1286.19   50.71
   5  -9   1 1241.34   51.07
   6  -9   1  292.03   12.69
  -6  -9  -1  268.83   12.16
  -7  -9  -1  440.01   18.48
   7  -9   1  439.82   18.90
   8  -9   1 1461.22   58.54
  -8  -9  -1 1454.19   58.15
   9  -9   1   18.08    2.56
  -9  -9  -1   24.43    2.36
 -10  -9  -1  122.59    6.47
 -10  -9  -1  134.02    7.17
  10  -9   1  125.69    6.78
  10  -9   1  148.34    7.21
  11  -9   1  212.81    9.94
 -11  -9  -1  218.63   10.39
 -11  -9  -1  202.74    9.64
  11  -9   1  217.96   10.34
  12  -9   1 1131.83   44.57
  12  -9   1 1116.47   43.69
  12   9   1  985.78   43.84
  12  -9   1 1133.31   44.30
 -12  -9  -1 1040.19   44.11
  13  -9   1  266.07   12.99
  13  -9   1  274.55   12.80
  13   9   1  255.53   12.45
  13  -9   1  266.67   11.86
 -13  -9  -1  260.69   12.62
  14   9   1 1722.31   69.52
  14  -9   1 1703.46   69.71
  14  -9   1 1753.81   69.92
  15   9   1  138.77    7.86
  15  -9   1  130.11    7.91
  15  -9   1  129.73    7.82
  16  -9   1    3.81    3.42
  16  -9   1    3.67    3.18
  17  -9   1    3.28    3.13
  17  -9   1    4.53    3.26
  18  -9   1 1028.97   43.90
  18  -9   1 1078.52   44.00
 -18  -9  -1 1082.00   43.85
 -19  -9  -1  198.72   10.32
  19  -9   1  194.20   10.34
  19  -9   1  217.63   10.55
 -20  -9  -1  524.73   22.28
  20  -9   1  491.36   22.25
  20  -9   1  528.21   22.36
  21  -9   1  394.43   17.77
  21  -9   1  409.02   17.78
  22  -9   1   37.78    3.75
 -22   9  -1   34.34    3.17
  22  -9   1   38.77    3.69
  23  -9   1    3.35    2.34
 -23   9  -1    2.11    1.81
 -24   9  -1  145.43    7.20
  24  -9   1  166.49    7.52
  25  -9   1  262.96   11.09
 -25   9  -1  251.88   10.95
 -26   9  -1   16.78    1.56
  26  -9   1   16.87    1.63
  28   9   1    0.85    0.69
  28 -10  -1   60.86    3.11
  28  10  -1   69.84    3.05
  27 -10  -1   32.45    2.18
  27 -10  -1   24.43    1.85
  26 -10  -1  190.19    7.58
  26 -10  -1  187.15    7.44
 -25  10   1  106.74    5.34
  25 -10  -1  112.13    5.77
  24 -10  -1   56.95    4.01
 -24  10   1   53.64    3.48
  24 -10  -1   60.89    4.07
 -23  10   1   29.01    2.83
  23 -10  -1   38.23    3.50
  23 -10  -1   31.92    3.43
 -22  10   1   61.59    4.22
  22 -10  -1   60.20    4.72
  22 -10  -1   62.93    4.67
  21 -10  -1  143.73    7.52
 -21  10   1  122.63    6.87
  21 -10  -1  121.02    7.31
 -20  10   1  162.72    8.54
  20 -10  -1  166.74    9.10
  20 -10  -1  175.61    9.15
  19 -10  -1  354.26   16.03
 -19 -10   1  342.60   15.64
  19 -10  -1  346.53   15.98
 -19  10   1  335.22   15.45
 -18  10   1   90.98    5.81
 -18 -10   1   91.09    6.03
  18 -10  -1   88.39    6.33
  17 -10  -1    6.55    3.38
 -17 -10   1    7.26    3.36
 -17  10   1   13.05    2.98
  16 -10  -1    4.35    3.19
 -16 -10   1    7.01    3.32
  15 -10  -1  107.45    7.02
 -15 -10   1  101.50    6.50
  15 -10  -1   93.89    5.54
  15 -10  -1  101.19    6.71
  14 -10  -1  144.38    7.97
  14 -10  -1  123.51    8.01
  14 -10  -1  133.24    7.02
 -14 -10   1  133.14    7.69
  13 -10  -1  115.55    7.04
 -13 -10   1   91.96    6.31
  13 -10  -1  113.32    6.68
  13 -10  -1   99.20    5.88
  12 -10  -1  554.39   22.94
  12 -10  -1  548.07   23.30
  12 -10  -1  537.37   22.58
 -12 -10   1  482.63   22.60
  11 -10  -1   44.46    4.64
 -11 -10   1   43.11    3.85
 -11 -10   1   47.73    4.13
  11 -10  -1   50.26    4.25
  11 -10  -1   48.96    3.87
  10 -10  -1    5.03    2.25
 -10 -10   1   12.84    2.78
  10 -10  -1    9.86    3.08
 -10 -10   1   11.61    2.37
  10 -10  -1   10.78    2.64
 -10 -10   1   10.89    2.60
   9 -10  -1    4.61    2.84
   9 -10  -1    3.65    2.20
   9 -10  -1    6.69    2.53
  -9 -10   1    0.39    1.89
   8 -10  -1  162.91    8.57
  -8 -10   1  171.23    8.27
   8 -10  -1  172.92    8.61
  -7 -10   1   10.02    2.01
   7 -10  -1   13.16    2.67
   6 -10  -1  351.21   15.67
  -6 -10   1  354.35   15.35
   5 -10  -1   41.42    3.59
  -5 -10   1   46.21    3.44
  -4 -10   1  248.29   11.33
  -3 -10   1  310.16   13.42
   3 -10  -1  290.34   13.48
   2 -10  -1  176.24    8.35
  -2 -10   1  157.58    8.18
   1 -10  -1   14.89    2.58
  -1 -10   1   17.76    2.74
   0 -10  -1  132.37    7.00
   0 -10   1  137.66    7.19
  -1 -10  -1   39.86    3.31
  -2 -10  -1  391.89   16.87
   3 -10   1  397.15   17.69
  -3 -10  -1  411.40   17.36
  -4 -10  -1  278.15   12.43
   4 -10   1  279.63   12.84
   5 -10   1  335.02   15.08
  -5 -10  -1  335.24   14.58
  -6 -10  -1   26.04    2.58
   6 -10   1   21.18    2.96
   7 -10   1  171.96    8.32
  -7 -10  -1  159.92    7.95
   7 -10   1  174.64    8.67
   7 -10   1  158.87    8.46
   8 -10   1  136.95    7.70
   8 -10   1  144.50    7.58
   8 -10   1  140.71    7.44
  -8 -10  -1  146.91    7.12
  -8 -10  -1  138.79    7.38
   9 -10   1  400.37   17.22
  -9 -10  -1  375.12   17.11
   9 -10   1  377.72   17.10
   9 -10   1  398.40   17.52
  -9 -10  -1  397.64   16.77
  10 -10   1  452.77   18.54
 -10 -10  -1  411.40   18.38
  10 -10   1  411.99   18.17
 -10 -10  -1  402.53   17.80
  11 -10   1  240.58   10.95
 -11 -10  -1  218.33   11.22
  11 -10   1  233.77   11.37
  11 -10   1  231.73   11.16
  12 -10   1  130.38    7.09
  12 -10   1  118.79    6.67
 -12 -10  -1  115.21    7.20
 -13 -10  -1    6.05    3.17
  13 -10   1    5.93    2.02
  13 -10   1    9.05    3.16
  14 -10   1  147.25    8.71
 -14 -10  -1  140.15    8.12
  14 -10   1  143.70    8.33
  15 -10   1  425.52   19.51
 -15 -10  -1  422.09   19.28
  15 -10   1  451.17   19.82
  16 -10   1  440.91   20.27
  16 -10   1  464.40   20.49
  17 -10   1  197.96   10.59
  17 -10   1  211.15   10.87
  18 -10   1   78.24    5.85
  18 -10   1   74.56    5.76
  19 -10   1   23.42    3.70
  19 -10   1   21.18    3.61
  20 -10   1  103.90    6.39
  20 -10   1  101.94    6.40
  21 -10   1   81.95    5.31
  21 -10   1   80.17    5.30
 -21  10  -1   76.26    4.56
  22 -10   1  172.72    8.04
  22 -10   1  167.64    7.99
  23 -10   1  496.16   19.22
  23 -10   1  489.67   19.10
  24 -10   1   14.42    2.31
  24 -10   1   18.56    2.19
  25 -10   1   31.90    2.30
  27  11  -1   20.67    1.27
  27 -11  -1   16.67    1.40
  26 -11  -1   17.01    1.73
  26 -11  -1   12.48    1.51
  25 -11  -1   25.20    2.27
  25 -11  -1   21.47    2.28
  24 -11  -1   43.32    3.16
  24 -11  -1   39.08    3.15
  23 -11  -1    1.79    2.15
  23 -11  -1    4.64    2.40
  22 -11  -1  373.21   16.81
  22 -11  -1  401.69   16.94
  21 -11  -1   31.24    3.64
  21 -11  -1   28.27    3.46
  20 -11  -1  129.58    7.54
  20 -11  -1  133.91    7.48
 -19 -11   1   25.21    3.48
  19 -11  -1   23.91    3.72
  18 -11  -1   35.78    4.33
 -18 -11   1   40.02    4.04
 -17 -11   1  109.26    6.60
  17 -11  -1  100.13    6.90
  16 -11  -1  332.65   14.77
  16 -11  -1  328.42   15.61
  16 -11  -1  323.94   15.79
 -16 -11   1  338.11   15.32
  15 -11  -1   30.83    4.41
 -15 -11   1   27.88    3.82
  15 -11  -1   25.39    3.91
  15 -11  -1   22.90    3.17
 -14 -11   1  229.97   11.27
  14 -11  -1  236.99   11.60
  14 -11  -1  222.93   11.85
  14 -11  -1  221.27   10.76
  13 -11  -1  461.44   19.91
 -13 -11   1  450.67   20.15
  13 -11  -1  449.19   20.34
  13 -11  -1  472.18   20.86
  12 -11  -1   35.97    3.44
  12 -11  -1   36.24    4.55
 -12 -11   1   30.57    3.50
 -12 -11   1   31.70    3.90
  12 -11  -1   39.73    4.04
  11 -11  -1  245.40   11.27
 -11 -11   1  216.48   11.11
 -11 -11   1  233.39   11.14
  11 -11  -1  230.94   11.70
  11 -11  -1  223.51   11.26
 -10 -11   1  238.14   12.02
 -10 -11   1  256.02   11.86
 -10 -11   1  251.29   12.12
  10 -11  -1  261.80   12.61
  10 -11  -1  258.17   12.21
  10 -11  -1  269.06   12.28
   9 -11  -1  444.53   18.58
  -9 -11   1  417.15   18.26
   9 -11  -1  455.52   18.98
  -9 -11   1  382.81   18.32
  -9 -11   1  422.25   18.50
   9 -11  -1  415.79   18.65
  -8 -11   1  133.69    7.11
   8 -11  -1  123.53    7.24
  -8 -11   1  126.06    7.21
   8 -11  -1  134.13    7.13
  -8 -11   1  129.35    6.90
   8 -11  -1  124.67    7.27
  -7 -11   1 1015.20   41.04
  -7 -11   1  940.87   40.86
  -7 -11   1  976.99   41.22
   7 -11  -1 1063.03   41.10
   7 -11  -1 1035.97   41.34
   7 -11  -1 1007.82   41.40
  -6 -11   1  203.53    9.71
   6 -11  -1  193.46   10.02
   6 -11  -1  197.54    9.65
  -6 -11   1  210.80   10.11
   6 -11  -1  202.17    9.96
  -5 -11   1  109.05    6.10
   5 -11  -1  117.05    6.24
   5 -11  -1  105.88    6.47
  -5 -11   1  118.08    6.29
   5 -11  -1  107.74    6.32
  -5 -11   1  112.01    6.46
  -4 -11   1   73.18    5.27
   4 -11  -1   82.42    4.88
   4 -11  -1   81.18    4.96
  -4 -11   1   70.13    4.61
  -4 -11   1   78.08    4.99
   3 -11  -1  587.76   24.80
  -3 -11   1  568.87   24.84
  -3 -11   1  586.58   24.62
  -3 -11   1  585.51   24.33
  -2 -11   1  580.03   23.90
  -2 -11   1  540.57   24.01
   2 -11  -1  562.90   23.88
  -1 -11   1  789.24   33.16
   1 -11  -1  822.13   33.42
   1 -11  -1  802.62   33.14
  -1 -11   1  786.40   33.36
   0 -11  -1  471.38   20.67
   0 -11   1  496.39   20.96
  -1 -11  -1   41.25    3.50
  -1 -11  -1   44.48    3.95
  -2 -11  -1    8.06    2.71
  -2 -11  -1    5.98    2.31
   2 -11   1    4.04    2.98
   2 -11   1    4.10    2.03
   3 -11   1   15.96    3.09
   3 -11   1   10.96    2.42
   3 -11   1   10.18    2.47
   3 -11   1   18.05    3.54
  -3 -11  -1   13.30    2.44
  -3 -11  -1    9.90    2.85
  -4 -11  -1 1270.64   53.75
  -4 -11  -1 1346.67   54.05
   4 -11   1 1397.87   54.09
  -4 -11  -1 1341.42   54.27
   4 -11   1 1404.74   54.60
   4 -11   1 1320.21   54.19
   4 -11   1 1333.24   54.79
   5 -11   1  148.69    8.61
  -5 -11  -1  153.77    8.11
  -5 -11  -1  161.41    7.90
  -5 -11  -1  159.29    7.91
   5 -11   1  161.45    8.34
   5 -11   1  159.37    7.98
   5 -11   1  147.12    8.22
   6 -11   1  261.95   11.76
   6 -11   1  232.14   12.06
  -6 -11  -1  244.85   11.21
   6 -11   1  234.36   11.70
  -6 -11  -1  244.14   11.30
  -6 -11  -1  231.61   11.39
   6 -11   1  245.89   11.37
   7 -11   1  373.65   16.45
   7 -11   1  353.30   16.67
  -7 -11  -1  359.89   15.82
  -7 -11  -1  350.56   15.97
   7 -11   1  364.78   16.40
   7 -11   1  371.50   16.11
  -7 -11  -1  361.84   16.07
   8 -11   1  406.38   18.66
   8 -11   1  408.60   18.17
  -8 -11  -1  416.00   18.09
  -8 -11  -1  432.81   17.92
   8 -11   1  431.29   18.46
  -8 -11  -1  399.48   18.07
   8 -11   1  395.70   18.39
   9 -11   1  220.09   10.27
  -9 -11  -1  196.44    9.63
   9 -11   1  215.49   10.57
  -9 -11  -1  197.91   10.10
   9 -11   1  198.14   10.47
   9 -11   1  220.70   10.31
  -9 -11  -1  184.64    9.78
  10 -11   1  284.40   13.56
 -10 -11  -1  287.67   13.44
  10 -11   1  287.78   13.42
  10 -11   1  284.11   13.77
  10 -11   1  284.52   13.25
 -10 -11  -1  284.64   12.85
  11 -11   1   63.08    4.88
  11 -11   1   57.76    4.25
 -11 -11  -1   55.06    4.72
  11 -11   1   57.38    4.76
  11 -11   1   58.64    5.24
 -12 -11  -1    5.02    3.03
  12 -11   1    3.83    2.67
  12 -11   1    3.69    2.99
  12 -11   1    3.77    2.14
  13 -11   1  778.67   32.71
  13 -11   1  791.65   32.16
 -13 -11  -1  742.59   32.49
 -14 -11  -1   88.08    5.95
  14 -11   1   76.56    5.94
  15 -11   1  168.67    9.45
 -15 -11  -1  164.24    8.86
  15 -11   1  152.46    9.01
 -16 -11  -1    2.83    3.19
  16 -11   1    3.71    3.31
  16 -11   1    3.11    3.29
  17 -11   1   75.19    5.68
 -17 -11  -1   74.15    5.56
  17 -11   1   79.47    6.01
  18 -11   1   44.59    4.42
  18 -11   1   41.38    4.56
  19 -11   1  143.97    7.91
  19 -11   1  142.23    7.95
  20 -11   1   33.28    3.67
  20 -11   1   30.51    3.60
  21 -11   1  184.29    8.80
  21 -11   1  168.45    8.68
  22 -11   1   87.47    5.10
  22 -11   1   87.54    5.12
  23 -11   1   12.52    2.16
  23 -11   1   10.21    2.16
  24 -11   1    0.71    1.55
  24 -11   1    1.18    1.50
  25 -11   1   54.87    2.86
  25 -11   1   39.21    2.40
  25 -12  -1   33.39    2.28
  25 -12  -1   41.89    2.42
  24 -12  -1  153.41    7.02
  24 -12  -1  151.66    7.02
  23 -12  -1   25.12    2.54
  23 -12  -1   22.87    2.56
  22 -12  -1    0.65    2.12
  22 -12  -1    0.79    2.23
  21 -12  -1   44.55    3.94
  21 -12  -1   49.27    3.89
  20 -12  -1  278.96   12.86
  19 -12  -1  149.69    8.18
 -18 -12   1  238.24   11.31
  18 -12  -1  237.57   11.66
  17 -12  -1   58.46    5.23
  17 -12  -1   62.01    5.11
 -17 -12   1   61.01    4.75
  16 -12  -1    1.51    2.15
  16 -12  -1    3.44    3.16
  16 -12  -1    5.87    3.69
 -16 -12   1    2.77    2.80
  15 -12  -1  529.63   23.22
 -15 -12   1  512.07   22.84
  15 -12  -1  545.97   23.60
  15 -12  -1  534.07   22.68
 -14 -12   1  347.83   16.32
  14 -12  -1  363.99   17.08
  14 -12  -1  375.05   16.34
  14 -12  -1  350.91   16.60
  13 -12  -1   31.21    4.15
  13 -12  -1   24.95    3.08
  13 -12  -1   34.01    3.74
 -13 -12   1   24.83    3.64
  13 -12  -1   22.33    4.46
  12 -12  -1  337.45   14.95
 -12 -12   1  302.95   14.38
  12 -12  -1  328.16   14.83
 -12 -12   1  294.79   14.50
  12 -12  -1  322.43   14.56
  12 -12  -1  303.01   15.09
  11 -12  -1  586.98   23.98
 -11 -12   1  494.93   23.58
 -11 -12   1  556.38   23.72
  11 -12  -1  594.64   24.46
  11 -12  -1  540.62   23.82
 -10 -12   1    7.79    3.17
  10 -12  -1   11.56    3.18
 -10 -12   1   11.49    2.90
  10 -12  -1   10.25    3.59
  10 -12  -1   11.77    2.88
 -10 -12   1   11.55    2.45
   9 -12  -1  620.91   25.59
   9 -12  -1  600.22   25.86
  -9 -12   1  598.37   25.40
  -9 -12   1  610.04   25.72
   9 -12  -1  593.10   25.81
  -9 -12   1  572.57   25.45
   8 -12  -1   94.34    6.12
   8 -12  -1   96.96    5.93
  -8 -12   1   91.57    6.09
   8 -12  -1   89.05    6.09
  -8 -12   1   94.83    5.79
  -8 -12   1   90.27    5.85
  -7 -12   1   30.83    3.93
  -7 -12   1   27.22    3.39
   7 -12  -1   38.05    3.70
  -7 -12   1   26.90    3.36
   7 -12  -1   31.10    3.78
   6 -12  -1  431.13   18.97
  -6 -12   1  421.11   18.66
   6 -12  -1  433.72   18.75
  -6 -12   1  438.54   18.84
  -6 -12   1  430.10   19.09
   6 -12  -1  419.29   19.15
  -5 -12   1  667.23   27.99
  -5 -12   1  624.49   27.31
   5 -12  -1  683.01   27.74
   5 -12  -1  658.11   28.33
   5 -12  -1  630.90   27.89
  -5 -12   1  642.67   27.61
   5 -12  -1  697.67   27.59
  -5 -12   1  643.97   27.32
  -4 -12   1  562.82   25.00
   4 -12  -1  626.29   25.28
  -4 -12   1  591.88   25.72
   4 -12  -1  631.92   25.48
  -4 -12   1  588.68   25.14
  -4 -12   1  597.46   25.43
   3 -12  -1  306.45   13.27
  -3 -12   1  299.84   13.51
   3 -12  -1  277.34   13.89
  -3 -12   1  281.84   12.98
  -3 -12   1  281.10   13.09
  -3 -12   1  285.98   13.71
   3 -12  -1  291.58   13.31
   3 -12  -1  295.55   13.66
  -2 -12   1   12.24    2.79
  -2 -12   1   17.02    3.51
  -2 -12   1   15.54    2.77
   2 -12  -1   19.80    3.32
   2 -12  -1   12.94    2.75
  -2 -12   1   20.52    2.97
   2 -12  -1   18.70    3.77
   2 -12  -1   16.56    2.78
   1 -12  -1   17.10    3.38
   1 -12  -1   25.67    3.04
  -1 -12   1   24.38    3.09
  -1 -12   1   18.93    3.18
   1 -12  -1   18.94    2.94
  -1 -12   1   20.97    3.11
   1 -12  -1   24.14    3.03
  -1 -12   1   20.50    3.56
   0 -12  -1  965.73   39.58
   0 -12   1  927.82   38.90
   0 -12   1  950.60   39.75
   0 -12  -1  981.28   39.33
   0 -12   1  953.25   39.45
   0 -12   1  959.25   39.09
   0 -12  -1  928.29   38.82
   0 -12  -1  960.91   38.91
  -1 -12  -1   54.05    4.08
   1 -12   1   49.11    4.24
   1 -12   1   47.64    4.01
  -1 -12  -1   48.66    4.20
  -1 -12  -1   56.25    4.06
  -1 -12  -1   50.30    4.71
  -2 -12  -1 1092.12   45.00
  -2 -12  -1 1117.47   45.41
   2 -12   1 1151.75   45.28
  -2 -12  -1 1096.06   45.62
  -2 -12  -1 1095.60   45.02
   2 -12   1 1120.21   45.44
   3 -12   1   70.15    5.10
  -3 -12  -1   76.62    4.71
  -3 -12  -1   67.78    5.08
   3 -12   1   69.42    5.16
  -3 -12  -1   66.40    4.61
   3 -12   1   75.12    5.79
  -3 -12  -1   68.66    4.70
   3 -12   1   71.06    4.95
  -4 -12  -1    1.02    2.75
   4 -12   1    6.94    2.52
  -4 -12  -1    2.21    2.35
   4 -12   1    4.45    2.85
   4 -12   1    4.92    3.39
  -4 -12  -1    4.16    2.42
   4 -12   1    6.51    2.76
   5 -12   1  101.21    6.05
   5 -12   1   95.29    6.42
   5 -12   1  101.34    6.95
  -5 -12  -1  102.50    5.90
  -5 -12  -1  101.92    6.20
   5 -12   1   98.66    6.28
  -5 -12  -1   94.90    5.87
   6 -12   1 1150.65   47.24
   6 -12   1 1133.18   47.41
  -6 -12  -1 1157.95   46.86
  -6 -12  -1 1134.49   46.89
   6 -12   1 1185.73   47.81
   6 -12   1 1173.38   47.02
  -6 -12  -1 1133.48   47.05
  -7 -12  -1    2.81    2.07
   7 -12   1    2.72    2.97
   7 -12   1    1.75    2.67
   7 -12   1    2.99    3.27
   7 -12   1    2.87    2.59
  -7 -12  -1    3.30    2.73
  -7 -12  -1    3.59    2.53
  -8 -12  -1  327.47   15.29
  -8 -12  -1  333.97   15.02
   8 -12   1  320.79   15.48
   8 -12   1  346.89   15.79
   8 -12   1  347.59   15.99
   8 -12   1  359.64   15.48
  -8 -12  -1  326.68   15.23
   9 -12   1  127.12    7.26
  -9 -12  -1  119.01    6.62
  -9 -12  -1  125.69    7.26
  -9 -12  -1  126.38    6.99
   9 -12   1  118.85    7.14
   9 -12   1  132.05    7.69
   9 -12   1  116.55    7.60
 -10 -12  -1  125.50    7.16
 -10 -12  -1  129.96    7.62
  10 -12   1  130.97    7.63
  10 -12   1  131.34    7.38
  10 -12   1  140.36    7.83
  10 -12   1  130.42    8.13
  11 -12   1  321.56   15.25
 -11 -12  -1  309.73   14.71
  11 -12   1  304.98   14.40
  11 -12   1  330.63   14.82
  11 -12   1  313.38   14.80
  12 -12   1  459.68   20.78
  12 -12   1  490.57   20.62
 -12 -12  -1  462.14   20.67
  12 -12   1  457.64   21.19
  13 -12   1    4.89    2.56
 -13 -12  -1    2.01    3.00
  13 -12   1    3.66    3.17
 -14 -12  -1    9.86    3.21
  14 -12   1   11.82    3.48
  15 -12   1  301.69   14.53
 -15 -12  -1  308.38   14.29
 -16 -12  -1  240.81   11.37
  16 -12   1  226.44   11.79
  16 -12   1  226.20   11.56
 -17 -12  -1  231.58   11.16
  17 -12   1  228.69   11.56
  17 -12   1  229.79   11.37
  18 -12   1   11.11    3.21
 -18 -12  -1   17.70    3.06
  18 -12   1   18.15    3.26
  19 -12   1    3.75    2.81
  19 -12   1    1.30    2.62
 -19 -12  -1    1.44    2.44
  20 -12   1  111.41    6.20
  20 -12   1  105.59    6.07
  21 -12   1   94.56    5.46
  21 -12   1  103.67    5.58
  22 -12   1   29.21    2.69
  22 -12   1   27.97    2.72
  23 -12   1  128.66    6.05
  23 -12   1  124.11    5.96
  24 -12   1   25.50    1.87
  24 -12   1   29.63    2.11
  25 -12   1   42.41    2.30
  24 -13  -1   87.39    3.93
  24 -13  -1   73.49    3.84
  23 -13  -1    8.83    1.63
  23 -13  -1   10.68    1.83
  22 -13  -1  295.34   12.88
  22 -13  -1  303.17   12.88
  21 -13  -1    0.62    2.03
  20 -13  -1   68.54    4.55
  19 -13  -1   11.48    2.80
  18 -13  -1   80.50    5.53
 -18 -13   1   73.25    4.89
  18 -13  -1   81.37    5.39
 -17 -13   1    7.43    2.69
  17 -13  -1    5.59    3.38
  17 -13  -1    3.51    2.99
  16 -13  -1  392.35   17.85
  16 -13  -1  402.48   18.13
  16 -13  -1  384.63   17.06
 -16 -13   1  409.92   17.48
  15 -13  -1   16.11    2.79
  15 -13  -1   18.68    3.64
 -15 -13   1   14.93    3.14
  15 -13  -1   15.25    3.88
  14 -13  -1  236.09   12.20
  14 -13  -1  245.82   11.50
 -14 -13   1  226.47   11.38
  14 -13  -1  238.59   11.76
 -13 -13   1   35.71    3.55
  13 -13  -1   37.52    4.80
 -13 -13   1   37.40    4.04
  13 -13  -1   43.82    4.41
  13 -13  -1   33.69    3.92
  12 -13  -1   20.09    3.69
 -12 -13   1   18.95    3.47
 -12 -13   1   16.40    3.09
  12 -13  -1   20.90    3.54
  12 -13  -1   18.64    4.06
  11 -13  -1   30.18    4.33
 -11 -13   1   28.49    3.78
  11 -13  -1   36.09    4.28
  11 -13  -1   23.76    3.83
 -11 -13   1   33.06    3.86
  10 -13  -1  652.15   27.41
 -10 -13   1  594.00   26.64
  10 -13  -1  614.47   26.95
  10 -13  -1  637.23   27.23
  10 -13  -1  636.03   26.80
 -10 -13   1  633.85   26.83
   9 -13  -1   10.33    3.18
  -9 -13   1    5.60    2.23
   9 -13  -1    9.02    3.48
   9 -13  -1    3.74    2.82
   9 -13  -1   12.04    3.96
  -9 -13   1    3.26    2.80
  -9 -13   1    2.93    2.85
   8 -13  -1  469.68   21.17
   8 -13  -1  477.07   21.36
  -8 -13   1  489.04   21.15
  -8 -13   1  451.14   20.76
   8 -13  -1  493.44   20.96
   8 -13  -1  505.35   21.85
  -8 -13   1  470.54   20.78
  -7 -13   1   81.09    5.87
  -7 -13   1   77.08    5.57
   7 -13  -1   93.24    5.83
   7 -13  -1   93.31    6.71
   7 -13  -1   91.76    6.11
  -7 -13   1   84.43    5.49
   7 -13  -1   77.45    5.87
  -6 -13   1   13.69    3.55
   6 -13  -1   13.96    3.07
   6 -13  -1    7.64    3.84
  -6 -13   1   10.75    2.88
  -6 -13   1   13.37    3.00
   6 -13  -1    6.52    3.07
   6 -13  -1   15.60    3.30
  -5 -13   1  280.84   12.83
   5 -13  -1  259.05   13.52
  -5 -13   1  259.81   12.50
  -5 -13   1  277.81   13.16
   5 -13  -1  255.32   12.76
   5 -13  -1  272.17   12.68
   5 -13  -1  271.85   13.18
   4 -13  -1  482.52   20.53
  -4 -13   1  464.08   20.49
   4 -13  -1  471.13   20.33
  -4 -13   1  454.71   20.12
  -4 -13   1  462.15   20.81
  -4 -13   1  464.31   20.14
   3 -13  -1   15.92    4.03
   3 -13  -1   20.67    3.54
  -3 -13   1   22.47    3.17
  -3 -13   1   21.67    3.81
   3 -13  -1   13.69    3.00
  -3 -13   1   21.04    3.00
  -3 -13   1   16.12    3.20
   3 -13  -1   17.86    3.35
   2 -13  -1  288.37   13.24
  -2 -13   1  287.69   13.79
  -2 -13   1  282.18   13.39
   2 -13  -1  285.30   13.13
   2 -13  -1  285.13   13.94
  -2 -13   1  275.19   13.06
   2 -13  -1  271.96   13.48
  -1 -13   1  319.01   15.32
   1 -13  -1  320.20   14.45
  -1 -13   1  319.40   14.92
  -1 -13   1  320.68   14.53
   1 -13  -1  305.96   14.76
  -1 -13   1  314.74   14.60
   1 -13  -1  331.40   15.29
   1 -13  -1  317.81   14.53
   0 -13  -1   31.91    3.76
   0 -13  -1   27.39    3.43
   0 -13  -1   28.28    4.27
   0 -13   1   27.92    3.72
   0 -13   1   38.49    3.82
   0 -13   1   24.94    3.70
   0 -13  -1   26.57    3.19
   0 -13   1   29.18    4.22
   0 -13  -1   29.09    3.42
  -1 -13  -1  688.01   28.07
   1 -13   1  667.01   27.78
   1 -13   1  621.36   27.80
  -1 -13  -1  641.53   27.54
  -1 -13  -1  669.65   27.52
  -1 -13  -1  662.00   28.28
   2 -13   1  185.36    9.36
  -2 -13  -1  182.03    9.40
  -2 -13  -1  189.36    9.85
  -2 -13  -1  179.70    9.08
   2 -13   1  175.77    9.48
  -2 -13  -1  188.87    9.19
  -3 -13  -1   79.07    5.68
   3 -13   1   74.06    5.73
  -3 -13  -1   82.96    5.35
  -3 -13  -1   74.79    5.03
   3 -13   1   72.68    5.55
   3 -13   1   71.43    6.28
  -3 -13  -1   76.17    5.11
   3 -13   1   76.33    5.31
  -4 -13  -1   67.18    5.02
   4 -13   1   64.78    5.83
  -4 -13  -1   73.20    5.00
  -4 -13  -1   73.10    5.52
   4 -13   1   66.84    5.31
   4 -13   1   75.41    5.48
   4 -13   1   78.54    5.37
  -5 -13  -1  331.73   15.23
   5 -13   1  323.01   15.90
   5 -13   1  337.69   15.13
  -5 -13  -1  331.42   14.94
   5 -13   1  315.34   15.46
  -5 -13  -1  327.98   14.89
   5 -13   1  319.23   15.25
   6 -13   1    5.30    2.72
  -6 -13  -1    4.40    2.80
  -6 -13  -1    2.62    2.19
   6 -13   1    6.53    3.08
  -6 -13  -1    6.28    2.94
   6 -13   1    4.40    3.50
   6 -13   1    4.11    3.14
  -7 -13  -1  424.75   18.66
   7 -13   1  430.60   19.66
  -7 -13  -1  426.04   18.94
  -7 -13  -1  424.81   18.87
   7 -13   1  451.93   19.01
   7 -13   1  401.97   19.13
   7 -13   1  422.00   19.24
   8 -13   1   22.56    4.05
  -8 -13  -1   25.21    3.02
   8 -13   1   29.40    3.71
   8 -13   1   28.64    3.73
   8 -13   1   30.04    4.15
  -8 -13  -1   27.42    3.69
  -8 -13  -1   26.14    3.58
   9 -13   1  121.01    7.12
   9 -13   1  117.98    7.07
   9 -13   1  122.88    7.47
   9 -13   1  113.20    7.49
  -9 -13  -1  116.60    7.02
  -9 -13  -1  113.91    6.79
 -10 -13  -1  114.43    7.34
  10 -13   1  130.86    8.06
  10 -13   1  140.04    7.81
 -10 -13  -1  117.46    6.99
  10 -13   1  136.18    7.59
  11 -13   1   58.20    5.03
 -11 -13  -1   57.79    5.05
  11 -13   1   52.32    5.45
  11 -13   1   67.93    5.08
  12 -13   1   51.46    5.23
  12 -13   1   50.02    4.66
 -12 -13  -1   38.66    4.30
  12 -13   1   47.78    4.17
  13 -13   1  429.14   18.51
  13 -13   1  412.23   19.36
  13 -13   1  425.79   19.03
 -13 -13  -1  419.74   18.83
 -14 -13  -1   20.17    3.63
  14 -13   1   22.55    3.68
  14 -13   1   19.58    2.85
  15 -13   1  307.07   14.58
 -15 -13  -1  316.46   14.38
 -16 -13  -1  101.51    6.09
  16 -13   1   97.58    6.39
  17 -13   1    2.33    2.73
  17 -13   1    1.49    3.07
 -17 -13  -1   -0.68    2.53
  18 -13   1    7.39    2.72
  18 -13   1   12.82    3.07
 -18 -13  -1    9.40    2.62
  19 -13   1  314.02   13.94
  19 -13   1  309.12   13.82
  20 -13   1   31.75    3.01
  20 -13   1   33.04    3.18
  21 -13   1  240.43   10.59
  21 -13   1  238.29   10.56
  22 -13   1    8.28    1.69
  22 -13   1    5.86    1.67
  23 -13   1   16.55    1.62
  23 -13   1   13.96    1.45
  23 -14  -1   40.76    2.28
  23 -14  -1   38.57    2.22
  22 -14  -1   64.55    3.47
  22 -14  -1   65.37    3.57
  21 -14  -1   17.06    2.07
 -21  14   1    7.59    1.05
  20 -14  -1  201.19    9.20
  19 -14  -1   56.81    4.10
  19 -14  -1   55.76    3.95
  18 -14  -1  145.79    7.45
  18 -14  -1  134.82    7.40
  17 -14  -1   -1.88    2.62
  17 -14  -1   -1.25    2.81
 -16 -14   1    1.62    2.22
  16 -14  -1    0.47    2.75
  16 -14  -1    1.26    1.78
  16 -14  -1    4.13    3.09
  15 -14  -1   64.62    5.08
  15 -14  -1   60.90    5.27
  15 -14  -1   59.04    4.30
 -15 -14   1   74.57    4.68
  14 -14  -1  306.73   14.33
  14 -14  -1  300.44   13.93
 -14 -14   1  309.28   13.96
  14 -14  -1  315.14   14.78
  13 -14  -1    1.19    2.65
  13 -14  -1    2.84    3.43
 -13 -14   1    1.37    2.66
 -13 -14   1    4.42    2.39
  13 -14  -1    2.48    3.03
 -12 -14   1  430.11   19.53
  12 -14  -1  457.59   19.96
  12 -14  -1  444.56   20.32
  12 -14  -1  471.44   20.13
 -12 -14   1  452.17   19.71
  11 -14  -1  225.25   11.05
  11 -14  -1  214.82   10.61
 -11 -14   1  201.66   10.34
  11 -14  -1  191.22   10.81
 -11 -14   1  205.29   10.35
 -10 -14   1   25.64    3.75
  10 -14  -1   21.04    3.54
  10 -14  -1   23.42    4.12
 -10 -14   1   26.38    3.59
  10 -14  -1   32.78    4.39
  -9 -14   1    7.92    3.18
  -9 -14   1    8.89    3.38
   9 -14  -1    5.97    2.91
   9 -14  -1    6.92    3.58
   9 -14  -1    8.27    3.93
   8 -14  -1  881.84   36.74
  -8 -14   1  831.32   35.72
   8 -14  -1  843.20   36.10
  -8 -14   1  908.33   36.21
   8 -14  -1  851.65   35.88
  -7 -14   1  341.88   15.97
   7 -14  -1  346.96   16.13
   7 -14  -1  363.72   16.45
  -7 -14   1  354.24   16.48
   7 -14  -1  366.09   17.10
   6 -14  -1  898.92   35.89
  -6 -14   1  844.26   35.91
   6 -14  -1  804.27   36.28
   6 -14  -1  863.87   36.75
  -6 -14   1  885.82   36.31
  -6 -14   1  830.25   35.62
   6 -14  -1  894.85   36.05
  -5 -14   1  205.01   10.28
   5 -14  -1  190.23   10.46
   5 -14  -1  205.14   10.26
  -5 -14   1  202.68   10.69
   5 -14  -1  197.72   10.25
  -5 -14   1  197.28    9.98
   4 -14  -1    5.96    3.00
  -4 -14   1    5.04    2.45
  -4 -14   1    3.42    2.53
  -4 -14   1    3.16    3.25
   4 -14  -1    2.34    2.93
  -3 -14   1  308.07   14.29
  -3 -14   1  312.03   14.97
   3 -14  -1  318.92   14.38
  -3 -14   1  288.76   14.40
   3 -14  -1  303.70   15.19
   3 -14  -1  323.31   14.53
  -2 -14   1  695.70   28.92
   2 -14  -1  705.20   28.93
   2 -14  -1  692.44   29.74
  -2 -14   1  681.35   29.32
   2 -14  -1  659.12   28.45
   2 -14  -1  699.05   28.96
  -2 -14   1  694.41   29.71
   2 -14  -1  655.60   29.29
  -1 -14   1  869.01   36.82
  -1 -14   1  887.61   36.08
   1 -14  -1  840.10   35.63
   1 -14  -1  859.03   36.74
   1 -14  -1  883.48   36.00
   1 -14  -1  890.84   36.03
  -1 -14   1  851.80   36.42
   1 -14  -1  859.53   36.40
   0 -14  -1  297.18   14.57
   0 -14  -1  306.14   14.30
   0 -14  -1  324.91   15.16
   0 -14   1  318.37   14.48
   0 -14   1  318.84   15.37
   0 -14  -1  308.34   14.06
   0 -14   1  309.11   14.88
  -1 -14  -1   10.70    2.99
  -1 -14  -1    8.09    2.67
  -1 -14  -1   10.59    2.73
   1 -14   1    5.28    2.99
   1 -14   1    4.54    3.09
  -1 -14  -1    9.02    3.54
   2 -14   1  118.40    6.85
  -2 -14  -1  114.53    6.61
   2 -14   1  110.54    6.83
  -2 -14  -1  105.59    6.67
  -2 -14  -1  105.03    7.08
  -2 -14  -1  106.45    6.36
   3 -14   1  801.03   35.63
   3 -14   1  880.07   35.27
  -3 -14  -1  828.11   35.21
   3 -14   1  868.55   36.19
   3 -14   1  863.27   35.37
  -3 -14  -1  829.59   34.93
  -3 -14  -1  839.87   35.54
  -4 -14  -1   59.98    4.77
  -4 -14  -1   59.60    4.62
   4 -14   1   56.77    5.06
   4 -14   1   64.22    5.94
   4 -14   1   70.58    5.19
  -4 -14  -1   65.02    5.36
   4 -14   1   63.49    5.21
   5 -14   1  511.39   22.51
  -5 -14  -1  532.26   22.60
   5 -14   1  512.00   23.15
   5 -14   1  482.95   22.67
   5 -14   1  515.87   22.32
  -5 -14  -1  499.81   22.07
  -5 -14  -1  520.01   22.26
   6 -14   1   87.24    5.92
  -6 -14  -1   81.48    5.87
   6 -14   1   85.95    6.25
  -6 -14  -1   82.82    5.72
   6 -14   1   87.24    6.79
   7 -14   1   30.22    4.62
   7 -14   1   23.33    3.63
  -7 -14  -1   28.20    3.68
  -7 -14  -1   20.10    3.44
   7 -14   1   23.40    3.91
   8 -14   1   22.29    3.62
  -8 -14  -1   24.85    3.65
   8 -14   1   32.95    4.53
   8 -14   1   23.12    4.01
  -8 -14  -1   23.43    3.46
   9 -14   1  316.89   14.98
  -9 -14  -1  314.77   14.74
   9 -14   1  337.73   15.47
  -9 -14  -1  315.67   14.88
   9 -14   1  329.50   15.46
 -10 -14  -1   71.93    5.52
  10 -14   1   76.78    5.69
  10 -14   1   85.29    5.98
  10 -14   1   85.86    6.31
 -10 -14  -1   78.58    5.26
 -11 -14  -1  243.66   12.18
  11 -14   1  251.41   12.82
  11 -14   1  268.91   12.40
  11 -14   1  252.46   12.43
  12 -14   1   26.01    3.21
  12 -14   1   26.60    3.98
 -12 -14  -1   18.74    3.47
  12 -14   1   25.69    4.40
  13 -14   1   19.84    3.93
  13 -14   1   19.19    3.70
 -13 -14  -1   15.33    3.27
  13 -14   1   13.60    2.69
 -14 -14  -1   78.66    5.25
  14 -14   1   75.55    5.87
  14 -14   1   75.59    4.70
  14 -14   1   81.98    5.67
 -15 -14  -1   98.75    5.65
  15 -14   1   82.63    5.82
 -16 -14  -1  137.56    7.05
  16 -14   1  129.80    7.30
 -17 -14  -1  360.05   14.93
  17 -14   1  321.50   15.05
  18 -14   1   34.29    3.42
  18 -14   1   37.18    3.34
  19 -14   1   98.60    5.28
  19 -14   1   97.23    5.37
  20 -14   1  106.95    5.57
  20 -14   1  119.14    5.69
  21 -14   1  110.89    5.26
  21 -14   1  110.40    5.27
  22 -14   1    0.38    1.02
  21 -15  -1    1.32    1.06
  20 -15  -1   21.53    2.08
  20 -15  -1   22.09    2.18
  19 -15  -1    6.15    1.97
  19 -15  -1    7.33    1.91
  18 -15  -1   62.89    4.26
  18 -15  -1   69.28    4.21
  17 -15  -1    3.75    2.40
  17 -15  -1    0.76    2.40
  16 -15  -1  229.49   10.99
  16 -15  -1  230.88   10.81
  15 -15  -1    5.12    1.99
 -15 -15   1    1.69    2.10
  15 -15  -1    4.13    3.03
  15 -15  -1    1.15    2.70
  14 -15  -1   61.97    5.17
 -14 -15   1   68.68    4.31
  14 -15  -1   63.03    4.83
  14 -15  -1   61.70    4.33
  13 -15  -1   24.37    3.97
 -13 -15   1   27.57    2.95
 -13 -15   1   22.51    2.74
  13 -15  -1   18.90    3.11
  13 -15  -1   27.33    3.67
 -12 -15   1   33.79    3.38
  12 -15  -1   28.95    3.85
 -12 -15   1   33.03    3.37
  12 -15  -1   25.57    3.65
  12 -15  -1   31.79    4.24
  11 -15  -1   18.27    3.53
  11 -15  -1   17.67    3.38
 -11 -15   1   15.86    3.08
  11 -15  -1   15.50    3.85
 -11 -15   1   15.01    2.82
  10 -15  -1  370.76   17.08
  10 -15  -1  370.68   16.78
 -10 -15   1  370.60   16.69
  10 -15  -1  391.79   17.28
 -10 -15   1  358.13   16.39
  -9 -15   1  137.79    7.87
   9 -15  -1  144.48    8.46
   9 -15  -1  143.68    8.20
  -9 -15   1  132.92    7.45
   9 -15  -1  136.51    7.87
   8 -15  -1  181.11   10.13
   8 -15  -1  183.64    9.74
   8 -15  -1  178.86    9.42
  -8 -15   1  176.89    9.18
  -8 -15   1  182.43    9.64
  -7 -15   1    2.80    2.82
   7 -15  -1    0.55    3.10
   7 -15  -1    2.14    3.74
   7 -15  -1    1.37    2.94
  -7 -15   1    1.17    3.17
   6 -15  -1  126.26    8.46
   6 -15  -1  134.12    7.65
   6 -15  -1  127.77    7.67
  -6 -15   1  144.66    8.10
  -6 -15   1  123.58    7.20
   5 -15  -1  332.96   14.57
  -5 -15   1  313.17   14.98
   5 -15  -1  308.33   14.61
  -5 -15   1  295.46   14.13
  -4 -15   1  351.81   17.34
   4 -15  -1  381.72   16.91
   4 -15  -1  381.71   16.95
   3 -15  -1  170.93    9.91
   3 -15  -1  167.52    9.02
   3 -15  -1  176.05    9.13
  -3 -15   1  167.75    9.66
   2 -15  -1   45.43    4.43
  -2 -15   1   50.27    5.06
   2 -15  -1   46.68    5.12
   2 -15  -1   43.77    3.85
  -1 -15   1   54.22    5.44
   1 -15  -1   42.40    3.85
   1 -15  -1   43.49    4.94
  -1 -15   1   49.66    4.42
   1 -15  -1   43.71    4.34
   0 -15   1   96.61    7.34
   0 -15  -1   91.74    5.98
   0 -15   1  121.84    6.77
   0 -15  -1  106.05    6.47
   0 -15  -1  114.33    7.31
  -1 -15  -1  513.76   22.43
   1 -15   1  511.78   23.60
   1 -15   1  554.32   22.91
  -1 -15  -1  519.82   23.32
  -2 -15  -1  172.08    8.83
   2 -15   1  174.46    9.18
  -2 -15  -1  166.97    9.53
   3 -15   1  146.29    8.17
   3 -15   1  147.39    8.36
  -3 -15  -1  142.70    7.84
   3 -15   1  144.55    9.18
  -3 -15  -1  148.80    8.57
  -4 -15  -1    4.48    2.84
   4 -15   1    3.90    3.32
   4 -15   1    2.44    3.78
   4 -15   1    3.49    3.00
  -4 -15  -1   -0.20    3.18
  -5 -15  -1   59.65    4.76
  -5 -15  -1   57.18    5.00
   5 -15   1   59.55    4.89
   5 -15   1   66.15    5.25
   5 -15   1   57.64    5.76
   6 -15   1   20.80    3.61
  -6 -15  -1   17.23    3.26
   6 -15   1   14.57    4.28
   6 -15   1   21.82    4.06
  -6 -15  -1   18.49    3.60
  -7 -15  -1  296.24   13.99
   7 -15   1  293.12   13.95
  -7 -15  -1  289.09   13.78
   7 -15   1  310.41   14.68
   7 -15   1  301.60   14.30
  -8 -15  -1    4.00    2.83
  -8 -15  -1    1.97    2.81
   8 -15   1    1.28    3.42
   8 -15   1    0.17    3.12
   8 -15   1    1.77    3.45
   9 -15   1  233.21   11.29
   9 -15   1  205.17   11.19
  -9 -15  -1  219.64   10.73
  -9 -15  -1  208.04   10.58
   9 -15   1  225.98   11.06
 -10 -15  -1    1.56    2.70
  10 -15   1    3.55    3.73
  10 -15   1    4.31    2.97
  10 -15   1    0.86    3.17
 -10 -15  -1    2.82    2.51
  11 -15   1   41.07    3.87
  11 -15   1   32.71    4.02
  11 -15   1   35.31    4.47
 -11 -15  -1   28.17    3.54
  12 -15   1    2.31    2.98
  12 -15   1    1.69    3.31
  12 -15   1    4.30    2.47
 -12 -15  -1    0.14    2.49
 -13 -15  -1  256.51   11.63
  13 -15   1  245.91   12.00
  13 -15   1  244.12   11.30
  13 -15   1  260.81   12.35
  14 -15   1    4.74    3.16
  14 -15   1    0.59    2.88
 -14 -15  -1    1.45    2.23
 -15 -15  -1  180.94    8.33
  15 -15   1  157.30    8.56
  15 -15   1  174.25    8.83
 -16 -15  -1   27.56    2.70
  16 -15   1   22.71    3.07
  17 -15   1    8.43    2.24
  18 -15   1   28.34    2.58
  19 -15   1  190.13    8.33
  19 -15   1  185.69    8.35
  20 -15   1   15.52    1.56
  20 -15   1   11.97    1.55
  19 -16  -1   91.03    4.14
  19 -16  -1   82.78    4.21
  18 -16  -1   86.58    4.65
  18 -16  -1   94.35    4.57
  17 -16  -1    1.30    1.95
  17 -16  -1   -0.76    1.67
  16 -16  -1   -0.11    2.23
  16 -16  -1    3.60    2.08
  15 -16  -1  157.36    7.62
  15 -16  -1  169.92    7.51
  14 -16  -1  102.09    6.20
  14 -16  -1   99.76    5.38
  14 -16  -1  116.33    6.11
 -13 -16   1   50.15    3.39
  13 -16  -1   49.11    4.14
  13 -16  -1   60.89    3.89
  13 -16  -1   48.49    4.47
  12 -16  -1   46.82    3.87
 -12 -16   1   45.45    3.26
  12 -16  -1   48.45    4.46
 -12 -16   1   42.17    3.42
  12 -16  -1   49.36    4.22
 -11 -16   1   85.28    4.82
  11 -16  -1   89.32    5.68
  11 -16  -1   87.52    5.62
 -11 -16   1   83.43    5.17
  11 -16  -1   76.43    5.75
  10 -16  -1    4.96    3.26
 -10 -16   1    3.68    2.13
  10 -16  -1    1.69    2.74
 -10 -16   1    1.88    2.62
  10 -16  -1    3.35    3.04
   9 -16  -1  252.71   11.95
   9 -16  -1  275.78   12.59
  -9 -16   1  259.74   12.01
   9 -16  -1  238.32   12.07
  -9 -16   1  234.83   11.25
   8 -16  -1   54.59    5.30
  -8 -16   1   52.74    4.04
  -8 -16   1   56.12    4.81
   8 -16  -1   55.68    4.80
   8 -16  -1   62.12    4.75
  -7 -16   1    3.23    3.09
   7 -16  -1    3.66    2.80
   7 -16  -1    8.52    3.29
   7 -16  -1    6.80    3.68
   6 -16  -1   34.41    3.91
   6 -16  -1   43.27    4.30
  -6 -16   1   37.28    4.48
   6 -16  -1   44.80    5.07
   5 -16  -1  151.96    8.34
  -5 -16   1  149.64    8.67
   5 -16  -1  157.68    8.33
   4 -16  -1   45.07    4.36
  -4 -16   1   53.52    5.08
   3 -16  -1   41.42    5.08
  -3 -16   1   30.93    4.67
   3 -16  -1   39.31    4.00
   2 -16  -1    4.92    2.82
  -2 -16   1    8.38    3.61
   2 -16  -1    4.88    3.85
   1 -16  -1    0.43    3.78
  -1 -16   1    9.71    4.00
   0 -16  -1  256.47   13.03
   0 -16   1  267.91   13.42
   1 -16   1    1.15    2.98
   1 -16   1    2.99    4.07
  -1 -16  -1    0.28    2.52
  -1 -16  -1    6.98    3.63
  -2 -16  -1  177.43    9.39
  -2 -16  -1  185.73   10.16
  -3 -16  -1    2.13    3.17
   3 -16   1    7.29    3.22
  -3 -16  -1    3.21    2.38
  -4 -16  -1   51.46    4.76
   4 -16   1   49.65    4.42
   4 -16   1   49.00    5.50
  -4 -16  -1   43.15    4.00
   5 -16   1   74.41    5.34
  -5 -16  -1   66.14    5.35
   5 -16   1   71.76    6.12
  -5 -16  -1   67.47    4.82
  -6 -16  -1  408.66   17.63
   6 -16   1  407.77   17.50
   6 -16   1  398.04   17.63
  -6 -16  -1  359.12   17.02
   6 -16   1  380.98   18.11
   7 -16   1  121.22    6.85
  -7 -16  -1  102.81    6.27
   7 -16   1  108.80    7.26
   7 -16   1  103.01    6.89
  -7 -16  -1  114.75    6.67
  -8 -16  -1   72.55    4.90
   8 -16   1   73.48    5.66
   8 -16   1   82.15    5.81
   8 -16   1   72.62    5.36
  -8 -16  -1   73.89    5.12
   9 -16   1   56.96    5.07
   9 -16   1   60.05    4.86
   9 -16   1   56.19    4.67
  -9 -16  -1   54.65    4.17
  -9 -16  -1   57.64    4.29
  10 -16   1  175.80    8.78
 -10 -16  -1  160.80    8.30
 -10 -16  -1  168.32    8.22
  10 -16   1  183.66    8.97
  10 -16   1  160.52    9.06
  11 -16   1  193.51    9.89
 -11 -16  -1  189.24    9.08
  11 -16   1  189.11    9.26
  11 -16   1  192.37    9.64
  12 -16   1  210.10   10.06
 -12 -16  -1  225.11   10.15
  12 -16   1  228.41   10.67
  12 -16   1  225.55   10.91
  13 -16   1    7.10    2.69
  13 -16   1    5.28    1.79
  13 -16   1   10.45    3.10
 -13 -16  -1    8.46    2.16
  14 -16   1    7.01    2.74
  14 -16   1    4.40    2.47
 -14 -16  -1   10.70    2.00
  15 -16   1   38.04    3.21
  15 -16   1   33.53    3.29
  16 -16   1  105.56    5.39
  16 -16   1  101.18    5.46
  17 -16   1   69.79    3.86
  18 -16   1   14.56    1.60
  16 -17  -1   46.31    2.78
  15 -17  -1   13.54    1.98
  14 -17  -1    2.95    2.14
  14 -17  -1    3.74    2.05
  13 -17  -1  162.69    7.75
  13 -17  -1  154.88    7.28
  13 -17  -1  166.64    7.97
  12 -17  -1    9.72    2.81
  12 -17  -1    9.22    2.13
  12 -17  -1   10.35    2.51
 -11 -17   1  162.15    7.99
  11 -17  -1  175.74    8.73
  11 -17  -1  176.54    8.49
  11 -17  -1  177.38    8.38
  10 -17  -1   16.08    2.81
  10 -17  -1   10.01    2.81
 -10 -17   1   11.04    2.44
  -9 -17   1   79.40    4.94
   9 -17  -1   71.54    5.15
   9 -17  -1   66.48    4.77
   8 -17  -1    7.30    2.71
   8 -17  -1   11.51    3.34
  -8 -17   1    7.25    2.76
  -7 -17   1  250.79   11.80
   7 -17  -1  239.81   11.49
   7 -17  -1  251.77   12.24
   6 -17  -1    4.73    2.60
   6 -17  -1   -0.20    3.43
  -6 -17   1    6.68    3.07
   5 -17  -1    7.14    2.73
  -5 -17   1    1.89    3.05
  -4 -17   1    2.87    3.17
   4 -17  -1   12.49    2.83
   3 -17  -1   85.73    6.45
  -3 -17   1   83.88    6.10
  -2 -17   1  119.63    7.48
   2 -17  -1  111.91    7.47
  -1 -17   1    8.00    3.64
   1 -17  -1   18.34    3.90
   0 -17  -1  132.61    8.11
   0 -17   1  143.40    8.40
   1 -17   1   26.55    4.31
  -1 -17  -1   29.12    4.12
  -2 -17  -1  112.61    6.93
   3 -17   1    1.76    2.78
  -3 -17  -1    1.55    3.13
   4 -17   1  371.19   16.55
  -4 -17  -1  363.72   15.92
   4 -17   1  383.96   15.79
   5 -17   1   53.19    5.09
   5 -17   1   53.78    4.30
  -5 -17  -1   46.86    3.64
  -5 -17  -1   44.78    4.21
  -6 -17  -1    9.19    2.24
   6 -17   1   10.49    3.00
  -6 -17  -1    7.05    2.80
   6 -17   1    7.51    3.38
  -7 -17  -1    9.52    2.30
  -7 -17  -1    8.14    2.63
   7 -17   1   10.18    3.31
   7 -17   1    7.64    2.81
  -8 -17  -1  258.48   11.83
  -8 -17  -1  243.35   11.45
   8 -17   1  280.10   12.22
   8 -17   1  275.52   12.38
  -9 -17  -1   48.78    3.64
  -9 -17  -1   49.74    3.42
   9 -17   1   50.76    4.12
   9 -17   1   59.76    4.30
  10 -17   1  163.21    7.76
  10 -17   1  161.61    8.00
 -10 -17  -1  148.79    7.23
 -11 -17  -1    8.74    1.79
  11 -17   1    9.35    2.59
  11 -17   1   11.67    2.09
 -12 -17  -1   83.58    4.03
  12 -17   1   89.07    4.84
  13 -17   1   31.37    2.93
  14 -17   1  218.51    9.69
  15 -17   1   15.15    1.87
  16 -17   1    0.81    1.09
  11 -18  -1   -0.22    1.42
 -10 -18   1    1.73    1.51
  10 -18  -1    2.34    1.80
  -9 -18   1    2.18    1.81
   9 -18  -1    2.03    2.18
   8 -18  -1    4.82    2.52
  -8 -18   1    4.10    2.08
   7 -18  -1    2.03    2.72
  -7 -18   1    5.05    2.36
  -6 -18   1   12.83    2.86
   6 -18  -1   13.67    3.27
  -5 -18   1    7.19    2.68
  -4 -18   1    0.15    2.60
   3 -18  -1   -1.89    3.29
  -3 -18   1   -1.55    2.91
   2 -18  -1    2.21    3.07
  -2 -18   1    0.81    3.00
  -1 -18   1    5.54    3.28
   1 -18  -1   13.19    3.41
   0 -18  -1    7.11    3.05
   0 -18   1    6.57    3.31
   1 -18   1    1.76    3.28
  -1 -18  -1    2.65    3.03
  -2 -18  -1    2.38    2.80
  -3 -18  -1    3.82    2.70
  -4 -18  -1   16.38    2.99
   4 -18   1   13.79    3.41
   5 -18   1    7.11    3.07
  -5 -18  -1   17.08    2.84
  -6 -18  -1   -0.68    2.21
   6 -18   1    1.87    2.81
   7 -18   1   -0.13    2.37
  -7 -18  -1    2.68    1.98
   8 -18   1   11.90    2.53
   8 -18   1   12.96    2.36
  -8 -18  -1   10.55    1.86
   9 -18   1    1.30    2.04
   9 -18   1    2.81    1.78
  10 -18   1    4.69    1.40
  10 -18   1    3.20    1.97
  11 -18   1    0.97    1.75
  12 -18   1    5.71    1.59
   8 -19  -1    4.71    1.64
   7 -19  -1  148.18    6.76
  -7 -19   1  129.87    6.32
   6 -19  -1   34.09    3.13
  -6 -19   1   33.19    2.73
  -5 -19   1    0.86    1.91
  -4 -19   1   33.03    3.09
   3 -19  -1  182.98    8.88
  -3 -19   1  176.37    8.59
   2 -19  -1   69.77    4.77
  -2 -19   1   70.17    4.63
  -1 -19   1   17.62    2.90
   1 -19  -1   12.39    2.80
   0 -19  -1   98.43    5.83
   0 -19   1  107.06    6.00
   1 -19   1   27.00    3.40
  -1 -19  -1   36.72    3.42
  -2 -19  -1   10.05    2.47
   3 -19   1   15.53    2.89
  -3 -19  -1   15.09    2.42
  -4 -19  -1  134.21    6.76
   4 -19   1  149.34    7.25
  -5 -19  -1    2.95    1.70
   5 -19   1   -0.41    1.98
   6 -19   1   19.22    2.24
  -6 -19  -1   16.29    1.83
   7 -19   1    1.94    1.42
 -32   0   2  107.24    5.17
 -32   0   2  139.40    5.50
 -31   0   2   35.90    2.57
  31   0  -2   36.21    2.14
 -31   0   2   32.69    2.39
  30   0  -2    8.63    1.98
  30   0  -2   12.61    1.58
  29   0  -2   67.06    3.80
  29   0  -2   68.17    4.14
  28   0  -2   67.02    4.04
  28   0  -2   69.53    4.37
  27   0  -2  100.30    5.74
  27   0  -2  102.56    5.52
  26   0  -2   16.39    2.56
  26   0  -2   16.74    2.78
  25   0  -2    4.65    2.54
  25   0  -2    3.87    2.18
  24   0  -2    4.21    2.37
 -23   0   2  140.78    7.51
  23   0  -2  142.26    7.44
  22   0  -2   90.49    5.57
 -22   0   2   96.17    5.70
 -21   0   2  565.76   23.08
  21   0  -2  519.53   22.80
 -20   0   2   92.44    5.41
  20   0  -2   74.29    4.86
  20   0  -2   84.87    5.08
  19   0  -2  784.20   33.61
 -19   0   2  870.15   33.96
 -18   0   2  210.05   10.04
 -17   0   2   77.46    4.85
 -16   0   2  561.72   23.53
 -15   0   2 2448.56   96.96
 -14   0   2   10.84    2.47
 -13   0   2 1854.62   73.67
 -12   0   2  696.25   28.45
  11   0  -2  423.20   17.31
 -11   0   2  410.54   17.48
  10   0  -2  705.41   27.74
 -10   0   2  668.66   27.84
  -9   0   2 7686.25  300.57
   8   0  -2  197.91    8.36
  -8   0   2  195.24    8.49
  -7   0   2 4280.62  168.45
   7   0  -2 4327.88  168.41
   6   0  -2 1135.40   45.72
  -6   0   2 1189.71   45.77
  -4   0   2   63.30    2.85
  -2   0   2    0.75    0.40
   0   0   2   11.67    0.72
   2   0   2    1.89    0.72
   3   0   2 1621.94   63.56
   4   0   2  385.00   15.46
   5   0   2   44.64    2.48
   6   0   2   15.57    1.53
   7   0   2  285.42   11.77
  -7   0  -2  277.84   11.72
  -8   0  -2  319.95   13.36
  -8   0  -2  320.38   13.40
  -9   0  -2  121.61    5.89
  -9   0  -2  128.21    6.02
 -10   0  -2   14.52    2.06
 -10   0  -2   14.40    2.43
 -11   0  -2   44.62    3.45
 -12   0  -2  209.46    9.53
 -13   0  -2  180.46    8.46
 -14   0  -2    7.32    2.18
 -15   0  -2    6.29    2.06
 -16   0  -2  866.88   35.41
  17   0   2  897.23   35.80
 -17   0  -2  899.77   35.97
  17   0   2  839.71   35.72
  18   0   2  168.45    8.33
  18   0   2  156.48    7.94
  18   0   2  155.31    8.02
 -18   0  -2  163.30    8.20
 -19   0  -2  702.81   29.60
  19   0   2  737.61   29.60
  19   0   2  727.57   29.47
  19   0   2  676.67   29.42
 -20   0  -2 1115.59   44.28
  20   0   2 1046.52   44.06
  20   0   2 1092.92   44.11
  20   0   2 1082.82   44.00
  21   0   2  108.05    6.30
  21   0   2   99.83    6.13
 -21   0  -2  110.46    6.34
  21   0   2  114.27    6.16
  22   0   2 1253.62   50.33
 -22   0  -2 1204.03   50.42
  22   0   2 1270.84   50.40
  23   0   2  359.28   16.04
  23   0   2  372.03   16.18
  24   0   2    1.75    2.58
  24   0   2    3.90    2.35
  24   0   2    3.24    1.78
  25   0   2  276.54   11.99
  25   0   2  249.98   11.37
  26   0   2 1061.79   44.66
  26   0   2 1218.68   45.32
  27   0   2    2.52    2.05
  27   0   2    2.11    1.29
  28   0   2  409.46   15.11
  28   0   2  329.58   14.38
  29   0   2  173.61    7.37
  29   0   2  153.42    7.20
  30   0   2   56.50    2.66
  30   0   2   32.42    2.23
 -31   0  -2   17.48    1.33
 -32   1   2   17.29    1.49
 -32   1   2   14.25    1.55
 -31   1   2   38.79    2.70
  31   1  -2   46.94    2.44
 -31   1   2   40.72    2.79
 -31  -1   2   37.13    2.46
  30  -1  -2  164.44    7.59
  30   1  -2  169.36    7.66
  29   1  -2   12.63    2.28
  29   1  -2   11.63    1.89
  29  -1  -2   14.50    1.88
  28   1  -2  190.83    8.85
  28  -1  -2  188.44    8.78
  28   1  -2  201.57    9.11
  27   1  -2   90.35    5.09
  27  -1  -2   87.39    4.98
  27   1  -2   90.94    5.31
  26   1  -2   31.16    3.08
  26   1  -2   32.44    3.31
  26  -1  -2   29.92    2.97
  25   1  -2  219.88   10.51
  25  -1  -2  223.91   10.40
  24   1  -2   38.73    3.73
  24  -1  -2   45.82    3.62
  23   1  -2   35.43    3.49
  23  -1  -2   38.10    3.43
 -23   1   2   33.55    3.50
  22   1  -2  252.20   11.65
 -22   1   2  248.21   11.72
 -21   1   2    8.22    2.53
  21   1  -2    9.50    2.66
  21   1  -2   15.41    2.73
  20   1  -2  276.92   12.69
  20  -1  -2  265.13   12.39
 -20   1   2  297.07   12.87
  20   1  -2  283.54   12.71
  19   1  -2  642.44   27.01
  19   1  -2  613.00   27.19
 -19   1   2  663.06   27.48
 -18   1   2   13.77    2.59
 -17   1   2  468.66   19.97
 -16   1   2  343.18   15.08
 -15   1   2  108.55    6.01
 -14   1   2  449.54   19.05
 -13   1   2 2867.80  113.16
 -12   1   2    0.09    2.52
  11   1  -2 2142.81   83.98
 -11   1   2 2111.21   84.08
  10   1  -2  153.27    6.96
 -10   1   2  156.57    7.24
   9   1  -2  157.23    7.09
  -9   1   2  162.41    7.21
  -8   1   2  532.90   21.31
   8   1  -2  520.35   21.21
  -7   1   2 4573.61  178.92
  -6   1   2   32.52    2.05
   6   1  -2   35.93    2.04
  -4   1   2  142.49    5.87
  -3   1   2   59.29    2.57
  -2   1   2   29.07    1.34
   0   1   2   20.10    1.00
   2   1   2    3.73    0.74
   2  -1   2    2.85    0.61
   3   1   2  180.69    8.13
  -3  -1  -2  194.42    7.90
  -4  -1  -2    3.67    0.40
   4   1   2    3.40    1.08
   4  -1   2    3.42    0.56
   5  -1   2  524.09   20.47
   5   1   2  509.70   20.86
   6   1   2    9.66    1.52
   6  -1   2    7.80    0.65
  -6   1  -2    9.11    1.28
  -7   1  -2 1223.80   49.66
   7   1   2 1249.53   49.70
   7  -1   2 1262.15   49.12
  -7   1  -2 1263.39   49.70
   8  -1   2   35.27    1.60
  -8   1  -2   33.16    2.58
  -8   1  -2   36.63    2.43
  -9   1  -2  809.76   33.76
   9  -1   2  852.55   33.02
  -9   1  -2  816.66   33.80
  10  -1   2   17.88    0.96
 -10   1  -2   25.44    2.16
 -10   1  -2   24.87    2.52
 -11   1  -2  196.33    8.93
 -12   1  -2    6.86    2.29
 -13   1  -2  628.23   25.85
 -14   1  -2   29.37    2.81
 -15   1  -2  781.94   32.02
 -16   1  -2   66.67    4.33
 -17   1  -2   55.21    4.08
  17   1   2   54.94    3.77
  17   1   2   61.87    4.30
  17  -1   2   54.80    3.91
  17   1   2   47.03    3.69
  18  -1   2  540.12   22.09
 -18   1  -2  532.76   22.25
  18   1   2  508.87   22.20
  18   1   2  521.36   22.02
  18   1   2  500.33   22.02
  18  -1   2  531.39   22.08
  19   1   2  493.12   21.79
  19   1   2  543.57   22.11
 -19   1  -2  523.52   22.05
  19   1   2  507.33   21.75
  19  -1   2  514.78   21.81
  19  -1   2  511.60   21.81
  20  -1   2   18.68    2.75
  20   1   2   15.49    2.58
  20   1   2   22.13    3.45
 -20   1  -2   15.58    2.80
  20  -1   2   19.85    2.92
  20   1   2   11.64    2.83
  21   1   2  668.88   28.42
 -21   1  -2  653.46   28.52
  21   1   2  711.33   28.64
  21  -1   2  701.25   28.43
  21   1   2  673.32   28.31
 -22   1  -2  304.15   13.46
  22   1   2  304.01   13.32
  22   1   2  277.74   13.24
  22  -1   2  265.75   12.95
  22   1   2  292.62   13.09
  22  -1   2  296.89   12.82
  23   1   2   27.75    3.50
  23  -1   2   25.75    2.58
  23  -1   2   29.92    3.18
  23   1   2   22.90    3.21
  24  -1   2  483.31   20.63
  24   1   2  475.15   21.09
  24   1   2  542.51   21.30
  25   1   2  100.80    5.41
  25  -1   2   96.81    5.19
  26   1   2   42.32    3.51
  26  -1   2   42.06    2.74
  26   1   2   40.79    2.92
  27   1   2  232.86   10.10
  27   1   2  256.50   10.67
  27  -1   2  226.55    9.94
  28   1   2  253.94   11.36
  28  -1   2  275.51   11.82
  29  -1   2   25.78    2.09
  29   1   2   29.95    2.27
  30  -1   2  225.04    9.87
  30   1   2  212.20    9.79
 -32   2   2  112.37    5.18
  32   2  -2  113.91    4.96
 -32   2   2  123.47    5.24
 -32  -2   2  116.71    5.19
 -31   2   2   16.25    1.93
  31  -2  -2   15.85    1.85
 -31   2   2   13.47    1.81
 -31  -2   2   10.98    1.77
  31   2  -2   17.78    1.53
 -31  -2   2   13.79    1.39
  30   2  -2  304.05   12.38
 -30   2   2  294.07   12.63
  30  -2  -2  275.92   12.57
 -30  -2   2  299.70   12.64
  29  -2  -2  139.42    6.62
  29   2  -2  130.25    6.32
  29   2  -2  143.97    6.62
  29  -2  -2  125.05    6.18
  28  -2  -2    4.83    1.72
  28   2  -2    5.42    2.18
  28  -2  -2   10.33    2.39
  28   2  -2    7.85    1.87
  27   2  -2  192.33    9.17
  27  -2  -2  208.24    9.39
  27   2  -2  192.96    9.27
  27  -2  -2  192.44    9.02
  26   2  -2  606.18   25.16
  26  -2  -2  624.26   25.02
  26  -2  -2  573.13   25.09
  25  -2  -2   50.89    3.72
  25  -2  -2   45.06    3.88
  25   2  -2   50.43    3.97
  24  -2  -2  510.35   21.82
  24  -2  -2  521.84   21.71
  24   2  -2  503.47   21.76
 -23   2   2  665.03   28.27
  23   2  -2  650.60   28.09
  23  -2  -2  728.23   28.19
  23  -2  -2  657.63   28.11
 -23  -2   2  674.64   28.28
 -22  -2   2   47.30    3.96
 -22   2   2   46.23    3.97
  22  -2  -2   38.51    3.73
  22   2  -2   41.58    3.73
  22  -2  -2   45.20    3.65
 -21  -2   2  736.27   29.23
  21  -2  -2  729.41   29.01
 -21   2   2  711.49   29.16
  21   2  -2  686.08   29.04
  21  -2  -2  674.41   28.89
  21   2  -2  655.62   28.88
  20  -2  -2  633.17   27.00
  20   2  -2  646.73   27.15
  20   2  -2  615.02   26.64
  20  -2  -2  677.01   27.10
 -20   2   2  682.74   27.28
  20   2  -2  624.13   27.01
 -20  -2   2  683.73   27.29
  19   2  -2   16.32    2.78
  19  -2  -2   16.80    2.73
 -19  -2   2   22.38    2.77
 -19   2   2   20.97    2.69
  19   2  -2   21.27    2.34
  19   2  -2   20.19    2.82
 -18  -2   2  322.20   14.25
 -18   2   2  313.31   14.22
 -17  -2   2 1613.97   62.50
 -17   2   2 1504.87   62.39
 -16   2   2  110.49    6.07
 -16  -2   2  108.77    6.05
 -15   2   2  606.93   25.96
 -15  -2   2  648.14   26.07
 -14  -2   2  784.05   31.67
 -14   2   2  763.68   31.65
 -13   2   2  105.89    5.96
 -13  -2   2  116.18    6.07
 -12  -2   2   81.79    4.72
 -12   2   2   78.49    4.70
 -11   2   2  870.95   35.88
 -11  -2   2  889.53   35.88
  11   2  -2  891.89   35.78
  11  -2  -2  911.39   35.79
 -10  -2   2  157.02    7.27
 -10   2   2  147.30    7.23
  10  -2  -2  164.54    7.13
  10   2  -2  155.76    7.07
  -9  -2   2  402.99   16.45
   9  -2  -2  398.95   16.37
   9   2  -2  401.46   16.38
  -9   2   2  392.60   16.47
   8  -2  -2    2.65    1.31
  -8   2   2    3.09    1.52
   8   2  -2    2.20    1.23
  -8  -2   2    0.94    1.41
   7   2  -2  149.51    6.43
  -7  -2   2  142.18    6.45
   7  -2  -2  154.63    6.45
  -7   2   2  149.51    6.47
   6   2  -2   16.05    1.36
   6  -2  -2   14.30    1.42
  -6   2   2   14.15    1.42
  -6  -2   2   14.94    1.44
  -5  -2   2  323.12   13.10
  -5   2   2  329.73   13.10
  -4   2   2   22.18    1.31
  -4  -2   2   21.38    1.30
  -4  -2   2   20.32    1.65
  -3   2   2  494.03   20.17
  -3  -2   2  498.03   20.36
  -3  -2   2  539.68   20.18
  -2  -2   2    7.23    0.99
  -2   2   2    6.81    0.65
  -2  -2   2    7.28    0.64
   0   2   2   15.50    0.85
   0  -2   2   13.37    0.86
   2  -2   2   19.50    1.33
   2  -2   2   18.76    1.17
  -2  -2  -2   20.02    1.13
   2   2   2   18.39    1.18
   3  -2   2  357.53   14.01
   3   2   2  342.44   14.05
   3  -2   2  340.41   14.06
  -3  -2  -2  359.61   13.92
   4  -2   2  121.16    5.03
  -4  -2  -2  121.63    4.93
   4   2   2  117.10    5.21
   4  -2   2  118.29    5.22
   5  -2   2 3486.38  139.92
   5   2   2 3465.59  139.92
  -5  -2  -2 3655.02  139.59
   5  -2   2 3567.53  139.66
   6  -2   2   24.55    1.91
  -6  -2  -2   23.97    1.28
  -6  -2  -2   28.67    1.90
   6   2   2   28.64    2.05
  -6   2  -2   26.57    1.81
   6  -2   2   21.86    1.42
  -7  -2  -2  287.25   11.61
  -7   2  -2  255.03   11.49
  -7   2  -2  273.04   11.58
   7  -2   2  286.18   11.10
  -7  -2  -2  266.32   11.50
   8  -2   2 1019.38   40.14
  -8   2  -2  982.35   40.68
  -8  -2  -2 1043.58   40.72
  -8  -2  -2 1031.18   40.69
  -8   2  -2 1032.83   40.70
   9  -2   2 2373.02   90.80
  -9   2  -2 2244.00   91.42
  -9   2  -2 2229.41   91.39
  -9  -2  -2 2296.87   91.43
  -9  -2  -2 2360.60   91.45
 -10   2  -2    4.93    1.92
 -10  -2  -2    6.49    2.30
 -10   2  -2    6.52    2.30
  10  -2   2    6.75    0.81
 -11  -2  -2 2706.02   95.85
 -11   2  -2 2588.07   95.80
 -12   2  -2 1170.73   47.63
 -12  -2  -2 1210.27   47.67
 -13  -2  -2    4.62    2.24
 -13   2  -2    4.66    2.24
 -14   2  -2  706.63   29.10
 -14  -2  -2  710.26   29.08
 -15   2  -2 1261.20   51.11
 -15  -2  -2 1281.59   51.12
 -16   2  -2   17.65    2.57
 -16  -2  -2   17.89    2.64
  17   2   2  688.14   30.17
  17   2   2  797.14   30.72
  17  -2   2  742.26   30.29
 -17   2  -2  756.05   30.47
  17   2   2  742.61   30.26
  17  -2   2  706.54   30.22
 -17  -2  -2  733.49   30.39
  18   2   2  482.37   21.14
  18  -2   2  465.80   20.98
  18   2   2  502.39   21.15
  18   2   2  496.57   21.47
 -18  -2  -2  528.57   21.41
 -18   2  -2  536.95   21.47
  18  -2   2  498.18   21.20
  18  -2   2  501.84   21.22
 -19  -2  -2   63.27    4.65
  19  -2   2   75.06    4.56
  19   2   2   70.21    4.50
  19  -2   2   58.24    4.51
 -19   2  -2   67.95    4.75
  19   2   2   61.52    4.48
  20   2   2  255.93   11.58
 -20  -2  -2  244.80   11.27
  20  -2   2  233.08   10.95
  20  -2   2  234.60   11.22
  20   2   2  229.92   11.00
  20   2   2  224.28   11.12
  20  -2   2  239.98   10.70
 -20   2  -2  241.75   11.29
  21   2   2  150.53    7.87
  21  -2   2  150.44    7.10
  21   2   2  140.27    7.39
  21  -2   2  137.37    7.57
  21  -2   2  136.23    7.27
  21   2   2  141.53    7.56
 -21  -2  -2  140.05    7.66
 -21   2  -2  154.19    7.81
  22  -2   2    0.99    2.43
  22  -2   2    1.97    1.71
  22   2   2   -0.14    2.46
  22  -2   2    0.24    2.08
  22   2   2    5.43    2.17
  22   2   2    3.70    2.72
  23   2   2  193.27    9.09
  23   2   2  191.59    9.27
  23   2   2  202.91    9.54
  23  -2   2  177.73    8.81
  23  -2   2  184.90    8.64
  23  -2   2  185.39    9.27
  24   2   2   11.27    2.73
  24  -2   2   15.18    2.89
  24  -2   2   11.81    1.88
  24   2   2   10.71    2.71
  25  -2   2   70.65    3.93
  25   2   2   72.07    4.66
  25  -2   2   77.33    4.86
  26  -2   2   13.88    1.65
  26   2   2   12.37    1.94
  26  -2   2   15.04    2.59
  26   2   2   15.60    2.52
  27   2   2    0.50    1.38
  27  -2   2    0.80    1.86
  27  -2   2   -0.77    1.97
  27   2   2   -1.33    1.99
  28  -2   2   15.24    2.17
  28   2   2   18.11    2.20
  28  -2   2   21.12    2.22
  28   2   2   18.22    1.67
  29  -2   2  104.20    4.74
  29   2   2  109.41    4.77
  29  -2   2   96.85    4.66
  30  -2   2   10.65    1.40
  30   2   2   12.87    1.41
  30  -2   2    9.22    1.19
  30   2   2    6.71    1.07
  32  -3  -2   78.91    3.62
 -32  -3   2   69.70    3.48
 -32   3   2   82.14    3.67
 -31  -3   2   37.83    2.58
  31  -3  -2   44.82    2.73
 -31   3   2   41.83    2.62
  31   3  -2   45.57    2.45
  30  -3  -2   39.80    2.75
  30   3  -2   34.54    2.34
 -30  -3   2   31.33    2.55
  29  -3  -2    8.03    2.13
  29  -3  -2    7.81    2.01
  29   3  -2    6.44    1.91
  29   3  -2    6.77    1.73
  28   3  -2  620.78   25.39
  28  -3  -2  630.86   25.45
  28  -3  -2  597.83   25.14
  28   3  -2  624.92   25.36
  27   3  -2  210.65    9.52
  27  -3  -2  201.32    9.25
  27  -3  -2  197.06    9.51
  26  -3  -2  279.97   12.42
  26  -3  -2  285.22   12.67
  26   3  -2  277.67   12.61
  25  -3  -2  291.44   12.52
  25  -3  -2  284.07   12.69
  25   3  -2  262.61   12.55
  24   3  -2  281.35   12.52
  24  -3  -2  259.39   12.39
  24  -3  -2  274.50   12.31
 -23  -3   2    7.94    2.40
  23  -3  -2    5.55    2.25
 -23   3   2    6.03    2.29
  23   3  -2    5.99    2.72
  23  -3  -2    5.30    2.66
 -22  -3   2 1069.90   43.28
  22   3  -2 1074.00   43.16
  22  -3  -2 1034.84   43.07
  22  -3  -2 1079.12   43.06
 -22   3   2 1037.58   43.24
  21  -3  -2  465.34   20.89
 -21   3   2  477.57   21.08
  21  -3  -2  519.48   21.00
  21   3  -2  502.77   21.03
 -21  -3   2  494.47   21.14
  20  -3  -2  231.66   10.82
  20   3  -2  240.94   10.89
 -20   3   2  226.95   10.92
  20   3  -2  228.85   11.11
  20   3  -2  210.51   10.29
 -20  -3   2  250.73   11.10
  20  -3  -2  238.80   10.77
 -19  -3   2  893.15   34.31
 -19   3   2  876.57   34.27
  19  -3  -2  786.58   33.93
  19   3  -2  793.24   33.96
  19   3  -2  873.36   34.36
  19  -3  -2  877.28   34.08
  19   3  -2  762.59   33.52
  18   3  -2  316.79   14.02
  18   3  -2  323.40   14.33
  18  -3  -2  304.72   13.97
 -18   3   2  315.46   14.17
 -18  -3   2  326.18   14.24
 -17   3   2  129.17    6.99
 -17  -3   2  140.39    7.12
 -16  -3   2  753.29   30.23
 -16   3   2  711.23   30.16
 -15  -3   2 1006.16   40.16
 -15   3   2  972.64   40.14
 -14  -3   2   52.55    3.78
 -14   3   2   41.70    3.64
 -13  -3   2  797.13   32.59
 -13   3   2  804.71   32.63
 -12  -3   2  160.35    7.41
 -12   3   2  144.31    7.38
 -11  -3   2  134.83    6.42
 -11   3   2  127.39    6.44
  10  -3  -2   23.81    2.09
 -10  -3   2   24.55    2.39
  10   3  -2   25.16    2.11
 -10   3   2   23.77    2.48
  -9   3   2  262.92   11.73
   9   3  -2  284.86   11.73
  -9  -3   2  279.65   11.75
   9  -3  -2  287.79   11.73
   8  -3  -2    4.01    1.25
  -8  -3   2    4.70    1.37
   8   3  -2    4.61    1.25
  -8   3   2    4.69    1.45
   7   3  -2  321.36   13.54
  -7   3   2  336.76   13.52
  -7  -3   2  334.18   13.52
   7  -3  -2  334.76   13.56
  -6  -3   2    4.44    1.32
   6   3  -2    4.56    1.06
  -6   3   2    4.06    1.02
  -6  -3   2    4.27    0.99
   6  -3  -2    4.02    0.98
  -5  -3   2   98.18    4.38
  -5  -3   2   94.76    4.07
   5  -3  -2   92.63    4.12
   5   3  -2   94.75    4.12
  -5   3   2   93.18    4.07
  -4  -3   2   12.59    0.94
  -4   3   2   10.06    0.93
  -4  -3   2   11.77    1.39
  -3   3   2  537.68   21.17
  -3  -3   2  545.57   21.48
  -3  -3   2  535.82   21.17
  -2  -3   2   16.34    1.62
  -2  -3   2   16.21    0.90
  -2   3   2   17.45    0.91
  -1   3   2  489.63   18.77
  -1  -3   2  477.70   18.77
  -1  -3   2  440.55   19.07
   0   3   2   67.32    2.83
   0  -3   2   67.96    2.84
   1  -3   2 3241.66  126.82
   2  -3   2   82.41    3.59
   2  -3   2   81.81    3.76
  -2  -3  -2   81.76    3.61
   2   3   2   85.60    3.58
  -3  -3  -2 3055.00  117.51
   3  -3   2 2931.03  117.56
   3  -3   2 3014.83  117.62
   3   3   2 3013.39  117.57
   4  -3   2  243.24   10.25
   4  -3   2  245.40   10.18
  -4  -3  -2  255.86   10.06
   4   3   2  247.89   10.25
   5  -3   2   12.63    1.36
  -5  -3  -2   12.56    1.41
   5  -3   2   13.33    1.46
  -5  -3  -2   12.44    1.07
  -5   3  -2   14.51    1.39
   5   3   2   10.92    1.51
  -6  -3  -2   34.67    2.27
  -6  -3  -2   34.68    1.80
  -6  -3  -2   35.92    2.40
   6  -3   2   30.16    1.98
  -6   3  -2   32.07    2.30
  -6   3  -2   32.90    2.18
  -7  -3  -2 4817.24  179.03
   7  -3   2 4604.98  178.66
  -7  -3  -2 4608.52  178.98
  -7   3  -2 4596.57  178.99
  -7  -3  -2 4442.82  178.53
  -7   3  -2 4506.20  178.97
  -8   3  -2  303.39   13.41
  -8  -3  -2  326.82   13.50
  -8  -3  -2  340.80   13.46
  -8   3  -2  317.21   13.40
   8  -3   2  315.25   12.98
   9  -3   2 3585.66  140.74
  -9  -3  -2 3676.53  141.28
  -9   3  -2 3480.18  141.22
  -9  -3  -2 3707.36  141.28
  -9   3  -2 3558.19  141.23
 -10   3  -2 1185.52   48.18
  10  -3   2 1180.91   47.57
 -10  -3  -2 1300.19   48.28
 -11  -3  -2  431.23   17.78
 -11   3  -2  413.43   17.72
  11  -3   2  423.70   16.96
 -12   3  -2  117.50    6.00
 -12  -3  -2  113.19    5.94
 -13  -3  -2 1998.90   78.73
 -13   3  -2 1969.36   78.71
 -14   3  -2  693.28   28.92
 -14  -3  -2  715.62   28.96
 -15   3  -2  539.61   22.96
 -15  -3  -2  557.99   23.00
 -16  -3  -2  830.41   33.40
 -16   3  -2  796.21   33.35
 -17   3  -2  103.03    5.66
  17   3   2   92.67    5.55
  17   3   2   88.22    5.92
  17   3   2   91.99    5.42
  17  -3   2   93.99    5.58
 -17  -3  -2  108.23    5.68
 -17  -3  -2   92.23    5.57
  18   3   2   43.96    3.47
  18   3   2   36.10    3.87
  18   3   2   38.36    3.43
  18  -3   2   36.77    2.94
 -18   3  -2   42.00    3.70
 -18  -3  -2   40.39    3.65
  18  -3   2   39.18    3.51
 -19   3  -2  256.57   11.80
  19   3   2  251.00   11.57
 -19  -3  -2  249.47   11.72
  19  -3   2  238.65   11.11
  19   3   2  251.21   11.67
  19  -3   2  261.39   11.75
  19   3   2  267.22   12.15
  20  -3   2  436.65   19.56
 -20  -3  -2  490.05   20.37
  20   3   2  471.81   20.08
 -20   3  -2  497.12   20.44
  20   3   2  480.73   20.56
  20   3   2  480.45   20.17
  20  -3   2  456.73   20.15
  21  -3   2  287.92   12.80
  21  -3   2  265.65   12.08
  21   3   2  291.92   12.76
 -21   3  -2  271.08   12.75
  21   3   2  309.06   13.24
  21   3   2  265.59   12.48
 -21  -3  -2  266.41   12.68
  22   3   2   50.25    3.88
  22  -3   2   54.90    4.28
  22  -3   2   50.28    3.41
  22   3   2   55.83    4.19
  22   3   2   57.10    4.54
  23   3   2   21.09    2.79
  23   3   2   23.84    3.01
  23  -3   2   20.68    2.96
  23   3   2   26.52    3.38
  23  -3   2   22.06    2.25
  24   3   2   50.19    3.71
  24  -3   2   41.71    3.71
  24  -3   2   38.91    2.82
  24   3   2   43.92    3.89
  25   3   2   69.46    4.45
  25  -3   2   72.60    4.56
  26  -3   2   21.45    2.71
  26  -3   2   19.14    2.64
  26   3   2   21.94    2.62
  27  -3   2  102.90    5.27
  27   3   2   95.26    4.90
  27   3   2  100.87    5.18
  27  -3   2  102.88    5.34
  28  -3   2    0.32    1.63
  28   3   2    1.16    1.58
  28  -3   2   -1.19    1.67
  28   3   2    0.11    1.14
  29  -3   2   32.86    2.34
  29  -3   2   32.32    2.27
  29   3   2   29.55    1.86
  29   3   2   36.02    2.28
  30  -3   2   13.68    1.27
 -30   3  -2   10.67    1.29
 -30  -3  -2   12.30    1.29
  32  -4  -2   46.81    2.40
 -31   4   2   18.29    1.78
  31  -4  -2   16.16    1.71
  31   4  -2   16.09    1.41
 -31  -4   2   12.85    1.42
 -31   4   2   10.62    1.37
 -30   4   2   24.23    2.39
 -30   4   2   19.87    1.98
  30  -4  -2   16.56    1.57
  30   4  -2   24.03    1.94
 -30  -4   2   23.46    2.11
  30  -4  -2   24.10    2.24
 -29   4   2   73.15    4.17
  29   4  -2   79.65    4.11
  29  -4  -2   67.64    3.89
  29  -4  -2   78.24    4.41
 -29  -4   2   75.24    4.20
  28   4  -2   14.24    2.20
  28  -4  -2   16.25    2.32
  28  -4  -2   15.97    2.69
  28   4  -2   12.28    2.19
  27   4  -2    1.44    2.04
  27  -4  -2    3.19    2.14
  27  -4  -2    0.63    1.67
  26   4  -2   69.13    4.32
  26  -4  -2   60.71    3.94
  26  -4  -2   62.95    4.29
  25  -4  -2   48.41    3.81
  25  -4  -2   44.10    3.40
  25   4  -2   43.24    3.70
  24   4  -2   86.54    5.17
  24  -4  -2   75.07    5.04
  24  -4  -2   77.89    4.79
  23  -4  -2  139.23    7.00
  23   4  -2  133.24    7.14
  23  -4  -2  130.65    7.14
 -22  -4   2   33.89    3.25
  22  -4  -2   26.15    3.33
 -22   4   2   25.55    3.04
  22  -4  -2   33.25    3.15
  22   4  -2   28.68    3.37
 -21   4   2   91.51    5.53
  21   4  -2   89.13    5.53
  21  -4  -2   96.26    5.61
 -21  -4   2   84.19    5.52
  21  -4  -2   94.45    5.41
  20  -4  -2    0.52    1.94
  20  -4  -2    3.84    2.30
 -20  -4   2    2.78    2.35
  20   4  -2    2.00    2.33
 -20   4   2    3.78    2.37
  20   4  -2    0.80    2.96
  19   4  -2   18.32    3.16
  19  -4  -2   18.21    2.82
  19  -4  -2   17.01    2.61
 -19   4   2   16.62    2.82
 -19  -4   2   14.84    2.71
  19   4  -2   18.54    2.83
 -18  -4   2  159.42    7.70
  18  -4  -2  142.99    7.37
  18   4  -2  140.00    7.35
  18   4  -2  160.16    8.06
  18  -4  -2  134.39    7.32
 -18   4   2  150.01    7.60
 -17   4   2   33.62    3.23
 -17  -4   2   39.95    3.31
 -16  -4   2  110.55    5.92
 -16   4   2   99.20    5.80
 -15  -4   2  138.69    6.88
 -15   4   2  128.19    6.86
 -14   4   2    0.88    2.10
 -14  -4   2    4.52    2.15
 -13  -4   2  293.51   12.64
 -13   4   2  282.75   12.64
 -12  -4   2   89.07    4.96
 -12   4   2   90.28    5.00
 -11   4   2  202.25    9.14
 -11  -4   2  206.13    9.12
 -10   4   2   80.67    4.37
 -10  -4   2   84.89    4.37
  -9   4   2  481.66   19.50
   9   4  -2  479.27   19.55
  -9  -4   2  478.51   19.50
   8  -4  -2    7.49    1.29
  -8  -4   2    8.75    1.56
   8   4  -2    8.59    1.34
  -8   4   2    8.24    1.39
  -8  -4   2    7.89    1.35
   7   4  -2  191.22    8.19
  -7   4   2  191.53    8.08
   7  -4  -2  188.33    8.19
  -7  -4   2  203.45    8.36
  -7  -4   2  195.70    8.11
   6   4  -2   17.70    1.44
   6  -4  -2   15.64    1.31
  -6   4   2   18.11    1.30
  -6  -4   2   18.22    1.68
  -6  -4   2   15.99    1.31
  -5   4   2  231.54    9.21
  -5  -4   2  232.58    9.23
  -5  -4   2  232.66    9.61
   5  -4  -2  223.50    9.32
   5   4  -2  219.17    9.31
   4  -4  -2   33.65    1.69
  -4  -4   2   33.41    1.61
  -4   4   2   30.99    1.58
  -4  -4   2   35.18    2.20
   4   4  -2   34.72    1.74
  -3  -4   2 1548.05   59.33
  -3   4   2 1486.19   59.32
  -3  -4   2 1522.59   59.73
  -2   4   2  350.66   14.03
  -2  -4   2  364.25   14.04
  -2  -4   2  345.75   14.49
  -1  -4   2  270.08   11.47
  -1   4   2  277.57   11.01
  -1  -4   2  281.95   11.01
   0   4   2   96.50    3.81
   0  -4   2   88.67    3.80
   0  -4  -2   98.33    4.22
   1  -4   2   14.73    1.45
   1   4   2   11.25    0.82
   1  -4   2   14.14    0.88
  -2  -4  -2    4.91    1.03
   2   4   2    4.06    0.87
   2  -4   2    6.68    1.37
   3  -4   2 1437.16   54.39
  -3  -4  -2 1365.92   54.21
   3  -4   2 1351.16   54.23
   3   4   2 1378.29   54.23
  -4  -4  -2  174.78    7.06
   4   4   2  167.72    7.07
   4  -4   2  163.89    7.07
   4  -4   2  157.85    7.08
  -4  -4  -2  160.44    6.91
  -4   4  -2  164.41    6.98
  -5  -4  -2  455.91   18.15
   5  -4   2  440.40   18.13
  -5  -4  -2  461.00   18.18
  -5   4  -2  425.24   18.10
  -5  -4  -2  462.93   17.97
  -5   4  -2  441.36   18.14
   6  -4   2  229.50   10.27
  -6   4  -2  241.44   10.40
  -6  -4  -2  252.96   10.10
  -6  -4  -2  258.64   10.42
  -6   4  -2  230.46   10.32
  -6  -4  -2  264.06   10.50
  -7   4  -2    7.66    1.79
  -7  -4  -2    5.76    1.94
   7  -4   2    4.09    1.40
  -7  -4  -2    4.94    1.59
  -7   4  -2    6.40    1.56
  -7  -4  -2    5.14    1.08
   8  -4   2    2.87    1.36
  -8  -4  -2    2.12    1.05
  -8   4  -2    0.93    2.00
  -8  -4  -2    2.03    1.57
  -8  -4  -2    2.43    1.94
  -8   4  -2    1.66    1.62
  -9   4  -2  225.73    9.92
  -9   4  -2  236.36   10.01
  -9  -4  -2  224.36    9.93
   9  -4   2  220.17    9.55
  -9  -4  -2  230.35   10.01
 -10  -4  -2   84.25    4.51
  10  -4   2   75.69    3.79
 -10   4  -2   78.96    4.49
  11  -4   2  218.76    9.00
 -11   4  -2  207.40    9.63
 -11  -4  -2  207.84    9.63
 -12  -4  -2  105.41    5.29
 -12   4  -2   89.36    5.13
  12  -4   2   92.44    4.31
 -13   4  -2  139.61    7.19
 -13  -4  -2  157.08    7.30
 -14   4  -2   75.94    4.61
 -14  -4  -2   77.48    4.65
 -15   4  -2   12.47    2.41
 -15  -4  -2   17.48    2.58
 -16   4  -2    8.46    2.20
 -16  -4  -2    6.90    2.64
  16  -4   2    6.22    2.36
  16   4   2    7.88    2.26
  16   4   2    7.94    2.22
 -16  -4  -2    9.11    2.30
  17   4   2  185.27    9.20
 -17   4  -2  194.48    9.35
 -17  -4  -2  205.50    9.43
 -17  -4  -2  191.08    9.50
  17  -4   2  191.55    9.23
  17   4   2  196.75    9.28
 -18   4  -2   72.03    4.74
 -18  -4  -2   62.65    4.73
  18   4   2   67.50    4.59
  18   4   2   73.89    4.66
 -18  -4  -2   76.33    4.83
  18  -4   2   64.41    4.53
  19   4   2  154.14    7.87
 -19   4  -2  147.90    7.90
  19   4   2  157.78    7.82
  19  -4   2  150.83    7.89
 -19  -4  -2  162.14    8.00
 -20  -4  -2   63.31    4.61
  20  -4   2   66.18    4.60
 -20   4  -2   63.39    4.65
  20   4   2   60.10    4.37
  20   4   2   77.03    5.30
  20   4   2   67.02    4.54
  21   4   2   25.63    3.16
  21   4   2   25.25    2.89
  21   4   2   24.31    3.56
 -21  -4  -2   17.46    2.63
  21  -4   2   20.64    3.13
 -21   4  -2   15.52    2.58
  22  -4   2   38.72    3.59
  22   4   2   39.67    4.07
  22   4   2   35.67    3.40
  22   4   2   33.14    3.22
  23  -4   2   84.25    5.22
  23   4   2   81.97    4.89
  23   4   2   82.96    5.16
  23   4   2   91.46    5.66
  24  -4   2   46.29    3.38
  24   4   2   49.53    3.77
  24  -4   2   53.10    3.83
  25   4   2   75.81    4.48
  25  -4   2   73.57    4.74
  25  -4   2   70.37    4.49
  26   4   2  116.91    5.76
  26  -4   2  109.82    5.95
  26  -4   2  108.39    5.75
  27  -4   2    6.93    1.91
  27   4   2    2.90    1.71
  27  -4   2    7.64    1.97
  28   4   2   16.08    1.87
  28  -4   2   18.33    1.94
  28  -4   2   18.65    2.09
  28   4   2   19.49    1.68
  29  -4   2    1.07    1.14
  29   4   2    2.27    1.10
  29  -4   2    1.40    1.32
  29   4   2    2.92    0.90
 -30   4  -2   12.40    1.32
  31   5  -2    0.83    0.90
  31  -5  -2    0.94    1.14
 -31   5   2    2.05    1.22
  30  -5  -2   44.55    2.72
 -30   5   2   40.66    2.74
 -30  -5   2   35.11    2.25
  30   5  -2   41.60    2.39
 -30   5   2   34.73    2.20
  29  -5  -2   79.82    4.37
 -29  -5   2   78.58    4.06
  29  -5  -2   68.58    3.85
 -29   5   2   85.46    4.50
 -29   5   2   67.52    3.93
  28  -5  -2   57.03    3.84
 -28   5   2   69.63    3.97
  28  -5  -2   72.65    4.34
 -28  -5   2   69.81    4.02
  27   5  -2   68.17    4.05
  27  -5  -2   65.52    4.50
  27  -5  -2   68.55    4.17
  26  -5  -2   37.29    3.23
  26   5  -2   39.31    3.20
  26  -5  -2   37.75    3.66
  25  -5  -2   11.83    2.17
  25  -5  -2   13.97    2.53
  25   5  -2   18.79    2.61
  24  -5  -2  118.97    6.12
  24  -5  -2  109.33    6.20
  24   5  -2  117.85    6.29
  23  -5  -2   34.49    3.08
  23  -5  -2   28.37    3.28
  23   5  -2   37.16    3.42
  22  -5  -2   76.63    4.96
  22   5  -2   85.79    5.13
 -22  -5   2   76.94    5.01
  22  -5  -2   75.33    4.75
 -22   5   2   78.95    4.97
 -21  -5   2    3.79    2.34
  21   5  -2    4.52    2.49
  21  -5  -2    3.04    2.50
 -21   5   2    0.86    2.09
  21  -5  -2    1.29    2.07
  20   5  -2   99.28    5.69
  20  -5  -2   98.88    5.74
 -20   5   2   89.53    5.60
 -20  -5   2  102.77    5.78
  20  -5  -2   94.34    5.55
  19  -5  -2    1.42    2.25
  19   5  -2   -0.13    2.18
 -19  -5   2    1.69    2.22
  19  -5  -2    2.84    2.03
 -19   5   2    1.95    2.22
 -18   5   2  625.10   26.12
  18   5  -2  614.03   25.96
  18  -5  -2  589.99   25.94
 -18  -5   2  688.34   26.30
  18  -5  -2  616.14   25.98
  17  -5  -2   39.75    2.64
  17   5  -2   46.34    4.15
 -17  -5   2   39.22    3.40
 -17   5   2   36.31    3.39
 -16   5   2   28.51    2.92
 -16  -5   2   28.15    2.92
 -15  -5   2  190.64    8.86
 -15   5   2  182.72    8.87
 -14   5   2  870.51   36.01
 -14  -5   2  905.39   36.03
 -13   5   2  403.43   17.47
 -13  -5   2  428.54   17.52
 -12  -5   2  906.45   35.50
 -12   5   2  854.93   35.44
 -11   5   2 1480.28   58.99
 -11  -5   2 1495.21   59.00
 -10  -5   2   10.88    1.89
 -10   5   2    9.37    1.77
  -9  -5   2   40.39    2.57
  -9   5   2   40.69    2.54
  -8   5   2  599.44   24.74
  -8  -5   2  630.07   24.78
  -8  -5   2  638.45   25.13
  -7  -5   2 1823.95   67.98
  -7  -5   2 1722.04   67.58
  -7   5   2 1669.60   67.54
  -6  -5   2  356.57   14.21
  -6  -5   2  360.34   14.68
   6  -5  -2  353.73   14.38
   6   5  -2  358.96   14.39
  -6   5   2  347.17   14.18
  -5  -5   2 3335.57  130.03
   5   5  -2 3238.99  129.72
  -5   5   2 3341.97  129.55
   5  -5  -2 3323.87  129.73
  -5  -5   2 3324.10  129.56
   4  -5  -2   16.18    1.10
  -4  -5   2   16.52    1.82
  -4  -5   2   14.28    0.92
  -4   5   2   15.56    0.93
   4   5  -2   14.53    1.13
  -3   5   2  681.99   27.36
   3  -5  -2  679.04   27.45
  -3  -5   2  726.82   27.36
  -3  -5   2  703.36   27.92
   3   5  -2  693.10   27.46
  -2  -5   2   98.66    3.70
  -2   5   2   88.18    3.70
   2   5  -2   91.36    3.75
  -2  -5   2   90.58    4.41
   2  -5  -2   86.12    3.73
   2  -5  -2   93.53    4.38
  -1   5   2 1877.68   73.09
  -1  -5   2 1855.37   73.08
   1  -5  -2 1917.16   73.63
  -1  -5   2 1909.94   73.69
   0  -5  -2  677.30   27.59
   0  -5   2  672.78   27.13
   0   5   2  713.83   27.13
  -1  -5  -2   33.86    2.04
   1   5   2   29.73    1.57
   1  -5   2   32.07    1.62
  -2   5  -2 1025.99   40.73
   2  -5   2 1051.72   41.15
   2   5   2 1003.91   40.74
  -2  -5  -2 1031.89   40.95
  -2  -5  -2 1073.09   40.75
  -3  -5  -2  975.64   38.21
  -3   5  -2  971.65   38.20
  -3  -5  -2  992.13   38.23
  -3  -5  -2  941.96   38.30
  -3   5  -2  949.08   38.20
   3  -5   2  978.29   38.53
  -4   5  -2    4.45    1.22
  -4  -5  -2    3.55    1.18
   4  -5   2    1.90    1.49
  -4  -5  -2    3.06    1.24
  -4  -5  -2    2.52    1.08
  -4   5  -2    4.98    1.09
  -5  -5  -2  300.89   12.10
  -5   5  -2  277.73   12.04
  -5  -5  -2  296.45   12.02
   5  -5   2  300.36   12.29
  -5  -5  -2  303.54   12.15
  -5   5  -2  276.94   12.07
   6  -5   2 1329.11   53.16
  -6   5  -2 1308.63   53.09
  -6  -5  -2 1388.43   53.13
  -6  -5  -2 1401.54   53.12
  -6  -5  -2 1343.34   52.94
  -6   5  -2 1283.57   53.07
  -7  -5  -2  691.97   26.67
  -7   5  -2  653.51   26.63
  -7  -5  -2  657.95   26.39
   7  -5   2  638.60   26.61
  -7  -5  -2  682.20   26.68
  -7   5  -2  643.07   26.61
  -8  -5  -2  735.52   28.56
  -8  -5  -2  740.61   28.57
   8  -5   2  690.94   28.40
  -8   5  -2  685.39   28.48
  -8  -5  -2  705.61   28.19
  -8   5  -2  684.83   28.48
  -9   5  -2  131.79    6.36
   9  -5   2  134.74    6.20
  -9  -5  -2  128.53    5.97
  -9  -5  -2  142.74    6.44
  -9  -5  -2  150.99    6.57
  -9   5  -2  127.66    6.39
 -10  -5  -2  152.62    7.21
  10  -5   2  151.04    6.79
 -10   5  -2  149.78    7.14
 -11  -5  -2  265.78   10.86
  11  -5   2  235.55   10.27
 -11   5  -2  233.00   10.72
  12  -5   2  282.68   12.04
 -12   5  -2  284.08   12.61
 -12  -5  -2  306.06   12.74
 -13  -5  -2  248.79   10.77
 -13   5  -2  226.40   10.64
 -14  -5  -2   46.70    3.54
 -14   5  -2   46.24    3.49
  15   5   2  198.55    9.71
 -15  -5  -2  202.68    9.15
 -15  -5  -2  175.08    9.25
 -15   5  -2  183.61    8.99
 -16  -5  -2   14.04    2.45
  16   5   2   15.59    3.29
  16   5   2   13.21    2.39
 -16  -5  -2   12.45    2.76
 -16   5  -2   13.68    2.39
  16   5   2   12.46    2.29
  16  -5   2   15.39    2.54
 -17  -5  -2  240.90   11.44
  17   5   2  225.51   10.93
 -17  -5  -2  250.62   11.16
  17  -5   2  233.67   10.97
 -17   5  -2  227.57   10.99
  17   5   2  257.34   11.75
  17   5   2  242.00   11.01
  18   5   2   80.57    4.99
 -18   5  -2   77.43    4.98
  18   5   2   83.26    5.70
 -18  -5  -2   85.04    5.12
  18   5   2   75.51    4.90
  18  -5   2   77.87    4.92
 -18  -5  -2   82.50    5.49
 -19   5  -2    4.32    2.23
 -19  -5  -2    2.88    2.72
  19  -5   2    2.59    2.48
  19   5   2    1.27    2.11
  19   5   2    3.56    2.33
  19   5   2    6.70    3.14
 -19  -5  -2    6.93    2.26
 -20   5  -2   65.76    4.46
  20   5   2   66.40    4.46
  20   5   2   68.87    4.54
  20  -5   2   64.00    4.54
 -20  -5  -2   67.37    4.51
  21   5   2  215.93   10.23
  21  -5   2  221.12   10.37
  21   5   2  223.64   10.34
  22   5   2   66.42    4.31
  22  -5   2   65.12    4.81
  22   5   2   70.04    4.46
  22  -5   2   64.27    4.44
  23   5   2  184.16    8.61
  23  -5   2  179.31    8.65
  23   5   2  190.98    8.52
  23  -5   2  158.18    8.41
  23  -5   2  182.99    8.98
  24  -5   2  305.90   13.64
  24  -5   2  277.10   13.06
  24   5   2  314.38   13.27
  24  -5   2  318.18   13.35
  25   5   2    2.15    1.84
  25  -5   2    0.25    2.26
  25  -5   2    0.20    1.92
  26  -5   2   -0.32    1.94
  26   5   2   -2.90    1.73
  26  -5   2    1.45    1.72
  27  -5   2   38.66    2.73
  27   5   2   42.79    2.71
  27  -5   2   42.41    3.08
  28   5   2  186.84    7.94
  28  -5   2  173.10    8.19
  28  -5   2  191.25    8.01
  28   5   2  188.72    7.99
  29  -5   2   54.55    2.84
 -29   5  -2   57.41    2.97
  29   5   2   55.03    2.57
  31   6  -2   27.17    1.57
  31  -6  -2   26.76    1.69
 -31   6   2   22.79    1.66
 -30   6   2    3.98    1.45
  30  -6  -2    1.60    1.44
 -29  -6   2    2.31    1.23
  29  -6  -2    2.99    1.77
 -29   6   2    2.63    1.78
  29  -6  -2    2.20    1.34
 -28   6   2    2.00    2.05
  28  -6  -2    0.20    1.93
  28  -6  -2    1.41    1.68
 -28  -6   2   -1.04    1.52
 -28   6   2    0.70    1.48
 -27  -6   2   57.10    3.64
  27  -6  -2   62.06    4.13
 -27   6   2   54.61    3.55
  27  -6  -2   61.78    3.91
  26   6  -2   61.20    3.71
  26  -6  -2   50.10    4.15
  26  -6  -2   61.45    3.78
  25  -6  -2   12.62    2.93
  25   6  -2   21.32    2.45
  25  -6  -2   16.38    2.44
  24  -6  -2   -1.53    2.59
  24   6  -2    0.45    2.03
  24  -6  -2    0.11    2.02
  23   6  -2    0.12    2.09
  23  -6  -2    1.81    2.19
  23  -6  -2   -0.16    2.58
  22   6  -2  137.40    7.06
  22  -6  -2  133.38    6.93
  22  -6  -2  133.69    6.98
  21  -6  -2   32.85    3.13
  21   6  -2   32.45    3.23
  21  -6  -2   25.08    3.05
 -21  -6   2   31.31    3.12
  20  -6  -2  207.96   10.02
  20   6  -2  212.86   10.06
 -20  -6   2  228.72   10.22
  20  -6  -2  215.09   10.07
 -20   6   2  200.22   10.00
  19   6  -2   23.64    2.87
 -19  -6   2   29.13    2.95
 -19   6   2   23.36    2.83
  19  -6  -2   23.02    2.84
  19  -6  -2   20.17    2.79
  18  -6  -2   22.77    2.70
  18  -6  -2   23.19    2.83
 -18   6   2   22.33    2.70
 -18  -6   2   22.39    2.72
  17   6  -2    4.01    2.87
 -17   6   2    1.11    1.85
  17  -6  -2    1.17    1.34
  17  -6  -2   -0.13    1.88
  17  -6  -2    2.02    2.12
 -17  -6   2    1.00    1.86
 -16  -6   2  415.86   18.26
  16   6  -2  435.84   18.43
 -16   6   2  392.68   17.71
 -16  -6   2  430.42   17.82
  16  -6  -2  413.85   17.42
  15  -6  -2    5.24    1.52
 -15   6   2    2.06    1.78
 -15  -6   2    3.36    1.80
 -14   6   2  701.81   29.76
 -14  -6   2  761.69   29.86
 -13   6   2   25.91    2.42
 -13  -6   2   26.67    2.43
 -12  -6   2   49.31    2.99
 -12   6   2   37.54    2.79
 -11   6   2   57.76    3.37
 -11  -6   2   61.28    3.42
 -10  -6   2  621.68   24.76
 -10   6   2  607.33   24.69
  -9  -6   2  181.50    7.85
  -9   6   2  171.94    7.79
  -8  -6   2  370.21   15.26
  -8  -6   2  369.25   14.72
  -8   6   2  354.32   14.67
  -7  -6   2   20.72    2.22
  -7  -6   2   18.87    1.41
  -7   6   2   22.20    1.45
  -6   6   2   23.81    1.34
  -6  -6   2   22.47    1.36
  -5  -6   2  332.19   12.71
  -5   6   2  301.91   12.67
  -5  -6   2  347.01   13.46
  -4  -6   2  493.12   20.84
  -4   6   2  497.28   20.13
   4  -6  -2  515.88   20.91
  -4  -6   2  527.85   20.12
   3  -6  -2  730.59   28.51
  -3  -6   2  687.74   28.45
   2  -6  -2  459.06   17.89
  -2  -6   2  414.26   17.85
   1  -6  -2  446.23   18.69
  -1  -6   2  474.91   18.82
   0  -6  -2  186.76    8.12
  -1  -6  -2  445.86   18.13
   2  -6   2  366.95   14.02
  -2   6  -2  320.26   13.11
  -2  -6  -2  356.62   13.71
  -2  -6  -2  328.97   13.13
  -3  -6  -2    7.47    0.94
  -3   6  -2    7.69    0.97
  -3   6  -2    6.77    0.87
   3  -6   2    6.88    1.98
  -3  -6  -2    5.82    1.41
  -4  -6  -2  793.93   29.03
  -4   6  -2  676.29   28.67
  -4   6  -2  674.52   28.67
  -4  -6  -2  745.77   28.71
   4  -6   2  778.63   29.34
  -4  -6  -2  742.26   28.72
  -5   6  -2  317.96   13.40
  -5  -6  -2  332.80   13.43
  -5   6  -2  312.15   13.41
  -5  -6  -2  340.77   13.46
   5  -6   2  350.35   13.97
  -5  -6  -2  329.97   13.60
  -6  -6  -2   11.39    1.67
  -6   6  -2   10.01    1.67
  -6  -6  -2   14.21    1.70
   6  -6   2   13.81    2.08
  -7  -6  -2  171.67    7.24
  -7   6  -2  153.78    7.25
   7  -6   2  168.63    7.57
  -7  -6  -2  161.82    7.28
   8  -6   2  364.67   14.99
  -8  -6  -2  352.55   14.69
  -8  -6  -2  370.21   14.89
  -8   6  -2  338.57   14.81
   9  -6   2  418.11   17.07
  -9  -6  -2  408.52   16.79
  -9  -6  -2  452.97   17.14
 -10  -6  -2  472.97   18.38
 -10   6  -2  407.90   18.21
 -10  -6  -2  432.15   17.95
  10  -6   2  452.10   18.22
 -11  -6  -2  175.22    7.63
 -11   6  -2  149.24    7.42
  11  -6   2  156.57    7.23
 -12  -6  -2   13.41    2.11
  12  -6   2   11.72    1.56
 -12   6  -2    9.76    2.00
 -13   6  -2  230.97   10.92
 -13  -6  -2  263.48   11.13
  14   6   2   57.86    4.44
  14   6   2   41.90    3.84
 -14  -6  -2   46.93    4.20
 -14  -6  -2   56.49    3.72
 -14   6  -2   49.85    3.54
 -15  -6  -2  263.52   10.98
  15   6   2  250.06   11.58
 -15   6  -2  227.17   10.72
 -15  -6  -2  226.09   11.25
  15   6   2  220.33   10.78
  16  -6   2    1.73    2.01
 -16  -6  -2    8.47    2.18
  16   6   2    5.90    2.10
 -16   6  -2    4.89    2.03
 -16  -6  -2    1.30    2.70
  16   6   2    9.85    3.29
  17   6   2    1.04    2.91
 -17   6  -2    1.01    1.88
 -17  -6  -2    1.70    1.99
  17  -6   2    2.39    2.18
  17   6   2    2.53    2.06
 -17  -6  -2    1.99    2.93
  18   6   2   -0.35    2.81
 -18  -6  -2    2.14    1.97
  18   6   2   -1.57    2.12
  18  -6   2    2.36    2.62
  18  -6   2    2.45    2.21
 -18   6  -2    1.16    1.92
 -18  -6  -2    2.18    2.61
  18   6   2    0.76    2.09
  19   6   2  139.23    7.09
 -19  -6  -2  142.63    7.81
  19  -6   2  138.45    7.74
  19   6   2  135.48    7.08
  19  -6   2  133.81    7.10
  19   6   2  135.39    7.81
 -19  -6  -2  141.41    7.21
  20   6   2   14.47    2.58
 -20  -6  -2   12.35    2.35
  20  -6   2   13.90    2.98
  20   6   2   12.95    2.35
  20   6   2   20.82    3.57
  20  -6   2   14.68    2.60
  21   6   2  161.25    8.96
  21  -6   2  170.05    8.66
  21  -6   2  170.40    8.82
  21  -6   2  172.75    8.37
  21   6   2  174.18    8.29
  21   6   2  171.84    8.25
  22   6   2   10.30    2.11
  22  -6   2    8.22    2.32
  22  -6   2   11.03    2.85
  22   6   2   10.43    3.17
  22  -6   2   12.92    2.67
  22   6   2    9.90    2.21
  23  -6   2   29.79    3.27
  23   6   2   21.72    2.58
  23   6   2   24.86    2.45
  23  -6   2   24.34    2.73
  23  -6   2   20.82    2.81
  24   6   2   80.78    4.48
  24  -6   2   74.11    4.55
  24  -6   2   80.90    5.13
  24  -6   2   83.78    4.62
  25  -6   2   30.36    2.59
  25  -6   2   29.02    3.00
  25  -6   2   23.50    2.36
  25   6   2   34.36    2.53
  26  -6   2   49.28    3.42
  26   6   2   43.49    2.82
  26  -6   2   47.93    2.96
  27  -6   2   77.08    4.22
  27   6   2   73.87    3.66
  27  -6   2   74.88    3.73
  28  -6   2    1.73    1.42
 -28   6  -2    0.87    1.39
 -28  -6  -2    2.49    0.90
  28   6   2    2.68    1.12
  29  -6   2   18.18    1.45
 -29   6  -2   18.09    1.49
 -30   7   2   43.35    2.54
  30  -7  -2   49.18    2.65
  29   7  -2   91.87    4.09
  29  -7  -2   85.62    4.25
 -29   7   2   81.75    4.14
  28  -7  -2   31.37    2.55
 -28   7   2   31.95    2.80
  28  -7  -2   38.72    2.93
 -27  -7   2    9.88    1.66
  27  -7  -2   16.47    2.42
  27  -7  -2   14.41    2.32
 -27   7   2   17.76    2.46
  26  -7  -2   95.77    5.39
 -26  -7   2   90.60    4.86
 -26   7   2   92.44    5.40
  26  -7  -2   95.26    5.56
 -25  -7   2    3.21    1.86
  25  -7  -2   -2.48    2.67
  24  -7  -2    7.89    2.07
  24  -7  -2   11.25    2.85
  23  -7  -2   58.90    3.88
  23  -7  -2   57.25    4.70
  22  -7  -2   63.54    4.79
  22  -7  -2   54.32    3.92
  21  -7  -2  120.94    7.17
  21  -7  -2  120.65    6.35
  20  -7  -2   19.59    3.43
  20  -7  -2   18.31    2.64
 -19  -7   2    8.78    2.15
  19  -7  -2    6.74    2.19
  19  -7  -2    6.63    3.12
 -18  -7   2    7.46    2.85
  18  -7  -2    5.33    2.88
 -18  -7   2    5.88    2.03
  18  -7  -2    6.73    2.18
  17  -7  -2  326.46   15.70
 -17  -7   2  357.57   15.03
 -17  -7   2  343.96   15.65
  16  -7  -2   54.08    4.60
 -16  -7   2   61.23    3.80
  16  -7  -2   57.97    3.60
 -16  -7   2   53.64    4.57
  15  -7  -2  427.29   19.50
  15  -7  -2  446.22   18.85
 -15  -7   2  467.84   18.87
 -15  -7   2  442.92   19.49
 -14  -7   2    2.97    1.58
  14  -7  -2    4.76    1.65
 -13  -7   2   23.69    2.25
  13  -7  -2   26.01    2.49
 -12  -7   2  368.20   15.29
  12  -7  -2  364.81   15.69
 -11  -7   2  969.87   38.99
  11  -7  -2  995.08   39.56
  10  -7  -2  153.07    7.42
 -10  -7   2  149.13    6.72
 -10  -7   2  164.07    7.40
  -9  -7   2  418.05   16.83
  -9  -7   2  447.77   17.57
  -8  -7   2   14.26    1.21
   8  -7  -2   14.04    2.46
  -8  -7   2   15.96    2.20
   7  -7  -2  628.13   26.93
  -7  -7   2  662.08   26.85
  -7  -7   2  668.00   26.08
  -6  -7   2  529.69   21.18
  -6  -7   2  511.05   20.27
  -5  -7   2  463.25   19.12
  -4  -7   2  260.68   11.57
   4  -7  -2  276.56   11.66
   3  -7  -2  123.76    5.67
  -3  -7   2  102.46    5.58
  -2  -7   2  369.44   15.60
   2  -7  -2  371.85   15.49
  -1  -7   2  517.12   21.74
   1  -7  -2  544.80   21.72
   0  -7  -2  651.37   26.38
  -1  -7  -2  179.12    7.98
  -2  -7  -2  434.06   18.20
   2  -7   2  455.00   18.54
  -3  -7  -2  488.66   19.76
   3  -7   2  475.09   20.05
  -4  -7  -2    2.47    0.69
   4  -7   2    1.49    2.01
  -4  -7  -2    1.33    1.54
   5  -7   2  155.90    7.38
  -5  -7  -2  148.35    6.91
  -5  -7  -2  152.97    6.41
  -6  -7  -2  406.24   16.70
   6  -7   2  410.61   17.11
  -6  -7  -2  400.02   16.36
   7  -7   2   68.63    4.02
  -7  -7  -2   65.80    3.61
  -7  -7  -2   63.26    3.39
   8  -7   2  320.06   13.78
  -8  -7  -2  322.69   13.37
  -8  -7  -2  318.03   13.47
  -9  -7  -2   54.11    3.17
   9  -7   2   51.00    3.46
  -9  -7  -2   58.24    3.34
 -10  -7  -2  113.16    5.70
 -10  -7  -2  112.50    5.58
  10  -7   2  129.27    5.96
  11  -7   2   25.06    2.31
 -11  -7  -2   32.61    2.55
  12  -7   2   14.96    1.81
 -12  -7  -2   13.32    2.02
  13   7   2    3.35    2.73
 -13  -7  -2    4.64    2.57
 -13  -7  -2    6.10    1.88
  14   7   2  635.00   25.87
 -14  -7  -2  587.28   25.69
  14   7   2  586.51   25.15
 -14  -7  -2  613.76   25.02
 -15  -7  -2    2.36    2.78
  15   7   2    2.06    3.04
 -15  -7  -2    4.72    1.86
  15   7   2    2.89    2.04
  16   7   2  335.39   14.75
 -16  -7  -2  310.11   13.81
  16   7   2  319.78   13.98
 -16  -7  -2  293.27   14.48
  17   7   2   14.39    3.56
  17  -7   2   13.87    2.43
 -17  -7  -2   14.15    2.35
 -17  -7  -2   19.36    3.55
  17   7   2   14.82    2.46
  18   7   2  165.02    8.21
  18   7   2  169.31    9.08
  18  -7   2  167.58    8.10
  18  -7   2  169.33    8.93
 -18  -7  -2  164.62    8.91
 -19  -7  -2   42.34    4.24
  19   7   2   42.67    4.38
  19  -7   2   38.98    3.27
  19  -7   2   41.08    4.19
  19   7   2   42.48    3.36
  19  -7   2   41.45    3.98
  20  -7   2  485.11   20.83
  20  -7   2  475.95   20.17
  20  -7   2  473.00   20.92
  20   7   2  506.71   21.09
 -20  -7  -2  482.31   20.92
  20   7   2  462.91   20.14
  21  -7   2   32.88    3.63
  21  -7   2   24.18    2.76
  21   7   2   28.47    2.79
  21   7   2   35.99    3.99
  21  -7   2   33.12    3.51
  22   7   2   27.19    2.69
  22  -7   2   36.04    3.41
  22  -7   2   27.16    2.76
  22  -7   2   38.07    3.75
  23  -7   2   61.23    3.75
  23  -7   2   56.30    4.13
  23   7   2   61.52    3.63
  23  -7   2   59.47    4.49
  24  -7   2  187.30    8.03
  24  -7   2  162.64    8.12
  24  -7   2  174.98    8.59
  25  -7   2   64.76    3.46
  25  -7   2   55.43    3.51
  25  -7   2   67.17    4.16
  26  -7   2  137.14    6.67
 -27   7  -2    2.32    1.47
  27  -7   2    1.92    1.58
 -28   7  -2   12.38    1.34
  28   7   2   12.29    1.27
  28  -7   2   12.70    1.52
  30   8  -2   84.23    3.72
  29  -8  -2   15.79    1.71
  29   8  -2   15.71    1.46
  28  -8  -2  158.28    7.40
 -28   8   2  172.52    7.54
  28  -8  -2  171.94    7.66
  27  -8  -2   43.82    3.26
 -27   8   2   39.14    3.05
  27  -8  -2   42.64    3.08
  26  -8  -2   20.74    2.68
 -26   8   2   20.84    2.58
  26  -8  -2   19.55    2.74
 -25   8   2   50.02    3.86
  25  -8  -2   53.04    4.09
  25  -8  -2   49.87    3.96
  24  -8  -2  160.76    7.99
  24  -8  -2  149.03    7.95
 -24   8   2  143.20    7.78
  23  -8  -2   13.80    3.14
  22  -8  -2   97.09    6.25
  21  -8  -2  167.73    9.00
  20  -8  -2    9.39    3.18
 -19  -8   2  551.87   23.36
  19  -8  -2  525.27   23.49
  18  -8  -2   46.46    4.54
 -18  -8   2   47.25    4.45
  17  -8  -2   54.20    4.78
 -17  -8   2   51.73    4.56
 -16  -8   2   11.26    2.91
  16  -8  -2   10.56    1.92
  16  -8  -2   10.72    3.21
  15  -8  -2  466.02   20.48
  15  -8  -2  518.98   21.39
 -15  -8   2  491.85   21.13
  14  -8  -2  124.21    6.99
  14  -8  -2  127.41    6.40
 -14  -8   2  113.99    6.78
  13  -8  -2 1185.08   47.37
  13  -8  -2 1147.53   46.95
  12  -8  -2  111.26    6.02
  11  -8  -2   18.30    2.36
  10  -8  -2    7.25    2.05
 -10  -8   2    6.69    1.96
  -9  -8   2 2245.30   85.51
   9  -8  -2 2066.09   85.54
  -8  -8   2  213.41    9.78
   8  -8  -2  218.06    9.94
  -7  -8   2 1685.26   66.25
   7  -8  -2 1644.88   66.37
  -6  -8   2  598.79   24.61
  -5  -8   2  711.08   28.94
  -4  -8   2  264.45   11.82
   4  -8  -2  278.37   11.94
   3  -8  -2 2682.41  104.94
  -3  -8   2 2637.08  104.88
   2  -8  -2  389.53   15.67
  -2  -8   2  347.88   15.59
  -1  -8   2    4.76    2.24
   1  -8  -2    5.93    1.89
   0  -8  -2    9.80    2.16
  -1  -8  -2 1969.38   77.89
   2  -8   2   61.15    4.10
  -2  -8  -2   61.75    3.83
   3  -8   2  507.34   21.54
  -3  -8  -2  520.06   21.17
  -4  -8  -2  111.50    5.60
   4  -8   2  117.98    6.18
  -5  -8  -2  868.92   34.33
   5  -8   2  829.51   34.73
   6  -8   2  152.96    7.60
  -6  -8  -2  153.98    7.14
  -7  -8  -2  750.86   29.88
   7  -8   2  719.87   30.27
   8  -8   2    2.30    1.82
  -8  -8  -2    3.99    1.57
   9  -8   2    6.57    1.91
  -9  -8  -2    8.04    1.68
 -10  -8  -2  262.86   11.55
  10  -8   2  270.87   11.89
  11  -8   2   84.82    4.74
  12  -8   2  852.30   35.62
  12  -8   2  830.00   34.70
 -12  -8  -2  807.94   35.37
  12   8   2  960.49   35.86
  12   8   2  866.95   35.49
  13  -8   2    6.71    2.94
 -13  -8  -2    4.13    2.94
  13   8   2    8.12    3.02
  14  -8   2   58.09    4.78
  14   8   2   57.47    4.79
 -14  -8  -2   44.37    4.35
 -15  -8  -2    5.34    2.94
  15  -8   2    4.82    3.04
  15   8   2    8.46    3.46
  16   8   2 1227.14   47.86
  16   8   2 1139.28   46.99
 -16  -8  -2 1144.86   47.76
  16  -8   2 1159.64   47.84
  17  -8   2   33.90    4.03
 -17  -8  -2   35.76    4.10
  17   8   2   32.64    4.21
  17   8   2   29.67    3.01
  18   8   2  487.96   21.34
 -18  -8  -2  497.25   22.20
  18  -8   2  517.24   22.26
  18   8   2  550.51   22.42
  19   8   2   37.64    4.22
 -19  -8  -2   33.54    4.06
  19  -8   2   40.69    4.07
  19   8   2   30.49    2.99
 -20  -8  -2  139.92    7.63
  20  -8   2  133.56    7.49
  20   8   2  130.58    6.63
  21  -8   2   81.94    5.34
  22  -8   2  809.88   33.31
  23  -8   2  154.57    7.70
  23  -8   2  144.68    7.37
  24  -8   2  104.98    5.67
  24  -8   2   98.23    5.24
  25  -8   2    4.02    2.03
  25  -8   2    4.27    1.52
 -25   8  -2    3.43    1.61
  26  -8   2  199.22    8.35
 -26   8  -2  172.50    7.96
  27  -8   2   26.51    2.04
 -27   8  -2   21.65    1.64
  28  -8   2   86.29    4.02
  28   8   2   90.33    3.92
  29  -9  -2   69.09    3.41
  29   9  -2   73.22    3.30
  28  -9  -2   19.43    1.78
 -28   9   2   19.61    1.66
  27  -9  -2    0.98    1.67
  27  -9  -2    0.83    1.77
 -27   9   2    1.74    1.52
  26  -9  -2    8.13    2.16
 -26   9   2    7.10    1.88
  26  -9  -2    5.89    2.08
  25  -9  -2   62.44    4.14
  25  -9  -2   64.73    4.13
  24  -9  -2  131.57    6.93
 -24   9   2  125.05    6.67
  24  -9  -2  125.07    6.91
  23  -9  -2  211.25   10.05
  23  -9  -2  200.53   10.06
 -23   9   2  199.16    9.76
  22  -9  -2  108.92    6.58
 -22   9   2  107.91    6.34
  22  -9  -2  108.98    6.60
  21  -9  -2   10.02    3.29
  21  -9  -2   11.89    3.34
 -20   9   2   67.79    5.14
  20  -9  -2   77.48    5.59
 -19   9   2  201.53   10.43
 -19  -9   2  208.51   10.42
  19  -9  -2  215.73   10.83
 -18  -9   2  147.72    8.05
  18  -9  -2  138.29    8.22
 -18   9   2  143.56    7.92
 -17  -9   2  210.01   10.43
  17  -9  -2  199.48   10.65
 -16  -9   2   47.23    4.42
  16  -9  -2   48.10    4.58
  16  -9  -2   49.43    3.56
 -15  -9   2    6.73    2.80
  15  -9  -2    4.54    3.13
 -15   9   2    4.03    2.50
  15  -9  -2    6.42    1.94
  14  -9  -2   11.67    3.04
 -14   9   2   12.04    2.64
 -14  -9   2   12.81    3.01
  14  -9  -2    6.17    2.10
  13  -9  -2  122.26    6.69
  13  -9  -2  109.29    6.16
 -13  -9   2  107.25    6.42
  12  -9  -2  248.50   11.44
  12  -9  -2  270.28   11.79
  11  -9  -2  243.73   11.30
  10  -9  -2   32.60    3.16
 -10  -9   2   33.57    2.99
   9  -9  -2   19.80    2.66
  -9  -9   2   22.14    2.59
   8  -9  -2    1.17    1.98
  -8  -9   2    0.23    1.73
   7  -9  -2  144.20    7.30
  -7  -9   2  138.42    6.98
  -6  -9   2  218.02    9.98
  -5  -9   2  499.72   20.91
  -4  -9   2  189.30    8.94
   4  -9  -2  193.56    9.12
  -3  -9   2    2.08    1.98
   3  -9  -2    2.62    1.94
  -2  -9   2  158.09    7.75
   2  -9  -2  158.09    7.66
  -1  -9   2  718.92   29.71
   1  -9  -2  725.27   29.55
   0  -9  -2  428.50   18.09
  -1  -9  -2  483.55   20.19
   2  -9   2  311.19   13.93
  -2  -9  -2  313.37   13.52
  -3  -9  -2   28.38    2.65
   3  -9   2   31.73    3.24
  -4  -9  -2    9.67    1.94
   4  -9   2   13.56    2.71
  -5  -9  -2  358.38   14.84
   5  -9   2  329.79   15.26
   6  -9   2  511.35   21.33
  -6  -9  -2  491.82   20.75
   7  -9   2  373.36   16.46
  -7  -9  -2  378.93   15.98
  -8  -9  -2  413.85   17.60
   8  -9   2  424.40   18.10
  -9  -9  -2   67.23    4.07
   9  -9   2   77.08    4.65
 -10  -9  -2    1.03    2.52
  10  -9   2    8.69    2.10
  10  -9   2    0.50    2.68
  11  -9   2   70.29    5.32
  11   9   2   71.64    4.90
  11  -9   2   67.92    4.33
  12  -9   2  175.83    9.43
  12   9   2  168.24    9.02
  12  -9   2  179.04    8.41
  13  -9   2  372.93   17.37
  13   9   2  385.53   17.10
  14  -9   2  451.48   20.13
  14   9   2  443.63   19.77
  15   9   2  111.18    6.74
 -15  -9  -2   93.48    6.54
  15  -9   2  111.18    6.97
  16   9   2    5.33    3.11
  16  -9   2    4.51    3.24
 -16  -9  -2    5.15    3.14
  17   9   2   20.52    3.81
  17  -9   2   14.91    3.52
 -17  -9  -2   18.98    3.69
 -18  -9  -2  222.18   11.11
  18  -9   2  222.38   11.16
  19  -9   2  120.78    7.10
 -19  -9  -2  118.77    7.07
 -20  -9  -2   75.84    5.39
  20  -9   2   80.25    5.39
  21  -9   2   49.89    4.12
  22  -9   2    4.82    2.34
  23  -9   2   21.47    2.50
 -23   9  -2   16.30    2.10
 -24   9  -2   78.23    4.19
  24  -9   2   84.58    4.43
 -25   9  -2   28.60    2.11
  25  -9   2   30.20    2.17
  26  -9   2   11.85    1.70
  27  -9   2    8.55    1.24
  28 -10  -2    2.48    1.04
  28  10  -2    3.57    0.87
  27 -10  -2  158.62    5.88
  27 -10  -2  171.50    6.05
  26 -10  -2  222.47    9.31
  26 -10  -2  241.44    9.44
  25 -10  -2   19.40    2.48
  25 -10  -2   17.74    2.54
 -25  10   2   15.89    2.04
  24 -10  -2  201.34    9.29
 -24  10   2  181.14    8.84
  24 -10  -2  206.04    9.33
  23 -10  -2  202.27    9.57
  23 -10  -2  214.73    9.62
 -22  10   2  144.16    7.88
  22 -10  -2  158.25    8.34
 -21  10   2  427.55   19.43
  21 -10  -2  484.66   20.00
  20 -10  -2  672.87   28.69
 -20  10   2  674.49   28.32
 -19  10   2    8.45    2.89
 -19 -10   2   11.74    3.12
  19 -10  -2   10.69    3.41
 -18 -10   2   13.71    3.10
 -18  10   2    7.50    2.87
  18 -10  -2    7.88    3.38
  17 -10  -2  416.47   18.70
  17 -10  -2  412.45   18.47
 -17 -10   2  391.74   18.00
 -17  10   2  405.58   18.06
  16 -10  -2  371.34   17.12
 -16 -10   2  356.34   16.42
 -16  10   2  359.10   16.35
  16 -10  -2  368.84   16.86
  15 -10  -2  155.41    8.17
  15 -10  -2  172.87    9.12
  15 -10  -2  172.86    9.46
 -15 -10   2  163.89    8.75
 -14 -10   2  751.16   33.12
  14 -10  -2  807.12   32.97
  14 -10  -2  807.22   33.85
  14 -10  -2  822.35   33.52
 -13 -10   2   62.60    4.66
  13 -10  -2   63.59    4.98
  13 -10  -2   70.60    5.56
  13 -10  -2   68.61    4.56
 -13 -10   2   60.54    4.72
 -12 -10   2    5.30    2.48
  12 -10  -2    5.72    2.33
 -12 -10   2    4.08    2.60
  12 -10  -2    4.05    2.78
  12 -10  -2    9.24    3.22
  11 -10  -2  180.76    9.17
 -11 -10   2  174.23    9.18
  11 -10  -2  196.93    9.36
  11 -10  -2  196.10    9.65
 -11 -10   2  173.22    9.19
 -10 -10   2  307.02   15.09
  10 -10  -2  326.03   15.25
  10 -10  -2  375.80   15.45
 -10 -10   2  339.97   15.36
 -10 -10   2  345.83   15.13
  10 -10  -2  363.33   15.66
   9 -10  -2    7.60    2.39
   9 -10  -2    7.89    2.64
   9 -10  -2    7.39    2.49
  -9 -10   2    7.93    2.18
  -9 -10   2    7.76    2.56
   8 -10  -2  190.74    9.65
  -8 -10   2  202.84    9.44
   7 -10  -2    2.94    2.35
  -7 -10   2    3.21    1.86
  -6 -10   2   14.32    2.36
  -5 -10   2  399.84   17.27
   4 -10  -2  224.46   10.76
  -4 -10   2  236.86   10.72
   3 -10  -2   19.90    2.85
  -3 -10   2   20.97    2.80
   2 -10  -2  142.53    7.25
  -2 -10   2  143.17    7.47
   1 -10  -2  783.19   32.73
  -1 -10   2  816.46   32.96
   0 -10  -2    9.25    2.15
  -1 -10  -2 1100.70   44.47
  -2 -10  -2  549.14   23.33
   2 -10   2  573.60   23.85
   3 -10   2  152.86    8.09
  -3 -10  -2  155.77    7.59
  -4 -10  -2  388.75   16.86
   4 -10   2  402.64   17.49
  -5 -10  -2 1725.49   68.99
   5 -10   2 1739.48   69.58
  -6 -10  -2    2.72    1.74
   6 -10   2    1.25    2.34
  -7 -10  -2  129.59    6.66
  -7 -10  -2  125.57    6.99
   7 -10   2  132.58    7.38
   7 -10   2  139.48    7.35
   7 -10   2  141.83    7.11
   8 -10   2  556.04   22.72
  -8 -10  -2  524.61   22.58
  -8 -10  -2  519.05   22.17
   8 -10   2  531.17   22.75
  -9 -10  -2  861.30   35.32
   9 -10   2  867.51   36.02
  -9 -10  -2  862.92   35.84
   9 -10   2  865.49   35.81
   9 -10   2  886.53   35.91
  10 -10   2  271.49   12.85
  10 -10   2  277.69   12.52
 -10 -10  -2  266.84   12.78
  10 -10   2  269.96   12.72
  11 -10   2 1128.25   46.07
  11 -10   2 1184.12   46.44
  11 -10   2 1083.44   45.80
  11 -10   2 1164.35   46.71
 -11 -10  -2 1113.44   46.26
  12 -10   2   71.34    5.68
  12 -10   2   62.55    5.13
 -12 -10  -2   62.70    5.09
  13 -10   2    7.21    3.33
  13 -10   2   12.04    3.48
  14 -10   2  292.50   14.25
  15 -10   2  874.91   36.88
  16 -10   2    2.42    3.38
 -17 -10  -2  228.93   11.81
  17 -10   2  259.28   12.29
 -18 -10  -2  303.45   14.11
  18 -10   2  299.90   14.26
  19 -10   2   39.87    4.25
 -19 -10  -2   55.35    4.43
 -20 -10  -2   27.18    3.37
  20 -10   2   25.53    3.39
  21 -10   2  187.27    9.16
  22 -10   2    4.92    2.22
  23 -10   2   84.69    4.67
  24 -10   2    2.91    1.43
  26 -10   2    5.55    1.22
  27  11  -2   13.17    1.17
  27 -11  -2   16.85    1.43
  26 -11  -2   29.24    2.27
  26 -11  -2   29.28    2.28
  25 -11  -2  192.99    8.84
  25 -11  -2  200.72    8.86
  24 -11  -2  115.59    5.54
  24 -11  -2  104.41    5.48
  23 -11  -2   50.28    3.82
  23 -11  -2   50.49    3.80
 -23  11   2   40.25    3.08
  22 -11  -2  348.26   14.07
 -22  11   2  283.64   13.29
  21 -11  -2  141.47    7.53
 -21  11   2  130.49    6.86
  20 -11  -2    6.92    3.09
 -20  11   2    7.48    2.40
 -19  11   2  284.62   13.07
  19 -11  -2  286.73   13.62
  18 -11  -2  241.03   11.99
 -18 -11   2  222.72   11.22
  18 -11  -2  245.30   11.92
 -17 -11   2   24.88    3.47
  17 -11  -2   22.58    4.02
  17 -11  -2   30.83    4.35
  16 -11  -2  219.24   11.76
  16 -11  -2  215.97   11.44
 -16 -11   2  238.47   11.16
  15 -11  -2  105.24    5.94
  15 -11  -2  104.90    6.84
  15 -11  -2  103.83    7.33
 -15 -11   2   97.68    6.35
  14 -11  -2    6.95    3.34
  14 -11  -2    9.09    4.07
 -14 -11   2    4.06    2.81
  14 -11  -2    6.40    2.35
 -13 -11   2  206.05   10.36
  13 -11  -2  206.25   11.03
  13 -11  -2  219.21   10.34
  13 -11  -2  223.99   10.74
 -13 -11   2  190.09   10.32
 -12 -11   2  254.09   12.21
  12 -11  -2  245.47   12.12
  12 -11  -2  273.16   12.49
  12 -11  -2  263.26   12.84
 -12 -11   2  247.32   12.19
 -11 -11   2    6.61    2.78
  11 -11  -2    3.63    3.09
  11 -11  -2    4.19    2.46
  11 -11  -2    4.08    2.75
 -11 -11   2    7.69    2.78
 -10 -11   2   56.98    4.78
 -10 -11   2   66.30    4.55
  10 -11  -2   62.51    4.65
  10 -11  -2   59.11    4.76
 -10 -11   2   63.88    4.70
  10 -11  -2   59.56    4.99
  -9 -11   2   54.68    4.49
  -9 -11   2   56.89    4.21
   9 -11  -2   61.67    4.90
   9 -11  -2   60.04    4.39
   9 -11  -2   55.97    4.50
  -9 -11   2   47.62    4.18
   8 -11  -2   69.48    5.23
   8 -11  -2   80.68    5.10
   8 -11  -2   87.07    5.39
  -8 -11   2   75.58    4.94
  -8 -11   2   73.47    4.99
  -8 -11   2   72.00    5.22
  -7 -11   2    6.96    2.40
  -7 -11   2    4.40    2.74
   7 -11  -2    6.39    2.46
  -7 -11   2    3.67    2.34
   7 -11  -2    6.45    2.36
   7 -11  -2    7.06    2.31
   6 -11  -2  192.07    9.43
   6 -11  -2  210.62    9.39
  -6 -11   2  178.69    9.26
  -6 -11   2  181.53    9.58
  -5 -11   2   43.61    3.98
   5 -11  -2   38.23    3.65
   5 -11  -2   43.66    3.49
  -5 -11   2   49.77    3.69
  -5 -11   2   42.85    3.65
  -4 -11   2   20.32    2.68
  -4 -11   2   16.59    2.52
   4 -11  -2   17.60    3.02
  -4 -11   2   21.64    3.02
   4 -11  -2   15.15    2.35
  -3 -11   2  258.32   12.12
  -3 -11   2  275.92   11.88
   3 -11  -2  243.40   12.02
  -3 -11   2  259.83   12.35
  -2 -11   2   14.10    3.04
   2 -11  -2   16.62    2.72
  -2 -11   2   13.78    2.67
  -2 -11   2   13.56    2.34
  -1 -11   2   27.19    2.95
  -1 -11   2   25.13    3.14
  -1 -11   2   26.34    3.62
   1 -11  -2   28.99    2.96
   0 -11  -2  141.80    7.79
   0 -11   2  148.47    7.44
   0 -11  -2  146.43    7.56
   1 -11   2  792.65   33.14
   1 -11   2  785.74   32.50
  -1 -11  -2  783.37   32.45
   1 -11   2  804.17   32.34
  -1 -11  -2  763.36   32.63
   2 -11   2   56.00    4.94
   2 -11   2   54.67    4.51
   2 -11   2   65.18    4.59
  -2 -11  -2   60.74    4.34
  -2 -11  -2   63.89    4.64
   2 -11   2   65.31    4.34
   3 -11   2 1309.20   49.91
  -3 -11  -2 1199.23   49.57
   3 -11   2 1212.74   50.65
   3 -11   2 1212.05   50.34
   3 -11   2 1286.90   50.14
  -3 -11  -2 1219.99   49.84
  -3 -11  -2 1198.28   50.00
  -4 -11  -2   87.99    5.42
  -4 -11  -2   86.89    5.14
   4 -11   2   86.29    5.27
   4 -11   2   87.69    5.60
  -4 -11  -2   85.74    5.08
   4 -11   2   82.11    6.21
   4 -11   2   79.53    5.73
   5 -11   2    3.74    2.22
   5 -11   2    6.47    2.95
  -5 -11  -2   15.20    2.61
  -5 -11  -2    8.44    2.53
  -5 -11  -2    8.52    2.08
   5 -11   2    7.15    2.56
   5 -11   2    5.37    2.89
   6 -11   2  140.32    7.22
   6 -11   2  123.01    7.34
   6 -11   2  126.68    7.78
  -6 -11  -2  122.55    6.69
   6 -11   2  141.19    7.63
  -6 -11  -2  129.63    7.07
  -6 -11  -2  127.23    7.01
  -7 -11  -2 1223.09   50.23
   7 -11   2 1261.44   50.63
   7 -11   2 1313.65   50.39
  -7 -11  -2 1216.57   49.93
   7 -11   2 1231.36   50.84
   7 -11   2 1220.89   50.54
  -7 -11  -2 1215.32   50.12
   8 -11   2    9.14    3.23
  -8 -11  -2   10.13    2.56
   8 -11   2   11.84    2.61
   8 -11   2   16.89    3.44
   8 -11   2   16.64    3.10
  -8 -11  -2    6.73    2.17
  -8 -11  -2    9.26    2.74
   9 -11   2  676.53   28.05
   9 -11   2  708.20   27.92
  -9 -11  -2  641.58   27.72
   9 -11   2  654.61   27.72
  -9 -11  -2  622.15   27.15
  10 -11   2  183.89    9.30
  10 -11   2  177.30    8.92
  10 -11   2  171.65    9.14
 -10 -11  -2  166.31    9.11
  11 -11   2  183.57    9.44
  11 -11   2  167.01    8.74
 -11 -11  -2  173.46    9.29
  11 -11   2  184.97    9.15
  12 -11   2   97.08    6.88
  12 -11   2  101.17    6.61
  12 -11   2   93.21    5.83
 -12 -11  -2   98.78    6.46
  13 -11   2  895.67   37.93
 -13 -11  -2  902.88   37.52
  13 -11   2  897.42   37.66
  14 -11   2   20.95    4.16
 -14 -11  -2   30.88    4.17
  14 -11   2   23.17    3.94
  15 -11   2  224.79   11.28
  15 -11   2  211.15   11.30
  16 -11   2  148.31    8.63
  16 -11   2  158.86    8.90
  17 -11   2   75.38    5.48
  17 -11   2   72.25    5.62
  18 -11   2    7.41    3.16
  19 -11   2  307.17   14.11
  20 -11   2   37.31    3.64
  21 -11   2   62.37    4.22
  22 -11   2    4.54    2.00
  23 -11   2    4.03    1.69
  24 -11   2    0.90    1.12
  26 -12  -2    9.20    1.16
  25 -12  -2    2.13    1.45
  25 -12  -2    4.41    1.38
  24 -12  -2    0.16    1.68
  24 -12  -2    0.75    1.66
  23 -12  -2   60.28    3.97
  23 -12  -2   57.61    3.79
  22 -12  -2   31.17    3.08
  21 -12  -2   44.50    3.83
  20 -12  -2   -0.90    2.64
  19 -12  -2    8.62    3.34
  19 -12  -2   12.89    3.26
 -18 -12   2   38.83    3.74
  18 -12  -2   31.25    4.12
  18 -12  -2   37.97    4.21
  17 -12  -2    6.69    2.36
 -17 -12   2    6.38    2.70
  17 -12  -2    8.46    3.59
  17 -12  -2    3.91    3.15
  16 -12  -2   19.24    3.69
  16 -12  -2   22.22    4.14
  16 -12  -2   27.47    3.17
 -16 -12   2   27.54    3.51
 -15 -12   2  182.10    9.48
  15 -12  -2  180.73    9.44
  15 -12  -2  197.90   10.42
  15 -12  -2  191.42    9.92
 -14 -12   2   20.76    3.43
 -14 -12   2   16.48    2.99
  14 -12  -2   17.72    3.99
  14 -12  -2   22.04    3.79
 -13 -12   2  223.70   11.06
  13 -12  -2  235.03   11.94
 -13 -12   2  225.93   11.11
  13 -12  -2  220.05   11.31
  13 -12  -2  229.79   11.09
 -12 -12   2  113.55    6.96
 -12 -12   2  129.54    7.16
  12 -12  -2  118.78    7.62
  12 -12  -2  111.94    7.06
  12 -12  -2  122.76    7.01
 -11 -12   2   46.55    4.41
  11 -12  -2   50.77    4.46
  11 -12  -2   55.14    5.22
  11 -12  -2   53.32    4.58
 -11 -12   2   52.92    4.68
  10 -12  -2   13.05    2.82
  10 -12  -2    7.28    2.94
 -10 -12   2   10.79    3.04
  10 -12  -2   12.86    3.53
 -10 -12   2   10.92    2.99
   9 -12  -2  702.21   28.52
  -9 -12   2  700.91   28.52
   9 -12  -2  676.92   28.86
   9 -12  -2  651.46   28.68
  -9 -12   2  647.12   28.40
  -9 -12   2  673.26   28.69
  -8 -12   2  149.35    8.37
   8 -12  -2  163.83    8.24
  -8 -12   2  143.30    8.02
  -8 -12   2  141.52    7.94
   8 -12  -2  158.88    8.47
   8 -12  -2  162.40    8.57
   7 -12  -2  281.08   12.76
   7 -12  -2  274.02   12.98
  -7 -12   2  270.15   13.16
  -7 -12   2  291.68   12.95
   7 -12  -2  267.08   13.19
  -7 -12   2  263.34   12.68
  -6 -12   2    3.21    2.42
  -6 -12   2    3.98    2.34
  -6 -12   2   -0.18    2.80
   6 -12  -2    2.18    2.39
   6 -12  -2    3.77    2.50
   6 -12  -2    3.83    2.76
   5 -12  -2  165.13    8.59
  -5 -12   2  161.82    9.01
  -5 -12   2  171.34    8.71
  -5 -12   2  156.16    8.31
   5 -12  -2  170.85    8.43
  -4 -12   2    8.60    2.64
  -4 -12   2    9.19    3.03
   4 -12  -2    9.20    2.70
   4 -12  -2   12.88    2.86
  -4 -12   2    3.90    2.47
   4 -12  -2    9.10    2.90
  -3 -12   2  593.33   25.41
   3 -12  -2  612.07   25.40
  -3 -12   2  618.04   25.87
   3 -12  -2  612.19   25.52
   3 -12  -2  592.14   25.77
  -3 -12   2  602.77   26.18
  -2 -12   2   27.36    3.27
  -2 -12   2   31.02    3.67
   2 -12  -2   29.27    3.27
  -2 -12   2   31.07    4.29
   2 -12  -2   26.11    3.07
   2 -12  -2   38.08    3.67
   2 -12  -2   29.85    3.99
  -2 -12   2   33.18    3.77
  -1 -12   2  144.29    7.26
  -1 -12   2  143.62    7.51
   1 -12  -2  126.60    6.93
   1 -12  -2  135.40    7.72
  -1 -12   2  129.63    7.51
   1 -12  -2  131.89    7.11
  -1 -12   2  137.14    8.01
   1 -12  -2  124.32    7.23
   0 -12   2    4.94    2.96
   0 -12  -2    2.15    2.32
   0 -12  -2    0.64    2.41
   0 -12  -2    2.05    2.29
   0 -12   2    1.13    2.37
   0 -12  -2    0.89    2.83
  -1 -12  -2   74.99    4.64
  -1 -12  -2   77.36    5.06
   1 -12   2   70.37    5.02
  -1 -12  -2   75.39    5.41
   1 -12   2   63.42    4.75
   2 -12   2   64.55    5.00
  -2 -12  -2   66.63    4.52
  -2 -12  -2   65.02    4.58
   2 -12   2   62.20    4.70
   2 -12   2   64.80    5.09
   2 -12   2   67.21    5.61
  -2 -12  -2   61.59    4.88
  -2 -12  -2   61.13    4.32
   3 -12   2  306.46   14.24
  -3 -12  -2  305.48   13.98
   3 -12   2  304.83   14.55
  -3 -12  -2  296.00   13.65
  -3 -12  -2  296.74   14.22
   3 -12   2  327.51   15.10
   3 -12   2  316.01   14.03
  -3 -12  -2  314.16   13.89
   4 -12   2   25.44    4.35
  -4 -12  -2   29.32    3.05
   4 -12   2   27.68    3.33
   4 -12   2   23.43    3.57
  -4 -12  -2   27.68    3.44
   4 -12   2   30.63    3.80
  -4 -12  -2   24.56    3.20
   5 -12   2  126.12    7.20
  -5 -12  -2  117.48    6.63
   5 -12   2  119.06    7.64
   5 -12   2  111.87    7.14
   5 -12   2  126.75    6.88
  -5 -12  -2  105.80    6.34
  -5 -12  -2  117.61    6.79
  -6 -12  -2    1.76    2.39
  -6 -12  -2    1.45    1.90
   6 -12   2    4.41    2.78
   6 -12   2    3.25    3.17
   6 -12   2    2.36    2.51
  -6 -12  -2    2.31    2.48
   6 -12   2    1.81    3.01
   7 -12   2    0.97    2.49
   7 -12   2    3.47    2.49
  -7 -12  -2    3.42    2.11
  -7 -12  -2    4.07    2.55
   7 -12   2    5.63    3.32
   7 -12   2    1.27    3.03
  -7 -12  -2    3.86    2.67
   8 -12   2   14.23    3.11
   8 -12   2   11.68    3.69
  -8 -12  -2   13.27    2.38
   8 -12   2   16.21    3.82
   8 -12   2   16.25    3.09
  -8 -12  -2   13.78    2.92
  -8 -12  -2   17.22    3.25
   9 -12   2   93.59    6.05
   9 -12   2   96.67    6.60
   9 -12   2   88.26    6.24
  -9 -12  -2   98.57    6.17
   9 -12   2   78.54    5.54
 -10 -12  -2   20.56    3.51
  10 -12   2   27.67    3.75
  10 -12   2   22.29    2.98
  10 -12   2   24.11    3.73
 -11 -12  -2   97.11    6.54
  11 -12   2  101.60    6.31
  11 -12   2  102.53    6.55
 -12 -12  -2    6.08    3.25
  12 -12   2    6.49    2.55
  12 -12   2    7.23    3.16
 -13 -12  -2   57.37    4.96
  13 -12   2   57.75    5.10
  14 -12   2    3.81    3.70
 -14 -12  -2    1.44    3.03
  14 -12   2    0.58    3.16
  15 -12   2    4.26    3.46
  15 -12   2    4.31    3.26
 -15 -12  -2    5.53    2.95
  16 -12   2   24.12    3.88
  16 -12   2   20.39    3.61
 -16 -12  -2   24.22    3.64
  17 -12   2  164.91    9.03
  17 -12   2  182.93    9.30
  18 -12   2   15.62    3.13
  18 -12   2   18.68    3.27
  19 -12   2   59.42    4.42
  19 -12   2   53.54    4.24
  20 -12   2   50.20    3.84
  21 -12   2   14.28    2.30
  22 -12   2  136.80    6.47
  23 -12   2  105.64    4.92
  24 -13  -2   14.72    1.68
  24 -13  -2   11.28    1.51
  23 -13  -2    4.72    1.64
  22 -13  -2   32.27    2.85
  21 -13  -2    2.95    2.21
  20 -13  -2   79.31    4.95
  20 -13  -2   75.69    5.09
  19 -13  -2   20.09    3.27
  19 -13  -2   17.60    2.95
  18 -13  -2   81.11    5.46
  18 -13  -2   76.05    5.59
  17 -13  -2  141.37    8.20
 -17 -13   2  159.15    7.87
  17 -13  -2  150.71    8.52
  17 -13  -2  152.68    7.55
 -16 -13   2    5.45    2.55
  16 -13  -2    7.13    3.69
  16 -13  -2    5.32    3.04
  16 -13  -2    6.61    2.37
  15 -13  -2   83.16    6.43
  15 -13  -2   84.53    6.15
  15 -13  -2   91.75    5.67
 -15 -13   2   91.48    5.63
  14 -13  -2  320.40   14.38
  14 -13  -2  290.35   14.44
  14 -13  -2  307.57   14.92
 -14 -13   2  300.21   13.94
 -14 -13   2  316.60   14.18
 -13 -13   2  293.60   13.66
  13 -13  -2  300.30   14.40
 -13 -13   2  286.79   13.58
  13 -13  -2  287.78   13.89
  13 -13  -2  299.88   14.03
 -12 -13   2  240.79   11.58
  12 -13  -2  251.38   12.20
  12 -13  -2  239.10   12.26
  12 -13  -2  237.79   11.82
 -12 -13   2  229.40   11.60
  11 -13  -2 1099.78   43.93
  11 -13  -2 1057.89   43.30
  11 -13  -2 1027.75   43.61
 -11 -13   2 1069.80   43.38
 -11 -13   2 1008.37   43.07
  10 -13  -2   66.61    5.19
 -10 -13   2   61.20    5.15
  10 -13  -2   69.66    5.67
  10 -13  -2   63.39    5.00
  10 -13  -2   74.42    5.88
 -10 -13   2   63.29    4.94
   9 -13  -2   36.80    4.28
   9 -13  -2   43.09    4.57
  -9 -13   2   47.94    4.56
   9 -13  -2   53.41    4.46
  -9 -13   2   45.92    3.90
   9 -13  -2   45.74    5.10
  -9 -13   2   46.09    4.29
   8 -13  -2  130.71    7.63
   8 -13  -2  122.32    7.29
  -8 -13   2  124.55    7.21
  -8 -13   2  119.52    7.19
   8 -13  -2  129.46    7.69
   8 -13  -2  129.07    8.16
  -8 -13   2  129.57    7.65
   7 -13  -2 1221.94   51.53
   7 -13  -2 1321.24   52.05
   7 -13  -2 1220.48   51.19
  -7 -13   2 1267.48   51.24
   7 -13  -2 1302.35   51.11
  -7 -13   2 1245.27   51.48
  -7 -13   2 1213.96   50.93
   6 -13  -2   11.97    3.44
   6 -13  -2   18.60    3.73
  -6 -13   2   23.42    3.31
  -6 -13   2   19.63    3.73
  -6 -13   2   20.03    3.32
   6 -13  -2   16.46    3.10
  -5 -13   2 1057.09   44.53
   5 -13  -2 1128.48   44.03
  -5 -13   2 1018.53   44.16
   5 -13  -2 1086.53   44.10
  -4 -13   2   12.42    3.55
   4 -13  -2    8.53    2.87
   4 -13  -2    8.98    3.35
   4 -13  -2    6.12    2.92
  -4 -13   2   11.31    2.62
  -4 -13   2    6.85    2.72
   4 -13  -2    7.95    2.59
  -3 -13   2  128.59    7.93
   3 -13  -2  136.45    7.37
  -3 -13   2  131.18    7.55
   3 -13  -2  131.88    7.24
   3 -13  -2  126.61    7.94
  -3 -13   2  129.94    7.23
   3 -13  -2  127.30    7.55
   2 -13  -2   97.55    6.72
   2 -13  -2   92.12    6.20
   2 -13  -2   91.18    5.79
  -2 -13   2   93.19    5.88
  -2 -13   2   99.88    6.94
   2 -13  -2   89.95    5.77
  -2 -13   2   99.86    6.40
  -1 -13   2 1245.12   50.86
   1 -13  -2 1220.00   50.53
   1 -13  -2 1240.26   49.85
   1 -13  -2 1185.33   50.20
   1 -13  -2 1238.94   49.83
  -1 -13   2 1225.99   50.48
  -1 -13   2 1270.75   50.05
  -1 -13   2 1202.04   50.08
   0 -13  -2   92.99    5.67
   0 -13  -2   79.15    5.40
   0 -13  -2   96.93    6.59
   0 -13   2   85.26    5.71
   0 -13   2   83.01    5.80
   0 -13  -2   95.70    5.99
   1 -13   2  308.68   14.02
  -1 -13  -2  297.00   13.73
  -1 -13  -2  288.23   14.04
   1 -13   2  317.62   14.28
  -1 -13  -2  306.31   14.55
  -1 -13  -2  307.17   13.75
  -2 -13  -2   44.49    3.86
  -2 -13  -2   45.20    4.72
  -2 -13  -2   39.46    3.85
   2 -13   2   47.97    4.46
  -2 -13  -2   48.38    4.16
   2 -13   2   37.81    3.99
   2 -13   2   40.21    4.52
   2 -13   2   45.06    5.33
   3 -13   2  259.39   12.89
  -3 -13  -2  266.05   12.27
  -3 -13  -2  241.73   11.67
  -3 -13  -2  249.39   11.82
   3 -13   2  247.28   11.90
   3 -13   2  244.09   12.12
   3 -13   2  228.56   12.21
  -4 -13  -2   27.25    3.31
   4 -13   2   26.32    3.76
  -4 -13  -2   31.08    3.86
   4 -13   2   27.20    4.02
   4 -13   2   28.33    4.60
  -4 -13  -2   28.31    3.38
   4 -13   2   27.99    3.61
   5 -13   2  295.86   14.85
  -5 -13  -2  302.06   13.87
   5 -13   2  309.11   14.14
   5 -13   2  268.96   14.27
  -5 -13  -2  320.26   14.09
   5 -13   2  317.55   14.49
  -5 -13  -2  305.76   14.19
  -6 -13  -2  358.80   16.08
  -6 -13  -2  355.20   15.99
  -6 -13  -2  343.97   15.72
   6 -13   2  347.96   16.39
   6 -13   2  353.62   16.42
   6 -13   2  362.75   16.09
   6 -13   2  342.30   16.70
   7 -13   2    5.00    2.97
   7 -13   2    2.86    2.48
   7 -13   2    5.76    3.32
   7 -13   2    8.23    3.37
  -7 -13  -2    2.68    2.59
  -7 -13  -2    3.77    2.87
  -7 -13  -2    4.15    2.22
  -8 -13  -2   33.20    3.80
  -8 -13  -2   31.32    3.50
   8 -13   2   33.48    4.26
   8 -13   2   32.71    3.94
   8 -13   2   24.78    4.20
   8 -13   2   33.78    3.83
  -9 -13  -2   32.16    3.45
   9 -13   2   24.61    3.24
   9 -13   2   27.87    3.81
   9 -13   2   32.03    4.07
   9 -13   2   30.90    4.28
  -9 -13  -2   27.52    3.85
  10 -13   2   39.46    4.24
  10 -13   2   46.79    5.01
 -10 -13  -2   32.71    4.29
  10 -13   2   43.08    4.32
  11 -13   2    4.10    3.04
  11 -13   2    5.63    3.90
 -11 -13  -2    6.56    3.25
  11 -13   2    5.33    2.73
 -12 -13  -2    6.11    3.23
  12 -13   2   12.54    3.36
  12 -13   2    7.87    2.72
  13 -13   2    6.87    3.23
 -13 -13  -2    9.08    3.12
 -14 -13  -2   13.71    3.26
  14 -13   2   15.93    3.58
  15 -13   2  121.16    7.59
 -15 -13  -2  124.13    7.14
  15 -13   2  129.73    7.42
 -16 -13  -2   16.39    3.01
  16 -13   2   14.97    3.29
  16 -13   2   16.60    3.50
  17 -13   2   94.53    6.00
  17 -13   2   90.40    5.89
 -17 -13  -2  100.61    5.74
  18 -13   2   78.51    5.07
  18 -13   2   76.92    5.14
 -18 -13  -2   82.42    4.94
  19 -13   2   16.23    2.61
  19 -13   2   20.41    2.87
  20 -13   2  131.86    6.59
  20 -13   2  136.40    6.69
  21 -13   2  123.79    5.99
  21 -13   2  125.76    6.03
  22 -13   2   55.52    3.04
  23 -14  -2   11.21    1.31
  22 -14  -2   42.61    2.62
 -22  14   2   34.53    1.98
  21 -14  -2   12.80    2.05
  21 -14  -2   13.16    2.23
  20 -14  -2   16.81    2.60
  20 -14  -2   11.72    2.29
  19 -14  -2    0.88    2.39
  19 -14  -2    3.39    2.19
  18 -14  -2    9.58    2.68
  18 -14  -2    5.16    2.80
  17 -14  -2   45.80    3.25
  17 -14  -2   46.57    4.15
  17 -14  -2   46.09    4.41
  16 -14  -2   96.80    6.50
  16 -14  -2   98.46    5.58
 -16 -14   2  100.33    5.69
  16 -14  -2  103.67    6.27
  15 -14  -2  139.04    8.20
  15 -14  -2  137.05    7.83
  15 -14  -2  135.42    7.40
 -15 -14   2  149.99    7.42
 -14 -14   2  152.96    8.03
 -14 -14   2  168.39    8.21
  14 -14  -2  141.86    8.46
  14 -14  -2  166.63    9.12
  14 -14  -2  169.74    8.57
  13 -14  -2   24.63    3.65
  13 -14  -2   19.25    3.50
 -13 -14   2   23.29    3.10
 -13 -14   2   19.20    3.05
  13 -14  -2   20.95    4.03
  12 -14  -2   13.10    3.53
 -12 -14   2   15.22    3.18
  12 -14  -2   11.94    3.82
  12 -14  -2   21.93    3.54
 -12 -14   2   12.80    3.00
  11 -14  -2   93.79    6.25
 -11 -14   2  100.17    6.04
  11 -14  -2  105.41    6.85
  11 -14  -2   96.81    6.80
 -11 -14   2   93.54    6.34
  10 -14  -2  261.92   13.27
 -10 -14   2  265.02   13.11
 -10 -14   2  270.33   12.78
  10 -14  -2  270.82   13.58
  10 -14  -2  286.03   13.04
  -9 -14   2  299.64   13.91
   9 -14  -2  302.40   13.64
   9 -14  -2  289.60   13.83
  -9 -14   2  276.04   13.32
   9 -14  -2  287.34   14.37
  -9  14   2  274.09   12.83
  -8 -14   2  146.80    8.41
  -8 -14   2  138.66    7.78
   8 -14  -2  142.68    8.25
   8 -14  -2  126.57    7.89
   8 -14  -2  155.28    9.08
  -8  14   2  146.72    7.26
   7 -14  -2  130.20    8.44
  -7 -14   2  123.50    7.26
  -7 -14   2  127.91    7.95
   7 -14  -2  135.02    7.72
   7 -14  -2  134.58    7.50
   6 -14  -2   10.64    3.14
  -6 -14   2    9.66    3.54
   6 -14  -2    7.10    3.25
   6 -14  -2    7.79    2.97
  -6 -14   2    8.56    2.65
   5 -14  -2   92.54    6.05
  -5 -14   2   85.68    6.38
  -5 -14   2   77.78    5.63
   5 -14  -2   88.64    5.78
  -4 -14   2  211.51   10.76
   4 -14  -2  205.63   10.54
   4 -14  -2  208.54   10.53
   4 -14  -2  209.28   11.39
  -4 -14   2  227.68   11.36
   4 -14  -2  206.43   10.97
   3 -14  -2  339.53   14.68
   3 -14  -2  318.02   15.56
  -3 -14   2  347.21   14.82
   3 -14  -2  333.21   14.68
  -3 -14   2  292.51   14.86
   3 -14  -2  281.37   14.87
  -3 -14   2  307.63   15.36
  -2 -14   2  142.83    8.94
   2 -14  -2  156.44    8.48
   2 -14  -2  137.89    7.92
  -2 -14   2  137.90    8.06
  -2 -14   2  148.70    8.51
   2 -14  -2  159.49    8.96
   2 -14  -2  153.33    8.08
   1 -14  -2   76.86    5.31
   1 -14  -2   77.51    5.47
  -1 -14   2   82.76    5.61
  -1 -14   2   91.10    6.62
  -1 -14   2   82.62    5.96
   1 -14  -2   70.04    5.19
   1 -14  -2   79.88    6.12
   1 -14  -2   86.03    5.31
   0 -14  -2    3.55    3.36
   0 -14   2    3.38    2.91
   0 -14  -2    0.19    2.64
   0 -14  -2    3.34    2.66
   0 -14  -2    4.29    2.52
   1 -14   2   91.89    6.47
  -1 -14  -2   98.02    6.00
   1 -14   2  105.48    6.36
  -1 -14  -2   95.79    5.95
   1 -14   2  102.24    6.57
  -1 -14  -2  103.56    6.86
  -1 -14  -2   95.53    6.27
   2 -14   2   21.63    3.57
  -2 -14  -2   23.88    4.00
   2 -14   2   17.69    3.85
  -2 -14  -2   24.88    3.31
   2 -14   2   21.85    3.64
   2 -14   2   23.30    4.46
  -2 -14  -2   28.74    3.63
  -3 -14  -2  240.04   12.13
  -3 -14  -2  252.64   12.07
   3 -14   2  225.63   12.58
   3 -14   2  260.15   13.38
   3 -14   2  277.57   12.69
   3 -14   2  274.88   12.43
  -3 -14  -2  253.41   12.56
   4 -14   2  128.88    8.43
  -4 -14  -2  133.39    7.72
   4 -14   2  130.65    7.61
   4 -14   2  117.42    7.62
  -4 -14  -2  127.96    7.21
   4 -14   2  125.57    7.77
  -4 -14  -2  140.48    7.50
  -5 -14  -2   14.39    3.31
   5 -14   2   17.13    3.62
   5 -14   2   15.42    4.18
  -5 -14  -2   13.92    3.12
   5 -14   2   13.99    3.35
   6 -14   2    9.83    3.76
  -6 -14  -2    6.61    2.99
   6 -14   2    8.95    3.61
  -6 -14  -2    9.48    3.01
   6 -14   2    6.34    2.93
  -7 -14  -2   12.85    3.01
   7 -14   2   10.13    3.34
   7 -14   2    5.61    3.40
   7 -14   2    4.67    3.55
  -7 -14  -2    6.66    3.09
  -8 -14  -2   75.36    5.55
   8 -14   2   65.77    5.43
  -8 -14  -2   71.54    5.19
   8 -14   2   82.56    6.25
   8 -14   2   72.46    5.84
   9 -14   2    6.09    3.74
  -9 -14  -2    9.60    3.13
   9 -14   2   10.47    3.14
  -9 -14  -2    6.06    2.53
   9 -14   2    6.73    3.34
  10 -14   2   37.88    4.00
  10 -14   2   40.61    4.27
  10 -14   2   37.52    4.70
 -10 -14  -2   40.66    4.30
  11 -14   2   17.06    3.08
  11 -14   2   17.16    4.17
 -11 -14  -2   18.24    3.52
  11 -14   2   24.88    3.82
  12 -14   2   18.99    4.06
  12 -14   2   12.50    2.72
 -12 -14  -2   16.60    3.30
  12 -14   2   17.05    3.64
 -13 -14  -2   57.41    4.64
  13 -14   2   58.43    4.94
  14 -14   2    0.66    2.88
 -14 -14  -2    1.76    2.60
 -15 -14  -2   10.02    2.83
  15 -14   2    6.86    2.96
  16 -14   2    4.47    2.87
 -16 -14  -2    7.33    2.49
  16 -14   2    4.28    2.60
  17 -14   2   23.92    3.09
  17 -14   2   17.21    2.88
 -17 -14  -2   18.47    2.72
  18 -14   2   13.94    2.55
  18 -14   2   16.02    2.54
  19 -14   2   26.12    2.61
  19 -14   2   27.39    2.61
  20 -14   2   48.64    3.06
  20 -14   2   49.23    3.10
  21 -14   2   16.93    1.60
  21 -14   2   11.52    1.47
  21 -15  -2  208.06    8.74
  21 -15  -2  203.32    8.87
  20 -15  -2   35.81    2.60
  20 -15  -2   38.85    2.81
  19 -15  -2  179.52    7.09
  19 -15  -2  170.21    7.16
  18 -15  -2   18.22    2.58
  18 -15  -2   16.53    2.71
 -18  15   2   15.00    1.62
 -17  15   2   22.21    2.08
  17 -15  -2   18.04    2.83
  17 -15  -2   21.13    3.17
  16 -15  -2    1.02    1.64
  16 -15  -2   -0.53    2.48
 -16  15   2    4.30    1.65
  16 -15  -2    0.15    2.82
 -15  15   2  305.51   12.85
  15 -15  -2  293.54   13.01
  15 -15  -2  283.65   13.42
  15 -15  -2  286.62   13.65
 -14 -15   2   23.81    2.76
 -14  15   2   27.20    2.67
  14 -15  -2   16.28    3.59
  14 -15  -2   27.27    3.53
  14 -15  -2   26.08    3.17
 -14 -15   2   26.71    2.82
 -13  15   2   96.59    5.27
  13 -15  -2   88.87    6.40
  13 -15  -2   95.20    5.89
 -13 -15   2   90.97    5.54
 -13 -15   2   92.96    5.36
  13 -15  -2   94.47    5.96
  12 -15  -2  125.13    7.75
 -12  15   2  124.87    6.60
  12 -15  -2  145.08    7.75
  12 -15  -2  130.90    7.36
 -12 -15   2  128.46    6.77
 -12 -15   2  123.65    7.07
 -11 -15   2  186.31    9.36
  11 -15  -2  198.97    9.89
  11 -15  -2  168.64    9.27
  11 -15  -2  165.71    9.61
 -11 -15   2  185.22    8.90
 -10 -15   2   64.50    5.14
  10 -15  -2   58.30    4.81
 -10 -15   2   61.98    4.50
  10 -15  -2   66.60    5.61
  10 -15  -2   65.83    5.32
  -9 -15   2   86.35    6.09
   9 -15  -2   74.73    5.56
   9 -15  -2   92.29    6.53
  -9 -15   2   76.17    5.15
   9 -15  -2   84.41    6.05
   8 -15  -2   37.21    4.32
   8 -15  -2   36.09    4.96
   8 -15  -2   43.39    4.20
  -8 -15   2   34.87    4.45
   7 -15  -2   72.40    5.61
   7 -15  -2   83.14    5.58
   7 -15  -2   83.07    6.62
  -7 -15   2   87.52    6.27
   6 -15  -2  315.79   15.10
   6 -15  -2  329.35   15.05
  -6 -15   2  342.91   15.74
   5 -15  -2   16.33    3.27
  -5 -15   2   12.72    3.72
   5 -15  -2   11.68    3.37
   5 -15  -2   11.55    2.71
  -4 -15   2   93.62    6.90
   4 -15  -2   89.07    6.16
   4 -15  -2  102.91    5.80
   4 -15  -2  110.13    7.35
   4 -15  -2   94.27    6.26
   3 -15  -2  107.60    7.25
  -3 -15   2   93.54    7.14
   3 -15  -2  100.53    5.97
   3 -15  -2  100.50    6.27
   3 -15  -2  101.52    6.35
   2 -15  -2   72.16    4.97
   2 -15  -2   78.68    6.13
  -2 -15   2   80.28    5.61
   2 -15  -2   76.14    5.37
  -2 -15   2   70.10    6.15
   1 -15  -2   76.59    5.30
   1 -15  -2   81.83    5.69
  -1 -15   2   98.93    6.94
   1 -15  -2   83.43    6.44
  -1 -15   2   98.87    6.09
   0 -15  -2  244.41   11.80
   0 -15  -2  254.66   12.71
   0 -15   2  257.61   12.29
   1 -15   2  174.07    9.13
  -1 -15  -2  162.03    8.62
  -1 -15  -2  168.17    9.43
  -2 -15  -2  140.12    7.97
  -2 -15  -2  164.19    8.93
   2 -15   2  161.52    9.55
   2 -15   2  152.13    8.45
  -3 -15  -2  505.31   21.41
   3 -15   2  506.56   21.13
   3 -15   2  476.91   21.21
  -3 -15  -2  459.59   20.74
   3 -15   2  446.94   21.78
  -4 -15  -2   32.22    4.07
   4 -15   2   28.07    4.16
  -4 -15  -2   32.07    3.86
   4 -15   2   33.86    4.90
   4 -15   2   26.54    4.01
   5 -15   2    5.22    3.69
   5 -15   2    3.27    3.25
  -5 -15  -2    2.01    3.14
  -5 -15  -2    6.27    2.77
   5 -15   2    4.02    3.05
   6 -15   2  108.63    7.16
   6 -15   2  102.09    6.39
   6 -15   2   82.99    6.50
  -6 -15  -2   99.72    6.29
  -6 -15  -2   98.76    6.33
  -7 -15  -2  380.59   17.23
   7 -15   2  379.42   17.39
   7 -15   2  400.37   18.00
   7 -15   2  387.82   17.71
  -7 -15  -2  381.09   17.24
   8 -15   2  368.72   16.39
   8 -15   2  342.21   16.32
   8 -15   2  352.28   16.09
  -8 -15  -2  338.46   15.85
  -8 -15  -2  347.86   15.69
  -9 -15  -2  253.76   11.89
   9 -15   2  240.39   12.00
   9 -15   2  243.06   12.38
   9 -15   2  261.56   12.15
  -9 -15  -2  232.90   11.39
 -10 -15  -2  235.17   11.45
  10 -15   2  230.33   12.00
  10 -15   2  239.47   11.70
  10 -15   2  241.86   11.48
  11 -15   2    5.35    3.22
  11 -15   2    6.85    2.55
  11 -15   2   10.15    3.70
 -11 -15  -2    7.41    2.82
  12 -15   2    1.77    3.00
  12 -15   2    5.26    2.21
  12 -15   2    3.83    3.47
 -12 -15  -2    5.54    2.76
  13 -15   2  168.84    9.10
  13 -15   2  166.95    8.84
 -13 -15  -2  175.21    8.57
  14 -15   2  432.23   19.21
 -14 -15  -2  454.89   18.98
 -15 -15  -2   82.98    4.77
  15 -15   2   76.00    5.01
  16 -15   2  263.42   12.42
 -16 -15  -2  296.03   12.29
  17 -15   2    9.15    2.24
  17 -15   2    8.25    2.05
  18 -15   2   41.92    2.85
  18 -15   2   37.02    2.87
  19 -15   2   14.40    1.72
  19 -15   2   16.00    1.76
  20 -15   2  279.77   11.50
  19 -16  -2  168.41    7.43
  19 -16  -2  179.91    7.67
  18 -16  -2   32.10    2.71
  18 -16  -2   34.21    2.51
  17 -16  -2  123.97    6.37
  17 -16  -2  128.68    6.21
  16 -16  -2   21.65    2.93
  16 -16  -2   23.90    2.69
  15 -16  -2   23.88    3.16
  15 -16  -2   18.55    2.74
  15 -16  -2   21.26    2.25
  14 -16  -2   34.07    3.44
  14 -16  -2   35.09    2.97
  14 -16  -2   28.71    3.74
 -13 -16   2  238.45   11.54
  13 -16  -2  272.13   12.13
  13 -16  -2  279.91   12.02
  13 -16  -2  270.52   12.42
  12 -16  -2    2.40    2.67
  12 -16  -2    1.61    2.52
  12 -16  -2    5.11    3.11
 -12 -16   2    5.90    2.46
 -11 -16   2   80.79    5.29
  11 -16  -2   93.87    5.85
  11 -16  -2   77.52    5.72
  11 -16  -2   83.02    5.45
  10 -16  -2   64.16    4.77
 -10 -16   2   65.09    4.89
  10 -16  -2   57.43    5.00
  10 -16  -2   73.24    5.36
   9 -16  -2  241.47   12.28
   9 -16  -2  244.54   11.88
   9 -16  -2  242.91   11.65
  -9 -16   2  252.00   11.94
  -8 -16   2  246.64   11.85
   8 -16  -2  225.12   11.34
   8 -16  -2  257.38   12.42
   8 -16  -2  232.74   11.52
   7 -16  -2  106.10    7.11
  -7 -16   2   93.33    6.44
   7 -16  -2   95.80    5.97
   7 -16  -2   85.74    6.04
  -6 -16   2   24.40    3.96
   6 -16  -2   25.96    3.63
   6 -16  -2   25.62    3.52
  -5 -16   2  123.93    7.76
   5 -16  -2  122.12    7.02
   4 -16  -2  137.62    8.72
   4 -16  -2  157.93    7.94
  -4 -16   2  136.61    8.50
   3 -16  -2   84.30    6.48
   3 -16  -2   77.95    5.17
   3 -16  -2   88.57    5.52
  -3 -16   2   88.09    6.62
  -2 -16   2  393.76   18.23
   2 -16  -2  414.16   18.20
   2 -16  -2  370.92   16.88
  -1 -16   2   48.04    5.34
   1 -16  -2   41.56    3.76
   1 -16  -2   36.58    4.67
   0 -16  -2   61.53    4.54
   0 -16   2   68.05    5.15
   0 -16  -2   69.05    5.76
  -1 -16  -2  290.92   14.23
  -1 -16  -2  289.50   13.55
   1 -16   2  314.85   14.02
  -2 -16  -2   22.36    3.14
  -2 -16  -2   22.00    3.85
   2 -16   2   22.65    4.49
   2 -16   2   19.88    3.54
   3 -16   2    4.21    3.97
  -3 -16  -2    3.89    3.02
  -3 -16  -2    2.69    2.61
   3 -16   2    0.33    2.99
  -4 -16  -2  152.87    8.31
   4 -16   2  165.54    9.52
  -4 -16  -2  158.59    8.76
   4 -16   2  163.41    8.64
   5 -16   2  549.00   23.79
   5 -16   2  556.96   23.10
  -5 -16  -2  500.31   22.66
  -5 -16  -2  535.67   23.08
   6 -16   2  226.30   11.72
  -6 -16  -2  239.29   11.46
  -6 -16  -2  233.14   11.28
   6 -16   2  231.88   11.53
   6 -16   2  259.85   12.34
   7 -16   2  188.75    9.83
  -7 -16  -2  187.14    9.29
   7 -16   2  185.63    9.55
   7 -16   2  192.07    9.97
  -7 -16  -2  174.83    9.17
   8 -16   2   10.09    3.16
  -8 -16  -2    6.12    2.55
  -8 -16  -2    9.36    2.80
   8 -16   2    7.21    3.54
   8 -16   2    9.72    3.23
  -9 -16  -2   51.69    4.00
   9 -16   2   62.72    4.68
   9 -16   2   57.73    4.74
   9 -16   2   61.60    5.14
  -9 -16  -2   53.90    4.23
  10 -16   2  187.07   10.06
  10 -16   2  197.86    9.58
 -10 -16  -2  203.47    9.56
  10 -16   2  201.20    9.92
 -11 -16  -2  181.58    8.80
  11 -16   2  180.00    8.67
  11 -16   2  189.63    9.61
  11 -16   2  183.92    9.25
  12 -16   2  395.15   17.67
  12 -16   2  435.28   18.50
  12 -16   2  450.79   18.80
 -12 -16  -2  446.91   18.13
  13 -16   2   75.57    5.23
 -13 -16  -2   86.47    4.68
  13 -16   2   77.58    5.05
  14 -16   2   25.62    3.18
  14 -16   2   25.45    2.97
 -14 -16  -2   31.19    2.62
  15 -16   2    9.32    2.19
  16 -16   2  325.23   13.78
  17 -16   2   16.90    1.85
  18 -16   2  264.45   10.93
  16 -17  -2    3.96    1.37
  15 -17  -2   23.79    2.25
  14 -17  -2  268.05   11.81
  14 -17  -2  250.64   11.19
  14 -17  -2  286.79   11.66
  13 -17  -2   20.75    2.35
  13 -17  -2   19.53    2.92
  13 -17  -2   22.48    2.72
  12 -17  -2  193.94    9.12
  12 -17  -2  194.78    9.36
 -12 -17   2  187.73    8.79
  12 -17  -2  201.12    9.08
  11 -17  -2   10.25    2.54
 -11 -17   2    3.97    2.11
  11 -17  -2    5.39    2.40
  11 -17  -2    5.00    2.64
  10 -17  -2   11.19    2.94
  10 -17  -2   16.94    2.84
 -10 -17   2   13.14    2.62
  -9 -17   2   36.94    3.58
   9 -17  -2   29.85    3.36
   9 -17  -2   37.92    3.97
   8 -17  -2  142.83    7.80
   8 -17  -2  168.46    8.71
  -8 -17   2  161.73    8.25
  -7 -17   2   20.77    3.44
   7 -17  -2   19.39    3.88
   7 -17  -2   16.81    3.00
   6 -17  -2  343.51   15.52
  -6 -17   2  365.66   16.15
   5 -17  -2   13.97    2.80
  -5 -17   2   12.27    3.41
   4 -17  -2   91.03    6.61
  -4 -17   2   98.78    6.62
   3 -17  -2    6.36    3.62
  -3 -17   2    2.89    3.38
   2 -17  -2   37.74    4.59
  -2 -17   2   36.29    4.64
   1 -17  -2   20.80    3.79
  -1 -17   2   24.21    4.16
   0 -17  -2  515.31   22.56
  -1 -17  -2   10.49    2.62
  -1 -17  -2    7.80    3.28
   2 -17   2  350.09   15.79
  -2 -17  -2  313.24   14.35
  -2 -17  -2  327.77   15.05
  -3 -17  -2    2.85    2.36
   3 -17   2   10.10    3.05
   3 -17   2   11.05    3.91
  -3 -17  -2    3.12    2.86
  -4 -17  -2   -0.16    2.67
   4 -17   2    2.77    2.77
   4 -17   2    3.83    3.51
  -4 -17  -2    2.21    2.33
   5 -17   2    5.21    3.00
   5 -17   2    6.50    3.42
  -5 -17  -2    7.18    2.73
  -5 -17  -2    6.48    2.40
  -6 -17  -2  339.41   15.57
  -6 -17  -2  371.74   15.96
   6 -17   2  376.12   16.58
   6 -17   2  368.18   16.08
   7 -17   2    2.10    2.72
   7 -17   2    0.32    2.89
  -7 -17  -2    4.43    2.21
  -7 -17  -2    0.98    2.30
  -8 -17  -2  499.12   21.46
   8 -17   2  559.08   22.10
   8 -17   2  527.85   21.99
  -8 -17  -2  494.15   21.47
  -9 -17  -2    5.02    2.10
   9 -17   2    3.09    2.22
   9 -17   2    2.09    2.56
  10 -17   2   24.14    2.55
  10 -17   2   24.90    3.09
 -10 -17  -2   23.02    2.45
  11 -17   2   44.95    3.54
 -11 -17  -2   46.49    2.96
  12 -17   2  178.91    8.55
 -12 -17  -2  182.11    8.00
  13 -17   2    2.25    1.93
  14 -17   2  237.13   10.29
  15 -17   2   28.67    2.11
  12 -18  -2   33.49    2.33
 -11 -18   2   20.54    1.94
  11 -18  -2   21.11    2.22
 -10 -18   2  252.16   11.57
  10 -18  -2  293.22   11.99
   9 -18  -2  170.75    8.08
  -9 -18   2  155.22    7.67
  -8 -18   2  262.22   11.99
   8 -18  -2  276.83   12.39
  -7 -18   2    5.78    2.42
   7 -18  -2    7.59    3.05
  -6 -18   2    3.47    2.64
  -5 -18   2  206.55   10.12
  -4 -18   2  218.91   10.46
   4 -18  -2  204.52   10.57
   3 -18  -2  202.31   10.34
  -3 -18   2  207.53   10.27
   2 -18  -2  303.23   14.26
  -2 -18   2  313.46   14.38
  -1 -18   2   47.86    4.77
   1 -18  -2   57.37    4.63
   0 -18  -2   66.45    5.03
  -1 -18  -2  229.60   10.98
   2 -18   2  187.89    9.66
  -2 -18  -2  178.38    9.11
   3 -18   2    3.22    3.02
  -3 -18  -2    2.52    2.40
   4 -18   2  386.01   17.00
  -4 -18  -2  374.52   16.46
   5 -18   2  100.29    6.06
  -5 -18  -2   94.85    5.43
   6 -18   2   55.93    4.03
  -6 -18  -2   41.35    3.38
   7 -18   2   11.81    2.39
  -7 -18  -2    7.69    1.84
   8 -18   2  122.43    6.04
   8 -18   2  118.30    6.24
   9 -18   2  130.87    6.03
   9 -18   2  106.40    5.41
  10 -18   2  287.92   12.41
  11 -18   2   43.12    2.94
   9 -19  -2   15.97    1.79
  -8 -19   2   96.75    4.95
   8 -19  -2  115.97    5.36
  -7 -19   2  103.80    5.19
   7 -19  -2  104.51    5.51
  -6 -19   2  421.76   17.65
  -5 -19   2    5.89    2.11
   4 -19  -2  116.65    6.23
  -4 -19   2  108.65    5.97
  -3 -19   2   82.85    4.96
   3 -19  -2   78.66    5.03
   2 -19  -2   69.40    4.68
  -2 -19   2   65.90    4.55
  -1 -19   2  108.83    6.21
   1 -19  -2  107.54    6.03
   0 -19  -2  512.61   21.53
  -1 -19  -2    1.30    2.20
   2 -19   2  248.04   11.24
  -2 -19  -2  239.44   10.87
   3 -19   2   51.46    3.82
  -3 -19  -2   45.04    3.32
   4 -19   2   37.80    3.26
  -4 -19  -2   38.56    2.84
   5 -19   2    0.98    1.77
  -5 -19  -2    4.25    1.46
   6 -19   2  214.19    9.31
  33   0  -3    0.44    0.75
 -32   0   3    0.66    1.29
  32   0  -3    0.17    1.20
 -32   0   3    1.78    1.02
  31   0  -3    0.06    1.14
 -31   0   3    2.52    1.49
 -31   0   3    0.87    1.62
 -30   0   3   -1.16    1.96
  30   0  -3   -0.51    1.36
  29   0  -3    0.71    1.63
  29   0  -3   -0.20    1.99
  28   0  -3    1.91    2.21
  28   0  -3    0.93    1.94
  27   0  -3   -0.98    2.42
  27   0  -3    0.81    1.98
  26   0  -3    1.01    2.06
  26   0  -3    0.26    2.21
  25   0  -3    0.13    2.06
  25   0  -3    1.21    2.31
 -24   0   3    0.75    2.11
  24   0  -3   -0.14    2.57
  24   0  -3    0.14    2.23
  23   0  -3    0.27    2.45
 -23   0   3    0.15    2.08
  22   0  -3   -0.14    2.38
 -22   0   3    0.90    2.36
 -21   0   3   -1.04    2.51
  21   0  -3   -1.59    2.53
 -20   0   3    0.14    2.12
  20   0  -3    1.03    2.28
  19   0  -3    3.11    2.21
 -19   0   3    0.42    2.41
 -18   0   3    0.67    2.39
 -17   0   3    0.26    2.06
 -16   0   3   -0.24    2.21
 -15   0   3   -0.92    2.38
 -14   0   3    1.60    2.52
 -13   0   3   -0.49    2.29
  13   0  -3   -0.62    1.84
 -12   0   3    1.58    2.40
  12   0  -3    1.68    1.41
  11   0  -3    1.14    1.60
 -11   0   3    1.32    1.91
 -10   0   3    1.41    1.75
  10   0  -3    0.25    1.41
  -9   0   3    0.57    1.61
   9   0  -3    3.31    1.30
   8   0  -3    0.86    1.18
  -8   0   3    1.14    1.16
  -7   0   3   -0.35    1.22
  -6   0   3    0.26    1.13
  -5   0   3    0.44    0.96
  -4   0   3    0.72    0.80
  -3   0   3    0.58    0.73
  -2   0   3    1.53    0.55
  -1   0   3    0.15    0.49
   0   0   3    0.70    0.64
   1   0   3    0.39    0.60
   2   0   3    0.86    0.75
   3   0   3    0.17    0.92
   4   0   3    0.49    0.91
   5   0   3    0.81    1.15
   6   0   3    1.75    1.37
   7   0   3   -0.36    1.33
  -8   0  -3    0.07    1.47
   8   0   3    0.34    1.44
  -9   0  -3    1.47    1.93
  -9   0  -3   -0.81    1.44
 -10   0  -3   -0.49    2.15
 -11   0  -3   15.28    2.50
 -12   0  -3    1.74    2.04
 -13   0  -3    0.73    1.98
 -14   0  -3    2.25    2.13
 -15   0  -3    3.87    2.23
  16   0   3    0.97    2.13
 -16   0  -3    0.52    2.04
  16   0   3    2.03    1.96
 -17   0  -3    1.93    2.20
  17   0   3    3.62    2.16
  17   0   3    1.40    2.31
  18   0   3    0.65    2.10
 -18   0  -3   -2.04    2.47
  18   0   3    1.28    2.41
  18   0   3    1.74    2.38
  19   0   3    4.66    2.66
  19   0   3    2.67    2.33
 -19   0  -3    2.74    2.47
  19   0   3    1.67    2.33
  20   0   3    3.28    2.70
  20   0   3    0.27    2.30
 -20   0  -3    1.41    2.19
  20   0   3    3.40    2.74
  21   0   3    2.16    2.69
  21   0   3    2.06    2.61
  21   0   3    2.72    2.31
 -21   0  -3    4.59    2.39
  22   0   3    2.01    2.55
  22   0   3    2.57    2.74
  23   0   3    1.52    2.53
  23   0   3    2.57    2.47
  24   0   3    0.13    2.40
  24   0   3    1.35    2.24
  24   0   3    0.46    1.50
  25   0   3    1.44    2.41
  25   0   3    2.32    1.42
  26   0   3    2.58    2.22
  26   0   3    1.71    1.25
  27   0   3    0.83    2.00
  28   0   3    0.77    1.63
  28   0   3    2.30    1.40
  29   0   3    2.76    1.12
  29   0   3    2.78    1.40
  30   0   3    0.86    0.99
 -32   1   3    4.45    1.23
  32   1  -3    4.97    0.96
 -32   1   3    4.66    1.38
  32  -1  -3    2.33    1.25
 -31   1   3   34.04    2.67
 -31   1   3   33.89    2.56
  31   1  -3   39.76    2.34
  31  -1  -3   34.43    2.20
 -31  -1   3   31.70    2.31
  30  -1  -3   34.17    2.43
 -30   1   3   35.03    2.95
  30   1  -3   34.41    2.50
  29   1  -3   40.53    3.25
  29   1  -3   41.77    2.98
  29  -1  -3   39.97    2.94
  28   1  -3    0.93    1.85
  28   1  -3   -2.66    2.37
  28  -1  -3   -1.32    1.82
  27   1  -3   32.02    3.00
  27  -1  -3   29.86    2.91
  27   1  -3   29.50    3.08
  26  -1  -3   35.91    3.26
  26   1  -3   35.62    3.52
  26   1  -3   39.63    3.37
  25  -1  -3   12.66    2.53
  25   1  -3    9.10    2.60
  24  -1  -3    3.82    2.22
  24   1  -3    3.14    2.43
 -24   1   3    1.51    2.33
 -23   1   3   33.42    3.64
  23  -1  -3   45.96    3.63
  23   1  -3   41.88    3.67
  22  -1  -3  237.57   10.80
 -22   1   3  235.59   10.97
  22   1  -3  211.19   10.69
 -21   1   3   12.64    2.45
  21   1  -3    8.96    2.70
  20   1  -3  147.18    7.79
 -20   1   3  163.53    8.13
 -19   1   3    7.30    2.33
  19   1  -3    8.64    2.47
 -18   1   3  548.33   23.18
 -17   1   3   17.75    2.92
 -16   1   3 1280.77   51.60
 -15   1   3   22.18    2.99
 -14   1   3  160.37    7.90
 -13   1   3  192.00    8.92
  13   1  -3  183.75    8.57
  12   1  -3 1222.07   46.77
 -12   1   3 1116.90   46.81
 -11   1   3   17.25    2.43
  11   1  -3   15.40    1.92
 -10   1   3  425.13   17.51
  10   1  -3  423.95   17.40
  -9   1   3  491.85   20.56
   9   1  -3  523.01   20.56
  -8   1   3  783.98   30.93
   8   1  -3  769.63   30.90
  -7   1   3  129.37    5.66
  -6   1   3 2389.91   93.61
  -5   1   3 1224.03   48.08
  -4   1   3  564.87   22.31
  -3   1   3  469.53   18.56
  -2   1   3  805.84   31.65
  -1   1   3  260.17   10.37
   0   1   3  195.19    7.87
   1   1   3  585.47   23.11
   2  -1   3   34.04    1.78
   2   1   3   41.39    1.95
   3   1   3    7.42    1.11
   3  -1   3    8.47    0.76
  -3  -1  -3    8.11    0.51
   4   1   3  131.51    5.49
   4  -1   3  124.89    5.08
   5   1   3  283.30   11.66
   6   1   3   22.69    1.84
   7   1   3   20.03    2.07
   8   1   3    2.82    1.76
  -8   1  -3    2.33    1.28
  -9   1  -3 1033.65   41.81
  -9   1  -3 1061.91   41.87
 -10   1  -3    4.88    2.02
 -11   1  -3   41.60    3.30
 -12   1  -3   85.71    4.91
 -13   1  -3  426.15   18.08
 -14   1  -3    7.28    2.16
 -15   1  -3  677.42   28.03
  16   1   3   48.02    3.78
  16   1   3   53.82    3.85
 -16   1  -3   63.72    4.31
  16  -1   3   60.55    3.92
  17   1   3   43.29    3.80
  17   1   3   45.37    3.72
  17   1   3   45.03    3.57
 -17   1  -3   49.95    3.86
  17  -1   3   40.40    3.51
  18   1   3   97.19    5.91
  18  -1   3   95.62    5.56
 -18   1  -3   95.97    5.74
  18   1   3   92.13    5.66
  18   1   3   89.91    5.46
  18  -1   3   98.76    5.68
  19   1   3  811.68   32.70
  19  -1   3  765.40   32.39
  19   1   3  785.51   32.40
 -19   1  -3  788.98   32.62
  19  -1   3  790.98   32.41
  19   1   3  771.21   32.43
  20   1   3    8.90    2.61
 -20   1  -3   11.48    2.91
  20  -1   3    9.11    2.71
  20   1   3   11.41    3.05
  20  -1   3   10.03    2.61
  20   1   3   10.24    2.57
  21  -1   3    6.25    2.66
  21   1   3    2.56    2.32
  21   1   3    2.14    2.68
 -21   1  -3    6.36    2.29
  21   1   3    5.39    2.99
  22  -1   3  128.70    6.88
  22  -1   3  125.58    6.33
  22   1   3  121.71    7.05
  22   1   3  134.62    7.12
  22   1   3  124.66    6.80
  23   1   3  317.91   13.29
  23  -1   3  277.07   12.86
  23   1   3  280.91   13.15
  23  -1   3  283.27   12.46
  24  -1   3    3.33    1.54
  24   1   3   -0.26    2.60
  24   1   3    2.49    2.46
  24  -1   3    4.91    2.12
  25   1   3  116.20    5.78
  25   1   3  125.20    6.48
  25  -1   3  116.15    5.59
  26   1   3  116.14    5.74
  26   1   3   94.58    4.93
  27   1   3   23.98    2.58
  27  -1   3   22.24    2.28
  27   1   3   18.66    1.68
  28   1   3   30.06    2.52
  28  -1   3   25.84    2.21
  29  -1   3   96.87    4.81
  29   1   3   97.26    4.75
  30   1   3   35.49    2.07
 -32  -2   3   17.46    1.61
  32  -2  -3   16.29    1.61
 -32   2   3   15.54    1.59
 -32   2   3   13.68    1.58
  32   2  -3   14.01    1.30
 -31   2   3   45.06    2.85
  31   2  -3   43.36    2.51
 -31   2   3   42.80    2.80
  31  -2  -3   44.02    2.82
 -31  -2   3   39.84    2.74
 -30   2   3   44.29    3.17
  30   2  -3   42.98    2.78
 -30  -2   3   35.03    3.00
  30  -2  -3   44.52    2.71
  29   2  -3   42.88    3.11
  29  -2  -3   44.60    3.34
  29  -2  -3   40.64    2.91
  29   2  -3   44.38    3.28
  28  -2  -3   17.12    2.27
  28   2  -3   18.45    2.61
  28  -2  -3   19.11    2.67
  28   2  -3   19.78    2.46
  27  -2  -3    3.00    2.37
  27   2  -3   -0.59    2.35
  27   2  -3    4.09    2.07
  27  -2  -3    0.78    1.93
  26  -2  -3   16.89    2.91
  26  -2  -3   22.63    2.69
  26   2  -3   15.24    2.81
  25  -2  -3   11.59    2.66
  25  -2  -3   17.23    2.63
  25   2  -3   15.56    2.78
  24  -2  -3    5.18    2.51
  24  -2  -3    8.61    2.35
  24   2  -3    5.06    2.51
  23  -2  -3    1.10    2.37
  23  -2  -3    3.15    2.25
  23   2  -3   -1.52    2.49
 -23   2   3   -0.15    2.41
 -23  -2   3   -0.31    2.35
 -22  -2   3  124.12    6.99
  22  -2  -3  115.11    6.77
  22  -2  -3  137.75    6.92
  22   2  -3  123.17    6.84
 -22   2   3  130.91    7.09
  21  -2  -3    2.42    2.52
  21   2  -3    4.20    2.70
 -21  -2   3    1.80    2.35
 -21   2   3   -1.50    2.33
  21  -2  -3    4.20    2.15
 -20  -2   3  486.40   19.97
  20  -2  -3  446.76   19.64
  20   2  -3  435.22   19.60
  20  -2  -3  478.07   19.75
 -20   2   3  456.66   19.85
  19   2  -3   35.35    3.46
 -19  -2   3   36.67    3.45
  19  -2  -3   37.03    3.38
  19   2  -3   30.32    3.32
 -19   2   3   37.60    3.53
 -18   2   3  283.83   12.80
 -18  -2   3  275.25   12.73
 -17   2   3   41.04    3.65
 -17  -2   3   36.58    3.63
 -16  -2   3  969.92   38.60
 -16   2   3  923.19   38.50
 -15   2   3   51.07    3.97
 -15  -2   3   49.21    3.97
 -14   2   3 1443.64   59.25
 -14  -2   3 1523.80   59.31
 -13  -2   3   14.87    2.75
 -13   2   3   14.21    2.65
  13   2  -3   11.08    2.03
  13  -2  -3   12.70    1.82
  12   2  -3   45.93    3.08
  12  -2  -3   40.51    2.94
 -12   2   3   38.22    3.39
 -12  -2   3   44.11    3.49
 -11  -2   3  179.35    8.07
  11  -2  -3  178.62    7.91
 -11   2   3  175.31    8.08
  11   2  -3  170.71    7.86
 -10  -2   3  558.75   23.21
  10  -2  -3  568.58   23.14
 -10   2   3  561.13   23.21
  10   2  -3  597.95   23.20
   9  -2  -3  137.91    6.30
  -9  -2   3  138.75    6.38
  -9   2   3  140.19    6.41
   9   2  -3  148.13    6.34
   8  -2  -3 1034.42   42.34
   8   2  -3 1094.43   42.39
  -8  -2   3 1075.69   42.38
  -8   2   3 1080.28   42.37
  -7   2   3  755.02   29.46
  -7  -2   3  729.14   29.45
  -6   2   3  759.16   29.87
  -6  -2   3  750.96   29.87
  -5   2   3   71.65    3.25
  -5  -2   3   73.08    3.25
  -4   2   3 1226.64   48.07
  -4  -2   3 1224.73   48.08
  -3  -2   3  582.74   22.63
  -3   2   3  582.76   22.63
  -3  -2   3  539.85   22.87
  -2   2   3   22.63    1.29
  -2  -2   3   26.55    1.30
  -1  -2   3  100.66    4.20
  -1   2   3  101.89    4.20
   0  -2   3    5.64    0.75
   0   2   3    6.41    0.73
   0  -2   3    7.78    1.20
   1  -2   3   18.02    1.41
   1  -2   3   18.00    1.19
   1   2   3   18.88    1.19
   2  -2   3  118.13    4.95
   2  -2   3  116.32    5.01
   2   2   3  116.74    4.93
   3   2   3   44.86    2.24
   3  -2   3   45.17    2.22
   3  -2   3   44.87    2.25
  -3  -2  -3   41.77    1.95
   4  -2   3  119.19    5.38
  -4  -2  -3  124.79    5.03
   4  -2   3  122.76    5.23
   4   2   3  125.88    5.38
   5  -2   3    2.46    1.22
  -5  -2  -3    1.60    0.50
   5   2   3    1.12    1.20
   5  -2   3    2.56    0.81
   6  -2   3    3.32    1.32
   6  -2   3    4.08    0.80
   6   2   3    6.01    1.49
   7   2   3   44.75    2.67
  -7  -2  -3   43.21    2.63
  -7   2  -3   39.56    2.61
   7  -2   3   35.96    1.90
   7  -2   3   44.37    2.72
  -8   2  -3   61.50    3.52
  -8   2  -3   65.92    3.70
  -8  -2  -3   63.86    3.54
  -8  -2  -3   57.23    3.63
   8  -2   3   62.16    2.70
   8   2   3   62.67    3.64
  -9   2  -3  371.54   13.67
  -9   2  -3  358.91   13.69
  -9  -2  -3  357.42   13.59
  -9  -2  -3  359.04   13.68
 -10   2  -3  140.06    6.86
 -10  -2  -3  144.04    6.88
 -11  -2  -3  323.55   14.15
 -11   2  -3  337.58   14.22
 -12   2  -3    2.09    2.14
 -12  -2  -3    2.05    2.12
 -13  -2  -3   15.70    2.36
 -13   2  -3   16.31    2.40
 -14  -2  -3  101.33    5.50
 -14   2  -3   95.78    5.47
 -15  -2  -3  425.28   18.35
 -15   2  -3  432.62   18.41
  16  -2   3   75.86    4.88
  16   2   3   85.61    4.99
 -16   2  -3   84.32    5.20
  16   2   3   91.54    5.06
 -16  -2  -3   86.83    5.20
 -17  -2  -3  678.85   27.73
  17   2   3  640.42   27.52
  17  -2   3  661.34   27.60
 -17   2  -3  683.54   27.78
  17  -2   3  671.51   27.61
  17   2   3  660.59   27.88
  17   2   3  654.02   27.52
  18  -2   3    2.39    2.23
  18  -2   3    1.93    2.34
  18   2   3    1.72    2.38
 -18   2  -3    4.58    2.47
  18  -2   3    1.08    2.53
  18   2   3    2.87    2.14
  18   2   3    3.24    2.58
 -18  -2  -3    0.14    2.18
  19  -2   3   88.68    5.41
  19   2   3   83.08    5.71
  19   2   3   84.84    5.43
 -19  -2  -3   91.85    5.62
  19   2   3   90.70    5.33
  19  -2   3   87.03    5.43
 -19   2  -3   94.91    5.68
  19  -2   3   89.81    5.38
 -20   2  -3   95.24    5.68
  20   2   3   93.12    5.62
  20  -2   3   85.46    5.35
  20   2   3   91.61    5.40
 -20  -2  -3   88.47    5.48
  20  -2   3   85.90    4.85
  20   2   3   92.92    5.99
  20  -2   3   90.62    5.62
  21  -2   3  891.93   34.86
 -21   2  -3  840.40   34.89
  21   2   3  855.15   34.76
  21   2   3  870.09   35.03
  21  -2   3  816.75   34.08
  21   2   3  835.69   34.60
  21  -2   3  814.09   34.47
 -21  -2  -3  844.44   34.86
  22  -2   3    2.91    2.21
  22  -2   3    4.93    1.62
  22  -2   3    4.37    2.67
  22   2   3    4.27    2.65
  22   2   3    1.55    2.24
  22   2   3    6.36    3.07
  23  -2   3   98.35    5.87
  23  -2   3   91.36    5.31
  23  -2   3   94.43    4.93
  23   2   3   98.85    5.79
  23   2   3   94.44    5.54
  23   2   3  110.88    6.14
  24   2   3   38.56    3.63
  24   2   3   38.51    3.75
  24  -2   3   41.92    3.69
  25   2   3   59.61    4.14
  25  -2   3   61.21    4.17
  26   2   3    3.77    1.51
  26  -2   3    5.45    2.17
  26  -2   3    4.42    1.99
  26   2   3    2.43    2.09
  27   2   3  322.53   13.06
  27  -2   3  346.89   13.15
  27   2   3  283.14   12.53
  27  -2   3  280.16   12.89
  28  -2   3   37.65    2.59
  28   2   3   45.53    2.75
  28  -2   3   44.14    2.80
  29   2   3   22.98    1.83
  29   2   3   15.28    1.41
  29  -2   3   17.31    1.57
  29  -2   3   20.73    1.82
  30  -2   3   22.93    1.53
 -32  -3   3  117.17    5.56
  32  -3  -3  140.94    5.74
 -32   3   3  105.39    5.50
 -32   3   3  146.46    5.78
  32   3  -3  139.08    5.56
 -31  -3   3    6.99    1.57
  31  -3  -3    6.23    1.64
 -31   3   3    6.58    1.78
  31   3  -3    7.41    1.39
 -31   3   3    6.84    1.54
 -30  -3   3  127.65    5.80
  30   3  -3  133.67    5.62
  30  -3  -3  119.37    5.80
 -30   3   3  120.83    5.77
 -29   3   3   66.68    4.13
  29  -3  -3   66.12    3.75
  29   3  -3   62.88    3.81
  28  -3  -3    4.02    1.85
  28   3  -3    4.52    2.13
  28  -3  -3    1.48    2.15
  27  -3  -3   11.11    2.28
  27  -3  -3   12.22    2.53
  27   3  -3   12.58    2.49
  26   3  -3  429.82   18.35
  26  -3  -3  425.05   18.22
  26  -3  -3  426.44   18.36
  25   3  -3   69.36    4.77
  25  -3  -3   72.25    4.80
  25  -3  -3   74.01    4.67
  24   3  -3  361.36   15.64
  24  -3  -3  357.00   15.54
  24  -3  -3  339.34   15.54
 -23  -3   3   21.47    2.99
 -23   3   3   14.34    2.78
  23  -3  -3   16.54    2.83
  23   3  -3   20.65    3.09
  23  -3  -3   21.84    3.07
 -22  -3   3   93.32    5.82
  22  -3  -3  106.64    5.77
 -22   3   3   91.13    5.74
  22   3  -3   89.74    5.78
  22  -3  -3   98.48    5.91
  21  -3  -3    1.90    2.13
  21   3  -3    1.24    2.34
 -21  -3   3    0.91    2.42
 -21   3   3    1.36    2.43
  21  -3  -3    4.49    2.50
  20   3  -3  561.78   24.50
  20  -3  -3  605.09   24.56
 -20   3   3  598.57   24.75
 -20  -3   3  638.79   24.89
  20  -3  -3  529.21   24.40
  19  -3  -3   76.18    4.86
  19  -3  -3   84.36    5.01
  19   3  -3   70.76    4.78
 -19   3   3   77.81    5.13
 -19  -3   3   85.79    5.23
 -18   3   3  359.28   16.41
 -18  -3   3  391.62   16.54
 -17  -3   3    1.85    2.13
 -17   3   3    2.79    2.19
 -16   3   3  148.27    7.71
 -16  -3   3  159.13    7.76
 -15   3   3  114.12    6.23
 -15  -3   3  113.58    6.20
 -14  -3   3 1175.95   45.93
 -14   3   3 1105.13   45.86
 -13  -3   3   15.05    2.60
 -13   3   3    8.56    2.46
  12   3  -3   55.64    3.38
 -12   3   3   51.54    3.66
 -12  -3   3   53.00    3.70
  12  -3  -3   49.48    3.18
  11  -3  -3    7.06    1.70
 -11   3   3    9.03    2.06
  11   3  -3    8.48    1.81
 -11  -3   3   10.57    2.04
 -10   3   3    9.52    1.89
  10  -3  -3   11.88    1.60
 -10  -3   3   10.46    1.74
  10   3  -3   12.58    1.57
   9   3  -3   75.23    3.82
  -9  -3   3   74.94    3.86
   9  -3  -3   78.35    3.85
  -9   3   3   77.66    3.90
  -8   3   3   26.79    1.92
   8  -3  -3   25.67    1.85
   8   3  -3   29.18    1.89
  -8  -3   3   27.81    1.94
   7   3  -3   52.56    2.69
   7  -3  -3   50.11    2.65
  -7   3   3   52.95    2.66
  -7  -3   3   54.73    2.70
  -6  -3   3   62.63    2.91
  -6   3   3   60.00    2.88
  -5  -3   3   73.71    3.19
  -5  -3   3   71.52    3.61
  -5   3   3   68.50    3.16
  -4  -3   3   76.73    3.22
  -4   3   3   73.95    3.20
  -4  -3   3   67.69    3.59
  -3  -3   3   13.26    0.87
  -3  -3   3   12.48    0.94
  -3  -3   3   12.11    1.53
  -3   3   3   11.82    0.89
  -2  -3   3   61.37    2.68
  -2   3   3   63.53    2.70
  -1   3   3  593.68   23.31
  -1  -3   3  590.52   23.31
   0   3   3  576.19   22.34
   0  -3   3  567.35   22.34
   0  -3   3  544.75   22.60
   1   3   3  434.60   17.32
   1  -3   3  444.64   17.59
   1  -3   3  434.98   17.33
   2   3   3  566.81   21.90
  -2  -3  -3  550.44   21.88
   2  -3   3  550.39   21.90
   2  -3   3  538.28   22.07
   3  -3   3   87.73    3.94
  -3  -3  -3   88.73    3.80
   3   3   3   91.20    3.93
   3  -3   3   83.79    4.05
  -4  -3  -3   16.80    1.11
   4  -3   3   15.28    1.42
   4  -3   3   14.42    1.44
   4   3   3   14.93    1.41
  -5  -3  -3 1740.75   66.88
   5   3   3 1699.27   67.20
   5  -3   3 1700.40   67.07
   5  -3   3 1654.65   67.20
   6  -3   3  577.90   22.70
   6   3   3  545.97   22.95
   6  -3   3  559.26   22.97
  -6  -3  -3  576.17   22.50
   7   3   3  227.05    9.99
   7  -3   3  227.41    9.99
  -7  -3  -3  225.92    9.35
  -7  -3  -3  233.56    9.93
   7  -3   3  253.10    9.60
  -7   3  -3  222.91    9.88
  -8  -3  -3  381.30   15.68
   8  -3   3  390.86   15.19
  -8   3  -3  372.39   15.73
  -8   3  -3  348.05   15.61
  -8  -3  -3  380.71   15.74
  -9   3  -3  532.31   22.15
  -9  -3  -3  552.80   22.18
   9  -3   3  547.66   21.49
  -9   3  -3  522.15   22.09
  -9  -3  -3  534.78   22.11
 -10  -3  -3   12.64    2.46
  10  -3   3   17.47    1.21
 -10   3  -3   18.60    2.60
 -11   3  -3 1486.55   59.83
 -11  -3  -3 1519.15   59.85
 -12  -3  -3   78.64    4.59
 -12   3  -3   76.22    4.56
 -13  -3  -3    3.33    1.96
 -13   3  -3    3.38    1.98
 -14  -3  -3   47.11    3.62
 -14   3  -3   49.85    3.74
 -15  -3  -3  269.00   11.90
 -15   3  -3  253.27   11.82
 -16  -3  -3   14.90    2.51
 -16  -3  -3    9.16    2.37
  16   3   3   21.27    3.25
 -16   3  -3   13.33    2.39
  16   3   3   17.74    2.53
  16  -3   3   11.46    2.44
  16   3   3   15.77    2.66
  17   3   3  186.56    9.12
 -17  -3  -3  172.05    9.12
 -17   3  -3  208.93    9.44
  17   3   3  192.90    9.19
  17   3   3  193.91    9.60
  17  -3   3  185.56    9.19
 -17  -3  -3  193.09    9.31
  18   3   3    3.82    2.36
  18  -3   3    2.83    2.35
 -18   3  -3    3.53    2.33
 -18  -3  -3    4.90    2.29
  18   3   3    2.41    2.98
  18   3   3    4.33    2.25
  19  -3   3   85.90    5.44
  19   3   3   95.59    5.89
  19   3   3   87.95    5.34
  19   3   3   83.03    5.41
 -19   3  -3   88.08    5.37
 -19  -3  -3   80.00    5.23
  20   3   3   37.87    3.57
  20   3   3   41.24    3.43
 -20  -3  -3   34.85    3.63
  20  -3   3   41.07    3.75
 -20   3  -3   30.79    3.64
  21   3   3   63.62    5.07
 -21  -3  -3   68.08    4.73
  21   3   3   66.25    4.47
 -21   3  -3   64.42    4.71
  21   3   3   70.98    4.71
  21  -3   3   69.94    4.79
  22   3   3    4.66    2.41
  22  -3   3    5.08    2.53
  22   3   3    4.18    2.23
  22   3   3    9.17    3.03
  23   3   3  101.27    6.02
  23   3   3   98.45    6.26
  23   3   3  111.10    5.90
  23  -3   3  117.80    6.27
  24  -3   3   17.72    2.76
  24   3   3   21.34    2.77
  24   3   3   21.97    3.21
  25  -3   3  128.46    6.67
  25  -3   3  126.97    6.62
  25   3   3  131.04    6.63
  26  -3   3   46.17    3.44
  26  -3   3   49.38    3.49
  26   3   3   51.86    3.49
  27  -3   3   10.64    1.99
  27  -3   3   11.42    1.99
  27   3   3    8.14    1.45
  27   3   3   13.52    1.97
  28  -3   3    3.83    1.54
  28   3   3    2.22    1.44
  28   3   3    1.91    0.94
  28  -3   3   -0.67    1.42
  29  -3   3  100.67    4.34
  29   3   3  105.19    4.35
 -30   3  -3   38.93    2.15
  32  -4  -3   30.94    1.99
  32   4  -3   34.61    1.86
 -31  -4   3   84.97    4.14
 -31   4   3   78.54    4.08
  31  -4  -3   85.14    4.33
 -30  -4   3  137.33    6.51
 -30   4   3  135.23    6.52
 -30   4   3  148.38    6.83
  30  -4  -3  132.64    6.31
 -29  -4   3    8.27    1.98
  29  -4  -3    4.59    2.13
 -29   4   3    6.71    1.97
 -29   4   3    4.14    2.17
  28  -4  -3  929.71   39.27
  28   4  -3  988.31   39.05
  28  -4  -3  983.07   39.09
  27  -4  -3  133.95    7.02
  27   4  -3  143.90    7.02
  27  -4  -3  141.03    6.86
  26   4  -3  234.40   10.54
  26  -4  -3  224.99   10.51
  26  -4  -3  222.93   10.38
  25  -4  -3   69.52    4.75
  25   4  -3   76.97    4.91
  25  -4  -3   76.84    4.68
  24  -4  -3  931.50   36.75
  24  -4  -3  861.70   36.69
  24   4  -3  899.10   36.76
 -23  -4   3   26.38    3.26
  23  -4  -3   34.93    3.47
 -23   4   3   30.85    3.28
  23  -4  -3   36.41    3.32
  23   4  -3   40.05    3.59
  22  -4  -3 1732.74   70.93
  22   4  -3 1777.87   71.00
  22  -4  -3 1840.54   71.02
 -22  -4   3 1832.39   71.20
 -22   4   3 1691.09   71.06
  21  -4  -3  128.36    7.11
  21   4  -3  136.32    7.22
  21  -4  -3  135.75    7.17
 -21  -4   3  146.88    7.47
 -21   4   3  127.36    7.30
  20  -4  -3  115.93    6.49
  20   4  -3  115.84    6.49
 -20  -4   3  118.58    6.58
 -20   4   3  117.18    6.59
  20  -4  -3  115.23    6.39
  19  -4  -3    4.76    2.28
  19  -4  -3    7.15    2.27
 -19   4   3    3.48    2.48
  19   4  -3    6.13    2.32
 -19  -4   3    1.45    2.44
  18  -4  -3  655.36   28.41
 -18  -4   3  746.51   28.77
 -18   4   3  709.07   28.68
  18  -4  -3  709.83   28.53
  18   4  -3  634.35   28.30
 -17  -4   3  174.48    8.52
 -17   4   3  168.82    8.52
 -16  -4   3  824.77   33.34
 -16   4   3  799.24   33.31
 -15   4   3   16.06    2.54
 -15  -4   3   20.39    2.62
 -14  -4   3    5.90    2.09
 -14   4   3    6.78    2.33
 -13   4   3    6.34    2.11
 -13  -4   3    4.26    2.08
 -12  -4   3   53.50    3.46
 -12   4   3   46.60    3.36
 -11   4   3   12.97    2.02
  11  -4  -3   13.89    1.73
  11   4  -3   11.89    1.89
 -11  -4   3   10.92    1.95
  10   4  -3  104.75    5.13
 -10   4   3  111.26    5.15
 -10  -4   3  102.49    5.07
  10  -4  -3  106.20    5.10
   9  -4  -3   52.22    2.96
  -9  -4   3   51.29    2.94
  -9   4   3   47.77    2.89
  -8  -4   3  271.97   11.24
   8  -4  -3  276.94   11.32
   8   4  -3  274.64   11.31
  -8   4   3  266.24   11.20
  -7  -4   3   76.56    3.54
   7  -4  -3   78.19    3.63
  -7  -4   3   72.33    3.96
   7   4  -3   80.47    3.64
  -7   4   3   74.42    3.51
  -6   4   3  741.01   29.81
  -6  -4   3  756.13   29.83
   6  -4  -3  759.62   29.90
  -6  -4   3  746.87   30.21
   6   4  -3  770.70   29.92
  -5   4   3   19.27    1.23
  -5  -4   3   19.12    1.23
  -5  -4   3   19.70    1.88
  -4   4   3   11.84    0.87
  -4  -4   3   11.85    0.94
  -4  -4   3    9.57    1.58
  -3  -4   3 1995.85   77.87
  -3  -4   3 1995.16   78.31
  -3   4   3 1984.64   77.86
  -2   4   3 1633.18   64.15
  -2  -4   3 1646.19   64.15
  -1  -4   3    4.98    0.62
  -1   4   3    4.32    0.59
   0  -4   3 1047.63   42.44
   0   4   3 1072.85   42.05
   0  -4   3 1080.54   42.05
  -1  -4  -3 3188.95  122.78
   1  -4   3 3110.18  122.61
   1  -4   3 3131.30  122.96
   1   4   3 3134.24  122.60
   2  -4   3  120.69    5.61
  -2  -4  -3  125.15    5.34
   2  -4   3  122.94    5.27
   2   4   3  127.58    5.27
   3  -4   3 2448.58   97.94
   3  -4   3 2498.83   98.14
   3   4   3 2502.43   97.95
  -3  -4  -3 2545.18   97.91
   4  -4   3  761.39   30.99
   4  -4   3  750.05   30.90
  -4  -4  -3  797.24   30.76
   4   4   3  791.88   30.92
   5  -4   3   99.08    4.85
  -5  -4  -3  106.49    4.52
   5   4   3  106.11    4.86
   5  -4   3   98.40    4.81
   6  -4   3  314.12   12.71
  -6  -4  -3  314.07   12.46
   6   4   3  310.15   12.86
   6  -4   3  291.80   12.83
  -6   4  -3  290.57   12.75
  -6  -4  -3  317.77   12.82
  -7  -4  -3 4804.37  183.46
  -7   4  -3 4603.10  183.41
   7  -4   3 4783.44  183.23
  -7   4  -3 4506.74  183.38
  -7  -4  -3 4763.70  183.43
  -7  -4  -3 4649.09  182.98
  -8  -4  -3   49.91    3.16
  -8   4  -3   42.10    3.08
  -8  -4  -3   47.12    2.98
   8  -4   3   44.95    2.58
  -8  -4  -3   39.84    2.25
  -8   4  -3   42.58    2.88
   9  -4   3 2337.00   88.80
  -9  -4  -3 2275.01   89.26
  -9   4  -3 2124.67   89.17
 -10  -4  -3  294.72   12.72
  10  -4   3  300.73   12.06
 -10   4  -3  277.35   12.63
 -11   4  -3  406.57   17.63
 -11  -4  -3  432.55   17.69
 -12   4  -3   61.44    3.97
 -12  -4  -3   61.67    3.97
 -13  -4  -3 2208.22   85.70
 -13   4  -3 2113.73   85.64
 -14   4  -3   18.54    2.51
 -14  -4  -3   21.44    2.52
 -15  -4  -3  360.20   16.09
 -15   4  -3  361.68   16.09
  15   4   3  397.18   16.61
  16   4   3   49.64    4.10
 -16  -4  -3   44.99    3.57
  16   4   3   46.01    3.81
  16  -4   3   44.83    3.54
 -16  -4  -3   41.94    3.90
 -16   4  -3   45.74    3.57
  16   4   3   42.65    3.48
  16   4   3   42.77    3.54
  17   4   3  104.65    5.94
  17   4   3  100.19    5.86
  17  -4   3  105.97    6.03
 -17  -4  -3  115.28    6.12
 -17   4  -3  107.76    6.04
 -17  -4  -3   97.86    6.02
  18   4   3   75.69    4.82
  18  -4   3   71.20    4.76
 -18  -4  -3   68.44    4.78
 -18  -4  -3   75.68    5.03
 -18   4  -3   74.28    4.85
  18   4   3   71.10    4.70
 -19  -4  -3  398.07   17.32
  19  -4   3  405.10   17.29
 -19   4  -3  396.70   17.34
  19   4   3  380.54   17.15
  19   4   3  395.05   17.20
  20  -4   3   30.57    3.36
  20   4   3   33.97    3.30
 -20   4  -3   32.10    3.37
 -20  -4  -3   27.83    3.31
  20   4   3   26.37    3.13
  21   4   3  109.89    6.38
  21   4   3  119.66    6.54
  21  -4   3  116.46    6.59
  22  -4   3   62.98    4.57
  22   4   3   69.25    5.04
  22   4   3   64.38    4.51
  22   4   3   66.73    4.38
  23  -4   3   14.46    2.74
  23   4   3   13.17    2.51
  23   4   3   18.32    3.21
  23  -4   3   17.94    2.91
  23   4   3   13.00    2.33
  24  -4   3  132.55    6.66
  24  -4   3  128.71    6.78
  24   4   3  125.35    6.92
  24   4   3  118.92    6.45
  25  -4   3    3.87    2.04
  25   4   3    4.11    1.99
  25  -4   3    4.51    2.13
  26  -4   3   -0.18    1.77
  26   4   3    0.67    1.74
  26  -4   3    2.60    1.92
  27   4   3  122.92    5.66
  27  -4   3  125.36    5.89
  27   4   3  124.94    5.84
  27  -4   3  122.14    5.99
  28  -4   3   85.13    4.01
  28   4   3   80.61    3.94
  28  -4   3   82.43    4.10
  28   4   3   75.96    3.72
  29  -4   3  105.98    4.82
  29  -4   3  111.69    4.80
 -31   5   3    7.03    1.46
  31  -5  -3    5.78    1.40
 -30  -5   3  129.23    5.96
 -30   5   3  119.33    5.88
  30  -5  -3  146.47    6.35
 -30   5   3  148.58    6.42
  30  -5  -3  127.54    5.93
 -29   5   3   34.21    2.62
 -29   5   3   34.76    3.12
  29  -5  -3   34.30    2.97
  29  -5  -3   38.22    2.72
 -29  -5   3   40.18    2.78
 -28   5   3    2.17    1.83
 -28  -5   3    2.60    1.83
 -28   5   3   -2.44    2.38
  28  -5  -3    1.92    2.12
  27  -5  -3    5.63    2.39
  27   5  -3    2.92    1.93
  27  -5  -3    3.12    2.01
  26   5  -3  375.32   16.28
  26  -5  -3  390.09   16.37
  26  -5  -3  374.98   16.72
  25   5  -3    4.54    2.20
  25  -5  -3    5.23    2.07
  25  -5  -3    5.54    2.26
  24  -5  -3  471.50   20.29
  24   5  -3  479.54   20.33
  24  -5  -3  480.46   20.29
  23   5  -3   12.72    2.60
  23  -5  -3   12.51    2.69
  23  -5  -3   10.51    2.47
  22   5  -3    2.29    2.51
  22  -5  -3    2.82    2.45
 -22   5   3    1.30    2.14
  22  -5  -3    0.14    2.20
 -22  -5   3    0.73    2.15
  21  -5  -3    7.04    2.41
  21  -5  -3    6.08    2.65
 -21   5   3    6.26    2.30
  21   5  -3    3.79    2.47
 -21  -5   3    6.05    2.25
  20  -5  -3  538.96   21.54
 -20   5   3  490.51   21.45
  20  -5  -3  482.27   21.32
 -20  -5   3  518.94   21.58
  20   5  -3  486.81   21.32
  19  -5  -3   63.44    4.34
 -19  -5   3   60.88    4.37
  19   5  -3   56.41    4.15
  19  -5  -3   56.61    4.20
 -19   5   3   55.20    4.26
  18  -5  -3  647.43   28.15
  18   5  -3  639.41   28.07
  18  -5  -3  695.91   28.34
 -18  -5   3  742.44   28.48
 -18   5   3  694.81   28.38
 -17  -5   3   59.99    4.11
 -17  -5   3   59.22    4.48
 -17   5   3   51.18    4.03
 -16  -5   3   11.51    2.36
 -16   5   3   11.59    2.24
 -15  -5   3   24.65    2.67
 -15   5   3   20.87    2.66
 -14   5   3  485.38   20.48
 -14  -5   3  494.47   20.48
 -13   5   3   39.00    2.92
 -13  -5   3   40.96    3.00
 -12   5   3  657.98   26.90
 -12  -5   3  668.71   26.94
 -11  -5   3    5.55    1.62
 -11   5   3    8.60    1.64
  10   5  -3  263.89   10.45
 -10  -5   3  239.93   10.28
  10  -5  -3  243.28   10.39
 -10   5   3  226.62   10.21
   9  -5  -3  388.83   15.90
  -9   5   3  368.99   15.69
   9   5  -3  393.40   15.90
  -9  -5   3  396.21   15.76
  -8   5   3  176.41    7.46
   8  -5  -3  175.53    7.65
  -8  -5   3  178.95    7.50
  -8  -5   3  176.96    7.98
   8   5  -3  175.48    7.64
  -7  -5   3  112.44    4.85
  -7   5   3  105.17    4.78
   7   5  -3  112.65    5.00
   7  -5  -3  108.85    4.96
  -7  -5   3  119.40    5.44
  -6   5   3 1387.23   53.89
  -6  -5   3 1360.83   54.41
   6   5  -3 1332.59   54.02
  -6  -5   3 1378.14   53.91
   6  -5  -3 1395.02   54.06
   5  -5  -3  288.13   11.56
  -5  -5   3  293.40   11.46
  -5   5   3  289.64   11.44
   5   5  -3  271.89   11.53
  -5  -5   3  275.80   12.00
  -4  -5   3  721.18   29.46
  -4  -5   3  737.62   28.91
  -4   5   3  736.38   28.91
  -3  -5   3  938.65   38.89
  -3   5   3  965.77   38.34
  -3  -5   3 1000.61   38.34
  -2  -5   3   97.16    3.94
  -2  -5   3   84.17    4.54
  -2   5   3   95.56    3.94
  -1   5   3 2151.08   83.99
  -1  -5   3 2145.99   83.99
   0  -5   3  753.05   30.22
   0  -5  -3  797.42   30.62
   0   5   3  775.10   30.22
   0  -5   3  766.25   30.78
   1  -5   3   65.37    2.93
   1   5   3   63.51    2.92
  -1  -5  -3   67.45    3.29
   1  -5   3   74.48    3.65
   2   5   3 1308.68   49.79
  -2  -5  -3 1274.93   49.93
   2  -5   3 1222.18   49.76
   2  -5   3 1258.41   50.19
   3  -5   3  507.57   20.81
   3   5   3  531.30   20.84
  -3  -5  -3  518.49   20.85
   3  -5   3  524.48   21.15
  -4   5  -3   13.30    1.32
  -4  -5  -3   12.42    1.39
  -4  -5  -3   11.52    1.32
   4   5   3   12.09    1.56
   4  -5   3   13.38    1.95
   4  -5   3   11.97    1.46
  -5   5  -3 1393.92   56.21
  -5   5  -3 1327.10   56.16
  -5  -5  -3 1433.01   56.09
   5  -5   3 1425.15   56.39
  -5  -5  -3 1493.48   56.29
  -5  -5  -3 1483.24   56.25
  -6   5  -3  518.81   22.38
   6  -5   3  540.23   22.51
  -6  -5  -3  572.26   22.47
  -6  -5  -3  573.16   22.23
  -6  -5  -3  590.75   22.53
  -6   5  -3  529.19   22.42
  -7  -5  -3  346.71   14.48
  -7   5  -3  344.27   14.45
  -7  -5  -3  351.57   14.44
  -7   5  -3  321.53   14.35
   7  -5   3  358.95   14.44
  -7  -5  -3  350.08   14.08
  -8   5  -3  332.13   14.56
   8  -5   3  360.52   14.50
  -8  -5  -3  345.08   14.18
  -8  -5  -3  355.88   14.65
  -8   5  -3  323.88   14.56
  -8  -5  -3  375.92   14.73
  -9   5  -3  534.05   22.91
  -9  -5  -3  590.63   23.05
   9  -5   3  559.83   22.69
 -10   5  -3   80.63    4.59
  10  -5   3   85.98    4.13
 -10  -5  -3   80.30    4.61
 -11  -5  -3 1528.83   58.56
  11  -5   3 1471.85   57.96
 -11   5  -3 1404.91   58.44
 -12  -5  -3  123.23    6.16
 -12   5  -3  114.73    6.02
 -13  -5  -3   99.40    5.37
 -13   5  -3   94.87    5.33
 -14  -5  -3  174.77    8.09
 -14   5  -3  155.40    7.93
  15   5   3  175.40    8.91
 -15  -5  -3  197.97    8.85
  15   5   3  197.04    8.86
  15  -5   3  171.38    8.55
  15   5   3  182.51    9.20
  15   5   3  182.80    8.62
  15   5   3  158.67    8.44
 -15  -5  -3  174.99    9.03
 -15   5  -3  183.48    8.72
  16   5   3    4.82    2.27
  16  -5   3    6.34    2.22
  16   5   3    2.59    2.28
 -16   5  -3    6.39    2.20
 -16  -5  -3    4.61    2.49
  16   5   3    4.86    2.17
 -16  -5  -3    4.10    2.12
  16   5   3    5.45    2.75
  17   5   3  694.12   29.33
 -17   5  -3  698.66   29.34
  17   5   3  691.91   29.23
  17  -5   3  707.48   29.27
 -17  -5  -3  741.50   29.47
  17   5   3  724.83   29.91
 -17  -5  -3  702.19   29.66
 -18  -5  -3    1.55    2.03
  18   5   3    2.40    3.05
  18   5   3    7.85    2.44
  18   5   3    0.93    2.32
 -18  -5  -3    1.11    2.61
  18  -5   3    5.19    2.43
 -18   5  -3    3.07    2.14
  19   5   3  180.33    8.57
  19   5   3  184.60    9.26
 -19   5  -3  162.48    8.46
  19  -5   3  170.69    8.50
 -19  -5  -3  156.61    8.41
  19   5   3  164.36    8.39
 -19  -5  -3  181.81    8.94
  20  -5   3    9.34    2.52
 -20  -5  -3    7.14    2.30
  20   5   3    8.80    2.42
  20   5   3   11.53    2.60
 -20   5  -3    5.92    2.23
  21  -5   3  166.26    8.87
  21  -5   3  187.43    8.71
  21   5   3  181.02    8.59
  21   5   3  179.29    8.55
  21  -5   3  160.58    8.43
  22  -5   3    1.72    2.35
  22  -5   3    3.27    2.46
  22   5   3   -0.59    2.26
  22  -5   3    7.36    2.19
  22   5   3    5.16    2.25
  23  -5   3  467.25   20.48
  23   5   3  482.44   20.09
  23   5   3  480.12   20.11
  23  -5   3  480.35   20.19
  24  -5   3    8.99    2.44
  24   5   3   12.96    2.11
  24  -5   3   12.28    2.33
  24   5   3    9.27    2.16
  25  -5   3  178.93    8.21
  25   5   3  172.94    8.09
  25  -5   3  180.72    8.47
  26   5   3    3.03    1.57
  26  -5   3    3.28    1.64
  26  -5   3    5.43    1.93
  27  -5   3    1.27    1.37
  27   5   3    2.11    1.32
  27  -5   3    4.16    1.62
  27   5   3    3.03    1.21
  28  -5   3    1.65    1.27
  28  -5   3    3.16    1.08
  28   5   3    2.98    0.96
  28   5   3    1.84    0.94
 -29   5  -3  111.20    4.96
  31  -6  -3    2.72    1.08
 -31   6   3    2.52    1.15
 -30   6   3  100.90    4.79
  30   6  -3  102.31    4.58
  30  -6  -3  101.23    4.77
  29  -6  -3   27.06    2.24
 -29   6   3   28.49    2.63
  29  -6  -3   27.82    2.56
 -29   6   3   19.27    1.85
 -29  -6   3   20.64    1.93
  29   6  -3   30.55    2.32
  28  -6  -3  117.40    5.76
 -28  -6   3   98.19    5.15
  28  -6  -3  116.54    5.55
 -28   6   3   88.47    4.99
 -28   6   3  112.62    5.75
 -27  -6   3   17.66    2.24
  27  -6  -3   18.89    2.80
 -27   6   3   15.60    2.75
 -27   6   3   19.09    2.24
 -26  -6   3   33.57    3.08
  26  -6  -3   33.56    3.55
 -26   6   3   34.96    3.00
  25  -6  -3   22.97    2.72
  25  -6  -3   29.08    3.47
  25   6  -3   21.65    2.61
  24  -6  -3    0.94    2.67
  24   6  -3    6.43    2.20
  24  -6  -3    4.95    2.19
  23  -6  -3   14.37    2.63
  23   6  -3   15.34    2.55
  23  -6  -3   10.35    3.10
  22  -6  -3  325.30   14.62
  22  -6  -3  345.82   14.77
  22   6  -3  324.49   14.63
  21   6  -3   23.08    2.90
  21  -6  -3   23.58    2.96
  21  -6  -3   22.80    2.92
 -21  -6   3   27.81    2.96
 -20  -6   3 1236.90   47.38
  20   6  -3 1129.79   47.14
  20  -6  -3 1123.91   47.14
  20  -6  -3 1259.18   47.48
 -20   6   3 1108.25   47.17
  19  -6  -3   42.73    3.70
 -19   6   3   42.96    3.56
 -19  -6   3   44.87    3.62
  19  -6  -3   47.93    3.79
 -18  -6   3  177.20    8.14
 -18   6   3  161.29    8.02
 -18  -6   3  167.33    8.52
  18  -6  -3  150.09    7.95
  18  -6  -3  153.50    7.49
  18  -6  -3  164.08    8.18
  17  -6  -3   23.41    2.26
 -17  -6   3   26.67    3.38
 -17  -6   3   24.28    2.72
 -17   6   3   16.48    2.49
  17  -6  -3   18.93    2.68
  17  -6  -3   22.93    2.77
 -16   6   3  903.58   39.38
 -16  -6   3 1028.46   39.99
 -16  -6   3 1007.78   39.51
 -15  -6   3    9.65    2.01
 -15   6   3    9.84    1.89
 -14  -6   3 3593.35  137.41
 -14   6   3 3395.12  137.33
 -13   6   3   50.47    3.30
 -13  -6   3   57.73    3.43
 -12   6   3  135.97    6.45
 -12  -6   3  142.66    6.50
 -11   6   3  638.91   26.19
 -11  -6   3  664.05   26.26
 -10   6   3 3004.27  119.91
 -10  -6   3 3118.16  119.99
  -9   6   3    9.40    1.20
  -9  -6   3   10.43    1.39
  -9  -6   3   12.66    2.12
  -8   6   3 2535.85  102.30
  -8  -6   3 2673.12  102.36
  -8  -6   3 2663.10  102.95
  -7  -6   3 1252.56   48.70
   7   6  -3 1190.76   48.23
   7  -6  -3 1216.25   48.25
  -7  -6   3 1252.94   48.06
  -7   6   3 1203.69   48.02
  -6  -6   3    9.10    0.96
  -6   6   3   11.80    1.01
   6   6  -3    7.79    1.20
  -6  -6   3   11.16    2.06
   6  -6  -3    9.97    1.17
  -5   6   3  547.32   21.64
   5  -6  -3  553.39   21.80
   5   6  -3  520.14   21.77
  -5  -6   3  512.86   22.34
  -5  -6   3  571.74   21.63
  -4   6   3 3339.32  128.91
   4   6  -3 3157.14  129.00
  -4  -6   3 3188.37  129.58
   4  -6  -3 3308.96  129.02
  -4  -6   3 3380.30  128.90
   3   6  -3   70.95    3.22
  -3  -6   3   69.66    4.03
  -3  -6   3   79.46    3.15
   3  -6  -3   76.92    3.23
  -3   6   3   74.97    3.16
  -2  -6   3  521.89   21.25
  -2  -6   3  511.32   20.44
  -2   6   3  524.27   20.46
   2  -6  -3  553.22   21.19
  -1  -6   3 1909.75   76.89
   1  -6  -3 2019.25   77.52
  -1   6   3 2019.76   76.90
   0  -6  -3    4.91    1.61
   0  -6   3    2.70    0.69
   0   6   3    6.83    0.79
   1  -6   3  690.46   27.33
  -1  -6  -3  696.42   27.08
   1  -6   3  651.34   26.66
   1   6   3  683.18   26.66
  -2  -6  -3   20.89    1.36
  -2  -6  -3   23.82    1.92
   2   6   3   17.00    1.43
   2  -6   3   20.36    2.37
  -2   6  -3   15.82    1.33
  -3   6  -3   10.06    1.38
   3  -6   3   10.87    2.24
  -3  -6  -3   10.04    1.25
  -3   6  -3   11.76    1.28
  -3  -6  -3   10.16    1.43
  -3  -6  -3    7.68    1.56
  -4  -6  -3  256.22   10.06
  -4   6  -3  218.67    9.92
  -4  -6  -3  246.89   10.12
   4  -6   3  246.40   10.57
  -4   6  -3  222.49    9.96
  -4  -6  -3  253.95   10.02
  -5  -6  -3  109.89    4.97
  -5   6  -3   98.66    4.88
  -5  -6  -3  107.54    4.86
   5  -6   3  104.06    5.40
  -5   6  -3   99.33    4.81
  -5  -6  -3  104.18    4.87
   6  -6   3   99.63    5.28
  -6  -6  -3  109.43    5.03
  -6   6  -3   91.90    4.86
  -6   6  -3   96.39    4.80
  -6  -6  -3  108.28    4.85
  -6  -6  -3  108.24    4.95
  -7   6  -3  232.31   10.25
  -7  -6  -3  252.83   10.31
   7  -6   3  240.78   10.48
  -7  -6  -3  242.66   10.31
  -7  -6  -3  227.20   10.04
  -8  -6  -3    2.64    1.21
  -8  -6  -3    6.40    1.47
  -8  -6  -3    6.20    1.80
   8  -6   3    1.46    1.62
  -8   6  -3    6.35    1.68
  -9   6  -3  243.95   11.36
  -9  -6  -3  268.14   11.48
   9  -6   3  281.78   11.44
 -10  -6  -3  126.01    6.12
 -10   6  -3  112.82    6.00
  10  -6   3  131.68    5.91
  11  -6   3   96.19    4.67
 -11   6  -3   89.34    4.96
 -11  -6  -3   97.30    5.11
 -12  -6  -3  220.91    9.72
 -12   6  -3  203.82    9.60
 -13  -6  -3  121.74    6.19
 -13   6  -3  114.47    6.06
 -14   6  -3   44.56    3.44
  14   6   3   50.23    4.44
 -14  -6  -3   47.36    4.19
  14   6   3   48.80    3.70
 -14  -6  -3   49.16    3.54
  14  -6   3   43.48    3.95
  14   6   3   52.62    4.31
 -15  -6  -3 1529.96   58.56
 -15   6  -3 1425.55   58.39
  15   6   3 1448.12   58.59
  15  -6   3 1414.42   58.31
  15   6   3 1541.80   58.98
 -15  -6  -3 1434.57   58.95
  15   6   3 1400.56   58.30
  15  -6   3 1446.42   58.98
  15   6   3 1540.89   59.20
  16   6   3  112.44    6.36
 -16  -6  -3  114.56    6.88
 -16   6  -3  109.57    6.14
 -16  -6  -3  116.50    6.31
  16   6   3  133.47    7.24
  16  -6   3  130.27    7.13
  16  -6   3  109.32    6.14
  17  -6   3  407.20   17.59
 -17  -6  -3  391.88   17.52
  17   6   3  394.28   17.06
  17  -6   3  377.18   16.83
 -17  -6  -3  402.30   17.03
  17   6   3  426.71   17.75
 -17   6  -3  363.46   16.83
  17   6   3  386.62   16.82
  18  -6   3    8.34    2.44
  18   6   3    6.28    2.31
  18   6   3    4.55    3.16
  18  -6   3    8.60    2.72
 -18  -6  -3    9.50    3.02
  18  -6   3    4.93    2.79
  18   6   3   11.56    2.50
 -18  -6  -3   11.93    2.43
  19   6   3  521.93   21.78
 -19  -6  -3  500.97   21.11
  19   6   3  491.83   20.92
  19  -6   3  473.81   21.48
  19  -6   3  493.05   20.99
  19   6   3  498.68   21.07
 -19  -6  -3  511.71   21.62
  19  -6   3  479.79   21.27
  20  -6   3   15.21    3.12
  20   6   3   14.87    2.53
  20  -6   3   11.04    2.58
  20  -6   3   15.40    2.92
  20   6   3   14.93    3.59
  20   6   3   18.64    2.66
  21  -6   3 1626.32   64.81
  21   6   3 1575.31   64.16
  21   6   3 1632.01   64.28
  21   6   3 1645.19   64.90
  21  -6   3 1633.55   64.29
  21  -6   3 1555.31   64.39
  22  -6   3    3.13    2.15
  22   6   3    2.52    1.95
  22  -6   3    1.62    2.53
  22   6   3    2.40    1.90
  22   6   3    0.15    2.96
  22  -6   3    4.27    2.13
  23   6   3  263.34   11.73
  23  -6   3  286.81   12.38
  23   6   3  267.40   11.76
  23  -6   3  261.19   11.80
  23  -6   3  265.74   11.81
  24  -6   3  114.77    5.52
  24   6   3  110.03    5.39
  25  -6   3  244.15   11.16
  25   6   3  248.44   10.71
  25  -6   3  255.91   10.82
  26  -6   3    2.65    1.84
  26  -6   3    2.59    1.39
  26   6   3    3.24    1.30
  27  -6   3  424.08   17.64
  27  -6   3  462.67   18.05
  28   6   3   81.41    3.57
 -28   6  -3   74.24    3.77
  28  -6   3   77.21    3.75
  30  -7  -3   28.01    2.09
 -30   7   3   26.17    2.09
  30   7  -3   32.99    2.00
  29  -7  -3    7.01    1.81
  29  -7  -3    3.43    1.52
 -29   7   3    5.73    1.71
  29   7  -3    4.56    1.44
  28  -7  -3    4.29    1.88
 -28  -7   3    2.78    1.21
  28  -7  -3    2.41    1.92
 -28   7   3    2.71    1.94
 -27   7   3    5.43    2.31
 -27  -7   3    6.12    1.58
  27  -7  -3    6.34    2.26
  27  -7  -3   10.94    2.38
 -26  -7   3   35.60    2.89
  26  -7  -3   43.25    3.65
 -26   7   3   37.36    3.54
 -25   7   3   29.13    3.44
 -25  -7   3   22.92    2.63
  25  -7  -3   23.79    3.23
 -24  -7   3  171.48    8.38
  24  -7  -3  178.75    9.03
  23  -7  -3   30.65    3.81
  23  -7  -3   33.09    3.09
  22  -7  -3  235.76   10.59
  22  -7  -3  220.02   11.26
  21  -7  -3    4.09    2.90
  21  -7  -3    6.87    2.19
  20  -7  -3   41.43    3.55
  20  -7  -3   58.57    4.71
  19  -7  -3   10.48    2.36
  19  -7  -3   14.64    3.19
 -19  -7   3   12.29    2.19
  18  -7  -3 1098.99   47.39
  18  -7  -3 1270.11   48.46
 -18  -7   3 1163.88   47.48
 -18  -7   3 1245.34   48.18
  17  -7  -3   19.57    2.21
 -17  -7   3   24.91    3.31
 -17  -7   3   18.85    2.34
  17  -7  -3   24.65    3.55
  16  -7  -3  789.46   31.65
 -16  -7   3  762.22   31.57
  16  -7  -3  787.25   32.40
 -16  -7   3  758.10   32.16
 -15  -7   3    6.97    1.89
  15  -7  -3   13.71    2.80
 -15  -7   3    8.91    2.56
  15  -7  -3    9.49    1.90
 -14  -7   3  315.24   14.08
  14  -7  -3  358.01   14.57
 -13  -7   3   45.80    2.99
 -12  -7   3 4286.72  168.05
 -11  -7   3   21.60    1.77
 -10  -7   3  536.91   21.61
  -9  -7   3 1047.84   41.14
  -9  -7   3 1010.07   40.36
  -8  -7   3 1072.49   44.31
  -8  -7   3 1116.58   43.55
  -7  -7   3  125.28    6.22
  -7  -7   3  126.14    5.28
  -6  -7   3 2206.08   88.33
  -6  -7   3 2242.71   87.46
  -5  -7   3  251.77   10.09
  -5  -7   3  249.98   11.11
   5  -7  -3  275.02   11.21
  -4  -7   3  362.98   15.65
   4  -7  -3  381.38   15.67
  -3  -7   3 1036.11   42.36
   3  -7  -3 1080.16   42.33
  -2  -7   3  835.17   33.91
   2  -7  -3  847.42   33.84
   1  -7  -3   28.33    2.55
   0  -7  -3  532.96   21.74
  -1  -7  -3  743.93   29.60
   1  -7   3  724.17   29.88
   2  -7   3  339.57   13.27
  -2  -7  -3  339.90   12.85
  -3  -7  -3  186.32    7.92
  -3  -7  -3  201.87    8.50
   3  -7   3  207.35    9.00
   4  -7   3    2.57    2.13
  -4  -7  -3    5.16    1.11
  -4  -7  -3    5.93    1.55
  -5  -7  -3    8.25    1.39
  -5  -7  -3    6.92    1.57
   5  -7   3   12.13    2.29
   6  -7   3  225.07    9.85
  -6  -7  -3  211.06    9.17
  -6  -7  -3  214.62    9.32
  -7  -7  -3   42.67    2.74
  -7  -7  -3   45.60    2.78
   7  -7   3   43.41    3.18
   8  -7   3  192.20    8.79
  -8  -7  -3  197.98    8.40
  -8  -7  -3  182.69    8.40
  -9  -7  -3   13.12    1.86
  -9  -7  -3   11.43    1.55
   9  -7   3    7.08    1.84
 -10  -7  -3  102.28    5.15
  10  -7   3   98.27    5.14
 -11  -7  -3  123.17    5.96
  11  -7   3  114.67    5.76
 -12  -7  -3   50.94    4.14
 -12  -7  -3   52.05    3.47
  13   7   3  619.89   26.74
  13  -7   3  668.37   27.27
  13  -7   3  640.21   27.20
  13   7   3  673.52   27.34
 -13  -7  -3  606.84   27.08
 -13  -7  -3  656.46   26.53
  14   7   3  183.45    8.95
  14  -7   3  173.65    8.98
  14   7   3  187.63    9.14
  14   7   3  159.82    8.34
 -14  -7  -3  159.66    8.04
 -14  -7  -3  157.28    8.80
  14  -7   3  175.80    8.93
  15   7   3   34.37    3.39
 -15  -7  -3   33.67    3.03
  15  -7   3   38.48    3.97
 -15  -7  -3   38.97    4.13
  15   7   3   43.39    4.24
  15  -7   3   40.86    4.13
 -16  -7  -3   13.64    3.30
  16   7   3   20.56    3.59
  16  -7   3   19.25    3.33
  16  -7   3   16.90    2.46
 -16  -7  -3   20.19    2.49
  16  -7   3   15.63    3.27
  16   7   3   13.93    2.66
  17   7   3  673.57   27.79
  17  -7   3  608.85   27.54
 -17  -7  -3  670.09   26.97
  17   7   3  645.09   27.06
  17  -7   3  645.14   26.81
  17  -7   3  677.57   27.63
 -17  -7  -3  619.66   27.60
  18  -7   3   19.81    2.73
 -18  -7  -3   23.66    3.65
  18  -7   3   25.46    3.74
  18   7   3   26.61    3.01
  18  -7   3   23.06    3.44
  18   7   3   33.70    4.14
  19   7   3  710.94   29.61
  19  -7   3  681.76   28.74
  19  -7   3  716.02   29.61
  19   7   3  689.78   28.91
  19  -7   3  703.14   29.38
 -19  -7  -3  712.82   29.58
  20  -7   3    3.55    2.05
  20  -7   3   -0.16    2.70
  20   7   3    4.59    2.11
 -20  -7  -3    2.44    2.85
  20  -7   3    3.10    2.52
  20   7   3    2.32    3.11
  21  -7   3    2.42    2.26
  21   7   3    4.07    2.89
  21   7   3    1.52    1.92
  21  -7   3    1.26    2.04
  21  -7   3    1.40    2.56
  22  -7   3   39.06    3.42
  22  -7   3   47.69    3.34
  22   7   3   51.04    3.33
  22  -7   3   42.69    3.91
  23  -7   3  700.68   31.37
  23   7   3  801.58   31.36
  23  -7   3  812.16   31.99
  23  -7   3  797.17   31.35
  24  -7   3    1.45    1.54
  24  -7   3    2.37    1.56
  24  -7   3    1.72    2.11
  25  -7   3  333.41   14.25
  25  -7   3  372.87   14.91
  26  -7   3   85.85    4.53
  27  -7   3   15.42    1.66
 -27   7  -3   10.58    1.42
  28  -7   3   10.24    1.10
  30  -8  -3   80.85    3.86
  30   8  -3   85.88    3.79
  29  -8  -3   34.67    2.37
  29  -8  -3   40.61    2.61
 -29   8   3   34.28    2.41
  28  -8  -3  368.62   14.66
 -28   8   3  329.24   14.46
  28  -8  -3  340.89   14.48
  27  -8  -3    6.83    2.23
 -27   8   3    6.16    2.03
  27  -8  -3    7.83    2.13
  26  -8  -3   47.19    3.70
 -26   8   3   42.61    3.46
  26  -8  -3   47.66    3.66
  25  -8  -3    7.94    2.65
 -25   8   3    7.03    2.49
  25  -8  -3    2.80    2.57
 -24   8   3  254.03   11.93
  24  -8  -3  257.63   12.04
 -23   8   3   44.96    4.15
  23  -8  -3   48.40    4.34
  22  -8  -3  680.61   28.25
 -22   8   3  648.17   28.03
  21  -8  -3  120.79    7.30
  20  -8  -3  187.28    9.88
  19  -8  -3   36.21    4.18
 -18  -8   3  126.53    7.35
  18  -8  -3  134.07    7.75
  17  -8  -3    4.89    1.76
  17  -8  -3    6.06    3.01
 -17  -8   3    4.65    2.88
 -16  -8   3  404.64   18.04
  16  -8  -3  390.33   17.47
  16  -8  -3  445.06   18.46
  15  -8  -3  122.63    7.23
 -15  -8   3  127.37    7.16
  15  -8  -3  135.69    6.74
  14  -8  -3  545.90   23.13
 -14  -8   3  521.15   23.36
  14  -8  -3  594.64   23.72
  13  -8  -3  101.40    5.61
  12  -8  -3   14.00    2.41
  11  -8  -3    8.58    2.08
  10  -8  -3  159.64    8.01
 -10  -8   3  167.25    7.97
   9  -8  -3   38.41    3.21
  -9  -8   3   39.48    3.13
   8  -8  -3  214.26    9.89
  -8  -8   3  210.13    9.75
  -7  -8   3  150.57    7.33
  -6  -8   3  504.83   21.02
   5  -8  -3  110.95    5.77
  -5  -8   3  108.46    5.71
   4  -8  -3   23.42    2.59
  -4  -8   3   22.40    2.56
   3  -8  -3    8.87    2.19
  -3  -8   3   11.46    2.38
  -2  -8   3  696.11   29.00
   2  -8  -3  722.73   28.90
   1  -8  -3  304.91   13.09
   0  -8  -3  808.23   32.63
  -1  -8  -3 1078.12   43.33
   1  -8   3 1090.28   43.71
  -2  -8  -3    1.37    1.55
   2  -8   3    2.83    2.15
   3  -8   3  479.83   20.63
  -3  -8  -3  495.29   20.14
  -4  -8  -3  486.75   19.75
   4  -8   3  466.30   20.23
  -5  -8  -3  269.59   11.75
   5  -8   3  279.88   12.33
   6  -8   3  399.52   17.07
  -6  -8  -3  393.99   16.52
  -7  -8  -3 1773.25   71.24
   7  -8   3 1841.20   71.78
  -8  -8  -3   24.05    2.17
   8  -8   3   28.23    2.75
   9  -8   3  303.75   13.33
  10  -8   3   16.78    2.16
  11  -8   3  130.69    7.48
  11   8   3  135.66    7.58
  11  -8   3  132.11    7.34
  11  -8   3  135.53    6.63
 -11  -8  -3  138.66    7.41
  12  -8   3   66.11    4.83
  12   8   3   60.16    4.99
  12   8   3   61.65    4.27
  12  -8   3   65.66    5.15
 -12  -8  -3   70.13    5.01
  12   8   3   71.71    5.11
  13   8   3  788.38   31.58
 -13  -8  -3  731.02   31.43
  13  -8   3  748.80   31.52
  13   8   3  751.49   30.98
  13  -8   3  703.49   31.47
  13   8   3  777.38   31.59
  14  -8   3  111.40    6.96
  14  -8   3  119.31    7.10
  14   8   3  114.99    6.30
  14   8   3  105.82    6.82
 -14  -8  -3  121.71    7.10
  15   8   3  380.75   16.96
  15  -8   3  396.82   17.08
 -15  -8  -3  353.78   16.81
  15   8   3  348.67   16.16
  15  -8   3  391.21   17.10
  16   8   3   13.85    3.60
  16  -8   3   15.31    3.59
  16   8   3   20.24    2.80
  16  -8   3   21.04    3.65
 -16  -8  -3   17.07    3.69
  17   8   3  104.54    5.56
  17  -8   3   79.95    6.07
  17   8   3   93.47    6.28
 -17  -8  -3   93.19    6.25
  17  -8   3   85.57    6.09
  18   8   3   45.45    4.39
  18  -8   3   39.36    4.22
 -18  -8  -3   35.64    4.13
  18   8   3   36.09    3.34
  18  -8   3   43.12    4.18
  19   8   3  146.25    7.29
  19   8   3  152.10    8.15
  19  -8   3  138.33    8.02
  19  -8   3  141.95    7.89
 -19  -8  -3  151.02    8.16
  20   8   3   89.92    5.89
  20  -8   3   90.60    5.70
  20   8   3   87.58    5.04
  20  -8   3   98.48    6.00
 -20  -8  -3   95.15    5.95
  21  -8   3  186.50    9.01
  21   8   3  180.44    8.44
  21  -8   3  185.56    9.31
  22  -8   3   22.53    2.75
  22   8   3   20.53    2.12
  22  -8   3   18.63    3.10
  23   8   3   66.81    3.72
  23  -8   3   67.81    4.09
  23  -8   3   77.63    4.63
  24  -8   3    0.62    1.40
  24  -8   3    2.39    2.01
 -25   8  -3   23.61    2.08
  25  -8   3   28.14    2.50
  26  -8   3   25.32    2.11
 -26   8  -3   21.29    1.71
  27  -8   3   98.85    4.53
  29  -9  -3   16.29    1.52
  29   9  -3   18.89    1.40
  28  -9  -3   18.33    1.95
 -28   9   3   14.71    1.67
  28  -9  -3   16.79    1.86
  27  -9  -3  157.26    7.02
  27  -9  -3  144.46    6.92
 -27   9   3  138.46    6.73
 -26   9   3  439.75   19.35
  26  -9  -3  493.55   19.65
  26  -9  -3  470.49   19.60
 -25   9   3    4.94    2.14
  25  -9  -3    5.14    2.51
  25  -9  -3    4.53    2.35
  24  -9  -3  251.84   11.94
 -24   9   3  254.90   11.77
  24  -9  -3  267.04   12.05
  23  -9  -3    7.72    2.96
 -23   9   3    4.51    2.69
  23  -9  -3    5.51    2.77
  22  -9  -3  126.59    7.27
 -22   9   3  120.36    6.97
 -21   9   3    8.72    3.00
  21  -9  -3    8.11    3.12
  20  -9  -3  567.91   24.55
 -20   9   3  559.27   24.25
  19  -9  -3   53.07    5.00
 -19   9   3   57.66    4.75
 -18  -9   3   49.00    4.39
 -18   9   3   50.52    4.56
  18  -9  -3   59.23    5.02
  17  -9  -3   56.24    3.92
 -17   9   3   61.36    4.79
 -17  -9   3   62.55    4.84
  17  -9  -3   56.42    4.99
 -16   9   3  167.71    8.64
  16  -9  -3  154.80    7.99
  16  -9  -3  177.37    9.07
 -16  -9   3  154.05    8.43
 -15   9   3    0.47    2.39
  15  -9  -3    2.07    1.89
  15  -9  -3    0.71    2.66
 -15  -9   3   -1.89    2.50
  14  -9  -3   28.45    3.59
 -14  -9   3   26.27    3.22
 -14   9   3   26.53    3.20
 -14  -9   3   23.88    3.35
  14  -9  -3   24.86    2.92
  13  -9  -3  359.87   15.80
  13  -9  -3  376.36   16.11
 -13   9   3  358.13   15.72
 -13  -9   3  355.12   15.94
 -13  -9   3  337.59   15.83
  12  -9  -3   27.30    2.81
 -12  -9   3   16.90    2.91
  12  -9  -3   21.00    3.07
  11  -9  -3  244.44   11.39
 -10  -9   3   15.67    2.32
  10  -9  -3   14.31    2.43
  -9  -9   3   31.85    2.98
   9  -9  -3   26.55    3.02
  -8  -9   3  404.16   17.48
   8  -9  -3  411.46   17.65
  -7  -9   3   17.51    2.50
  -6  -9   3   46.65    3.49
   5  -9  -3   14.38    2.50
  -5  -9   3   18.01    2.34
   4  -9  -3  827.14   33.57
  -4  -9   3  817.85   33.59
   3  -9  -3   42.84    3.41
  -3  -9   3   50.04    3.65
   2  -9  -3  968.60   39.10
  -2  -9   3  964.99   39.26
   1  -9  -3  283.97   12.50
   0  -9  -3   88.57    4.84
   1  -9   3  122.51    6.68
  -1  -9  -3  125.81    6.24
   2  -9   3 1050.38   43.41
  -2  -9  -3 1081.16   42.94
   3  -9   3  759.90   31.46
  -3  -9  -3  759.15   30.90
   4  -9   3  320.95   14.51
  -4  -9  -3  326.18   13.92
  -5  -9  -3 1845.73   72.88
   5  -9   3 1823.80   73.48
  -6  -9  -3   37.97    2.77
   6  -9   3   33.77    3.52
   7  -9   3    6.23    2.31
  -7  -9  -3   14.97    1.92
  -8  -9  -3  369.18   15.70
   8  -9   3  372.74   16.25
   9  -9   3 1940.92   77.82
   9   9   3 2018.86   77.97
   9  -9   3 1881.57   77.26
  10  -9   3  130.59    7.31
  10   9   3  124.90    7.21
  10   9   3  117.90    6.38
  10  -9   3  117.45    6.32
  10   9   3  119.13    6.80
  11   9   3 1308.08   51.74
 -11  -9  -3 1205.03   51.62
  11   9   3 1347.16   52.08
  11  -9   3 1329.00   51.83
  11   9   3 1247.73   51.21
  11  -9   3 1279.79   52.02
  11  -9   3 1230.86   51.06
 -12  -9  -3   54.35    4.73
  12   9   3   67.50    5.03
  12   9   3   65.24    4.38
  12  -9   3   61.82    5.19
  12  -9   3   68.02    5.00
  13   9   3   80.66    5.73
  13  -9   3   74.53    5.64
  13  -9   3   68.69    5.68
  13   9   3   85.50    4.99
 -13  -9  -3   80.48    5.67
  14   9   3    0.94    2.17
  14   9   3   -1.94    3.07
  14  -9   3    3.40    3.19
 -14  -9  -3    5.68    3.37
  14  -9   3    2.14    3.16
  15  -9   3 1133.39   46.91
  15   9   3 1224.73   46.86
  15  -9   3 1118.48   46.90
  15   9   3 1120.89   46.08
 -15  -9  -3 1101.93   46.75
  16  -9   3  325.90   15.82
  16   9   3  350.28   15.78
 -16  -9  -3  332.78   15.80
  16   9   3  352.86   15.07
  16  -9   3  340.43   15.85
  17  -9   3  103.91    6.62
  17   9   3  100.20    6.37
  17  -9   3  115.57    6.66
 -17  -9  -3   97.43    6.47
  17   9   3   88.58    5.41
  18   9   3  143.24    7.72
  18  -9   3  128.34    7.65
 -18  -9  -3  128.87    7.60
  18   9   3  136.92    6.78
  18  -9   3  128.22    7.53
 -19  -9  -3  118.06    6.93
  19  -9   3  107.53    6.68
  19   9   3  119.97    5.97
  19  -9   3  112.40    6.92
  20  -9   3   23.34    3.31
 -20  -9  -3   26.41    3.46
  20  -9   3   19.36    3.16
  21  -9   3   45.99    3.76
  21  -9   3   47.21    3.98
  22  -9   3  180.27    8.86
  22  -9   3  185.61    8.61
  23  -9   3    6.25    2.09
 -23   9  -3    5.32    1.62
  23  -9   3    7.22    1.81
  24  -9   3   56.92    3.15
 -24   9  -3   53.18    3.07
  25  -9   3    8.25    1.66
  26  -9   3   32.08    2.12
  28  10  -3   90.34    3.84
  28 -10  -3   84.54    3.98
 -27  10   3   24.33    1.85
  27 -10  -3   29.41    2.35
  27 -10  -3   32.34    2.35
  26 -10  -3   15.33    2.17
  26 -10  -3   12.90    2.25
 -26  10   3   12.12    1.82
 -25  10   3   19.06    2.27
  25 -10  -3   19.43    2.72
  25 -10  -3   21.57    2.69
  24 -10  -3   66.34    4.57
 -24  10   3   67.72    4.23
  24 -10  -3   69.18    4.65
  23 -10  -3   71.12    4.87
 -23  10   3   65.34    4.54
  22 -10  -3  161.77    8.44
 -22  10   3  155.02    8.09
  21 -10  -3  291.99   13.48
 -21  10   3  277.12   13.13
  20 -10  -3   15.85    3.57
  20 -10  -3   18.09    3.55
 -20  10   3   15.16    3.12
 -19  10   3   65.35    5.01
  19 -10  -3   57.67    5.25
  19 -10  -3   76.38    5.72
  18 -10  -3   51.01    4.97
  18 -10  -3   39.01    4.63
 -18 -10   3   44.03    4.08
 -18  10   3   43.04    4.21
  17 -10  -3   64.73    5.36
 -17 -10   3   65.52    4.89
  17 -10  -3   60.60    5.48
 -17  10   3   67.33    5.08
 -16  10   3   27.55    3.51
 -16 -10   3   24.39    3.40
  16 -10  -3   25.61    3.81
  16 -10  -3   23.49    4.12
  16 -10  -3   24.62    2.85
  15 -10  -3  311.21   15.18
  15 -10  -3  317.63   14.88
  15 -10  -3  323.01   14.33
 -15 -10   3  307.48   14.49
 -15  10   3  324.39   14.54
 -14 -10   3   18.61    3.19
  14 -10  -3   19.18    3.74
  14 -10  -3   23.09    3.48
 -14 -10   3   13.56    3.03
  14 -10  -3   18.13    2.81
 -13 -10   3  295.90   13.78
  13 -10  -3  299.95   13.63
 -13 -10   3  279.73   13.58
  13 -10  -3  304.29   14.31
  13 -10  -3  305.00   13.89
  12 -10  -3  139.17    7.35
 -12 -10   3  121.90    7.17
  12 -10  -3  138.23    7.46
 -12 -10   3  141.79    7.48
  12 -10  -3  128.32    7.68
  11 -10  -3  166.21    8.55
 -11 -10   3  151.80    8.27
 -11 -10   3  140.40    7.96
  11 -10  -3  157.74    8.07
  11 -10  -3  163.78    8.25
  10 -10  -3   50.76    4.00
 -10 -10   3   51.33    4.21
  10 -10  -3   47.95    4.19
  10 -10  -3   48.00    4.05
 -10 -10   3   51.90    3.92
  -9 -10   3  423.53   19.44
  -9 -10   3  456.46   19.34
   9 -10  -3  457.45   19.25
   9 -10  -3  448.44   19.51
   9 -10  -3  453.94   19.56
   8 -10  -3  232.84   10.85
  -8 -10   3  221.09   10.55
  -7 -10   3   80.20    4.92
  -6 -10   3  430.79   18.55
  -5 -10   3   67.91    4.57
   5 -10  -3   72.96    4.70
   4 -10  -3  154.52    7.73
  -4 -10   3  146.18    7.58
  -3 -10   3   59.80    4.18
   3 -10  -3   57.88    4.01
   2 -10  -3  393.98   16.90
  -2 -10   3  388.55   17.08
   1 -10  -3  434.29   18.53
   0 -10  -3  968.56   39.32
  -1 -10  -3  627.10   26.55
   1 -10   3  663.79   27.17
  -2 -10  -3   77.97    4.74
   2 -10   3   87.48    5.48
   3 -10   3  105.79    6.14
  -3 -10  -3   88.68    5.20
   4 -10   3   11.88    2.73
  -4 -10  -3   11.72    2.13
   5 -10   3  428.36   18.98
  -5 -10  -3  433.84   18.31
  -6 -10  -3  754.93   31.59
   6 -10   3  798.62   32.36
  -6 -10  -3  778.90   31.92
   7  10   3  406.94   18.27
  -7 -10  -3  427.34   17.90
   7 -10   3  421.22   18.15
  -7 -10  -3  395.03   17.41
  -8 -10  -3  476.50   20.31
   8  10   3  459.80   20.61
   8 -10   3  482.05   20.58
   8 -10   3  467.39   20.29
  -8 -10  -3  468.61   19.72
   8 -10   3  461.72   20.60
   9 -10   3   28.18    3.55
   9 -10   3   30.07    3.25
  -9 -10  -3   33.37    3.68
   9 -10   3   38.70    4.15
  10 -10   3    5.68    3.21
  10 -10   3    8.38    2.16
  11  10   3  154.22    8.08
  11 -10   3  144.57    8.71
  12 -10   3  194.15   10.35
  12  10   3  193.82    9.82
  13  10   3  518.01   22.49
  13 -10   3  518.68   22.97
  14  10   3  632.83   26.20
 -14 -10  -3  599.42   26.28
  14 -10   3  598.85   26.48
 -15 -10  -3   39.67    4.47
  15 -10   3   46.74    4.81
  16 -10   3   77.14    5.80
 -16 -10  -3   78.82    5.70
 -17 -10  -3  127.81    7.39
  17 -10   3  121.01    7.43
  17 -10   3  124.34    7.43
  18 -10   3  133.72    7.82
 -18 -10  -3  141.86    7.85
  18 -10   3  140.60    7.85
  19 -10   3  147.31    7.97
  19 -10   3  153.80    8.11
 -19 -10  -3  146.77    8.02
  20 -10   3  245.96   11.85
 -20 -10  -3  260.75   11.91
  20 -10   3  256.91   11.76
  21 -10   3   32.57    3.14
  21 -10   3   32.51    3.30
  22 -10   3  186.47    8.76
  22 -10   3  198.97    9.05
  23 -10   3    2.11    1.50
  23 -10   3   -1.66    1.81
  24 -10   3    9.74    1.71
  24 -10   3    5.32    1.14
  25 -10   3    2.66    1.27
  27 -11  -3   27.44    2.02
  27 -11  -3   30.08    1.98
  27  11  -3   31.22    1.79
  26 -11  -3    4.45    1.54
  26 -11  -3    1.74    1.61
  25 -11  -3  137.46    6.18
  25 -11  -3  139.04    6.26
 -24  11   3    2.67    1.54
  24 -11  -3    3.03    2.04
 -23  11   3  135.18    6.79
  23 -11  -3  151.35    7.36
  22 -11  -3   64.61    4.61
 -22  11   3   59.40    4.07
  21 -11  -3   35.00    3.92
 -21  11   3   33.18    3.37
  21 -11  -3   34.06    3.84
  20 -11  -3   50.48    4.56
 -20  11   3   45.24    4.07
  20 -11  -3   51.57    4.74
  19 -11  -3  317.06   14.82
 -19  11   3  317.88   14.30
  19 -11  -3  302.60   14.64
 -18 -11   3  106.73    6.27
 -18  11   3  105.62    6.38
  18 -11  -3  102.31    6.92
  18 -11  -3  105.73    6.86
  17 -11  -3   74.21    6.15
  17 -11  -3   80.63    6.00
 -17 -11   3   77.55    5.32
 -17  11   3   89.91    5.58
  16 -11  -3  341.78   16.01
  16 -11  -3  354.28   16.41
 -16 -11   3  337.59   15.52
  15 -11  -3    2.26    3.06
  15 -11  -3    2.87    2.02
 -15 -11   3    3.57    2.71
  15 -11  -3    2.82    3.57
 -15 -11   3    3.35    2.63
 -14 -11   3   41.85    4.05
  14 -11  -3   38.19    4.97
  14 -11  -3   40.78    4.24
  14 -11  -3   45.51    3.87
 -14 -11   3   40.16    4.05
 -13 -11   3  297.94   14.23
  13 -11  -3  316.24   14.25
  13 -11  -3  309.16   14.39
 -13 -11   3  294.11   14.10
  13 -11  -3  326.93   14.96
 -12 -11   3  275.83   13.07
 -12 -11   3  250.48   12.69
  12 -11  -3  283.30   13.00
  12 -11  -3  262.68   12.83
  11 -11  -3  695.29   27.98
  11 -11  -3  661.24   28.29
  11 -11  -3  681.70   28.19
 -11 -11   3  659.51   28.11
 -11 -11   3  617.06   27.75
 -10 -11   3  524.85   22.32
  10 -11  -3  541.14   22.71
  10 -11  -3  548.68   22.36
 -10 -11   3  493.91   22.19
 -10 -11   3  497.99   22.47
  10 -11  -3  512.02   22.55
   9 -11  -3   66.05    5.05
  -9 -11   3   77.41    4.91
  -9 -11   3   79.43    5.35
  -9 -11   3   70.90    4.95
   9 -11  -3   70.89    4.85
   9 -11  -3   71.37    5.12
  -8 -11   3    1.55    2.15
   8 -11  -3    4.70    2.53
   8 -11  -3    4.22    2.65
  -8 -11   3    0.14    2.40
  -8 -11   3    6.31    2.70
   8 -11  -3    6.58    2.24
   7 -11  -3  205.28   10.07
   7 -11  -3  213.20    9.87
  -7 -11   3  191.25   10.24
  -7 -11   3  212.89   10.11
  -6 -11   3   86.67    5.22
   6 -11  -3   90.79    5.50
  -6 -11   3   84.88    5.66
  -6 -11   3   78.07    5.20
   6 -11  -3   91.47    5.19
   5 -11  -3 1120.64   44.66
  -5 -11   3 1135.35   44.92
   5 -11  -3 1128.47   44.49
   5 -11  -3 1085.06   44.92
  -5 -11   3 1024.78   45.02
  -5 -11   3 1089.65   44.56
  -4 -11   3   43.67    4.29
  -4 -11   3   40.59    3.77
  -4 -11   3   40.07    3.39
   4 -11  -3   37.43    3.53
  -3 -11   3  428.01   19.53
   3 -11  -3  448.04   19.24
  -3 -11   3  436.40   18.91
  -3 -11   3  457.11   19.39
  -2 -11   3   81.83    5.24
  -2 -11   3   83.81    5.32
  -2 -11   3   99.44    5.73
   2 -11  -3   87.60    5.30
  -2 -11   3   90.25    5.90
   1 -11  -3  591.43   23.63
  -1 -11   3  550.47   23.38
  -1 -11   3  530.75   23.49
   0 -11   3   21.40    2.75
   0 -11   3   18.00    2.96
   0 -11   3   19.20    3.27
   0 -11  -3   19.61    2.60
  -1 -11  -3 1428.35   58.80
  -1 -11  -3 1466.62   58.60
   1 -11   3 1442.17   58.50
   1 -11   3 1443.51   58.74
   1 -11   3 1503.37   59.19
   1 -11   3 1475.13   59.46
   2 -11   3   47.14    4.13
   2 -11   3   51.82    4.75
  -2 -11  -3   41.29    3.45
   2 -11   3   43.37    4.02
  -2 -11  -3   48.67    3.96
   2 -11   3   47.89    3.83
   3 -11   3  177.83    9.62
   3 -11   3  195.38    9.21
   3 -11   3  182.57   10.02
   3 -11   3  197.33    9.53
  -3 -11  -3  184.84    8.88
  -3 -11  -3  188.45    9.10
  -3 -11  -3  190.48    9.39
   4 -11   3  245.84   11.43
  -4 -11  -3  234.72   11.18
   4 -11   3  255.41   12.39
  -4 -11  -3  244.40   11.33
  -4 -11  -3  237.44   11.42
   4 -11   3  254.86   11.76
   4 -11   3  241.31   11.90
   5 -11   3  473.23   21.40
  -5 -11  -3  486.59   20.61
   5 -11   3  477.66   21.12
  -5 -11  -3  479.15   20.62
  -5 -11  -3  496.82   20.46
   5 -11   3  463.97   20.94
   6 -11   3  476.55   21.61
   6 -11   3  475.84   21.30
  -6 -11  -3  493.36   20.96
   6 -11   3  507.48   21.48
  -6 -11  -3  489.00   20.86
  -6 -11  -3  482.22   20.64
  -7 -11  -3  425.54   18.34
  -7 -11  -3  425.39   18.75
   7 -11   3  429.70   19.05
   7 -11   3  440.39   19.40
  -8 -11  -3  125.53    7.11
   8 -11   3  129.47    7.10
   8 -11   3  120.62    7.31
   9 -11   3   51.70    4.46
  -9 -11  -3   48.78    4.33
   9 -11   3   47.32    3.99
  10 -11   3  491.85   21.37
  10 -11   3  472.96   20.48
 -10 -11  -3  462.22   20.86
  10 -11   3  477.45   20.74
  11 -11   3    9.37    3.50
  12 -11   3  155.46    9.18
  13 -11   3   94.75    6.79
  14 -11   3    2.49    3.41
  15 -11   3   48.13    4.91
  16 -11   3  216.36   10.99
 -16 -11  -3  210.25   10.70
 -17 -11  -3   88.97    5.89
  17 -11   3   89.97    6.03
 -18 -11  -3   83.95    5.60
  18 -11   3   88.93    5.70
 -19 -11  -3  154.55    7.83
  19 -11   3  142.67    7.74
  20 -11   3   29.35    3.24
  20 -11   3   37.10    3.35
  21 -11   3    1.09    2.02
  21 -11   3    0.30    1.91
  22 -11   3   19.76    2.15
  22 -11   3   21.57    2.34
  23 -11   3   64.26    3.50
  23 -11   3   54.02    3.07
  24 -11   3  216.61    9.24
  26 -12  -3    4.31    1.06
  26 -12  -3    3.36    1.20
  25 -12  -3   25.71    2.31
  25 -12  -3   28.83    2.20
  24 -12  -3  112.79    5.62
  23 -12  -3  283.61   12.45
  22 -12  -3   50.82    3.82
  22 -12  -3   49.18    3.94
  21 -12  -3  579.52   25.23
  21 -12  -3  620.41   25.28
  20 -12  -3   96.19    6.01
  20 -12  -3   95.70    6.09
  19 -12  -3   17.10    3.64
  19 -12  -3   19.36    3.40
  18 -12  -3  241.67   12.01
  18 -12  -3  229.22   11.76
  18 -12  -3  244.75   11.06
  17 -12  -3  178.83   10.17
 -17 -12   3  196.01    9.51
  17 -12  -3  185.49    9.91
  17 -12  -3  194.99    9.41
  16 -12  -3    8.41    3.40
  16 -12  -3   11.26    3.83
 -16 -12   3    8.26    2.71
  15 -12  -3  441.88   19.80
  15 -12  -3  454.81   20.27
 -15 -12   3  432.35   19.33
 -15 -12   3  450.44   19.46
 -14 -12   3  468.69   21.35
  14 -12  -3  497.05   21.74
 -14 -12   3  492.79   21.40
  14 -12  -3  526.68   22.32
  13 -12  -3  245.65   12.45
  13 -12  -3  258.69   12.42
 -13 -12   3  268.22   12.49
  13 -12  -3  264.58   13.08
 -13 -12   3  255.64   12.28
  12 -12  -3  172.73    8.99
  12 -12  -3  167.74    8.88
 -12 -12   3  165.78    8.74
  12 -12  -3  164.34    9.33
 -12 -12   3  163.96    8.96
 -11 -12   3   19.00    3.57
  11 -12  -3    9.61    2.93
 -11 -12   3   14.80    3.01
  11 -12  -3    9.81    3.36
  11 -12  -3   12.11    2.98
  10 -12  -3  174.19    8.74
 -10 -12   3  156.72    9.04
  10 -12  -3  165.46    9.06
 -10 -12   3  160.33    8.68
  10 -12  -3  176.71    9.17
   9 -12  -3  704.59   30.46
  -9 -12   3  730.46   30.21
  -9 -12   3  671.32   29.91
   9 -12  -3  742.74   30.41
  -9 -12   3  722.16   30.47
   9 -12  -3  735.37   30.03
  -8 -12   3  325.15   15.82
   8 -12  -3  368.73   15.81
   8 -12  -3  368.55   15.56
  -8 -12   3  324.24   15.41
   8 -12  -3  328.44   15.89
  -8 -12   3  349.10   15.65
  -7 -12   3  921.15   39.63
   7 -12  -3 1000.66   39.18
  -7 -12   3  938.45   39.37
   7 -12  -3  943.66   39.31
  -6 -12   3   17.94    3.30
  -6 -12   3   11.25    2.51
   6 -12  -3   12.93    2.69
   6 -12  -3   13.49    2.90
   5 -12  -3   29.17    3.45
  -5 -12   3   28.36    3.33
   5 -12  -3   28.16    3.60
  -5  12   3   27.24    2.78
   5 -12  -3   32.73    3.32
  -5 -12   3   33.65    3.97
  -5 -12   3   30.41    3.43
  -4 -12   3    6.89    3.24
  -4 -12   3    4.84    2.60
   4 -12  -3    2.71    2.40
   4 -12  -3    2.65    2.24
  -4 -12   3    8.36    2.64
   4 -12  -3    8.05    2.74
  -4  12   3    4.40    1.80
  -3  12   3 1102.91   44.55
  -3 -12   3 1081.15   45.79
   3 -12  -3 1125.58   44.89
  -3 -12   3 1113.64   45.09
  -3 -12   3 1106.00   45.50
   3 -12  -3 1120.69   45.00
   3 -12  -3 1086.78   45.31
   2 -12  -3   14.67    2.71
  -2 -12   3   12.09    3.19
  -2 -12   3   14.78    3.11
   2 -12  -3   14.02    2.89
  -2 -12   3   14.21    3.99
   2 -12  -3   17.35    2.68
  -2  12   3   13.16    2.06
  -2 -12   3   16.56    3.11
   1 -12  -3  869.64   36.78
  -1 -12   3  915.24   36.90
   1 -12  -3  886.35   37.09
   1 -12  -3  876.95   36.37
  -1 -12   3  909.37   36.72
   0 -12   3   70.95    4.87
   0 -12   3   69.60    5.82
   0 -12  -3   63.38    4.47
   0 -12   3   63.37    5.06
   0 -12  -3   71.64    4.74
   0 -12  -3   65.94    5.02
   1 -12   3   37.61    3.66
   1 -12   3   46.30    4.44
  -1 -12  -3   46.08    4.14
   1 -12   3   41.29    4.01
  -1 -12  -3   46.51    3.74
  -1 -12  -3   38.14    3.49
   1 -12   3   50.74    5.14
  -2 -12  -3  165.99    8.54
   2 -12   3  187.84    9.12
   2 -12   3  189.92   10.16
  -2 -12  -3  174.87    8.95
   2 -12   3  176.34    9.29
   2 -12   3  186.11    9.64
  -2 -12  -3  178.55    9.32
   3 -12   3  702.75   30.86
  -3 -12  -3  732.17   29.87
   3 -12   3  720.30   30.20
   3 -12   3  732.17   29.95
   3 -12   3  700.37   30.50
  -3 -12  -3  716.99   30.10
  -3 -12  -3  698.21   29.81
   4 -12   3  131.87    8.11
  -4 -12  -3  113.87    6.65
  -4 -12  -3  128.48    7.02
   4 -12   3  134.77    7.11
  -4 -12  -3  125.65    7.09
   4 -12   3  127.09    7.36
   4 -12   3  116.73    7.47
  -5 -12  -3  166.16    8.55
  -5 -12  -3  155.38    8.15
   5 -12   3  165.42    9.01
  -5 -12  -3  175.69    8.65
   5 -12   3  152.99    8.47
   5 -12   3  165.94    8.92
   5 -12   3  168.41    9.49
  -6 -12  -3  248.34   11.93
   6 -12   3  240.55   12.31
  -6 -12  -3  246.11   11.66
   6 -12   3  265.46   12.12
   6 -12   3  261.06   12.82
   6 -12   3  259.87   12.58
  -6 -12  -3  258.36   12.10
  -7 -12  -3  349.32   16.35
   7 -12   3  373.76   17.17
   7 -12   3  369.47   16.89
  -7 -12  -3  361.92   16.17
  -7 -12  -3  383.91   16.73
   7 -12   3  378.31   17.24
   7 -12   3  387.74   16.79
   8 -12   3  477.72   21.52
  -8 -12  -3  518.85   21.39
   8 -12   3  487.96   21.27
   8 -12   3  461.90   21.16
   9 -12   3  310.66   14.59
   9 -12   3  300.81   14.20
  -9 -12  -3  321.08   14.57
  10 -12   3   74.82    5.42
 -10 -12  -3   82.88    5.77
  11 -12   3   13.54    4.00
  11 -12   3    9.22    2.68
 -11 -12  -3   10.81    3.43
  12 -12   3  133.44    8.36
 -12 -12  -3  140.35    7.99
 -13 -12  -3   96.32    6.44
  13 -12   3   92.49    6.71
  14 -12   3  478.93   21.45
  15 -12   3    8.09    3.51
  16 -12   3  146.18    8.28
  17 -12   3   74.53    5.40
  18 -12   3    6.86    2.71
 -19 -12  -3    5.05    2.37
  19 -12   3    4.57    2.52
  20 -12   3  167.04    7.99
  21 -12   3   69.42    3.98
  22 -12   3  257.90   11.28
  22 -12   3  285.49   11.55
  23 -12   3   25.47    1.95
  24 -13  -3    0.58    1.26
  23 -13  -3   78.12    4.41
  23 -13  -3   81.82    4.31
  22 -13  -3    2.35    2.09
  22 -13  -3    2.35    1.93
  21 -13  -3   76.29    4.86
  21 -13  -3   80.39    4.85
  20 -13  -3    2.45    2.49
  20 -13  -3    1.79    2.69
  19 -13  -3  298.76   13.70
  19 -13  -3  295.01   13.52
  18 -13  -3    6.89    2.14
  18 -13  -3    5.05    2.99
  18 -13  -3    5.19    3.30
  17 -13  -3  146.67    8.57
  17 -13  -3  145.17    8.25
  17 -13  -3  158.42    7.76
  16 -13  -3    8.98    2.73
  16 -13  -3    8.77    3.69
  16 -13  -3    4.87    3.13
 -16 -13   3   12.87    2.75
 -15 -13   3   41.56    3.80
  15 -13  -3   46.74    5.00
  15 -13  -3   43.71    4.33
 -15 -13   3   48.08    4.10
  15 -13  -3   43.51    4.07
  14 -13  -3   36.04    4.15
  14 -13  -3   43.25    4.97
 -14 -13   3   38.37    3.81
  14 -13  -3   33.66    4.14
 -14 -13   3   40.54    3.96
  13 -13  -3  646.34   28.00
  13 -13  -3  643.26   27.50
 -13 -13   3  637.22   27.42
 -13 -13   3  655.13   27.28
 -12 -13   3   10.39    3.12
  12 -13  -3    6.91    3.10
  12 -13  -3    6.36    3.70
 -12 -13   3    7.05    2.78
 -11 -13   3  390.60   17.61
  11 -13  -3  401.18   17.84
  11 -13  -3  383.35   17.30
 -11 -13   3  369.27   17.11
 -10 -13   3   11.48    3.34
  10 -13  -3   11.83    3.07
 -10 -13   3   11.31    3.14
  10 -13  -3   19.72    3.24
  10 -13  -3   12.10    3.57
  -9 -13   3    2.58    3.46
   9 -13  -3   -2.96    3.38
   9 -13  -3    0.81    2.57
   9 -13  -3   -1.28    2.51
  -9 -13   3   -0.16    2.78
  -8 -13   3  168.98    9.38
   8 -13  -3  160.24    9.31
   8 -13  -3  163.79    9.10
   8 -13  -3  177.28    8.90
  -8 -13   3  179.02    9.10
  -7 -13   3  467.16   21.01
   7 -13  -3  484.82   20.41
  -7 -13   3  465.72   20.70
   7 -13  -3  437.58   20.79
   7 -13  -3  461.59   20.54
  -7  13   3  481.63   19.98
  -6  13   3  117.05    6.23
   6 -13  -3  115.31    6.89
  -6 -13   3  110.82    7.36
   6 -13  -3  112.62    6.69
  -6 -13   3  122.42    7.08
   5 -13  -3  461.66   20.02
  -5 -13   3  455.22   20.32
  -5 -13   3  452.05   20.68
   5 -13  -3  464.04   19.88
   5 -13  -3  455.75   20.37
  -5  13   3  453.51   19.40
  -4 -13   3   51.81    5.21
  -4  13   3   47.93    3.57
   4 -13  -3   51.37    4.40
   4 -13  -3   45.54    4.83
   4 -13  -3   49.20    4.12
  -4 -13   3   45.72    4.24
  -4 -13   3   56.14    4.73
   4 -13  -3   50.89    4.28
  -3 -13   3    8.85    3.94
   3 -13  -3   13.16    2.87
  -3  13   3    8.51    2.06
  -3 -13   3    5.96    2.93
   3 -13  -3   11.25    3.51
   3 -13  -3    4.73    2.74
  -3 -13   3    4.84    2.85
   3 -13  -3    6.33    2.65
   2 -13  -3  383.98   16.93
  -2 -13   3  392.91   17.22
  -2 -13   3  384.63   17.64
   2 -13  -3  385.16   17.42
   2 -13  -3  378.23   17.74
  -2 -13   3  400.10   18.14
   2 -13  -3  377.39   16.92
  -1 -13   3  314.05   14.64
   1 -13  -3  320.00   15.13
   1 -13  -3  316.04   14.35
   1 -13  -3  331.40   14.85
   0 -13   3  136.03    8.09
   0 -13  -3  126.59    7.07
   0 -13  -3  134.25    7.89
   0 -13   3  135.41    7.65
   0 -13   3  134.25    7.52
   0 -13  -3  136.09    7.50
  -1 -13  -3  212.98   11.07
  -1 -13  -3  221.05   10.43
  -1 -13  -3  207.51   10.66
   1 -13   3  223.00   10.85
  -1 -13  -3  228.18   10.65
   1 -13   3  220.20   11.41
   1 -13   3  226.42   11.14
   1 -13   3  217.50   11.84
   2 -13   3   40.38    4.52
   2 -13   3   37.16    4.13
  -2 -13  -3   40.26    3.85
  -2 -13  -3   45.99    4.35
  -2 -13  -3   47.92    4.00
   2 -13   3   38.29    4.27
   2 -13   3   40.33    4.99
   3 -13   3   29.94    4.64
   3 -13   3   23.63    3.85
  -3 -13  -3   22.92    3.26
  -3 -13  -3   21.04    3.45
  -3 -13  -3   23.54    2.97
   3 -13   3   28.17    3.91
   3 -13   3   17.44    3.28
   4 -13   3  260.10   13.65
  -4 -13  -3  288.76   13.05
  -4 -13  -3  274.27   12.68
   4 -13   3  281.39   13.25
   4 -13   3  259.46   13.26
   4 -13   3  272.91   12.89
  -4 -13  -3  260.13   12.66
  -5 -13  -3   10.39    3.10
  -5 -13  -3   10.14    2.56
   5 -13   3   12.95    3.59
   5 -13   3    9.80    3.80
   5 -13   3    7.75    2.95
   5 -13   3   11.95    3.26
  -5 -13  -3   10.19    2.90
   6 -13   3   59.49    4.81
  -6 -13  -3   62.97    4.75
   6 -13   3   59.15    4.95
   6 -13   3   63.39    5.28
  -6 -13  -3   62.52    4.36
  -6 -13  -3   63.49    4.91
   6 -13   3   61.16    5.45
  -7 -13  -3  205.11   10.30
   7 -13   3  212.65   10.43
   7 -13   3  201.16   10.80
   7 -13   3  235.39   11.13
   7 -13   3  190.63   10.32
  -7 -13  -3  192.96   10.00
   8 -13   3   13.31    3.24
  -8 -13  -3    9.94    2.71
   8 -13   3    8.07    2.69
  -8 -13  -3    9.96    3.09
   8 -13   3    9.41    3.90
   8 -13   3   10.99    3.29
  -9 -13  -3  166.04    9.04
   9 -13   3  167.89    9.00
   9 -13   3  162.04    8.97
  10 -13   3  211.77   10.75
 -10 -13  -3  207.43   10.72
  10 -13   3  211.80   10.54
  11 -13   3   14.66    3.41
  11 -13   3    8.45    2.63
 -11 -13  -3    8.54    3.24
  12 -13   3  383.09   17.61
 -12 -13  -3  392.27   17.56
 -13 -13  -3  182.40    9.73
  13 -13   3  196.38   10.32
 -14 -13  -3    9.32    3.19
  14 -13   3    9.80    3.42
  15 -13   3   25.72    4.00
 -15 -13  -3   27.86    3.50
  16 -13   3  235.09   11.39
  17 -13   3   24.67    3.28
  18 -13   3  286.49   12.86
  19 -13   3   31.10    2.96
  20 -13   3    8.00    1.90
  21 -13   3    4.68    1.43
  22 -13   3   69.41    3.48
  23 -14  -3  118.93    5.39
  23 -14  -3  113.26    5.18
  22 -14  -3   14.95    1.78
 -22  14   3   13.12    1.35
  22 -14  -3   14.54    1.99
  21 -14  -3  188.08    8.73
  21 -14  -3  190.61    8.59
  20 -14  -3   95.73    5.45
  20 -14  -3   95.02    5.29
  19 -14  -3   24.99    2.97
  19 -14  -3   23.57    3.20
  18 -14  -3   83.95    4.47
  18 -14  -3   85.78    5.25
  18 -14  -3   73.67    5.39
  17 -14  -3  178.02    8.66
  17 -14  -3  190.02    9.57
  17 -14  -3  186.58    9.23
  16 -14  -3  131.36    7.66
  16 -14  -3  121.19    7.20
  16 -14  -3  133.07    6.89
 -15 -14   3  449.13   20.08
  15 -14  -3  480.84   20.49
  15 -14  -3  475.58   20.65
 -15 -14   3  494.47   20.16
  15 -14  -3  465.27   21.01
 -14 -14   3  294.96   13.61
  14 -14  -3  288.80   13.87
  14 -14  -3  319.06   14.06
  14 -14  -3  283.41   14.28
 -14 -14   3  305.62   13.47
 -13 -14   3   17.47    3.22
  13 -14  -3   17.79    3.95
 -13 -14   3   20.25    2.89
  13 -14  -3   16.77    3.33
  13 -14  -3   21.47    3.73
  12 -14  -3    9.71    3.44
 -12 -14   3    5.07    2.83
  12 -14  -3   -0.20    3.39
 -12 -14   3    1.43    2.38
  12 -14  -3    4.70    2.91
  11 -14  -3  261.94   13.27
 -11 -14   3  274.52   12.96
  11 -14  -3  269.57   12.66
  11 -14  -3  253.02   12.97
 -11 -14   3  265.08   12.37
  10 -14  -3  706.64   31.04
 -10 -14   3  742.19   31.25
  10 -14  -3  762.62   31.70
 -10  14   3  760.22   30.41
 -10 -14   3  717.43   30.51
  10 -14  -3  709.97   30.74
   9 -14  -3  557.90   23.98
   9 -14  -3  549.32   24.88
   9 -14  -3  552.89   24.24
  -9  14   3  566.66   23.56
  -9 -14   3  559.91   24.48
   8 -14  -3  177.57    9.48
  -8 -14   3  197.62   10.24
   8 -14  -3  185.51   10.49
   8 -14  -3  182.91    9.71
  -8  14   3  186.98    9.02
   7 -14  -3    4.05    2.85
  -7 -14   3    6.18    3.33
   7 -14  -3    6.85    3.16
  -7  14   3    4.42    2.23
   6 -14  -3  492.64   21.38
  -6  14   3  485.44   20.81
   6 -14  -3  503.22   21.58
  -6 -14   3  494.27   22.13
   5 -14  -3  172.38    8.77
   5 -14  -3  145.60    8.98
  -5 -14   3  167.57    9.06
  -5  14   3  171.19    8.15
   5 -14  -3  176.43    9.86
  -5 -14   3  163.95    9.52
   5 -14  -3  167.34    8.85
   4 -14  -3  767.12   30.99
  -4 -14   3  741.61   31.56
   4 -14  -3  710.47   31.79
  -4 -14   3  775.66   32.05
   4 -14  -3  692.33   31.39
   4 -14  -3  748.48   31.02
   3 -14  -3   31.13    4.55
  -3 -14   3   24.34    3.90
   3 -14  -3   27.60    3.54
   3 -14  -3   22.13    3.42
   3 -14  -3   34.41    3.57
  -3 -14   3   33.00    3.76
  -3 -14   3   35.16    4.93
   2 -14  -3   -1.07    3.22
  -2 -14   3    6.56    2.94
   2 -14  -3    5.26    2.57
  -2 -14   3    4.31    3.67
   2 -14  -3    2.96    2.24
  -2 -14   3    6.38    2.83
   2 -14  -3    3.92    2.58
   1 -14  -3    4.89    2.62
   1 -14  -3    2.08    3.32
  -1 -14   3    2.88    3.09
   1 -14  -3    5.00    2.82
   1 -14  -3   -0.15    2.42
[truncated: 2,957,308 more chars]
